# Supplementary material
Source: publisher site journal article supplement (https://fesmj.pensoft.net/article/download/suppl/6072903/)
Supplement: Supplementary file 1

Archive with 15 entries (14 files):
- metaData.json
- GermanyNUTS3.txt
- Graph.txt
- model.py
- visualization.py
- workspace.RData
- sim.sedml
- simulations/
- simulations/defaultSimulation.py
- simulations/Simulation_Producers.py
- README.txt
- model.sbml
- packages.json
- metadata.rdf
- manifest.xml
