# Supplementary material
Source: publisher site journal article supplement (https://fesmj.pensoft.net/article/download/suppl/6072903/)
Supplement: Supplementary file 1 [file  › GermanyNUTS3.txt]

{"type": "FeatureCollection", "features": [{"type": "Feature", "properties": {"id": "DE111", "na": "Stuttgart, Stadtkreis", "AGS": "08111"}, "geometry": {"type": "Polygon", "coordinates": [[[4265463.151657583, 2859524.9842492123], [4265717.055852792, 2853686.9548477423], [4270541.235561778, 2851524.7217360865], [4263178.013900695, 2846551.585579279], [4265463.151657583, 2842659.565978299], [4255053.079653982, 2844389.3524676235], [4250228.899944997, 2848065.148757438], [4252260.133506675, 2849578.7119355965], [4254545.271263563, 2858660.0910045505], [4264701.439071953, 2859957.4308715435], [4265463.151657583, 2859524.9842492123]]]}}, {"type": "Feature", "properties": {"id": "DE112", "na": "B\u00c3\u00b6blingen", "AGS": "08115"}, "geometry": {"type": "Polygon", "coordinates": [[[4252260.133506675, 2849578.7119355965], [4250228.899944997, 2848065.148757438], [4255053.079653982, 2844389.3524676235], [4254291.367068353, 2841146.00280014], [4260131.163558178, 2835956.6433321666], [4258353.83419171, 2832713.293664683], [4256830.409020451, 2832280.847042352], [4255814.792239612, 2833794.4102205113], [4239057.115355767, 2828605.0507525373], [4234994.648232412, 2821685.9047952397], [4229916.564328216, 2823848.137906895], [4228647.043352168, 2833145.7402870143], [4238295.402770138, 2846119.1389569477], [4234740.744037202, 2847632.7021351065], [4232963.414670734, 2852389.614980749], [4239564.923746187, 2854984.294714736], [4238295.402770138, 2858876.314315716], [4242357.869893495, 2862119.663983199], [4244389.103455173, 2860606.1008050404], [4245150.816040802, 2857795.197759888], [4250736.708335416, 2856930.304515226], [4249721.091554577, 2854551.8480924047], [4252260.133506675, 2849578.7119355965]]]}}, {"type": "Feature", "properties": {"id": "DE113", "na": "Esslingen", "AGS": "08116"}, "geometry": {"type": "Polygon", "coordinates": [[[4284505.966298315, 2849146.265313266], [4283490.349517476, 2839632.4396219812], [4290853.571178559, 2833794.4102205113], [4290853.571178559, 2828821.274063703], [4288568.433421671, 2826659.0409520473], [4290091.858592929, 2825145.477773889], [4271302.948147407, 2825577.9243962197], [4261146.780339017, 2831848.4004200213], [4258353.83419171, 2832713.293664683], [4260131.163558178, 2835956.6433321666], [4254291.367068353, 2841146.00280014], [4255053.079653982, 2844389.3524676235], [4265463.151657583, 2842659.565978299], [4263178.013900695, 2846551.585579279], [4270541.235561778, 2851524.7217360865], [4277396.648832441, 2851957.168358418], [4284505.966298315, 2849146.265313266]]]}}, {"type": "Feature", "properties": {"id": "DE114", "na": "G\u00c3\u00b6ppingen", "AGS": "08117"}, "geometry": {"type": "Polygon", "coordinates": [[[4320052.553627681, 2845902.915645782], [4318783.032651633, 2840064.886244312], [4315228.373918695, 2837253.9831991596], [4316751.799089954, 2835307.9733986696], [4307611.248062403, 2827307.7108855443], [4301009.738986949, 2827740.157507875], [4297201.176058803, 2823415.6912845643], [4290345.762788139, 2824929.254462723], [4290091.858592929, 2825145.477773889], [4288568.433421671, 2826659.0409520473], [4290853.571178559, 2828821.274063703], [4290853.571178559, 2833794.4102205113], [4283490.349517476, 2839632.4396219812], [4284505.966298315, 2849146.265313266], [4292630.900545027, 2850659.828491424], [4293646.517325866, 2851308.498424921], [4301263.6431821585, 2850659.828491424], [4306595.631281564, 2845686.6923346166], [4320052.553627681, 2845902.915645782]]]}}, {"type": "Feature", "properties": {"id": "DE115", "na": "Ludwigsburg", "AGS": "08118"}, "geometry": {"type": "Polygon", "coordinates": [[[4277142.744637232, 2880714.8687434373], [4273334.181709086, 2875957.955897795], [4274857.606880344, 2873579.4994749734], [4274349.7984899245, 2866660.353517676], [4265463.151657583, 2859524.9842492123], [4264701.439071953, 2859957.4308715435], [4254545.271263563, 2858660.0910045505], [4252260.133506675, 2849578.7119355965], [4249721.091554577, 2854551.8480924047], [4250736.708335416, 2856930.304515226], [4245150.816040802, 2857795.197759888], [4244389.103455173, 2860606.1008050404], [4242357.869893495, 2862119.663983199], [4241342.253112655, 2866227.9068953446], [4243627.390869543, 2872714.6062303116], [4238803.211160557, 2880931.0920546027], [4252260.133506675, 2879633.7521876097], [4257084.313215661, 2883741.995099755], [4265209.247462373, 2878768.8589429474], [4277142.744637232, 2880714.8687434373]]]}}, {"type": "Feature", "properties": {"id": "DE116", "na": "Rems-Murr-Kreis", "AGS": "08119"}, "geometry": {"type": "Polygon", "coordinates": [[[4298470.697034852, 2872282.1596079804], [4297455.080254013, 2869687.4798739934], [4302533.164158208, 2864714.343717186], [4304056.589329466, 2857795.197759888], [4294662.134106705, 2856281.634581729], [4293646.517325866, 2851308.498424921], [4292630.900545027, 2850659.828491424], [4284505.966298315, 2849146.265313266], [4277396.648832441, 2851957.168358418], [4270541.235561778, 2851524.7217360865], [4265717.055852792, 2853686.9548477423], [4265463.151657583, 2859524.9842492123], [4274349.7984899245, 2866660.353517676], [4274857.606880344, 2873579.4994749734], [4273334.181709086, 2875957.955897795], [4277142.744637232, 2880714.8687434373], [4277142.744637232, 2881363.538676934], [4278412.26561328, 2881795.985299265], [4284505.966298315, 2885255.558277914], [4287045.0082504125, 2882877.1018550927], [4292630.900545027, 2882228.4319215957], [4295423.846692335, 2872714.6062303116], [4298470.697034852, 2872282.1596079804]]]}}, {"type": "Feature", "properties": {"id": "DE117", "na": "Heilbronn, Stadtkreis", "AGS": "08121"}, "geometry": {"type": "Polygon", "coordinates": [[[4270033.427171359, 2889363.8011900596], [4259623.355167758, 2886985.344767238], [4257592.12160608, 2890661.1410570526], [4259877.259362968, 2893255.8207910396], [4251244.516725836, 2898661.4035701784], [4256068.696434822, 2899526.2968148408], [4259877.259362968, 2899526.2968148408], [4270033.427171359, 2889363.8011900596]]]}}, {"type": "Feature", "properties": {"id": "DE118", "na": "Heilbronn, Landkreis", "AGS": "08125"}, "geometry": {"type": "Polygon", "coordinates": [[[4286537.199859993, 2888498.9079453973], [4284505.966298315, 2885255.558277914], [4278412.26561328, 2881795.985299265], [4277142.744637232, 2881363.538676934], [4277142.744637232, 2880714.8687434373], [4265209.247462373, 2878768.8589429474], [4257084.313215661, 2883741.995099755], [4252260.133506675, 2879633.7521876097], [4238803.211160557, 2880931.0920546027], [4239057.115355767, 2883525.7717885897], [4240072.732136607, 2889363.8011900596], [4235248.552427622, 2891093.587679384], [4234740.744037202, 2898661.4035701784], [4240580.540527026, 2897147.8403920196], [4239818.827941397, 2899526.2968148408], [4244896.911845592, 2900607.4133706684], [4251244.516725836, 2907742.782639132], [4249974.995749787, 2910121.239061953], [4251752.325116256, 2909256.3458172907], [4259115.546777339, 2907094.112705635], [4260131.163558178, 2913148.365418271], [4265970.960048002, 2909688.792439622], [4271556.852342617, 2919202.6181309065], [4275111.5110755535, 2917256.6083304165], [4280443.499174958, 2917040.385019251], [4282982.541127056, 2911851.025551277], [4278920.0740037, 2905580.5495274765], [4278666.16980849, 2902553.4231711584], [4281205.211760588, 2901039.8599929996], [4273080.277513876, 2895418.053902695], [4279427.88239412, 2893255.8207910396], [4280189.594979749, 2886985.344767238], [4286537.199859993, 2888498.9079453973]], [[4270033.427171359, 2889363.8011900596], [4259877.259362968, 2899526.2968148408], [4256068.696434822, 2899526.2968148408], [4251244.516725836, 2898661.4035701784], [4259877.259362968, 2893255.8207910396], [4257592.12160608, 2890661.1410570526], [4259623.355167758, 2886985.344767238], [4270033.427171359, 2889363.8011900596]]]}}, {"type": "Feature", "properties": {"id": "DE119", "na": "Hohenlohekreis", "AGS": "08126"}, "geometry": {"type": "Polygon", "coordinates": [[[4310404.194209711, 2917256.6083304165], [4310912.00260013, 2908607.675883794], [4303802.685134256, 2903202.093104655], [4295677.750887545, 2890877.3643682185], [4286537.199859993, 2888498.9079453973], [4280189.594979749, 2886985.344767238], [4279427.88239412, 2893255.8207910396], [4273080.277513876, 2895418.053902695], [4281205.211760588, 2901039.8599929996], [4278666.16980849, 2902553.4231711584], [4278920.0740037, 2905580.5495274765], [4282982.541127056, 2911851.025551277], [4280443.499174958, 2917040.385019251], [4282220.828541427, 2920499.9579978995], [4290091.858592929, 2918337.724886244], [4291615.283764188, 2919851.2880644035], [4289837.954397719, 2922662.191109556], [4292376.996349817, 2923743.3076653834], [4294662.134106705, 2922445.96779839], [4306595.631281564, 2921581.0745537276], [4310404.194209711, 2917256.6083304165]]]}}, {"type": "Feature", "properties": {"id": "DE11A", "na": "Schw\u00c3\u00a4bisch Hall", "AGS": "08127"}, "geometry": {"type": "Polygon", "coordinates": [[[4329193.104655232, 2919202.6181309065], [4330208.721436072, 2898661.4035701784], [4339095.3682684135, 2893039.5974798743], [4339857.080854042, 2890661.1410570526], [4336048.517925896, 2887201.568078404], [4339349.272463623, 2886769.1214560727], [4339857.080854042, 2882877.1018550927], [4335032.901145057, 2881147.315365768], [4319290.841042052, 2880931.0920546027], [4322083.787189359, 2874228.1694084704], [4314720.565528276, 2872714.6062303116], [4312181.523576179, 2867309.0234511727], [4298470.697034852, 2872282.1596079804], [4295423.846692335, 2872714.6062303116], [4292630.900545027, 2882228.4319215957], [4287045.0082504125, 2882877.1018550927], [4284505.966298315, 2885255.558277914], [4286537.199859993, 2888498.9079453973], [4295677.750887545, 2890877.3643682185], [4303802.685134256, 2903202.093104655], [4310912.00260013, 2908607.675883794], [4310404.194209711, 2917256.6083304165], [4329193.104655232, 2920067.511375569], [4329193.104655232, 2919202.6181309065]]]}}, {"type": "Feature", "properties": {"id": "DE11B", "na": "Main-Tauber-Kreis", "AGS": "08128"}, "geometry": {"type": "Polygon", "coordinates": [[[4327161.871093554, 2936716.7063353164], [4329700.913045652, 2928932.6671333564], [4327923.583679184, 2926121.764088204], [4332747.763388169, 2920283.734686734], [4329193.104655232, 2919202.6181309065], [4329193.104655232, 2920067.511375569], [4310404.194209711, 2917256.6083304165], [4306595.631281564, 2921581.0745537276], [4294662.134106705, 2922445.96779839], [4292376.996349817, 2923743.3076653834], [4285775.487274364, 2925905.540777039], [4286283.295664784, 2936068.0364018204], [4284759.870493525, 2941689.8424921245], [4288314.529226461, 2946879.201960098], [4281459.115955798, 2949473.881694085], [4278412.26561328, 2950338.774938747], [4277650.553027651, 2950987.4448722433], [4279427.88239412, 2953798.3479173956], [4277650.553027651, 2957474.1442072103], [4274603.7026851345, 2954879.4644732233], [4270287.331366569, 2958987.707385369], [4271810.756537827, 2962014.8337416872], [4282982.541127056, 2963095.950297515], [4295677.750887545, 2964393.290164508], [4295931.655082754, 2963095.950297515], [4294408.229911495, 2953365.901295065], [4300248.0264013205, 2957257.920896045], [4308880.769038452, 2954663.241162058], [4311927.619380969, 2940608.725936297], [4314974.469723486, 2941041.172558628], [4315736.182309115, 2930230.00700035], [4322591.595579779, 2930446.2303115157], [4324876.733336667, 2933473.3566678334], [4323607.212360618, 2935203.143157158], [4327161.871093554, 2936716.7063353164]]]}}, {"type": "Feature", "properties": {"id": "DE11C", "na": "Heidenheim", "AGS": "08135"}, "geometry": {"type": "Polygon", "coordinates": [[[4352044.4822241105, 2848065.148757438], [4356868.661933096, 2842659.565978299], [4347728.110905545, 2837902.6531326566], [4340872.697634881, 2843308.235911796], [4340110.985049252, 2837902.6531326566], [4342903.931196559, 2834659.303465173], [4344173.452172609, 2827091.487574379], [4344173.452172609, 2823415.6912845643], [4341634.410220511, 2822550.798039902], [4338079.751487575, 2821902.128106405], [4317513.511675583, 2834875.526776339], [4316751.799089954, 2835307.9733986696], [4315228.373918695, 2837253.9831991596], [4318783.032651633, 2840064.886244312], [4320052.553627681, 2845902.915645782], [4322845.499774989, 2850227.3818690935], [4326146.2543127155, 2848281.3720686035], [4331986.05080254, 2851092.275113756], [4344427.356367818, 2846551.585579279], [4352044.4822241105, 2848065.148757438]]]}}, {"type": "Feature", "properties": {"id": "DE11D", "na": "Ostalbkreis", "AGS": "08136"}, "geometry": {"type": "Polygon", "coordinates": [[[4351028.8654432725, 2873795.722786139], [4354583.524176208, 2867309.0234511727], [4352044.4822241105, 2848065.148757438], [4344427.356367818, 2846551.585579279], [4331986.05080254, 2851092.275113756], [4326146.2543127155, 2848281.3720686035], [4322845.499774989, 2850227.3818690935], [4320052.553627681, 2845902.915645782], [4306595.631281564, 2845686.6923346166], [4301263.6431821585, 2850659.828491424], [4293646.517325866, 2851308.498424921], [4294662.134106705, 2856281.634581729], [4304056.589329466, 2857795.197759888], [4302533.164158208, 2864714.343717186], [4297455.080254013, 2869687.4798739934], [4298470.697034852, 2872282.1596079804], [4312181.523576179, 2867309.0234511727], [4314720.565528276, 2872714.6062303116], [4322083.787189359, 2874228.1694084704], [4319290.841042052, 2880931.0920546027], [4335032.901145057, 2881147.315365768], [4339857.080854042, 2882877.1018550927], [4351028.8654432725, 2873795.722786139]]]}}, {"type": "Feature", "properties": {"id": "DE121", "na": "Baden-Baden, Stadtkreis", "AGS": "08211"}, "geometry": {"type": "Polygon", "coordinates": [[[4197416.827341367, 2845254.245712286], [4191069.222461123, 2840929.7794889743], [4190561.414070703, 2844605.575778789], [4181928.6714335717, 2847848.9254462724], [4188784.084704235, 2850443.605180259], [4185737.234361718, 2860606.1008050404], [4187260.6595329763, 2860606.1008050404], [4195131.689584479, 2854335.624781239], [4197416.827341367, 2845254.245712286]]]}}, {"type": "Feature", "properties": {"id": "DE122", "na": "Karlsruhe, Stadtkreis", "AGS": "08212"}, "geometry": {"type": "Polygon", "coordinates": [[[4194877.78538927, 2876606.6258312915], [4199701.965098254, 2886552.8981449073], [4204780.04900245, 2884606.8883444173], [4206811.282564128, 2887634.014700735], [4207572.995149758, 2883093.325166258], [4212651.079053952, 2880931.0920546027], [4211127.6538826935, 2876606.6258312915], [4213920.600030001, 2872282.1596079804], [4208334.707735387, 2870984.819740987], [4206811.282564128, 2874228.1694084704], [4194877.78538927, 2876606.6258312915]]]}}, {"type": "Feature", "properties": {"id": "DE123", "na": "Karlsruhe, Landkreis", "AGS": "08215"}, "geometry": {"type": "Polygon", "coordinates": [[[4234740.744037202, 2898661.4035701784], [4235248.552427622, 2891093.587679384], [4240072.732136607, 2889363.8011900596], [4239057.115355767, 2883525.7717885897], [4230424.372718636, 2882228.4319215957], [4226869.713985699, 2875957.955897795], [4216713.546177309, 2875957.955897795], [4214174.504225211, 2872065.936296815], [4212143.270663533, 2862552.1106055304], [4208588.611930597, 2860173.654182709], [4210365.941297065, 2857362.7511375565], [4204780.04900245, 2859308.760938047], [4204018.336416821, 2861903.4406720335], [4196655.114755738, 2862552.1106055304], [4196147.306365319, 2868173.916695835], [4200463.677683884, 2870336.1498074904], [4193354.360218011, 2873363.276163808], [4193608.264413221, 2875741.732586629], [4194877.78538927, 2876606.6258312915], [4206811.282564128, 2874228.1694084704], [4208334.707735387, 2870984.819740987], [4213920.600030001, 2872282.1596079804], [4211127.6538826935, 2876606.6258312915], [4212651.079053952, 2880931.0920546027], [4207572.995149758, 2883093.325166258], [4206811.282564128, 2887634.014700735], [4204780.04900245, 2884606.8883444173], [4199701.965098254, 2886552.8981449073], [4204780.04900245, 2901904.753237662], [4203510.528026401, 2903202.093104655], [4205541.76158808, 2905364.3262163107], [4209350.324516226, 2909040.1225061254], [4210873.749687484, 2909688.792439622], [4213412.791639581, 2908175.229261463], [4234740.744037202, 2898661.4035701784]]]}}, {"type": "Feature", "properties": {"id": "DE124", "na": "Rastatt", "AGS": "08216"}, "geometry": {"type": "Polygon", "coordinates": [[[4204780.04900245, 2859308.760938047], [4204780.04900245, 2849146.265313266], [4209604.228711436, 2850443.605180259], [4206557.378368918, 2840497.3328666436], [4203764.432221611, 2837470.2065103254], [4196909.018950948, 2832064.6237311866], [4189799.701485074, 2833794.4102205113], [4191830.935046752, 2834226.856842842], [4171772.5036251815, 2843956.905845292], [4173042.02460123, 2845470.469023451], [4170756.886844342, 2847200.255512776], [4171518.5994299715, 2851092.275113756], [4180405.246262313, 2856065.4112705635], [4184721.617580879, 2866444.1302065104], [4191577.0308515425, 2874228.1694084704], [4193608.264413221, 2875741.732586629], [4193354.360218011, 2873363.276163808], [4200463.677683884, 2870336.1498074904], [4196147.306365319, 2868173.916695835], [4196655.114755738, 2862552.1106055304], [4204018.336416821, 2861903.4406720335], [4204780.04900245, 2859308.760938047]], [[4197416.827341367, 2845254.245712286], [4195131.689584479, 2854335.624781239], [4187260.6595329763, 2860606.1008050404], [4185737.234361718, 2860606.1008050404], [4188784.084704235, 2850443.605180259], [4181928.6714335717, 2847848.9254462724], [4190561.414070703, 2844605.575778789], [4191069.222461123, 2840929.7794889743], [4197416.827341367, 2845254.245712286]]]}}, {"type": "Feature", "properties": {"id": "DE125", "na": "Heidelberg, Stadtkreis", "AGS": "08221"}, "geometry": {"type": "Polygon", "coordinates": [[[4217475.258762938, 2923527.0843542176], [4218236.971348567, 2924824.424221211], [4231693.893694685, 2927635.3272663634], [4233217.318865944, 2921797.2978648935], [4228393.139156958, 2916824.1617080853], [4220776.013300665, 2916607.9383969195], [4219506.492324616, 2917905.2782639135], [4220268.204910246, 2922229.744487224], [4217475.258762938, 2923527.0843542176]]]}}, {"type": "Feature", "properties": {"id": "DE126", "na": "Mannheim, Stadtkreis", "AGS": "08222"}, "geometry": {"type": "Polygon", "coordinates": [[[4218236.971348567, 2935203.143157158], [4215697.929396469, 2930446.2303115157], [4218744.779738987, 2928283.99719986], [4218236.971348567, 2924824.424221211], [4217475.258762938, 2923527.0843542176], [4211889.366468323, 2923094.6377318865], [4210365.941297065, 2926554.2107105358], [4208080.803540177, 2928500.2205110257], [4206811.282564128, 2937797.8228911445], [4206811.282564128, 2941473.6191809587], [4206811.282564128, 2942338.512425621], [4210873.749687484, 2942338.512425621], [4218236.971348567, 2935203.143157158]]]}}, {"type": "Feature", "properties": {"id": "DE127", "na": "Neckar-Odenwald-Kreis", "AGS": "08225"}, "geometry": {"type": "Polygon", "coordinates": [[[4292376.996349817, 2923743.3076653834], [4289837.954397719, 2922662.191109556], [4291615.283764188, 2919851.2880644035], [4290091.858592929, 2918337.724886244], [4282220.828541427, 2920499.9579978995], [4280443.499174958, 2917040.385019251], [4275111.5110755535, 2917256.6083304165], [4271556.852342617, 2919202.6181309065], [4265970.960048002, 2909688.792439622], [4260131.163558178, 2913148.365418271], [4259115.546777339, 2907094.112705635], [4251752.325116256, 2909256.3458172907], [4243881.295064753, 2920067.511375569], [4252006.229311465, 2926337.98739937], [4250228.899944997, 2929148.8904445223], [4254545.271263563, 2935203.143157158], [4257846.02580129, 2934770.6965348264], [4255053.079653982, 2937365.3762688134], [4256068.696434822, 2940824.9492474627], [4265970.960048002, 2941257.3958697934], [4270795.139756988, 2949473.881694085], [4278412.26561328, 2950338.774938747], [4281459.115955798, 2949473.881694085], [4288314.529226461, 2946879.201960098], [4284759.870493525, 2941689.8424921245], [4286283.295664784, 2936068.0364018204], [4285775.487274364, 2925905.540777039], [4292376.996349817, 2923743.3076653834]]]}}, {"type": "Feature", "properties": {"id": "DE128", "na": "Rhein-Neckar-Kreis", "AGS": "08226"}, "geometry": {"type": "Polygon", "coordinates": [[[4241342.253112655, 2932824.6867343364], [4241342.253112655, 2930878.6769338464], [4236010.2650132505, 2929365.113755688], [4233979.031451573, 2922662.191109556], [4237533.690184509, 2920932.404620231], [4244896.911845592, 2927419.1039551976], [4243627.390869543, 2929148.8904445223], [4245150.816040802, 2933040.9100455022], [4254545.271263563, 2935203.143157158], [4250228.899944997, 2929148.8904445223], [4252006.229311465, 2926337.98739937], [4243881.295064753, 2920067.511375569], [4251752.325116256, 2909256.3458172907], [4249974.995749787, 2910121.239061953], [4251244.516725836, 2907742.782639132], [4244896.911845592, 2900607.4133706684], [4239818.827941397, 2899526.2968148408], [4240580.540527026, 2897147.8403920196], [4234740.744037202, 2898661.4035701784], [4213412.791639581, 2908175.229261463], [4210873.749687484, 2909688.792439622], [4208334.707735387, 2912715.9187959395], [4209858.132906646, 2915310.5985299265], [4212143.270663533, 2920716.1813090653], [4209604.228711436, 2920499.9579978995], [4211889.366468323, 2923094.6377318865], [4217475.258762938, 2923527.0843542176], [4220268.204910246, 2922229.744487224], [4219506.492324616, 2917905.2782639135], [4220776.013300665, 2916607.9383969195], [4228393.139156958, 2916824.1617080853], [4233217.318865944, 2921797.2978648935], [4231693.893694685, 2927635.3272663634], [4218236.971348567, 2924824.424221211], [4218744.779738987, 2928283.99719986], [4215697.929396469, 2930446.2303115157], [4218236.971348567, 2935203.143157158], [4221283.821691085, 2937797.8228911445], [4218998.683934197, 2944500.745537277], [4226615.809790489, 2946014.3087154357], [4225092.38461923, 2945149.4154707734], [4227123.618180909, 2936716.7063353164], [4241342.253112655, 2932824.6867343364]]]}}, {"type": "Feature", "properties": {"id": "DE129", "na": "Pforzheim, Stadtkreis", "AGS": "08231"}, "geometry": {"type": "Polygon", "coordinates": [[[4226615.809790489, 2857578.9744487223], [4226615.809790489, 2858227.644382219], [4225346.28881444, 2859092.537626881], [4224838.480424021, 2858876.314315716], [4221029.917495875, 2861254.770738537], [4220776.013300665, 2867741.4700735034], [4229916.564328216, 2868606.3633181658], [4233471.223061153, 2861687.217360868], [4226615.809790489, 2857578.9744487223]]]}}, {"type": "Feature", "properties": {"id": "DE12A", "na": "Calw", "AGS": "08235"}, "geometry": {"type": "Polygon", "coordinates": [[[4226615.809790489, 2857578.9744487223], [4232963.414670734, 2852389.614980749], [4234740.744037202, 2847632.7021351065], [4238295.402770138, 2846119.1389569477], [4228647.043352168, 2833145.7402870143], [4229916.564328216, 2823848.137906895], [4228900.947547377, 2821902.128106405], [4225092.38461923, 2819739.8949947497], [4217983.067153358, 2822118.351417571], [4217221.354567728, 2827740.157507875], [4208080.803540177, 2833578.1869093454], [4203764.432221611, 2837470.2065103254], [4206557.378368918, 2840497.3328666436], [4209604.228711436, 2850443.605180259], [4204780.04900245, 2849146.265313266], [4204780.04900245, 2859308.760938047], [4210365.941297065, 2857362.7511375565], [4223061.151057553, 2856065.4112705635], [4224838.480424021, 2858876.314315716], [4225346.28881444, 2859092.537626881], [4226615.809790489, 2858227.644382219], [4226615.809790489, 2857578.9744487223]]]}}, {"type": "Feature", "properties": {"id": "DE12B", "na": "Enzkreis", "AGS": "08236"}, "geometry": {"type": "Polygon", "coordinates": [[[4242357.869893495, 2862119.663983199], [4238295.402770138, 2858876.314315716], [4239564.923746187, 2854984.294714736], [4232963.414670734, 2852389.614980749], [4226615.809790489, 2857578.9744487223], [4233471.223061153, 2861687.217360868], [4229916.564328216, 2868606.3633181658], [4220776.013300665, 2867741.4700735034], [4221029.917495875, 2861254.770738537], [4224838.480424021, 2858876.314315716], [4223061.151057553, 2856065.4112705635], [4210365.941297065, 2857362.7511375565], [4208588.611930597, 2860173.654182709], [4212143.270663533, 2862552.1106055304], [4214174.504225211, 2872065.936296815], [4216713.546177309, 2875957.955897795], [4226869.713985699, 2875957.955897795], [4230424.372718636, 2882228.4319215957], [4239057.115355767, 2883525.7717885897], [4238803.211160557, 2880931.0920546027], [4243627.390869543, 2872714.6062303116], [4241342.253112655, 2866227.9068953446], [4242357.869893495, 2862119.663983199]]]}}, {"type": "Feature", "properties": {"id": "DE12C", "na": "Freudenstadt", "AGS": "08237"}, "geometry": {"type": "Polygon", "coordinates": [[[4228900.947547377, 2821902.128106405], [4233979.031451573, 2817361.4385719285], [4229916.564328216, 2814550.535526776], [4230170.468523426, 2812172.079103955], [4227377.522376118, 2808063.8361918097], [4217729.162958148, 2810226.069303465], [4208842.516125806, 2808712.5061253062], [4207572.995149758, 2804820.4865243263], [4209858.132906646, 2803090.7000350016], [4209350.324516226, 2801144.6902345116], [4199448.060903045, 2804171.8165908298], [4198432.444122206, 2809361.1760588028], [4195131.689584479, 2805469.156457823], [4191069.222461123, 2810658.5159257962], [4193354.360218011, 2819739.8949947497], [4189291.8930946547, 2823199.467973399], [4188784.084704235, 2833578.1869093454], [4189799.701485074, 2833794.4102205113], [4196909.018950948, 2832064.6237311866], [4203764.432221611, 2837470.2065103254], [4208080.803540177, 2833578.1869093454], [4217221.354567728, 2827740.157507875], [4217983.067153358, 2822118.351417571], [4225092.38461923, 2819739.8949947497], [4228900.947547377, 2821902.128106405]]]}}, {"type": "Feature", "properties": {"id": "DE131", "na": "Freiburg im Breisgau, Stadtkreis", "AGS": "08311"}, "geometry": {"type": "Polygon", "coordinates": [[[4160600.7190359514, 2773251.8830941548], [4162631.9525976297, 2768927.4168708436], [4166186.6113305665, 2768927.4168708436], [4164663.186159308, 2757900.0280013997], [4161870.2400120003, 2756602.6881344067], [4159331.198059903, 2764386.7273363667], [4146382.084104205, 2764170.5040252013], [4149936.7428371417, 2771738.319915996], [4154507.0183509174, 2769576.08680434], [4158823.3896694835, 2775197.8928946448], [4160600.7190359514, 2773251.8830941548]]]}}, {"type": "Feature", "properties": {"id": "DE132", "na": "Breisgau-Hochschwarzwald", "AGS": "08315"}, "geometry": {"type": "Polygon", "coordinates": [[[4158823.3896694835, 2775197.8928946448], [4154507.0183509174, 2769576.08680434], [4149936.7428371417, 2771738.319915996], [4146382.084104205, 2764170.5040252013], [4159331.198059903, 2764386.7273363667], [4161870.2400120003, 2756602.6881344067], [4164663.186159308, 2757900.0280013997], [4166186.6113305665, 2768927.4168708436], [4162631.9525976297, 2768927.4168708436], [4160600.7190359514, 2773251.8830941548], [4176850.587529376, 2774116.7763388166], [4181928.6714335717, 2767846.300315016], [4195639.497974899, 2765251.620581029], [4195131.689584479, 2761143.3776688837], [4201987.102855142, 2755737.7948897444], [4204018.336416821, 2750115.9887994397], [4191323.126656333, 2750332.2121106056], [4184721.617580879, 2742764.396219811], [4178627.916895845, 2745359.0759537974], [4177104.491724586, 2750115.9887994397], [4172534.2162108105, 2749467.3188659432], [4172534.2162108105, 2752061.9985999297], [4169487.365868293, 2752494.4452222614], [4163139.760988049, 2754008.0084004197], [4155268.730936547, 2745575.2992649633], [4142573.521176059, 2741034.6097304868], [4139526.6708335415, 2742980.6195309767], [4136987.628881444, 2739737.269863493], [4135972.012100605, 2744061.7360868044], [4138257.149857493, 2755089.124956248], [4143335.2337616878, 2765251.620581029], [4139526.6708335415, 2771954.5432271613], [4140542.287614381, 2781035.9222961147], [4149682.8386419322, 2780387.252362618], [4158823.3896694835, 2775197.8928946448]]]}}, {"type": "Feature", "properties": {"id": "DE133", "na": "Emmendingen", "AGS": "08316"}, "geometry": {"type": "Polygon", "coordinates": [[[4185737.234361718, 2787306.398319916], [4181420.863043152, 2781468.368918446], [4184213.8091904595, 2775197.8928946448], [4179897.4378718934, 2774116.7763388166], [4181928.6714335717, 2767846.300315016], [4176850.587529376, 2774116.7763388166], [4160600.7190359514, 2773251.8830941548], [4158823.3896694835, 2775197.8928946448], [4149682.8386419322, 2780387.252362618], [4140542.287614381, 2781035.9222961147], [4140542.287614381, 2781684.5922296112], [4148667.2218610933, 2796387.7773888693], [4152729.688984449, 2794009.320966048], [4167456.132306615, 2790765.971298565], [4183706.0008000396, 2792279.5344767235], [4186245.0427521374, 2789252.408120406], [4185737.234361718, 2787306.398319916]]]}}, {"type": "Feature", "properties": {"id": "DE134", "na": "Ortenaukreis", "AGS": "08317"}, "geometry": {"type": "Polygon", "coordinates": [[[4189799.701485074, 2833794.4102205113], [4188784.084704235, 2833578.1869093454], [4189291.8930946547, 2823199.467973399], [4193354.360218011, 2819739.8949947497], [4191069.222461123, 2810658.5159257962], [4195131.689584479, 2805469.156457823], [4196909.018950948, 2800279.79698985], [4193354.360218011, 2798982.457122856], [4195639.497974899, 2789468.631431571], [4193100.456022801, 2785792.835141757], [4185737.234361718, 2787306.398319916], [4186245.0427521374, 2789252.408120406], [4183706.0008000396, 2792279.5344767235], [4167456.132306615, 2790765.971298565], [4152729.688984449, 2794009.320966048], [4148667.2218610933, 2796387.7773888693], [4149936.7428371417, 2801360.9135456774], [4153237.497374869, 2803523.146657333], [4153237.497374869, 2811955.8557927897], [4155776.5393269663, 2821902.128106405], [4158823.3896694835, 2824496.807840392], [4159077.293864693, 2833361.9635981796], [4170756.886844342, 2847200.255512776], [4173042.02460123, 2845470.469023451], [4171772.5036251815, 2843956.905845292], [4191830.935046752, 2834226.856842842], [4189799.701485074, 2833794.4102205113]]]}}, {"type": "Feature", "properties": {"id": "DE135", "na": "Rottweil", "AGS": "08325"}, "geometry": {"type": "Polygon", "coordinates": [[[4227377.522376118, 2808063.8361918097], [4227885.330766538, 2804820.4865243263], [4223315.0552527625, 2797252.6706335316], [4228139.234961748, 2783630.602030101], [4216967.450372519, 2774549.2229611482], [4214174.504225211, 2774981.669583479], [4210619.8454922745, 2784711.7185859294], [4193100.456022801, 2785792.835141757], [4195639.497974899, 2789468.631431571], [4193354.360218011, 2798982.457122856], [4196909.018950948, 2800279.79698985], [4195131.689584479, 2805469.156457823], [4198432.444122206, 2809361.1760588028], [4199448.060903045, 2804171.8165908298], [4209350.324516226, 2801144.6902345116], [4209858.132906646, 2803090.7000350016], [4207572.995149758, 2804820.4865243263], [4208842.516125806, 2808712.5061253062], [4217729.162958148, 2810226.069303465], [4227377.522376118, 2808063.8361918097]]]}}, {"type": "Feature", "properties": {"id": "DE136", "na": "Schwarzwald-Baar-Kreis", "AGS": "08326"}, "geometry": {"type": "Polygon", "coordinates": [[[4193100.456022801, 2785792.835141757], [4210619.8454922745, 2784711.7185859294], [4214174.504225211, 2774981.669583479], [4216967.450372519, 2774549.2229611482], [4219252.588129407, 2771738.319915996], [4221029.917495875, 2762873.164158208], [4215444.02520126, 2760062.2611130555], [4215444.02520126, 2755737.7948897444], [4219252.588129407, 2749899.7654882744], [4216967.450372519, 2744061.7360868044], [4213666.695834791, 2744710.406020301], [4209350.324516226, 2741467.0563528175], [4210873.749687484, 2742980.6195309767], [4209096.420321016, 2747521.3090654532], [4204018.336416821, 2750115.9887994397], [4201987.102855142, 2755737.7948897444], [4195131.689584479, 2761143.3776688837], [4195639.497974899, 2765251.620581029], [4181928.6714335717, 2767846.300315016], [4179897.4378718934, 2774116.7763388166], [4184213.8091904595, 2775197.8928946448], [4181420.863043152, 2781468.368918446], [4185737.234361718, 2787306.398319916], [4193100.456022801, 2785792.835141757]]]}}, {"type": "Feature", "properties": {"id": "DE214", "na": "Alt\u00c3\u00b6tting", "AGS": "09171"}, "geometry": {"type": "Polygon", "coordinates": [[[4539933.586679334, 2792495.7577878893], [4534347.694384719, 2791847.087854393], [4525968.855942797, 2781468.368918446], [4520890.772038601, 2773900.5530276513], [4516066.592329617, 2773684.329716486], [4510734.604230211, 2782333.262163108], [4512004.12520626, 2786225.281764088], [4513273.646182309, 2788603.7381869094], [4511242.412620631, 2805685.379768988], [4514289.262963148, 2807847.612880644], [4516828.304915246, 2806334.049702485], [4530285.227261363, 2804171.8165908298], [4539933.586679334, 2792495.7577878893]]]}}, {"type": "Feature", "properties": {"id": "DE215", "na": "Berchtesgadener Land", "AGS": "09172"}, "geometry": {"type": "Polygon", "coordinates": [[[4550597.562878144, 2716601.3755687783], [4550851.467073353, 2713358.0259012952], [4547550.712535627, 2710114.6762338113], [4532570.36501825, 2718763.608680434], [4530285.227261363, 2722439.404970248], [4532062.556627831, 2725898.9779488975], [4527238.376918846, 2733034.3472173605], [4523429.813990699, 2733466.793839692], [4524953.239161958, 2739304.823241162], [4534601.598579928, 2742115.7262863144], [4526476.664333217, 2747521.3090654532], [4525207.143357168, 2751197.1053552674], [4526730.568528427, 2756170.2415120755], [4536125.023751188, 2755737.7948897444], [4533839.8859943, 2762008.270913546], [4535871.119555978, 2762440.7175358767], [4535871.119555978, 2765251.620581029], [4538410.161508076, 2764602.950647532], [4545773.383169158, 2752926.891844592], [4538917.969898495, 2738656.153307665], [4549835.850292515, 2737575.0367518375], [4553898.317415871, 2729358.5509275463], [4550089.754487724, 2723520.5215260764], [4549328.041902095, 2717898.7154357717], [4550597.562878144, 2716601.3755687783]]]}}, {"type": "Feature", "properties": {"id": "DE216", "na": "Bad T\u00c3\u00b6lz-Wolfratshausen", "AGS": "09173"}, "geometry": {"type": "Polygon", "coordinates": [[[4442434.375718785, 2757683.8046902344], [4445481.226061303, 2754224.2317115855], [4443449.992499625, 2749899.7654882744], [4443703.896694834, 2743413.0661533074], [4447258.555427771, 2726763.87119356], [4441164.8547427375, 2721142.065103255], [4443957.800890044, 2721142.065103255], [4439387.525376269, 2712493.132656633], [4427200.124006201, 2710114.6762338113], [4416028.3394169705, 2719412.2786139306], [4417551.764588229, 2728709.88099405], [4421868.135906795, 2731953.230661533], [4426946.219810991, 2738007.4833741686], [4425422.794639732, 2743413.0661533074], [4420598.614930746, 2746223.9691984598], [4420852.519125956, 2758764.921246062], [4425930.603030152, 2759846.03780189], [4427707.93239662, 2763738.05740287], [4430246.974348717, 2762440.7175358767], [4437864.10020501, 2761792.04760238], [4442434.375718785, 2757683.8046902344]]]}}, {"type": "Feature", "properties": {"id": "DE217", "na": "Dachau", "AGS": "09174"}, "geometry": {"type": "Polygon", "coordinates": [[[4431516.495324766, 2815199.2054602727], [4432786.016300815, 2805901.603080154], [4437610.1960098, 2803739.369968498], [4438118.00440022, 2799631.127056353], [4432532.112105605, 2793793.097654883], [4425422.794639732, 2788819.961498075], [4423391.561078054, 2792279.5344767235], [4419582.998149907, 2791414.6412320617], [4409680.734536727, 2797901.340567028], [4403840.938046902, 2795522.8841442075], [4404094.842242112, 2800712.2436121805], [4408157.309365468, 2803306.9233461674], [4409680.734536727, 2808928.729436472], [4408157.309365468, 2812172.079103955], [4418059.572978649, 2816280.322016101], [4421614.231711585, 2816064.098704935], [4424914.986249313, 2813253.1956597827], [4431516.495324766, 2815199.2054602727]]]}}, {"type": "Feature", "properties": {"id": "DE218", "na": "Ebersberg", "AGS": "09175"}, "geometry": {"type": "Polygon", "coordinates": [[[4473156.783339167, 2782981.9320966047], [4476203.633681684, 2781035.9222961147], [4475695.825291265, 2776927.679383969], [4477727.058852943, 2766548.9604480225], [4471633.358167908, 2762656.940847042], [4465539.657482874, 2766332.7371368567], [4465793.561678084, 2761575.8242912143], [4459192.05260263, 2761143.3776688837], [4452336.639331967, 2766332.7371368567], [4454367.8728936445, 2773035.659782989], [4451067.118355918, 2781900.815540777], [4452844.447722387, 2783846.825341267], [4451574.926746337, 2791198.417920896], [4454621.777088854, 2791198.417920896], [4473156.783339167, 2782981.9320966047]]]}}, {"type": "Feature", "properties": {"id": "DE219", "na": "Eichst\u00c3\u00a4tt", "AGS": "09176"}, "geometry": {"type": "Polygon", "coordinates": [[[4438118.00440022, 2872282.1596079804], [4445989.034451722, 2868606.3633181658], [4446496.842842142, 2856930.304515226], [4448781.98059903, 2857362.7511375565], [4447512.459622981, 2853686.9548477423], [4443957.800890044, 2852605.8382919147], [4441672.6631331565, 2856714.0812040605], [4438879.71698585, 2856930.304515226], [4433293.824691234, 2847848.9254462724], [4430500.878543927, 2849146.265313266], [4431262.591129556, 2853470.7315365765], [4424407.177858893, 2856930.304515226], [4422883.752687634, 2853038.284914246], [4413235.393269664, 2852605.8382919147], [4403333.1296564825, 2856065.4112705635], [4398762.854142707, 2853470.7315365765], [4397493.333166658, 2856930.304515226], [4394954.291214561, 2856930.304515226], [4389876.2073103655, 2861470.994049703], [4399524.566728337, 2867092.800140007], [4398001.141557078, 2869255.0332516627], [4404602.650632531, 2873147.0528526427], [4408919.021951098, 2882228.4319215957], [4418059.572978649, 2877039.0724536227], [4423899.369468473, 2881579.7619880997], [4422375.944297215, 2886120.451522576], [4425422.794639732, 2884606.8883444173], [4433293.824691234, 2885255.558277914], [4432024.303715186, 2880931.0920546027], [4438118.00440022, 2872282.1596079804]]]}}, {"type": "Feature", "properties": {"id": "DE21A", "na": "Erding", "AGS": "09177"}, "geometry": {"type": "Polygon", "coordinates": [[[4470363.837191859, 2814982.9821491074], [4481281.717585879, 2814334.3122156104], [4487883.226661333, 2803523.146657333], [4488391.035051753, 2799847.350367518], [4484582.472123606, 2791847.087854393], [4472141.166558328, 2784927.9418970947], [4473156.783339167, 2782981.9320966047], [4454621.777088854, 2791198.417920896], [4451574.926746337, 2791198.417920896], [4450051.501575079, 2797468.8939446975], [4454875.681284064, 2810009.8459922997], [4467570.891044552, 2817361.4385719285], [4470363.837191859, 2814982.9821491074]]]}}, {"type": "Feature", "properties": {"id": "DE21B", "na": "Freising", "AGS": "09178"}, "geometry": {"type": "Polygon", "coordinates": [[[4461984.998749938, 2832064.6237311866], [4465793.561678084, 2831199.7304865243], [4469348.22041102, 2822334.5747287367], [4470363.837191859, 2814982.9821491074], [4467570.891044552, 2817361.4385719285], [4454875.681284064, 2810009.8459922997], [4450051.501575079, 2797468.8939446975], [4440910.9505475275, 2796387.7773888693], [4438118.00440022, 2799631.127056353], [4437610.1960098, 2803739.369968498], [4432786.016300815, 2805901.603080154], [4431516.495324766, 2815199.2054602727], [4436086.770838542, 2820821.0115505774], [4440403.142157108, 2818010.108505425], [4443957.800890044, 2821902.128106405], [4443449.992499625, 2829037.497374869], [4447004.651232561, 2831848.4004200213], [4446750.747037352, 2835091.7500875043], [4450305.405770289, 2833361.9635981796], [4461984.998749938, 2832064.6237311866]]]}}, {"type": "Feature", "properties": {"id": "DE21C", "na": "F\u00c3\u00bcrstenfeldbruck", "AGS": "09179"}, "geometry": {"type": "Polygon", "coordinates": [[[4425422.794639732, 2788819.961498075], [4422375.944297215, 2783630.602030101], [4426184.507225361, 2780387.252362618], [4424153.273663683, 2778657.4658732936], [4421360.327516376, 2777792.5726286313], [4415774.435221761, 2781035.9222961147], [4405618.26741337, 2776711.4560728036], [4399778.470923546, 2777143.9026951347], [4398001.141557078, 2787090.1750087505], [4399778.470923546, 2787522.621631081], [4398001.141557078, 2791198.417920896], [4399778.470923546, 2796171.5540777035], [4403840.938046902, 2795522.8841442075], [4409680.734536727, 2797901.340567028], [4419582.998149907, 2791414.6412320617], [4423391.561078054, 2792279.5344767235], [4425422.794639732, 2788819.961498075]]]}}, {"type": "Feature", "properties": {"id": "DE21D", "na": "Garmisch-Partenkirchen", "AGS": "09180"}, "geometry": {"type": "Polygon", "coordinates": [[[4421868.135906795, 2731953.230661533], [4417551.764588229, 2728709.88099405], [4416028.3394169705, 2719412.2786139306], [4427200.124006201, 2710114.6762338113], [4425422.794639732, 2707519.9964998253], [4428215.7407870395, 2704492.870143507], [4421868.135906795, 2704709.093454673], [4416790.052002599, 2699087.2873643683], [4413235.393269664, 2698871.0640532025], [4415520.5310265515, 2702330.6370318513], [4411965.872293615, 2702979.3069653483], [4405110.459022951, 2698654.840742037], [4397747.237361868, 2698654.840742037], [4395969.907995399, 2698654.840742037], [4390891.824091204, 2706871.3265663283], [4386575.452772639, 2707952.443122156], [4389114.494724736, 2712060.6860343018], [4387844.973748688, 2714006.6958347918], [4386829.356967848, 2718114.9387469376], [4392669.153457673, 2723088.074903745], [4395208.19540977, 2727196.3178158905], [4393430.866043302, 2731953.230661533], [4394446.482824141, 2733899.240462023], [4408665.117755888, 2735196.5803290163], [4421868.135906795, 2731953.230661533]]]}}, {"type": "Feature", "properties": {"id": "DE21E", "na": "Landsberg am Lech", "AGS": "09181"}, "geometry": {"type": "Polygon", "coordinates": [[[4398001.141557078, 2787090.1750087505], [4399778.470923546, 2777143.9026951347], [4405618.26741337, 2776711.4560728036], [4406887.788389419, 2760710.931046552], [4401047.991899595, 2754656.6783339167], [4378450.518525926, 2748169.9789989498], [4378958.326916345, 2757900.0280013997], [4382766.889844492, 2765035.3972698636], [4381751.273063653, 2768927.4168708436], [4377434.9017450875, 2770008.5334266713], [4381751.273063653, 2776927.679383969], [4380735.656282814, 2777143.9026951347], [4379466.135306765, 2782117.038851943], [4384290.315015751, 2781900.815540777], [4388098.877943898, 2791847.087854393], [4389876.2073103655, 2791630.864543227], [4392415.249262463, 2787738.844942247], [4398001.141557078, 2787090.1750087505]]]}}, {"type": "Feature", "properties": {"id": "DE21F", "na": "Miesbach", "AGS": "09182"}, "geometry": {"type": "Polygon", "coordinates": [[[4456145.202260112, 2758548.6979348967], [4459953.765188259, 2751629.551977599], [4466809.178458923, 2749899.7654882744], [4467316.9868493425, 2747305.0857542874], [4464524.040702035, 2746007.7458872944], [4470109.932996649, 2742331.94959748], [4473410.687534377, 2728061.211060553], [4475949.729486475, 2725034.084704235], [4465031.849092455, 2724169.191459573], [4459699.86099305, 2720277.171858593], [4443957.800890044, 2721142.065103255], [4441164.8547427375, 2721142.065103255], [4447258.555427771, 2726763.87119356], [4443703.896694834, 2743413.0661533074], [4443449.992499625, 2749899.7654882744], [4445481.226061303, 2754224.2317115855], [4442434.375718785, 2757683.8046902344], [4454621.777088854, 2758981.144557228], [4456145.202260112, 2758548.6979348967]]]}}, {"type": "Feature", "properties": {"id": "DE21G", "na": "M\u00c3\u00bchldorf a. Inn", "AGS": "09183"}, "geometry": {"type": "Polygon", "coordinates": [[[4514289.262963148, 2807847.612880644], [4511242.412620631, 2805685.379768988], [4513273.646182309, 2788603.7381869094], [4512004.12520626, 2786225.281764088], [4498801.107055353, 2781035.9222961147], [4491437.88539427, 2779522.359117956], [4485344.184709235, 2783630.602030101], [4482297.334366718, 2776711.4560728036], [4480012.1966098305, 2778225.0192509624], [4481027.813390669, 2780387.252362618], [4480012.1966098305, 2781900.815540777], [4476203.633681684, 2781035.9222961147], [4473156.783339167, 2782981.9320966047], [4472141.166558328, 2784927.9418970947], [4484582.472123606, 2791847.087854393], [4488391.035051753, 2799847.350367518], [4487883.226661333, 2803523.146657333], [4495754.256712835, 2804604.2632131604], [4504894.807740387, 2816064.098704935], [4507941.658082904, 2814982.9821491074], [4514289.262963148, 2807847.612880644]]]}}, {"type": "Feature", "properties": {"id": "DE21H", "na": "M\u00c3\u00bcnchen, Landkreis", "AGS": "09184"}, "geometry": {"type": "Polygon", "coordinates": [[[4450051.501575079, 2797468.8939446975], [4451574.926746337, 2791198.417920896], [4452844.447722387, 2783846.825341267], [4451067.118355918, 2781900.815540777], [4454367.8728936445, 2773035.659782989], [4452336.639331967, 2766332.7371368567], [4459192.05260263, 2761143.3776688837], [4456145.202260112, 2758548.6979348967], [4454621.777088854, 2758981.144557228], [4442434.375718785, 2757683.8046902344], [4437864.10020501, 2761792.04760238], [4430246.974348717, 2762440.7175358767], [4427707.93239662, 2763738.05740287], [4425930.603030152, 2765684.06720336], [4427961.83659183, 2767630.07700385], [4427200.124006201, 2776927.679383969], [4424153.273663683, 2778657.4658732936], [4426184.507225361, 2780387.252362618], [4429993.070153507, 2780603.4756737836], [4430754.782739136, 2775414.1162058106], [4433547.728886444, 2773251.8830941548], [4439133.621181059, 2776927.679383969], [4446750.747037352, 2775197.8928946448], [4449289.788989449, 2781900.815540777], [4442180.4715235755, 2786441.5050752535], [4442688.279913995, 2791630.864543227], [4434309.441472074, 2793144.427721386], [4432532.112105605, 2793793.097654883], [4438118.00440022, 2799631.127056353], [4440910.9505475275, 2796387.7773888693], [4450051.501575079, 2797468.8939446975]]]}}, {"type": "Feature", "properties": {"id": "DE21I", "na": "Neuburg-Schrobenhausen", "AGS": "09185"}, "geometry": {"type": "Polygon", "coordinates": [[[4413235.393269664, 2852605.8382919147], [4422122.040102005, 2842875.7892894642], [4426438.411420571, 2843956.905845292], [4428215.7407870395, 2843092.01260063], [4426946.219810991, 2838118.876443822], [4420344.710735537, 2833578.1869093454], [4420090.806540327, 2825577.9243962197], [4416790.052002599, 2818658.778438922], [4413997.105855293, 2818010.108505425], [4409934.638731936, 2824929.254462723], [4404094.842242112, 2827523.9341967097], [4406379.979999, 2828388.827441372], [4406126.07580379, 2832064.6237311866], [4398255.045752288, 2832713.293664683], [4396477.716385819, 2834659.303465173], [4397493.333166658, 2837470.2065103254], [4393430.866043302, 2842659.565978299], [4392923.057652882, 2855632.9646482323], [4394954.291214561, 2856930.304515226], [4397493.333166658, 2856930.304515226], [4398762.854142707, 2853470.7315365765], [4403333.1296564825, 2856065.4112705635], [4413235.393269664, 2852605.8382919147]]]}}, {"type": "Feature", "properties": {"id": "DE21J", "na": "Pfaffenhofen a. d. Ilm", "AGS": "09186"}, "geometry": {"type": "Polygon", "coordinates": [[[4447512.459622981, 2853686.9548477423], [4442688.279913995, 2849146.265313266], [4442688.279913995, 2844389.3524676235], [4445735.130256513, 2842443.3426671335], [4446750.747037352, 2835091.7500875043], [4447004.651232561, 2831848.4004200213], [4443449.992499625, 2829037.497374869], [4443957.800890044, 2821902.128106405], [4440403.142157108, 2818010.108505425], [4436086.770838542, 2820821.0115505774], [4431516.495324766, 2815199.2054602727], [4424914.986249313, 2813253.1956597827], [4421614.231711585, 2816064.098704935], [4418059.572978649, 2816280.322016101], [4416790.052002599, 2818658.778438922], [4420090.806540327, 2825577.9243962197], [4420344.710735537, 2833578.1869093454], [4426946.219810991, 2838118.876443822], [4428215.7407870395, 2843092.01260063], [4426438.411420571, 2843956.905845292], [4430500.878543927, 2849146.265313266], [4433293.824691234, 2847848.9254462724], [4438879.71698585, 2856930.304515226], [4441672.6631331565, 2856714.0812040605], [4443957.800890044, 2852605.8382919147], [4447512.459622981, 2853686.9548477423]]]}}, {"type": "Feature", "properties": {"id": "DE21K", "na": "Rosenheim, Landkreis", "AGS": "09187"}, "geometry": {"type": "Polygon", "coordinates": [[[4498801.107055353, 2781035.9222961147], [4494484.735736786, 2775414.1162058106], [4496769.873493675, 2772386.9898494924], [4494738.639931996, 2765467.8438921943], [4503371.382569129, 2762224.4942247113], [4503625.286764339, 2759413.591179559], [4501086.244812241, 2754224.2317115855], [4498039.394469723, 2753575.561778089], [4500070.628031401, 2747305.0857542874], [4496515.969298465, 2734331.6870843545], [4490676.172808641, 2732169.4539726987], [4489406.651832592, 2733683.0171508575], [4490930.07700385, 2738007.4833741686], [4485090.280514026, 2734331.6870843545], [4487121.514075704, 2724385.414770738], [4475949.729486475, 2725034.084704235], [4473410.687534377, 2728061.211060553], [4470109.932996649, 2742331.94959748], [4464524.040702035, 2746007.7458872944], [4467316.9868493425, 2747305.0857542874], [4466809.178458923, 2749899.7654882744], [4459953.765188259, 2751629.551977599], [4456145.202260112, 2758548.6979348967], [4459192.05260263, 2761143.3776688837], [4465793.561678084, 2761575.8242912143], [4465539.657482874, 2766332.7371368567], [4471633.358167908, 2762656.940847042], [4477727.058852943, 2766548.9604480225], [4475695.825291265, 2776927.679383969], [4476203.633681684, 2781035.9222961147], [4480012.1966098305, 2781900.815540777], [4481027.813390669, 2780387.252362618], [4480012.1966098305, 2778225.0192509624], [4482297.334366718, 2776711.4560728036], [4485344.184709235, 2783630.602030101], [4491437.88539427, 2779522.359117956], [4498801.107055353, 2781035.9222961147]], [[4482043.430171508, 2749683.542177109], [4480773.909195459, 2753359.338466923], [4481027.813390669, 2754872.901645082], [4476457.537876894, 2752278.2219110955], [4474934.112705635, 2747088.862443122], [4480520.00500025, 2746872.6391319567], [4482043.430171508, 2749683.542177109]]]}}, {"type": "Feature", "properties": {"id": "DE21L", "na": "Starnberg", "AGS": "09188"}, "geometry": {"type": "Polygon", "coordinates": [[[4424153.273663683, 2778657.4658732936], [4427200.124006201, 2776927.679383969], [4427961.83659183, 2767630.07700385], [4425930.603030152, 2765684.06720336], [4427707.93239662, 2763738.05740287], [4425930.603030152, 2759846.03780189], [4420852.519125956, 2758764.921246062], [4420598.614930746, 2746223.9691984598], [4410188.542927146, 2755089.124956248], [4409426.830341517, 2760278.4844242213], [4406887.788389419, 2760710.931046552], [4405618.26741337, 2776711.4560728036], [4415774.435221761, 2781035.9222961147], [4421360.327516376, 2777792.5726286313], [4424153.273663683, 2778657.4658732936]]]}}, {"type": "Feature", "properties": {"id": "DE21M", "na": "Traunstein", "AGS": "09189"}, "geometry": {"type": "Polygon", "coordinates": [[[4525968.855942797, 2781468.368918446], [4526730.568528427, 2777143.9026951347], [4534601.598579928, 2768927.4168708436], [4535871.119555978, 2765251.620581029], [4535871.119555978, 2762440.7175358767], [4533839.8859943, 2762008.270913546], [4536125.023751188, 2755737.7948897444], [4526730.568528427, 2756170.2415120755], [4525207.143357168, 2751197.1053552674], [4526476.664333217, 2747521.3090654532], [4534601.598579928, 2742115.7262863144], [4524953.239161958, 2739304.823241162], [4523429.813990699, 2733466.793839692], [4516574.400720036, 2732385.6772838645], [4514543.167158358, 2727628.764438222], [4508957.274863743, 2726547.647882394], [4503371.382569129, 2734331.6870843545], [4496515.969298465, 2734331.6870843545], [4500070.628031401, 2747305.0857542874], [4498039.394469723, 2753575.561778089], [4501086.244812241, 2754224.2317115855], [4503625.286764339, 2759413.591179559], [4503371.382569129, 2762224.4942247113], [4494738.639931996, 2765467.8438921943], [4496769.873493675, 2772386.9898494924], [4494484.735736786, 2775414.1162058106], [4498801.107055353, 2781035.9222961147], [4512004.12520626, 2786225.281764088], [4510734.604230211, 2782333.262163108], [4516066.592329617, 2773684.329716486], [4520890.772038601, 2773900.5530276513], [4525968.855942797, 2781468.368918446]]]}}, {"type": "Feature", "properties": {"id": "DE21N", "na": "Weilheim-Schongau", "AGS": "09190"}, "geometry": {"type": "Polygon", "coordinates": [[[4420598.614930746, 2746223.9691984598], [4425422.794639732, 2743413.0661533074], [4426946.219810991, 2738007.4833741686], [4421868.135906795, 2731953.230661533], [4408665.117755888, 2735196.5803290163], [4394446.482824141, 2733899.240462023], [4393430.866043302, 2731953.230661533], [4395208.19540977, 2727196.3178158905], [4392669.153457673, 2723088.074903745], [4374641.95559778, 2732601.90059503], [4378450.518525926, 2748169.9789989498], [4401047.991899595, 2754656.6783339167], [4406887.788389419, 2760710.931046552], [4409426.830341517, 2760278.4844242213], [4410188.542927146, 2755089.124956248], [4420598.614930746, 2746223.9691984598]]]}}, {"type": "Feature", "properties": {"id": "DE221", "na": "Landshut, Kreisfreie Stadt", "AGS": "09261"}, "geometry": {"type": "Polygon", "coordinates": [[[4482551.238561928, 2825361.7010850543], [4470363.837191859, 2824064.361218061], [4486613.705685284, 2833578.1869093454], [4489406.651832592, 2833361.9635981796], [4482551.238561928, 2825361.7010850543]]]}}, {"type": "Feature", "properties": {"id": "DE222", "na": "Passau, Kreisfreie Stadt", "AGS": "09262"}, "geometry": {"type": "Polygon", "coordinates": [[[4580050.449522477, 2837037.7598879943], [4574972.365618281, 2832064.6237311866], [4571417.706885344, 2831415.9537976896], [4564562.29361468, 2837470.2065103254], [4573956.748837441, 2838335.0997549878], [4580050.449522477, 2837037.7598879943]]]}}, {"type": "Feature", "properties": {"id": "DE223", "na": "Straubing, Kreisfreie Stadt", "AGS": "09263"}, "geometry": {"type": "Polygon", "coordinates": [[[4516574.400720036, 2866444.1302065104], [4507433.849692484, 2862335.8872943646], [4502863.574178709, 2864930.567028351], [4506418.232911645, 2868390.1400070004], [4508449.466473323, 2870552.3731186558], [4516320.496524826, 2869255.0332516627], [4516574.400720036, 2866444.1302065104]]]}}, {"type": "Feature", "properties": {"id": "DE224", "na": "Deggendorf", "AGS": "09271"}, "geometry": {"type": "Polygon", "coordinates": [[[4555421.742587129, 2866227.9068953446], [4559484.209710485, 2859741.207560378], [4560753.730686534, 2852822.06160308], [4560245.922296114, 2849578.7119355965], [4550343.658682934, 2846551.585579279], [4548820.233511675, 2840497.3328666436], [4541964.820241012, 2836389.0899544978], [4539933.586679334, 2837470.2065103254], [4537902.353117656, 2842010.896044802], [4526730.568528427, 2848497.595379769], [4524191.526576329, 2857578.9744487223], [4522922.00560028, 2859957.4308715435], [4524191.526576329, 2861903.4406720335], [4530031.323066153, 2862552.1106055304], [4529015.706285315, 2867957.6933846693], [4532824.26921346, 2875309.285964298], [4534347.694384719, 2873363.276163808], [4541457.011850592, 2875093.0626531327], [4545519.478973948, 2867957.6933846693], [4555421.742587129, 2866227.9068953446]]]}}, {"type": "Feature", "properties": {"id": "DE225", "na": "Freyung-Grafenau", "AGS": "09272"}, "geometry": {"type": "Polygon", "coordinates": [[[4581066.066303315, 2878985.0822541127], [4586905.86279314, 2877039.0724536227], [4588937.096354818, 2871201.0430521527], [4593507.371868594, 2869687.4798739934], [4603155.731286565, 2858227.644382219], [4600362.785139257, 2851740.9450472523], [4585382.43762188, 2847632.7021351065], [4579288.736936847, 2852389.614980749], [4575734.07820391, 2850443.605180259], [4572433.323666183, 2855200.518025901], [4560753.730686534, 2852822.06160308], [4559484.209710485, 2859741.207560378], [4555421.742587129, 2866227.9068953446], [4562023.251662583, 2868173.916695835], [4561515.443272164, 2877039.0724536227], [4571163.802690134, 2879849.975498775], [4578019.215960798, 2875957.955897795], [4577765.311765589, 2878985.0822541127], [4581066.066303315, 2878985.0822541127]]]}}, {"type": "Feature", "properties": {"id": "DE226", "na": "Kelheim", "AGS": "09273"}, "geometry": {"type": "Polygon", "coordinates": [[[4475188.016900845, 2853254.508225411], [4461223.286164308, 2844821.7990899542], [4459445.95679784, 2839632.4396219812], [4461984.998749938, 2832064.6237311866], [4450305.405770289, 2833361.9635981796], [4446750.747037352, 2835091.7500875043], [4445735.130256513, 2842443.3426671335], [4442688.279913995, 2844389.3524676235], [4442688.279913995, 2849146.265313266], [4447512.459622981, 2853686.9548477423], [4448781.98059903, 2857362.7511375565], [4446496.842842142, 2856930.304515226], [4445989.034451722, 2868606.3633181658], [4438118.00440022, 2872282.1596079804], [4439133.621181059, 2878552.6356317815], [4442434.375718785, 2879417.528876444], [4450305.405770289, 2875957.955897795], [4453098.351917596, 2880066.1988099404], [4457668.627431371, 2880282.4221211057], [4462492.807140357, 2874228.1694084704], [4472395.070753537, 2872282.1596079804], [4476457.537876894, 2867309.0234511727], [4477473.154657733, 2864930.567028351], [4475188.016900845, 2861903.4406720335], [4475188.016900845, 2853254.508225411]]]}}, {"type": "Feature", "properties": {"id": "DE227", "na": "Landshut, Landkreis", "AGS": "09274"}, "geometry": {"type": "Polygon", "coordinates": [[[4477980.963048153, 2852605.8382919147], [4492453.5021751085, 2848065.148757438], [4497785.490274513, 2839632.4396219812], [4494738.639931996, 2837470.2065103254], [4494484.735736786, 2831415.9537976896], [4499055.011250563, 2828388.827441372], [4505148.711935597, 2830334.837241862], [4506418.232911645, 2824280.5845292266], [4503625.286764339, 2822334.5747287367], [4504894.807740387, 2816064.098704935], [4495754.256712835, 2804604.2632131604], [4487883.226661333, 2803523.146657333], [4481281.717585879, 2814334.3122156104], [4470363.837191859, 2814982.9821491074], [4469348.22041102, 2822334.5747287367], [4465793.561678084, 2831199.7304865243], [4461984.998749938, 2832064.6237311866], [4459445.95679784, 2839632.4396219812], [4461223.286164308, 2844821.7990899542], [4475188.016900845, 2853254.508225411], [4475949.729486475, 2852389.614980749], [4477980.963048153, 2852605.8382919147]], [[4482551.238561928, 2825361.7010850543], [4489406.651832592, 2833361.9635981796], [4486613.705685284, 2833578.1869093454], [4470363.837191859, 2824064.361218061], [4482551.238561928, 2825361.7010850543]]]}}, {"type": "Feature", "properties": {"id": "DE228", "na": "Passau, Landkreis", "AGS": "09275"}, "geometry": {"type": "Polygon", "coordinates": [[[4600362.785139257, 2851740.9450472523], [4602901.827091355, 2841146.00280014], [4596300.3180159, 2829037.497374869], [4584366.820841042, 2834010.6335316766], [4580050.449522477, 2837037.7598879943], [4573956.748837441, 2838335.0997549878], [4564562.29361468, 2837470.2065103254], [4571417.706885344, 2831415.9537976896], [4574972.365618281, 2832064.6237311866], [4576495.790789539, 2827956.380819041], [4573448.940447022, 2812388.3024151204], [4562531.060053002, 2803090.7000350016], [4556691.2635631785, 2802874.476723836], [4554660.030001501, 2807847.612880644], [4549328.041902095, 2811090.9625481274], [4555929.550977549, 2816064.098704935], [4549074.137706885, 2824280.5845292266], [4550343.658682934, 2829902.3906195313], [4545265.574778739, 2830767.283864193], [4541203.107655383, 2834659.303465173], [4541964.820241012, 2836389.0899544978], [4548820.233511675, 2840497.3328666436], [4550343.658682934, 2846551.585579279], [4560245.922296114, 2849578.7119355965], [4560753.730686534, 2852822.06160308], [4572433.323666183, 2855200.518025901], [4575734.07820391, 2850443.605180259], [4579288.736936847, 2852389.614980749], [4585382.43762188, 2847632.7021351065], [4600362.785139257, 2851740.9450472523]]]}}, {"type": "Feature", "properties": {"id": "DE229", "na": "Regen", "AGS": "09276"}, "geometry": {"type": "Polygon", "coordinates": [[[4571163.802690134, 2879849.975498775], [4561515.443272164, 2877039.0724536227], [4562023.251662583, 2868173.916695835], [4555421.742587129, 2866227.9068953446], [4545519.478973948, 2867957.6933846693], [4541457.011850592, 2875093.0626531327], [4534347.694384719, 2873363.276163808], [4532824.26921346, 2875309.285964298], [4523175.909795489, 2892823.3741687085], [4534347.694384719, 2895418.053902695], [4537648.448922446, 2899093.8501925096], [4549835.850292515, 2893688.2674133703], [4552120.988049403, 2900607.4133706684], [4552628.796439822, 2899526.2968148408], [4552374.892244613, 2897364.063703185], [4554913.93419671, 2894985.6072803643], [4560499.826491324, 2894985.6072803643], [4569386.473323666, 2887634.014700735], [4571163.802690134, 2879849.975498775]]]}}, {"type": "Feature", "properties": {"id": "DE22A", "na": "Rottal-Inn", "AGS": "09277"}, "geometry": {"type": "Polygon", "coordinates": [[[4539933.586679334, 2837470.2065103254], [4541964.820241012, 2836389.0899544978], [4541203.107655383, 2834659.303465173], [4545265.574778739, 2830767.283864193], [4550343.658682934, 2829902.3906195313], [4549074.137706885, 2824280.5845292266], [4555929.550977549, 2816064.098704935], [4549328.041902095, 2811090.9625481274], [4554660.030001501, 2807847.612880644], [4556691.2635631785, 2802874.476723836], [4545519.478973948, 2798550.010500525], [4539933.586679334, 2792495.7577878893], [4530285.227261363, 2804171.8165908298], [4516828.304915246, 2806334.049702485], [4514289.262963148, 2807847.612880644], [4507941.658082904, 2814982.9821491074], [4504894.807740387, 2816064.098704935], [4503625.286764339, 2822334.5747287367], [4506418.232911645, 2824280.5845292266], [4509972.891644582, 2822118.351417571], [4510734.604230211, 2825794.147707385], [4519367.346867343, 2825361.7010850543], [4525461.047552377, 2829469.9439971996], [4526222.760138007, 2835740.4200210012], [4536378.927946397, 2837902.6531326566], [4539933.586679334, 2837470.2065103254]]]}}, {"type": "Feature", "properties": {"id": "DE22B", "na": "Straubing-Bogen", "AGS": "09278"}, "geometry": {"type": "Polygon", "coordinates": [[[4523175.909795489, 2892823.3741687085], [4532824.26921346, 2875309.285964298], [4529015.706285315, 2867957.6933846693], [4530031.323066153, 2862552.1106055304], [4524191.526576329, 2861903.4406720335], [4522922.00560028, 2859957.4308715435], [4524191.526576329, 2857578.9744487223], [4512004.12520626, 2848930.0420021], [4499816.723836192, 2853254.508225411], [4492453.5021751085, 2848065.148757438], [4477980.963048153, 2852605.8382919147], [4490676.172808641, 2863849.4504725235], [4495754.256712835, 2862335.8872943646], [4500070.628031401, 2869903.7031851592], [4499816.723836192, 2877255.295764788], [4503117.478373919, 2877255.295764788], [4502355.765788289, 2882877.1018550927], [4507687.753887694, 2889363.8011900596], [4521144.676233811, 2892823.3741687085], [4523175.909795489, 2892823.3741687085]], [[4516574.400720036, 2866444.1302065104], [4516320.496524826, 2869255.0332516627], [4508449.466473323, 2870552.3731186558], [4506418.232911645, 2868390.1400070004], [4502863.574178709, 2864930.567028351], [4507433.849692484, 2862335.8872943646], [4516574.400720036, 2866444.1302065104]]]}}, {"type": "Feature", "properties": {"id": "DE22C", "na": "Dingolfing-Landau", "AGS": "09279"}, "geometry": {"type": "Polygon", "coordinates": [[[4539933.586679334, 2837470.2065103254], [4536378.927946397, 2837902.6531326566], [4526222.760138007, 2835740.4200210012], [4525461.047552377, 2829469.9439971996], [4519367.346867343, 2825361.7010850543], [4510734.604230211, 2825794.147707385], [4509972.891644582, 2822118.351417571], [4506418.232911645, 2824280.5845292266], [4505148.711935597, 2830334.837241862], [4499055.011250563, 2828388.827441372], [4494484.735736786, 2831415.9537976896], [4494738.639931996, 2837470.2065103254], [4497785.490274513, 2839632.4396219812], [4492453.5021751085, 2848065.148757438], [4499816.723836192, 2853254.508225411], [4512004.12520626, 2848930.0420021], [4524191.526576329, 2857578.9744487223], [4526730.568528427, 2848497.595379769], [4537902.353117656, 2842010.896044802], [4539933.586679334, 2837470.2065103254]]]}}, {"type": "Feature", "properties": {"id": "DE231", "na": "Amberg, Kreisfreie Stadt", "AGS": "09361"}, "geometry": {"type": "Polygon", "coordinates": [[[4459953.765188259, 2927635.3272663634], [4454367.8728936445, 2923743.3076653834], [4450305.405770289, 2925473.0941547076], [4450051.501575079, 2929581.3370668534], [4456145.202260112, 2932392.2401120057], [4457922.531626581, 2931094.9002450122], [4459953.765188259, 2927635.3272663634]]]}}, {"type": "Feature", "properties": {"id": "DE232", "na": "Regensburg, Kreisfreie Stadt", "AGS": "09362"}, "geometry": {"type": "Polygon", "coordinates": [[[4480266.10080504, 2875741.732586629], [4472648.974948747, 2875309.285964298], [4469856.02880144, 2880066.1988099404], [4470617.741387069, 2883958.2184109204], [4476457.537876894, 2885904.2282114103], [4477473.154657733, 2886120.451522576], [4481281.717585879, 2879417.528876444], [4480266.10080504, 2875741.732586629]]]}}, {"type": "Feature", "properties": {"id": "DE233", "na": "Weiden i. d. Opf, Kreisfreie Stadt", "AGS": "09363"}, "geometry": {"type": "Polygon", "coordinates": [[[4475695.825291265, 2957257.920896045], [4484582.472123606, 2951852.3381169057], [4482297.334366718, 2949041.4350717533], [4477473.154657733, 2952284.784739237], [4474934.112705635, 2946879.201960098], [4469856.02880144, 2953365.901295065], [4473664.591729587, 2956393.0276513826], [4475695.825291265, 2957257.920896045]]]}}, {"type": "Feature", "properties": {"id": "DE234", "na": "Amberg-Sulzbach", "AGS": "09371"}, "geometry": {"type": "Polygon", "coordinates": [[[4474172.400120006, 2939527.6093804687], [4471125.549777489, 2937149.152957648], [4472648.974948747, 2932824.6867343364], [4468586.507825391, 2926121.764088204], [4464270.136506826, 2926770.434021701], [4466047.465873294, 2921797.2978648935], [4470871.645582279, 2921581.0745537276], [4470871.645582279, 2917689.0549527477], [4466301.370068504, 2916391.715085754], [4462492.807140357, 2909040.1225061254], [4461984.998749938, 2902769.646482324], [4460715.477773888, 2907526.5593279665], [4446242.938646932, 2915310.5985299265], [4439895.333766688, 2915094.375218761], [4439641.429571479, 2920932.404620231], [4434055.537276864, 2924175.754287714], [4436594.579228962, 2930230.00700035], [4430246.974348717, 2938878.939446972], [4435325.058252912, 2946230.532026601], [4434817.249862493, 2951419.891494575], [4433801.633081654, 2952717.231361568], [4433801.633081654, 2957906.5908295414], [4438371.90859543, 2962231.0570528526], [4439641.429571479, 2960933.7171858596], [4440910.9505475275, 2952717.231361568], [4439641.429571479, 2947744.0952047603], [4463508.423921196, 2949473.881694085], [4464016.232311616, 2943203.4056702834], [4474172.400120006, 2939527.6093804687]], [[4459953.765188259, 2927635.3272663634], [4457922.531626581, 2931094.9002450122], [4456145.202260112, 2932392.2401120057], [4450051.501575079, 2929581.3370668534], [4450305.405770289, 2925473.0941547076], [4454367.8728936445, 2923743.3076653834], [4459953.765188259, 2927635.3272663634]]]}}, {"type": "Feature", "properties": {"id": "DE235", "na": "Cham", "AGS": "09372"}, "geometry": {"type": "Polygon", "coordinates": [[[4511750.22101105, 2932608.463423171], [4521144.676233811, 2923959.530976549], [4522922.00560028, 2918770.1715085753], [4537140.640532026, 2917905.2782639135], [4552120.988049403, 2900607.4133706684], [4549835.850292515, 2893688.2674133703], [4537648.448922446, 2899093.8501925096], [4534347.694384719, 2895418.053902695], [4523175.909795489, 2892823.3741687085], [4521144.676233811, 2892823.3741687085], [4507687.753887694, 2889363.8011900596], [4502355.765788289, 2882877.1018550927], [4497023.777688884, 2885039.334966748], [4499055.011250563, 2885904.2282114103], [4497023.777688884, 2890228.694434722], [4490676.172808641, 2889147.577878894], [4489660.556027802, 2895850.500525026], [4492961.310565528, 2903850.763038152], [4492199.597979899, 2902120.9765488273], [4495246.448322416, 2901688.5299264966], [4497277.681884094, 2909905.015750787], [4501340.149007451, 2909688.792439622], [4503625.286764339, 2914445.705285264], [4501594.05320266, 2914878.1519075953], [4501340.149007451, 2923094.6377318865], [4505402.6161308065, 2930878.6769338464], [4511242.412620631, 2933257.133356668], [4511750.22101105, 2932608.463423171]]]}}, {"type": "Feature", "properties": {"id": "DE236", "na": "Neumarkt i. d. OPf.", "AGS": "09373"}, "geometry": {"type": "Polygon", "coordinates": [[[4434055.537276864, 2924175.754287714], [4439641.429571479, 2920932.404620231], [4439895.333766688, 2915094.375218761], [4446242.938646932, 2915310.5985299265], [4460715.477773888, 2907526.5593279665], [4461984.998749938, 2902769.646482324], [4462238.902945147, 2899958.743437172], [4445989.034451722, 2888498.9079453973], [4442434.375718785, 2879417.528876444], [4439133.621181059, 2878552.6356317815], [4438118.00440022, 2872282.1596079804], [4432024.303715186, 2880931.0920546027], [4433293.824691234, 2885255.558277914], [4425422.794639732, 2884606.8883444173], [4422375.944297215, 2886120.451522576], [4416790.052002599, 2896931.6170808543], [4413489.297464874, 2898012.733636682], [4412981.489074454, 2900607.4133706684], [4416536.14780739, 2900174.9667483373], [4415012.722636132, 2906877.8893944696], [4407395.596779839, 2910337.462373119], [4411711.968098405, 2913148.365418271], [4417551.764588229, 2910769.9089954495], [4421614.231711585, 2913580.812040602], [4426946.219810991, 2924391.97759888], [4434055.537276864, 2924175.754287714]]]}}, {"type": "Feature", "properties": {"id": "DE237", "na": "Neustadt a. d. Waldnaab", "AGS": "09374"}, "geometry": {"type": "Polygon", "coordinates": [[[4493976.927346367, 2963528.3969198456], [4497277.681884094, 2957474.1442072103], [4502863.574178709, 2955744.3577178856], [4508703.370668533, 2939960.0560028004], [4490168.364418221, 2935851.8130906546], [4480773.909195459, 2944068.2989149457], [4474172.400120006, 2939527.6093804687], [4464016.232311616, 2943203.4056702834], [4463508.423921196, 2949473.881694085], [4439641.429571479, 2947744.0952047603], [4440910.9505475275, 2952717.231361568], [4439641.429571479, 2960933.7171858596], [4438371.90859543, 2962231.0570528526], [4439387.525376269, 2967420.416520826], [4454367.8728936445, 2972177.3293664684], [4458430.340017, 2966987.969898495], [4464270.136506826, 2969798.872943647], [4470617.741387069, 2965690.630031502], [4477473.154657733, 2973690.892544627], [4482043.430171508, 2964609.5134756737], [4493976.927346367, 2963528.3969198456]], [[4475695.825291265, 2957257.920896045], [4473664.591729587, 2956393.0276513826], [4469856.02880144, 2953365.901295065], [4474934.112705635, 2946879.201960098], [4477473.154657733, 2952284.784739237], [4482297.334366718, 2949041.4350717533], [4484582.472123606, 2951852.3381169057], [4475695.825291265, 2957257.920896045]]]}}, {"type": "Feature", "properties": {"id": "DE238", "na": "Regensburg, Landkreis", "AGS": "09375"}, "geometry": {"type": "Polygon", "coordinates": [[[4489660.556027802, 2895850.500525026], [4490676.172808641, 2889147.577878894], [4497023.777688884, 2890228.694434722], [4499055.011250563, 2885904.2282114103], [4497023.777688884, 2885039.334966748], [4502355.765788289, 2882877.1018550927], [4503117.478373919, 2877255.295764788], [4499816.723836192, 2877255.295764788], [4500070.628031401, 2869903.7031851592], [4495754.256712835, 2862335.8872943646], [4490676.172808641, 2863849.4504725235], [4477980.963048153, 2852605.8382919147], [4475949.729486475, 2852389.614980749], [4475188.016900845, 2853254.508225411], [4475188.016900845, 2861903.4406720335], [4477473.154657733, 2864930.567028351], [4476457.537876894, 2867309.0234511727], [4472395.070753537, 2872282.1596079804], [4462492.807140357, 2874228.1694084704], [4457668.627431371, 2880282.4221211057], [4453098.351917596, 2880066.1988099404], [4450305.405770289, 2875957.955897795], [4442434.375718785, 2879417.528876444], [4445989.034451722, 2888498.9079453973], [4462238.902945147, 2899958.743437172], [4474172.400120006, 2894336.9373468673], [4479250.484024201, 2903418.3164158207], [4481027.813390669, 2899526.2968148408], [4484074.663733186, 2895850.500525026], [4489660.556027802, 2895850.500525026]], [[4480266.10080504, 2875741.732586629], [4481281.717585879, 2879417.528876444], [4477473.154657733, 2886120.451522576], [4476457.537876894, 2885904.2282114103], [4470617.741387069, 2883958.2184109204], [4469856.02880144, 2880066.1988099404], [4472648.974948747, 2875309.285964298], [4480266.10080504, 2875741.732586629]]]}}, {"type": "Feature", "properties": {"id": "DE239", "na": "Schwandorf", "AGS": "09376"}, "geometry": {"type": "Polygon", "coordinates": [[[4508703.370668533, 2939960.0560028004], [4512511.93359668, 2938014.0462023104], [4511750.22101105, 2932608.463423171], [4511242.412620631, 2933257.133356668], [4505402.6161308065, 2930878.6769338464], [4501340.149007451, 2923094.6377318865], [4501594.05320266, 2914878.1519075953], [4503625.286764339, 2914445.705285264], [4501340.149007451, 2909688.792439622], [4497277.681884094, 2909905.015750787], [4495246.448322416, 2901688.5299264966], [4492199.597979899, 2902120.9765488273], [4492961.310565528, 2903850.763038152], [4489660.556027802, 2895850.500525026], [4484074.663733186, 2895850.500525026], [4481027.813390669, 2899526.2968148408], [4479250.484024201, 2903418.3164158207], [4474172.400120006, 2894336.9373468673], [4462238.902945147, 2899958.743437172], [4461984.998749938, 2902769.646482324], [4462492.807140357, 2909040.1225061254], [4466301.370068504, 2916391.715085754], [4470871.645582279, 2917689.0549527477], [4470871.645582279, 2921581.0745537276], [4466047.465873294, 2921797.2978648935], [4464270.136506826, 2926770.434021701], [4468586.507825391, 2926121.764088204], [4472648.974948747, 2932824.6867343364], [4471125.549777489, 2937149.152957648], [4474172.400120006, 2939527.6093804687], [4480773.909195459, 2944068.2989149457], [4490168.364418221, 2935851.8130906546], [4508703.370668533, 2939960.0560028004]]]}}, {"type": "Feature", "properties": {"id": "DE23A", "na": "Tirschenreuth", "AGS": "09377"}, "geometry": {"type": "Polygon", "coordinates": [[[4504133.095154758, 2980177.591879594], [4498801.107055353, 2971961.1060553025], [4499055.011250563, 2966771.7465873295], [4493976.927346367, 2963528.3969198456], [4482043.430171508, 2964609.5134756737], [4477473.154657733, 2973690.892544627], [4470617.741387069, 2965690.630031502], [4464270.136506826, 2969798.872943647], [4458430.340017, 2966987.969898495], [4454367.8728936445, 2972177.3293664684], [4451067.118355918, 2984718.2814140706], [4457668.627431371, 2986880.5145257264], [4478488.771438572, 2989691.4175708788], [4482805.142757138, 2996394.340217011], [4484328.567928396, 2996178.1169058452], [4499562.819640982, 2988610.3010150506], [4498293.298664933, 2984285.8347917395], [4504133.095154758, 2980177.591879594]]]}}, {"type": "Feature", "properties": {"id": "DE241", "na": "Bamberg, Kreisfreie Stadt", "AGS": "09461"}, "geometry": {"type": "Polygon", "coordinates": [[[4389368.398919946, 2971961.1060553025], [4387591.069553478, 2970447.5428771437], [4380989.560478024, 2974555.7857892895], [4380735.656282814, 2978447.8053902695], [4384544.21921096, 2979096.4753237665], [4389114.494724736, 2976934.2422121107], [4389368.398919946, 2971961.1060553025]]]}}, {"type": "Feature", "properties": {"id": "DE242", "na": "Bayreuth, Kreisfreie Stadt", "AGS": "09462"}, "geometry": {"type": "Polygon", "coordinates": [[[4433039.920496024, 2985799.397969899], [4437102.387619381, 2985366.951347567], [4439641.429571479, 2985799.397969899], [4441164.8547427375, 2981691.1550577525], [4432786.016300815, 2976718.018900945], [4430754.782739136, 2981691.1550577525], [4433039.920496024, 2985799.397969899]]]}}, {"type": "Feature", "properties": {"id": "DE243", "na": "Coburg, Kreisfreie Stadt", "AGS": "09463"}, "geometry": {"type": "Polygon", "coordinates": [[[4396731.620581029, 3017584.2247112356], [4385813.74018701, 3014773.3216660833], [4384544.21921096, 3015854.438221911], [4385559.8359918, 3019746.457822891], [4388860.590529527, 3020827.5743787186], [4396731.620581029, 3017584.2247112356]]]}}, {"type": "Feature", "properties": {"id": "DE244", "na": "Hof, Kreisfreie Stadt", "AGS": "09464"}, "geometry": {"type": "Polygon", "coordinates": [[[4461477.190359518, 3024503.3706685333], [4456145.202260112, 3019314.0112005603], [4449797.597379869, 3023422.2541127056], [4456399.106455322, 3027746.7203360167], [4458430.340017, 3027314.2737136856], [4461477.190359518, 3024503.3706685333]]]}}, {"type": "Feature", "properties": {"id": "DE245", "na": "Bamberg, Landkreis", "AGS": "09471"}, "geometry": {"type": "Polygon", "coordinates": [[[4410442.447122356, 2987096.737836892], [4406633.88419421, 2982772.2716135806], [4406126.07580379, 2978015.3587679383], [4409934.638731936, 2973907.1158557925], [4409680.734536727, 2970231.3195659784], [4400794.087704385, 2970231.3195659784], [4398762.854142707, 2965258.1834091702], [4387844.973748688, 2962231.0570528526], [4377434.9017450875, 2961366.1638081903], [4372864.626231311, 2964177.0668533426], [4368294.350717535, 2956609.250962548], [4365501.404570228, 2958555.260763038], [4360677.224861243, 2960501.270563528], [4359661.608080404, 2964609.5134756737], [4354837.428371418, 2963960.843542177], [4353314.00320016, 2967852.863143157], [4354075.715785789, 2974123.3391669584], [4357376.470323516, 2973907.1158557925], [4370071.680084004, 2974555.7857892895], [4375657.572378619, 2984285.8347917395], [4374134.147207361, 2986880.5145257264], [4374895.85979299, 2990123.8641932094], [4380989.560478024, 2993367.213860693], [4382512.985649282, 2998124.126706335], [4384290.315015751, 2998340.350017501], [4384798.12340617, 2997691.680084004], [4385559.8359918, 2993150.990549527], [4392161.345067253, 2991204.980749037], [4405872.17160858, 2994664.5537276864], [4406887.788389419, 2993583.4371718587], [4403333.1296564825, 2990556.310815541], [4410442.447122356, 2987096.737836892]], [[4389368.398919946, 2971961.1060553025], [4389114.494724736, 2976934.2422121107], [4384544.21921096, 2979096.4753237665], [4380735.656282814, 2978447.8053902695], [4380989.560478024, 2974555.7857892895], [4387591.069553478, 2970447.5428771437], [4389368.398919946, 2971961.1060553025]]]}}, {"type": "Feature", "properties": {"id": "DE246", "na": "Bayreuth, Landkreis", "AGS": "09472"}, "geometry": {"type": "Polygon", "coordinates": [[[4449035.88479424, 3000502.5831291564], [4457668.627431371, 2986880.5145257264], [4451067.118355918, 2984718.2814140706], [4454367.8728936445, 2972177.3293664684], [4439387.525376269, 2967420.416520826], [4438371.90859543, 2962231.0570528526], [4433801.633081654, 2957906.5908295414], [4433801.633081654, 2952717.231361568], [4433547.728886444, 2948825.211760588], [4424153.273663683, 2945581.8620931045], [4419836.902345117, 2951419.891494575], [4418313.477173858, 2952284.784739237], [4419329.093954697, 2959420.1540077003], [4421106.423321166, 2960933.7171858596], [4419329.093954697, 2966555.5232761637], [4414504.914245712, 2966555.5232761637], [4411458.063903195, 2972393.552677634], [4412473.680684034, 2973258.445922296], [4409934.638731936, 2973907.1158557925], [4406126.07580379, 2978015.3587679383], [4406633.88419421, 2982772.2716135806], [4410442.447122356, 2987096.737836892], [4411204.159707986, 2988177.8543927195], [4420598.614930746, 2981474.931746587], [4423391.561078054, 2983853.3881694083], [4422883.752687634, 2987312.961148057], [4439133.621181059, 2993583.4371718587], [4440910.9505475275, 3002664.8162408117], [4442942.184109205, 3002664.8162408117], [4449035.88479424, 3000502.5831291564]], [[4433039.920496024, 2985799.397969899], [4430754.782739136, 2981691.1550577525], [4432786.016300815, 2976718.018900945], [4441164.8547427375, 2981691.1550577525], [4439641.429571479, 2985799.397969899], [4437102.387619381, 2985366.951347567], [4433039.920496024, 2985799.397969899]]]}}, {"type": "Feature", "properties": {"id": "DE247", "na": "Coburg, Landkreis", "AGS": "09473"}, "geometry": {"type": "Polygon", "coordinates": [[[4388352.782139107, 3030990.0700035], [4391145.728286414, 3026665.603780189], [4400286.279313966, 3028827.836891845], [4403587.033851692, 3024935.8172908644], [4401809.704485225, 3022989.8074903744], [4402317.512875644, 3020395.127756388], [4405872.17160858, 3018449.117955898], [4406633.88419421, 3016719.3314665733], [4404348.746437321, 3011097.5253762687], [4406633.88419421, 3010665.078753938], [4395969.907995399, 3011529.9719986], [4391399.632481623, 3011529.9719986], [4393176.961848092, 3008070.399019951], [4389368.398919946, 3007205.5057752887], [4384290.315015751, 2998340.350017501], [4382512.985649282, 2998124.126706335], [4381497.368868443, 3004178.379418971], [4376673.189159458, 3004394.6027301364], [4376673.189159458, 3009367.738886944], [4373118.530426521, 3013259.758487924], [4381751.273063653, 3017151.7780889045], [4371849.009450473, 3023422.2541127056], [4371849.009450473, 3028179.166958348], [4384036.410820541, 3031638.7399369967], [4388352.782139107, 3030990.0700035]], [[4396731.620581029, 3017584.2247112356], [4388860.590529527, 3020827.5743787186], [4385559.8359918, 3019746.457822891], [4384544.21921096, 3015854.438221911], [4385813.74018701, 3014773.3216660833], [4396731.620581029, 3017584.2247112356]]]}}, {"type": "Feature", "properties": {"id": "DE248", "na": "Forchheim", "AGS": "09474"}, "geometry": {"type": "Polygon", "coordinates": [[[4419836.902345117, 2951419.891494575], [4413489.297464874, 2944284.522226111], [4399524.566728337, 2943635.8522926145], [4395462.09960498, 2951419.891494575], [4388352.782139107, 2954663.241162058], [4387844.973748688, 2962231.0570528526], [4398762.854142707, 2965258.1834091702], [4400794.087704385, 2970231.3195659784], [4409680.734536727, 2970231.3195659784], [4409934.638731936, 2973907.1158557925], [4412473.680684034, 2973258.445922296], [4411458.063903195, 2972393.552677634], [4414504.914245712, 2966555.5232761637], [4419329.093954697, 2966555.5232761637], [4421106.423321166, 2960933.7171858596], [4419329.093954697, 2959420.1540077003], [4418313.477173858, 2952284.784739237], [4419836.902345117, 2951419.891494575]]]}}, {"type": "Feature", "properties": {"id": "DE249", "na": "Hof, Landkreis", "AGS": "09475"}, "geometry": {"type": "Polygon", "coordinates": [[[4470617.741387069, 3024935.8172908644], [4473410.687534377, 3020611.3510675533], [4470109.932996649, 3017800.448022401], [4475188.016900845, 3014340.875043752], [4470363.837191859, 3013908.428421421], [4449035.88479424, 3000502.5831291564], [4442942.184109205, 3002664.8162408117], [4440910.9505475275, 3002664.8162408117], [4438625.81279064, 3002448.5929296464], [4441672.6631331565, 3006773.0591529575], [4439387.525376269, 3013908.428421421], [4435071.154057703, 3013692.2051102556], [4436848.483424171, 3018016.6713335663], [4431008.686934346, 3018232.894644732], [4431516.495324766, 3028179.166958348], [4435071.154057703, 3033152.3031151555], [4448528.07640382, 3035530.759537977], [4450559.309965498, 3032503.633181659], [4457414.723236162, 3036395.652782639], [4459192.05260263, 3035746.9828491425], [4465793.561678084, 3026233.157157858], [4470617.741387069, 3024935.8172908644]], [[4461477.190359518, 3024503.3706685333], [4458430.340017, 3027314.2737136856], [4456399.106455322, 3027746.7203360167], [4449797.597379869, 3023422.2541127056], [4456145.202260112, 3019314.0112005603], [4461477.190359518, 3024503.3706685333]]]}}, {"type": "Feature", "properties": {"id": "DE24A", "na": "Kronach", "AGS": "09476"}, "geometry": {"type": "Polygon", "coordinates": [[[4426184.507225361, 3036611.876093805], [4429231.357567878, 3030341.4000700032], [4435071.154057703, 3033152.3031151555], [4431516.495324766, 3028179.166958348], [4431008.686934346, 3018232.894644732], [4416790.052002599, 3006124.389219461], [4406633.88419421, 3010665.078753938], [4404348.746437321, 3011097.5253762687], [4406633.88419421, 3016719.3314665733], [4405872.17160858, 3018449.117955898], [4410696.351317566, 3018881.5645782286], [4412473.680684034, 3028395.3902695132], [4409426.830341517, 3040720.11900595], [4410950.255512776, 3041585.0122506125], [4416282.24361218, 3046341.925096255], [4421868.135906795, 3045909.4784739236], [4423137.656882844, 3044179.6919845995], [4421614.231711585, 3043314.798739937], [4421868.135906795, 3037909.215960798], [4426184.507225361, 3036611.876093805]]]}}, {"type": "Feature", "properties": {"id": "DE24B", "na": "Kulmbach", "AGS": "09477"}, "geometry": {"type": "Polygon", "coordinates": [[[4440910.9505475275, 3002664.8162408117], [4439133.621181059, 2993583.4371718587], [4422883.752687634, 2987312.961148057], [4423391.561078054, 2983853.3881694083], [4420598.614930746, 2981474.931746587], [4411204.159707986, 2988177.8543927195], [4414504.914245712, 2992718.5439271964], [4414758.818440922, 3001367.4763738187], [4417551.764588229, 3002881.0395519775], [4416790.052002599, 3006124.389219461], [4431008.686934346, 3018232.894644732], [4436848.483424171, 3018016.6713335663], [4435071.154057703, 3013692.2051102556], [4439387.525376269, 3013908.428421421], [4441672.6631331565, 3006773.0591529575], [4438625.81279064, 3002448.5929296464], [4440910.9505475275, 3002664.8162408117]]]}}, {"type": "Feature", "properties": {"id": "DE24C", "na": "Lichtenfels", "AGS": "09478"}, "geometry": {"type": "Polygon", "coordinates": [[[4406633.88419421, 3010665.078753938], [4416790.052002599, 3006124.389219461], [4417551.764588229, 3002881.0395519775], [4414758.818440922, 3001367.4763738187], [4414504.914245712, 2992718.5439271964], [4411204.159707986, 2988177.8543927195], [4410442.447122356, 2987096.737836892], [4403333.1296564825, 2990556.310815541], [4406887.788389419, 2993583.4371718587], [4405872.17160858, 2994664.5537276864], [4392161.345067253, 2991204.980749037], [4385559.8359918, 2993150.990549527], [4384798.12340617, 2997691.680084004], [4384290.315015751, 2998340.350017501], [4389368.398919946, 3007205.5057752887], [4393176.961848092, 3008070.399019951], [4391399.632481623, 3011529.9719986], [4395969.907995399, 3011529.9719986], [4406633.88419421, 3010665.078753938]]]}}, {"type": "Feature", "properties": {"id": "DE24D", "na": "Wunsiedel i. Fichtelgebirge", "AGS": "09479"}, "geometry": {"type": "Polygon", "coordinates": [[[4482805.142757138, 2996394.340217011], [4478488.771438572, 2989691.4175708788], [4457668.627431371, 2986880.5145257264], [4449035.88479424, 3000502.5831291564], [4470363.837191859, 3013908.428421421], [4475188.016900845, 3014340.875043752], [4478742.675633782, 3008935.2922646133], [4478234.867243363, 3002232.369618481], [4483820.759537976, 2998556.5733286664], [4482805.142757138, 2996394.340217011]]]}}, {"type": "Feature", "properties": {"id": "DE251", "na": "Ansbach, Kreisfreie Stadt", "AGS": "09561"}, "geometry": {"type": "Polygon", "coordinates": [[[4368040.446522326, 2905148.102905145], [4367532.638131906, 2902553.4231711584], [4354075.715785789, 2908175.229261463], [4355345.236761838, 2912715.9187959395], [4360677.224861243, 2914229.481974099], [4363977.97939897, 2913580.812040602], [4368548.254912745, 2912067.248862443], [4365501.404570228, 2907959.005950297], [4368040.446522326, 2905148.102905145]]]}}, {"type": "Feature", "properties": {"id": "DE252", "na": "Erlangen, Kreisfreie Stadt", "AGS": "09562"}, "geometry": {"type": "Polygon", "coordinates": [[[4395462.09960498, 2936284.2597129857], [4392415.249262463, 2936500.483024151], [4388606.686334317, 2936068.0364018204], [4388606.686334317, 2936500.483024151], [4387591.069553478, 2947311.648582429], [4390384.015700785, 2946446.755337767], [4396985.524776239, 2944500.745537277], [4395462.09960498, 2936284.2597129857]]]}}, {"type": "Feature", "properties": {"id": "DE253", "na": "F\u00c3\u00bcrth, Kreisfreie Stadt", "AGS": "09563"}, "geometry": {"type": "Polygon", "coordinates": [[[4392923.057652882, 2925256.870843542], [4386829.356967848, 2928716.443822191], [4385813.74018701, 2931743.5701785088], [4388606.686334317, 2933040.9100455022], [4388606.686334317, 2936068.0364018204], [4392415.249262463, 2936500.483024151], [4395462.09960498, 2930013.783689184], [4392923.057652882, 2925256.870843542]]]}}, {"type": "Feature", "properties": {"id": "DE254", "na": "N\u00c3\u00bcrnberg, Kreisfreie Stadt", "AGS": "09564"}, "geometry": {"type": "Polygon", "coordinates": [[[4395462.09960498, 2936284.2597129857], [4397747.237361868, 2933040.9100455022], [4406379.979999, 2929797.5603780188], [4402825.3212660635, 2926121.764088204], [4407395.596779839, 2920499.9579978995], [4405872.17160858, 2920283.734686734], [4401555.800290015, 2920283.734686734], [4402063.608680434, 2916607.9383969195], [4399524.566728337, 2914661.9285964295], [4394954.291214561, 2917905.2782639135], [4393430.866043302, 2918553.9481974095], [4393176.961848092, 2919202.6181309065], [4395462.09960498, 2921581.0745537276], [4392923.057652882, 2925256.870843542], [4395462.09960498, 2930013.783689184], [4392415.249262463, 2936500.483024151], [4395462.09960498, 2936284.2597129857]]]}}, {"type": "Feature", "properties": {"id": "DE255", "na": "Schwabach, Kreisfreie Stadt", "AGS": "09565"}, "geometry": {"type": "Polygon", "coordinates": [[[4399524.566728337, 2914661.9285964295], [4400032.375118756, 2911851.025551277], [4394700.387019351, 2909472.5691284565], [4391907.440872043, 2912932.1421071053], [4391653.536676833, 2916607.9383969195], [4393430.866043302, 2918553.9481974095], [4394954.291214561, 2917905.2782639135], [4399524.566728337, 2914661.9285964295]]]}}, {"type": "Feature", "properties": {"id": "DE256", "na": "Ansbach, Landkreis", "AGS": "09571"}, "geometry": {"type": "Polygon", "coordinates": [[[4371595.105255263, 2925040.6475323765], [4384036.410820541, 2916175.491774589], [4383782.506625331, 2912067.248862443], [4386321.548577429, 2910986.1323066154], [4386829.356967848, 2904715.656282814], [4382005.177258863, 2898661.4035701784], [4377688.8059402965, 2898445.1802590126], [4368802.159107955, 2891309.8109905496], [4368294.350717535, 2886769.1214560727], [4371341.201060053, 2881795.985299265], [4368040.446522326, 2878336.4123206157], [4365247.500375018, 2878336.4123206157], [4361692.841642082, 2880282.4221211057], [4360931.129056453, 2877255.295764788], [4355345.236761838, 2877687.742387119], [4351028.8654432725, 2873795.722786139], [4339857.080854042, 2882877.1018550927], [4339349.272463623, 2886769.1214560727], [4336048.517925896, 2887201.568078404], [4339857.080854042, 2890661.1410570526], [4339095.3682684135, 2893039.5974798743], [4330208.721436072, 2898661.4035701784], [4329193.104655232, 2919202.6181309065], [4332747.763388169, 2920283.734686734], [4327923.583679184, 2926121.764088204], [4329700.913045652, 2928932.6671333564], [4338333.655682784, 2930013.783689184], [4342396.12280614, 2922229.744487224], [4355091.332566628, 2922445.96779839], [4358645.991299565, 2926554.2107105358], [4367024.829741487, 2923310.861043052], [4371595.105255263, 2925040.6475323765]], [[4368040.446522326, 2905148.102905145], [4365501.404570228, 2907959.005950297], [4368548.254912745, 2912067.248862443], [4363977.97939897, 2913580.812040602], [4360677.224861243, 2914229.481974099], [4355345.236761838, 2912715.9187959395], [4354075.715785789, 2908175.229261463], [4367532.638131906, 2902553.4231711584], [4368040.446522326, 2905148.102905145]]]}}, {"type": "Feature", "properties": {"id": "DE257", "na": "Erlangen-H\u00c3\u00b6chstadt", "AGS": "09572"}, "geometry": {"type": "Polygon", "coordinates": [[[4387844.973748688, 2962231.0570528526], [4388352.782139107, 2954663.241162058], [4395462.09960498, 2951419.891494575], [4399524.566728337, 2943635.8522926145], [4413489.297464874, 2944284.522226111], [4407141.692584629, 2939311.3860693034], [4406379.979999, 2929797.5603780188], [4397747.237361868, 2933040.9100455022], [4395462.09960498, 2936284.2597129857], [4396985.524776239, 2944500.745537277], [4390384.015700785, 2946446.755337767], [4387591.069553478, 2947311.648582429], [4388606.686334317, 2936500.483024151], [4386829.356967848, 2937149.152957648], [4379973.943697184, 2936284.2597129857], [4378450.518525926, 2941041.172558628], [4375657.572378619, 2942338.512425621], [4377434.9017450875, 2949690.1050052503], [4363977.97939897, 2953365.901295065], [4368294.350717535, 2956609.250962548], [4372864.626231311, 2964177.0668533426], [4377434.9017450875, 2961366.1638081903], [4387844.973748688, 2962231.0570528526]]]}}, {"type": "Feature", "properties": {"id": "DE258", "na": "F\u00c3\u00bcrth, Landkreis", "AGS": "09573"}, "geometry": {"type": "Polygon", "coordinates": [[[4388606.686334317, 2936500.483024151], [4388606.686334317, 2936068.0364018204], [4388606.686334317, 2933040.9100455022], [4385813.74018701, 2931743.5701785088], [4386829.356967848, 2928716.443822191], [4392923.057652882, 2925256.870843542], [4395462.09960498, 2921581.0745537276], [4393176.961848092, 2919202.6181309065], [4384036.410820541, 2916175.491774589], [4371595.105255263, 2925040.6475323765], [4370325.584279214, 2931527.3468673434], [4379973.943697184, 2936284.2597129857], [4386829.356967848, 2937149.152957648], [4388606.686334317, 2936500.483024151]]]}}, {"type": "Feature", "properties": {"id": "DE259", "na": "N\u00c3\u00bcrnberger Land", "AGS": "09574"}, "geometry": {"type": "Polygon", "coordinates": [[[4434055.537276864, 2924175.754287714], [4426946.219810991, 2924391.97759888], [4421614.231711585, 2913580.812040602], [4417551.764588229, 2910769.9089954495], [4411711.968098405, 2913148.365418271], [4405872.17160858, 2920283.734686734], [4407395.596779839, 2920499.9579978995], [4402825.3212660635, 2926121.764088204], [4406379.979999, 2929797.5603780188], [4407141.692584629, 2939311.3860693034], [4413489.297464874, 2944284.522226111], [4419836.902345117, 2951419.891494575], [4424153.273663683, 2945581.8620931045], [4433547.728886444, 2948825.211760588], [4433801.633081654, 2952717.231361568], [4434817.249862493, 2951419.891494575], [4435325.058252912, 2946230.532026601], [4430246.974348717, 2938878.939446972], [4436594.579228962, 2930230.00700035], [4434055.537276864, 2924175.754287714]]]}}, {"type": "Feature", "properties": {"id": "DE25A", "na": "Neustadt a. d. Aisch-Bad Windsheim", "AGS": "09575"}, "geometry": {"type": "Polygon", "coordinates": [[[4368294.350717535, 2956609.250962548], [4363977.97939897, 2953365.901295065], [4377434.9017450875, 2949690.1050052503], [4375657.572378619, 2942338.512425621], [4378450.518525926, 2941041.172558628], [4379973.943697184, 2936284.2597129857], [4370325.584279214, 2931527.3468673434], [4371595.105255263, 2925040.6475323765], [4367024.829741487, 2923310.861043052], [4358645.991299565, 2926554.2107105358], [4355091.332566628, 2922445.96779839], [4342396.12280614, 2922229.744487224], [4338333.655682784, 2930013.783689184], [4329700.913045652, 2928932.6671333564], [4327161.871093554, 2936716.7063353164], [4326400.158507925, 2942122.2891144557], [4328939.200460022, 2945365.638781939], [4333255.571778589, 2941906.0658032903], [4336048.517925896, 2946446.755337767], [4348997.631881594, 2946879.201960098], [4345442.973148657, 2954663.241162058], [4352298.3864193205, 2959852.6006300314], [4360677.224861243, 2960501.270563528], [4365501.404570228, 2958555.260763038], [4368294.350717535, 2956609.250962548]]]}}, {"type": "Feature", "properties": {"id": "DE25B", "na": "Roth", "AGS": "09576"}, "geometry": {"type": "Polygon", "coordinates": [[[4405872.17160858, 2920283.734686734], [4411711.968098405, 2913148.365418271], [4407395.596779839, 2910337.462373119], [4415012.722636132, 2906877.8893944696], [4416536.14780739, 2900174.9667483373], [4412981.489074454, 2900607.4133706684], [4413489.297464874, 2898012.733636682], [4416790.052002599, 2896931.6170808543], [4422375.944297215, 2886120.451522576], [4423899.369468473, 2881579.7619880997], [4418059.572978649, 2877039.0724536227], [4408919.021951098, 2882228.4319215957], [4393684.770238511, 2894120.714035702], [4389368.398919946, 2891309.8109905496], [4384798.12340617, 2893688.2674133703], [4382005.177258863, 2898661.4035701784], [4386829.356967848, 2904715.656282814], [4386321.548577429, 2910986.1323066154], [4383782.506625331, 2912067.248862443], [4384036.410820541, 2916175.491774589], [4393176.961848092, 2919202.6181309065], [4393430.866043302, 2918553.9481974095], [4391653.536676833, 2916607.9383969195], [4391907.440872043, 2912932.1421071053], [4394700.387019351, 2909472.5691284565], [4400032.375118756, 2911851.025551277], [4399524.566728337, 2914661.9285964295], [4402063.608680434, 2916607.9383969195], [4401555.800290015, 2920283.734686734], [4405872.17160858, 2920283.734686734]]]}}, {"type": "Feature", "properties": {"id": "DE25C", "na": "Wei\u00c3\u0178enburg-Gunzenhausen", "AGS": "09577"}, "geometry": {"type": "Polygon", "coordinates": [[[4408919.021951098, 2882228.4319215957], [4404602.650632531, 2873147.0528526427], [4398001.141557078, 2869255.0332516627], [4399524.566728337, 2867092.800140007], [4389876.2073103655, 2861470.994049703], [4380735.656282814, 2865579.236961848], [4382005.177258863, 2867309.0234511727], [4380989.560478024, 2870984.819740987], [4374134.147207361, 2865579.236961848], [4370833.392669633, 2866876.576828841], [4371341.201060053, 2872065.936296815], [4368040.446522326, 2874444.3927196357], [4368040.446522326, 2878336.4123206157], [4371341.201060053, 2881795.985299265], [4368294.350717535, 2886769.1214560727], [4368802.159107955, 2891309.8109905496], [4377688.8059402965, 2898445.1802590126], [4382005.177258863, 2898661.4035701784], [4384798.12340617, 2893688.2674133703], [4389368.398919946, 2891309.8109905496], [4393684.770238511, 2894120.714035702], [4408919.021951098, 2882228.4319215957]]]}}, {"type": "Feature", "properties": {"id": "DE261", "na": "Aschaffenburg, Kreisfreie Stadt", "AGS": "09661"}, "geometry": {"type": "Polygon", "coordinates": [[[4266224.864243212, 2980610.038501925], [4259115.546777339, 2979961.3685684283], [4256830.409020451, 2980177.591879594], [4255053.079653982, 2988826.5243262164], [4256576.504825241, 2989475.194259713], [4266224.864243212, 2980610.038501925]]]}}, {"type": "Feature", "properties": {"id": "DE262", "na": "Schweinfurt, Kreisfreie Stadt", "AGS": "09662"}, "geometry": {"type": "Polygon", "coordinates": [[[4340618.793439671, 2994015.8837941894], [4338841.4640732035, 2989475.194259713], [4332747.763388169, 2990988.757437872], [4337064.134706736, 2994880.7770388518], [4336810.230511526, 2997691.680084004], [4338841.4640732035, 2996826.7868393417], [4340618.793439671, 2994015.8837941894]]]}}, {"type": "Feature", "properties": {"id": "DE263", "na": "W\u00c3\u00bcrzburg, Kreisfreie Stadt", "AGS": "09663"}, "geometry": {"type": "Polygon", "coordinates": [[[4321829.88299415, 2965690.630031502], [4319798.649432471, 2955744.3577178856], [4312181.523576179, 2960068.8239411972], [4311927.619380969, 2967852.863143157], [4314212.757137856, 2968069.0864543226], [4315736.182309115, 2969798.872943647], [4321829.88299415, 2965690.630031502]]]}}, {"type": "Feature", "properties": {"id": "DE264", "na": "Aschaffenburg, Landkreis", "AGS": "09671"}, "geometry": {"type": "Polygon", "coordinates": [[[4278412.26561328, 2997475.4567728387], [4276888.840442022, 2993799.660483024], [4283744.253712686, 2981474.931746587], [4279935.690784539, 2978447.8053902695], [4279427.88239412, 2974555.7857892895], [4275619.319465973, 2969150.20301015], [4272064.660733037, 2969366.426321316], [4269271.714585729, 2977799.1354567725], [4266224.864243212, 2980610.038501925], [4256576.504825241, 2989475.194259713], [4255053.079653982, 2988826.5243262164], [4256830.409020451, 2980177.591879594], [4256068.696434822, 2973907.1158557925], [4252767.941897094, 2973042.22261113], [4250482.804140206, 2987096.737836892], [4252767.941897094, 2987096.737836892], [4251752.325116256, 2992286.0973048653], [4247689.8579929, 2993367.213860693], [4248705.4747737385, 2995529.4469723487], [4250736.708335416, 3000286.359817991], [4266478.768438422, 3003962.1561078057], [4276381.032051602, 3002016.146307315], [4278412.26561328, 2997475.4567728387]]]}}, {"type": "Feature", "properties": {"id": "DE265", "na": "Bad Kissingen", "AGS": "09672"}, "geometry": {"type": "Polygon", "coordinates": [[[4316497.894894745, 3034233.419670983], [4318021.320066003, 3030125.176758838], [4316243.990699535, 3025800.7105355267], [4319290.841042052, 3022773.5841792086], [4333001.667583379, 3016719.3314665733], [4344173.452172609, 3021260.0210010502], [4347474.206710335, 3013043.5351767587], [4344427.356367818, 3003962.1561078057], [4333763.380169008, 3004610.8260413017], [4329954.817240862, 2999637.689884494], [4321829.88299415, 2999637.689884494], [4318529.128456423, 2993583.4371718587], [4315736.182309115, 2990772.5341267064], [4307357.343867193, 2992718.5439271964], [4308880.769038452, 2997043.0101505076], [4298216.792839642, 3012827.3118655933], [4294154.325716286, 3013043.5351767587], [4302787.068353417, 3022124.9142457126], [4302025.355767788, 3027098.05040252], [4304818.301915096, 3034882.08960448], [4311165.90679534, 3031638.7399369967], [4316497.894894745, 3034233.419670983]]]}}, {"type": "Feature", "properties": {"id": "DE266", "na": "Rh\u00c3\u00b6n-Grabfeld", "AGS": "09673"}, "geometry": {"type": "Polygon", "coordinates": [[[4353060.09900495, 3032287.409870493], [4356106.949347467, 3027098.05040252], [4363724.07520376, 3024719.5939796986], [4363216.266813341, 3017800.448022401], [4364485.7877893895, 3013043.5351767587], [4360169.416470824, 3012394.865243262], [4357630.374518726, 3013908.428421421], [4353060.09900495, 3009583.96219811], [4348997.631881594, 3013043.5351767587], [4347474.206710335, 3013043.5351767587], [4344173.452172609, 3021260.0210010502], [4333001.667583379, 3016719.3314665733], [4319290.841042052, 3022773.5841792086], [4316243.990699535, 3025800.7105355267], [4318021.320066003, 3030125.176758838], [4316497.894894745, 3034233.419670983], [4322337.691384569, 3039422.779138957], [4323861.116555828, 3045044.5852292613], [4329954.817240862, 3049801.4980749036], [4344427.356367818, 3042449.905495275], [4348997.631881594, 3031638.7399369967], [4353060.09900495, 3032287.409870493]]]}}, {"type": "Feature", "properties": {"id": "DE267", "na": "Ha\u00c3\u0178berge", "AGS": "09674"}, "geometry": {"type": "Polygon", "coordinates": [[[4364485.7877893895, 3013043.5351767587], [4372102.913645682, 3010448.855442772], [4373118.530426521, 3013259.758487924], [4376673.189159458, 3009367.738886944], [4376673.189159458, 3004394.6027301364], [4381497.368868443, 3004178.379418971], [4382512.985649282, 2998124.126706335], [4380989.560478024, 2993367.213860693], [4374895.85979299, 2990123.8641932094], [4374134.147207361, 2986880.5145257264], [4375657.572378619, 2984285.8347917395], [4370071.680084004, 2974555.7857892895], [4357376.470323516, 2973907.1158557925], [4353821.811590579, 2975853.1256562825], [4357376.470323516, 2976501.7955897795], [4357884.278713936, 2980177.591879594], [4343919.547977399, 2990772.5341267064], [4352044.4822241105, 2995961.8935946794], [4349251.536076804, 2999205.2432621634], [4353060.09900495, 3009583.96219811], [4357630.374518726, 3013908.428421421], [4360169.416470824, 3012394.865243262], [4364485.7877893895, 3013043.5351767587]]]}}, {"type": "Feature", "properties": {"id": "DE268", "na": "Kitzingen", "AGS": "09675"}, "geometry": {"type": "Polygon", "coordinates": [[[4353314.00320016, 2967852.863143157], [4354837.428371418, 2963960.843542177], [4359661.608080404, 2964609.5134756737], [4360677.224861243, 2960501.270563528], [4352298.3864193205, 2959852.6006300314], [4345442.973148657, 2954663.241162058], [4348997.631881594, 2946879.201960098], [4336048.517925896, 2946446.755337767], [4333255.571778589, 2941906.0658032903], [4328939.200460022, 2945365.638781939], [4326907.966898344, 2948392.765138257], [4330208.721436072, 2952717.231361568], [4323861.116555828, 2959420.1540077003], [4325638.4459222965, 2968069.0864543226], [4332747.763388169, 2970663.7661883095], [4332747.763388169, 2973907.1158557925], [4334525.092754638, 2975420.679033952], [4338079.751487575, 2976285.572278614], [4353314.00320016, 2967852.863143157]]]}}, {"type": "Feature", "properties": {"id": "DE269", "na": "Miltenberg", "AGS": "09676"}, "geometry": {"type": "Polygon", "coordinates": [[[4279427.88239412, 2974555.7857892895], [4282982.541127056, 2963095.950297515], [4271810.756537827, 2962014.8337416872], [4270287.331366569, 2958987.707385369], [4274603.7026851345, 2954879.4644732233], [4277650.553027651, 2957474.1442072103], [4279427.88239412, 2953798.3479173956], [4277650.553027651, 2950987.4448722433], [4278412.26561328, 2950338.774938747], [4270795.139756988, 2949473.881694085], [4265970.960048002, 2941257.3958697934], [4256068.696434822, 2940824.9492474627], [4254799.175458773, 2943635.8522926145], [4255306.983849192, 2953365.901295065], [4259877.259362968, 2959203.930696535], [4251752.325116256, 2970879.989499475], [4252767.941897094, 2973042.22261113], [4256068.696434822, 2973907.1158557925], [4256830.409020451, 2980177.591879594], [4259115.546777339, 2979961.3685684283], [4266224.864243212, 2980610.038501925], [4269271.714585729, 2977799.1354567725], [4272064.660733037, 2969366.426321316], [4275619.319465973, 2969150.20301015], [4279427.88239412, 2974555.7857892895]]]}}, {"type": "Feature", "properties": {"id": "DE26A", "na": "Main-Spessart", "AGS": "09677"}, "geometry": {"type": "Polygon", "coordinates": [[[4294154.325716286, 3013043.5351767587], [4298216.792839642, 3012827.3118655933], [4308880.769038452, 2997043.0101505076], [4307357.343867193, 2992718.5439271964], [4315736.182309115, 2990772.5341267064], [4318529.128456423, 2993583.4371718587], [4323861.116555828, 2991204.980749037], [4323099.403970199, 2982123.601680084], [4317767.415870793, 2980610.038501925], [4315990.086504325, 2975636.902345117], [4308880.769038452, 2975853.1256562825], [4301263.6431821585, 2968933.979698985], [4297201.176058803, 2969150.20301015], [4295677.750887545, 2964393.290164508], [4282982.541127056, 2963095.950297515], [4279427.88239412, 2974555.7857892895], [4279935.690784539, 2978447.8053902695], [4283744.253712686, 2981474.931746587], [4276888.840442022, 2993799.660483024], [4278412.26561328, 2997475.4567728387], [4286537.199859993, 2999421.4665733287], [4285013.774688735, 3012827.3118655933], [4286283.295664784, 3013692.2051102556], [4294154.325716286, 3013043.5351767587]]]}}, {"type": "Feature", "properties": {"id": "DE26B", "na": "Schweinfurt, Landkreis", "AGS": "09678"}, "geometry": {"type": "Polygon", "coordinates": [[[4353060.09900495, 3009583.96219811], [4349251.536076804, 2999205.2432621634], [4352044.4822241105, 2995961.8935946794], [4343919.547977399, 2990772.5341267064], [4357884.278713936, 2980177.591879594], [4357376.470323516, 2976501.7955897795], [4353821.811590579, 2975853.1256562825], [4357376.470323516, 2973907.1158557925], [4354075.715785789, 2974123.3391669584], [4353314.00320016, 2967852.863143157], [4338079.751487575, 2976285.572278614], [4334525.092754638, 2975420.679033952], [4325892.3501175055, 2979961.3685684283], [4323099.403970199, 2982123.601680084], [4323861.116555828, 2991204.980749037], [4318529.128456423, 2993583.4371718587], [4321829.88299415, 2999637.689884494], [4329954.817240862, 2999637.689884494], [4333763.380169008, 3004610.8260413017], [4344427.356367818, 3003962.1561078057], [4347474.206710335, 3013043.5351767587], [4348997.631881594, 3013043.5351767587], [4353060.09900495, 3009583.96219811]], [[4340618.793439671, 2994015.8837941894], [4338841.4640732035, 2996826.7868393417], [4336810.230511526, 2997691.680084004], [4337064.134706736, 2994880.7770388518], [4332747.763388169, 2990988.757437872], [4338841.4640732035, 2989475.194259713], [4340618.793439671, 2994015.8837941894]]]}}, {"type": "Feature", "properties": {"id": "DE26C", "na": "W\u00c3\u00bcrzburg, Landkreis", "AGS": "09679"}, "geometry": {"type": "Polygon", "coordinates": [[[4334525.092754638, 2975420.679033952], [4332747.763388169, 2973907.1158557925], [4332747.763388169, 2970663.7661883095], [4325638.4459222965, 2968069.0864543226], [4323861.116555828, 2959420.1540077003], [4330208.721436072, 2952717.231361568], [4326907.966898344, 2948392.765138257], [4328939.200460022, 2945365.638781939], [4326400.158507925, 2942122.2891144557], [4327161.871093554, 2936716.7063353164], [4323607.212360618, 2935203.143157158], [4324876.733336667, 2933473.3566678334], [4322591.595579779, 2930446.2303115157], [4315736.182309115, 2930230.00700035], [4314974.469723486, 2941041.172558628], [4311927.619380969, 2940608.725936297], [4308880.769038452, 2954663.241162058], [4300248.0264013205, 2957257.920896045], [4294408.229911495, 2953365.901295065], [4295931.655082754, 2963095.950297515], [4295677.750887545, 2964393.290164508], [4297201.176058803, 2969150.20301015], [4301263.6431821585, 2968933.979698985], [4308880.769038452, 2975853.1256562825], [4315990.086504325, 2975636.902345117], [4317767.415870793, 2980610.038501925], [4323099.403970199, 2982123.601680084], [4325892.3501175055, 2979961.3685684283], [4334525.092754638, 2975420.679033952]], [[4321829.88299415, 2965690.630031502], [4315736.182309115, 2969798.872943647], [4314212.757137856, 2968069.0864543226], [4311927.619380969, 2967852.863143157], [4312181.523576179, 2960068.8239411972], [4319798.649432471, 2955744.3577178856], [4321829.88299415, 2965690.630031502]]]}}, {"type": "Feature", "properties": {"id": "DE137", "na": "Tuttlingen", "AGS": "08327"}, "geometry": {"type": "Polygon", "coordinates": [[[4243119.582479124, 2777576.349317466], [4246166.432821641, 2773251.8830941548], [4247943.76218811, 2763305.610780539], [4247182.04960248, 2758548.6979348967], [4237279.785989299, 2755954.0182009097], [4234486.839841992, 2752278.2219110955], [4225092.38461923, 2753791.7850892544], [4223061.151057553, 2749683.542177109], [4219252.588129407, 2749899.7654882744], [4215444.02520126, 2755737.7948897444], [4215444.02520126, 2760062.2611130555], [4221029.917495875, 2762873.164158208], [4219252.588129407, 2771738.319915996], [4216967.450372519, 2774549.2229611482], [4228139.234961748, 2783630.602030101], [4229408.755937797, 2786225.281764088], [4234232.935646782, 2784279.271963598], [4238041.498574928, 2777576.349317466], [4243119.582479124, 2777576.349317466]]]}}, {"type": "Feature", "properties": {"id": "DE138", "na": "Konstanz", "AGS": "08335"}, "geometry": {"type": "Polygon", "coordinates": [[[4255814.792239612, 2748602.425621281], [4248451.570578529, 2744061.7360868044], [4259115.546777339, 2735845.250262513], [4262162.3971198555, 2728277.434371718], [4259623.355167758, 2727196.3178158905], [4246928.145407271, 2730655.89079454], [4236518.0734036695, 2727628.764438222], [4234232.935646782, 2733899.240462023], [4231439.989499475, 2736710.143507175], [4228900.947547377, 2734547.91039552], [4230424.372718636, 2729790.9975498775], [4225346.28881444, 2731737.0073503675], [4226361.90559528, 2738439.9299965], [4216967.450372519, 2744061.7360868044], [4219252.588129407, 2749899.7654882744], [4223061.151057553, 2749683.542177109], [4225092.38461923, 2753791.7850892544], [4234486.839841992, 2752278.2219110955], [4237279.785989299, 2755954.0182009097], [4247182.04960248, 2758548.6979348967], [4252514.037701885, 2758764.921246062], [4251244.516725836, 2756170.2415120755], [4257592.12160608, 2753791.7850892544], [4255814.792239612, 2748602.425621281]]]}}, {"type": "Feature", "properties": {"id": "DE139", "na": "L\u00c3\u00b6rrach", "AGS": "08336"}, "geometry": {"type": "Polygon", "coordinates": [[[4172534.2162108105, 2749467.3188659432], [4168725.653282664, 2740385.93979699], [4169233.4616730837, 2733250.5705285263], [4161108.5274263714, 2726980.094504725], [4162631.9525976297, 2721358.2884144206], [4148667.2218610933, 2716601.3755687783], [4142827.4253712688, 2719196.055302765], [4147143.7966898344, 2720277.171858593], [4145874.2757137856, 2722006.9583479175], [4147397.7008850444, 2723520.5215260764], [4139526.6708335415, 2722439.404970248], [4134702.4911245564, 2731304.5607280363], [4134194.6827341365, 2734547.91039552], [4136987.628881444, 2739737.269863493], [4139526.6708335415, 2742980.6195309767], [4142573.521176059, 2741034.6097304868], [4155268.730936547, 2745575.2992649633], [4163139.760988049, 2754008.0084004197], [4169487.365868293, 2752494.4452222614], [4172534.2162108105, 2752061.9985999297], [4172534.2162108105, 2749467.3188659432]]]}}, {"type": "Feature", "properties": {"id": "DE13A", "na": "Waldshut", "AGS": "08337"}, "geometry": {"type": "Polygon", "coordinates": [[[4209350.324516226, 2741467.0563528175], [4206303.474173709, 2739953.4931746586], [4201225.390269513, 2730223.4441722087], [4206303.474173709, 2726547.647882394], [4216205.737786889, 2729358.5509275463], [4215444.02520126, 2722223.181659083], [4212904.983249162, 2721790.7350367517], [4213412.791639581, 2723736.7448372417], [4209858.132906646, 2725466.5313265664], [4204780.04900245, 2722223.181659083], [4207572.995149758, 2719844.7252362617], [4202494.911245562, 2718331.162058103], [4187260.6595329763, 2723952.9681484075], [4171772.5036251815, 2717250.045502275], [4164155.377768888, 2717033.8221911094], [4162631.9525976297, 2721358.2884144206], [4161108.5274263714, 2726980.094504725], [4169233.4616730837, 2733250.5705285263], [4168725.653282664, 2740385.93979699], [4172534.2162108105, 2749467.3188659432], [4177104.491724586, 2750115.9887994397], [4178627.916895845, 2745359.0759537974], [4184721.617580879, 2742764.396219811], [4191323.126656333, 2750332.2121106056], [4204018.336416821, 2750115.9887994397], [4209096.420321016, 2747521.3090654532], [4210873.749687484, 2742980.6195309767], [4209350.324516226, 2741467.0563528175]]]}}, {"type": "Feature", "properties": {"id": "DE141", "na": "Reutlingen", "AGS": "08415"}, "geometry": {"type": "Polygon", "coordinates": [[[4290091.858592929, 2825145.477773889], [4290345.762788139, 2824929.254462723], [4291107.475373768, 2818226.331816591], [4294154.325716286, 2812388.3024151204], [4282982.541127056, 2791198.417920896], [4282474.732736637, 2787738.844942247], [4275873.223661182, 2787090.1750087505], [4272572.469123457, 2792063.311165558], [4268510.0020001, 2797036.447322366], [4262670.205510275, 2797036.447322366], [4260638.971948598, 2796604.000700035], [4258861.642582129, 2800279.79698985], [4262416.3013150655, 2799631.127056353], [4263178.013900695, 2802874.476723836], [4256576.504825241, 2806982.719635982], [4256830.409020451, 2832280.847042352], [4258353.83419171, 2832713.293664683], [4261146.780339017, 2831848.4004200213], [4271302.948147407, 2825577.9243962197], [4290091.858592929, 2825145.477773889]]]}}, {"type": "Feature", "properties": {"id": "DE142", "na": "T\u00c3\u00bcbingen, Landkreis", "AGS": "08416"}, "geometry": {"type": "Polygon", "coordinates": [[[4256830.409020451, 2832280.847042352], [4256576.504825241, 2806982.719635982], [4237533.690184509, 2810874.739236962], [4230170.468523426, 2812172.079103955], [4229916.564328216, 2814550.535526776], [4233979.031451573, 2817361.4385719285], [4228900.947547377, 2821902.128106405], [4229916.564328216, 2823848.137906895], [4234994.648232412, 2821685.9047952397], [4239057.115355767, 2828605.0507525373], [4255814.792239612, 2833794.4102205113], [4256830.409020451, 2832280.847042352]]]}}, {"type": "Feature", "properties": {"id": "DE143", "na": "Zollernalbkreis", "AGS": "08417"}, "geometry": {"type": "Polygon", "coordinates": [[[4256576.504825241, 2806982.719635982], [4263178.013900695, 2802874.476723836], [4262416.3013150655, 2799631.127056353], [4258861.642582129, 2800279.79698985], [4260638.971948598, 2796604.000700035], [4254799.175458773, 2793576.8743437175], [4260385.067753388, 2788819.961498075], [4260638.971948598, 2784495.4952747636], [4258607.73838692, 2780603.4756737836], [4248959.3789689485, 2784063.048652433], [4243119.582479124, 2777576.349317466], [4238041.498574928, 2777576.349317466], [4234232.935646782, 2784279.271963598], [4229408.755937797, 2786225.281764088], [4228139.234961748, 2783630.602030101], [4223315.0552527625, 2797252.6706335316], [4227885.330766538, 2804820.4865243263], [4227377.522376118, 2808063.8361918097], [4230170.468523426, 2812172.079103955], [4237533.690184509, 2810874.739236962], [4256576.504825241, 2806982.719635982]]]}}, {"type": "Feature", "properties": {"id": "DE144", "na": "Ulm, Stadtkreis", "AGS": "08421"}, "geometry": {"type": "Polygon", "coordinates": [[[4323353.308165409, 2816064.098704935], [4324115.020751038, 2812820.749037452], [4320052.553627681, 2806334.049702485], [4320814.266213311, 2804171.8165908298], [4315228.373918695, 2799847.350367518], [4314212.757137856, 2800712.2436121805], [4315482.278113905, 2803090.7000350016], [4309388.577428872, 2805252.9331466574], [4319544.745237262, 2816712.768638432], [4323353.308165409, 2816064.098704935]]]}}, {"type": "Feature", "properties": {"id": "DE145", "na": "Alb-Donau-Kreis", "AGS": "08425"}, "geometry": {"type": "Polygon", "coordinates": [[[4338079.751487575, 2821902.128106405], [4338841.4640732035, 2819956.118305915], [4330970.434021701, 2815631.6520826044], [4329700.913045652, 2818010.108505425], [4323353.308165409, 2816064.098704935], [4319544.745237262, 2816712.768638432], [4309388.577428872, 2805252.9331466574], [4315482.278113905, 2803090.7000350016], [4314212.757137856, 2800712.2436121805], [4315228.373918695, 2799847.350367518], [4320814.266213311, 2804171.8165908298], [4325892.3501175055, 2796387.7773888693], [4328177.487874393, 2783414.378718936], [4321575.97879894, 2781900.815540777], [4326146.2543127155, 2786225.281764088], [4320306.457822891, 2794225.5442772135], [4313197.1403570175, 2797685.117255863], [4303548.780939046, 2790333.5246762335], [4302025.355767788, 2784711.7185859294], [4288568.433421671, 2786441.5050752535], [4282982.541127056, 2791198.417920896], [4294154.325716286, 2812388.3024151204], [4291107.475373768, 2818226.331816591], [4290345.762788139, 2824929.254462723], [4297201.176058803, 2823415.6912845643], [4301009.738986949, 2827740.157507875], [4307611.248062403, 2827307.7108855443], [4316751.799089954, 2835307.9733986696], [4317513.511675583, 2834875.526776339], [4338079.751487575, 2821902.128106405]]]}}, {"type": "Feature", "properties": {"id": "DE146", "na": "Biberach", "AGS": "08426"}, "geometry": {"type": "Polygon", "coordinates": [[[4328177.487874393, 2783414.378718936], [4331224.338216911, 2777143.9026951347], [4331224.338216911, 2767846.300315016], [4330970.434021701, 2766981.4070703536], [4329700.913045652, 2762440.7175358767], [4328685.296264813, 2762224.4942247113], [4323353.308165409, 2759197.3678683937], [4313704.948747437, 2763521.8340917043], [4305326.110305515, 2760062.2611130555], [4298724.601230062, 2763305.610780539], [4293138.708935447, 2761359.600980049], [4291615.283764188, 2765467.8438921943], [4285775.487274364, 2772603.2131606583], [4272826.373318666, 2775846.5628281413], [4267748.289414471, 2781468.368918446], [4269525.618780939, 2790117.301365068], [4272572.469123457, 2792063.311165558], [4275873.223661182, 2787090.1750087505], [4282474.732736637, 2787738.844942247], [4282982.541127056, 2791198.417920896], [4288568.433421671, 2786441.5050752535], [4302025.355767788, 2784711.7185859294], [4303548.780939046, 2790333.5246762335], [4313197.1403570175, 2797685.117255863], [4320306.457822891, 2794225.5442772135], [4326146.2543127155, 2786225.281764088], [4321575.97879894, 2781900.815540777], [4328177.487874393, 2783414.378718936]]]}}, {"type": "Feature", "properties": {"id": "DE147", "na": "Bodenseekreis", "AGS": "08435"}, "geometry": {"type": "Polygon", "coordinates": [[[4276634.936246812, 2745575.2992649633], [4279681.786589329, 2746007.7458872944], [4280951.307565378, 2739088.5999299968], [4283490.349517476, 2735629.0269513475], [4300501.9305965295, 2729790.9975498775], [4301517.547377368, 2725898.9779488975], [4297708.984449223, 2724817.86139307], [4297962.888644433, 2722006.9583479175], [4287806.7208360415, 2714439.142457123], [4282982.541127056, 2715520.2590129506], [4275365.415270763, 2723088.074903745], [4259623.355167758, 2727196.3178158905], [4262162.3971198555, 2728277.434371718], [4259115.546777339, 2735845.250262513], [4248451.570578529, 2744061.7360868044], [4255814.792239612, 2748602.425621281], [4260385.067753388, 2747737.532376619], [4266478.768438422, 2752061.9985999297], [4276634.936246812, 2745575.2992649633]]]}}, {"type": "Feature", "properties": {"id": "DE148", "na": "Ravensburg", "AGS": "08436"}, "geometry": {"type": "Polygon", "coordinates": [[[4291615.283764188, 2765467.8438921943], [4293138.708935447, 2761359.600980049], [4298724.601230062, 2763305.610780539], [4305326.110305515, 2760062.2611130555], [4313704.948747437, 2763521.8340917043], [4323353.308165409, 2759197.3678683937], [4328685.296264813, 2762224.4942247113], [4329193.104655232, 2758116.2513125655], [4328685.296264813, 2750115.9887994397], [4330970.434021701, 2745142.852642632], [4325892.3501175055, 2741467.0563528175], [4331478.24241212, 2732169.4539726987], [4326907.966898344, 2725034.084704235], [4325384.5417270865, 2729574.774238712], [4323099.403970199, 2729358.5509275463], [4318529.128456423, 2726763.87119356], [4308880.769038452, 2729358.5509275463], [4297962.888644433, 2722006.9583479175], [4297708.984449223, 2724817.86139307], [4301517.547377368, 2725898.9779488975], [4300501.9305965295, 2729790.9975498775], [4283490.349517476, 2735629.0269513475], [4280951.307565378, 2739088.5999299968], [4279681.786589329, 2746007.7458872944], [4276634.936246812, 2745575.2992649633], [4274349.7984899245, 2751845.7752887644], [4277904.457222861, 2761143.3776688837], [4286283.295664784, 2761792.04760238], [4288314.529226461, 2765684.06720336], [4291615.283764188, 2765467.8438921943]]]}}, {"type": "Feature", "properties": {"id": "DE149", "na": "Sigmaringen", "AGS": "08437"}, "geometry": {"type": "Polygon", "coordinates": [[[4272572.469123457, 2792063.311165558], [4269525.618780939, 2790117.301365068], [4267748.289414471, 2781468.368918446], [4272826.373318666, 2775846.5628281413], [4285775.487274364, 2772603.2131606583], [4291615.283764188, 2765467.8438921943], [4288314.529226461, 2765684.06720336], [4286283.295664784, 2761792.04760238], [4277904.457222861, 2761143.3776688837], [4274349.7984899245, 2751845.7752887644], [4276634.936246812, 2745575.2992649633], [4266478.768438422, 2752061.9985999297], [4260385.067753388, 2747737.532376619], [4255814.792239612, 2748602.425621281], [4257592.12160608, 2753791.7850892544], [4251244.516725836, 2756170.2415120755], [4252514.037701885, 2758764.921246062], [4247182.04960248, 2758548.6979348967], [4247943.76218811, 2763305.610780539], [4246166.432821641, 2773251.8830941548], [4243119.582479124, 2777576.349317466], [4248959.3789689485, 2784063.048652433], [4258607.73838692, 2780603.4756737836], [4260638.971948598, 2784495.4952747636], [4260385.067753388, 2788819.961498075], [4254799.175458773, 2793576.8743437175], [4260638.971948598, 2796604.000700035], [4262670.205510275, 2797036.447322366], [4268510.0020001, 2797036.447322366], [4272572.469123457, 2792063.311165558]]]}}, {"type": "Feature", "properties": {"id": "DE211", "na": "Ingolstadt, Kreisfreie Stadt", "AGS": "09161"}, "geometry": {"type": "Polygon", "coordinates": [[[4430500.878543927, 2849146.265313266], [4426438.411420571, 2843956.905845292], [4422122.040102005, 2842875.7892894642], [4413235.393269664, 2852605.8382919147], [4422883.752687634, 2853038.284914246], [4424407.177858893, 2856930.304515226], [4431262.591129556, 2853470.7315365765], [4430500.878543927, 2849146.265313266]]]}}, {"type": "Feature", "properties": {"id": "DE212", "na": "M\u00c3\u00bcnchen, Kreisfreie Stadt", "AGS": "09162"}, "geometry": {"type": "Polygon", "coordinates": [[[4426184.507225361, 2780387.252362618], [4422375.944297215, 2783630.602030101], [4425422.794639732, 2788819.961498075], [4432532.112105605, 2793793.097654883], [4434309.441472074, 2793144.427721386], [4442688.279913995, 2791630.864543227], [4442180.4715235755, 2786441.5050752535], [4449289.788989449, 2781900.815540777], [4446750.747037352, 2775197.8928946448], [4439133.621181059, 2776927.679383969], [4433547.728886444, 2773251.8830941548], [4430754.782739136, 2775414.1162058106], [4429993.070153507, 2780603.4756737836], [4426184.507225361, 2780387.252362618]]]}}, {"type": "Feature", "properties": {"id": "DE213", "na": "Rosenheim, Kreisfreie Stadt", "AGS": "09163"}, "geometry": {"type": "Polygon", "coordinates": [[[4482043.430171508, 2749683.542177109], [4480520.00500025, 2746872.6391319567], [4474934.112705635, 2747088.862443122], [4476457.537876894, 2752278.2219110955], [4481027.813390669, 2754872.901645082], [4480773.909195459, 2753359.338466923], [4482043.430171508, 2749683.542177109]]]}}, {"type": "Feature", "properties": {"id": "DE80O", "na": "Ludwigslust-Parchim", "AGS": "13076"}, "geometry": {"type": "Polygon", "coordinates": [[[4439387.525376269, 3408515.971298565], [4451828.830941547, 3405705.068253413], [4458430.340017, 3395542.5726286313], [4466301.370068504, 3394893.9026951347], [4467316.9868493425, 3390569.4364718236], [4473664.591729587, 3386893.640182009], [4472902.879143957, 3381271.8340917043], [4475695.825291265, 3376947.3678683937], [4472395.070753537, 3365919.9789989498], [4477219.250462523, 3360946.842842142], [4476457.537876894, 3359217.0563528175], [4475949.729486475, 3359433.279663983], [4459192.05260263, 3364406.415820791], [4457160.819040952, 3364406.415820791], [4457922.531626581, 3362027.95939797], [4455637.393869693, 3356406.153307665], [4443196.088304415, 3348189.667483374], [4436594.579228962, 3346892.3276163805], [4434563.345667283, 3349703.230661533], [4424661.082054103, 3345594.9877493875], [4425930.603030152, 3340838.074903745], [4423645.465273264, 3336297.3853692682], [4405618.26741337, 3335648.7154357717], [4399270.662533127, 3339324.511725586], [4400794.087704385, 3341919.191459573], [4393938.674433721, 3345594.9877493875], [4386829.356967848, 3358784.6097304868], [4382259.081454072, 3360298.172908645], [4376673.189159458, 3355541.260063003], [4367786.542327116, 3362676.6293314667], [4360677.224861243, 3362027.95939797], [4363216.266813341, 3372190.4550227514], [4371087.296864843, 3375433.8046902344], [4377434.9017450875, 3384515.183759188], [4381243.464673233, 3385380.07700385], [4384036.410820541, 3393812.7861393066], [4397239.428971449, 3384947.630381519], [4405364.36321816, 3388407.2033601683], [4406633.88419421, 3391218.10640532], [4405618.26741337, 3394245.2327616382], [4407141.692584629, 3394677.679383969], [4410696.351317566, 3391650.5530276513], [4412727.584879244, 3382785.3972698636], [4419329.093954697, 3384515.183759188], [4420598.614930746, 3391434.329716486], [4418567.381369068, 3398137.252362618], [4416790.052002599, 3397921.0290514524], [4419075.189759487, 3399218.368918446], [4419582.998149907, 3408083.5246762335], [4428215.7407870395, 3407218.631431571], [4434817.249862493, 3410894.427721386], [4439387.525376269, 3408515.971298565]]]}}, {"type": "Feature", "properties": {"id": "DE911", "na": "Braunschweig, Kreisfreie Stadt", "AGS": "03101"}, "geometry": {"type": "Polygon", "coordinates": [[[4362454.554227712, 3248510.7210360514], [4364993.596179809, 3243105.138256913], [4360423.320666033, 3232942.6426321315], [4355599.140957048, 3230996.6328316415], [4351028.8654432725, 3232726.419320966], [4350267.152857643, 3234672.429121456], [4350013.248662433, 3246780.934546727], [4354075.715785789, 3245699.8179908996], [4353314.00320016, 3249159.3909695484], [4356868.661933096, 3249375.6142807137], [4362454.554227712, 3248510.7210360514]]]}}, {"type": "Feature", "properties": {"id": "DE912", "na": "Salzgitter, Kreisfreie Stadt", "AGS": "03102"}, "geometry": {"type": "Polygon", "coordinates": [[[4355599.140957048, 3230996.6328316415], [4350521.057052853, 3224509.9334966745], [4353314.00320016, 3215212.3311165557], [4343411.739586979, 3211536.5348267416], [4340618.793439671, 3213698.767938397], [4344427.356367818, 3216725.8942947146], [4342650.02700135, 3221266.5838291915], [4338333.655682784, 3221915.253762688], [4337064.134706736, 3229050.6230311515], [4338587.559877994, 3230347.962898145], [4344681.260563028, 3229699.2929646485], [4350267.152857643, 3234672.429121456], [4351028.8654432725, 3232726.419320966], [4355599.140957048, 3230996.6328316415]]]}}, {"type": "Feature", "properties": {"id": "DE913", "na": "Wolfsburg, Kreisfreie Stadt", "AGS": "03103"}, "geometry": {"type": "Polygon", "coordinates": [[[4381497.368868443, 3261484.1197059853], [4381497.368868443, 3248726.944347217], [4378704.422721136, 3245483.5946797337], [4366770.925546277, 3252402.740637032], [4364993.596179809, 3259538.1099054953], [4375149.7639882, 3264078.7994399723], [4381497.368868443, 3261484.1197059853]]]}}, {"type": "Feature", "properties": {"id": "DE914", "na": "Gifhorn", "AGS": "03151"}, "geometry": {"type": "Polygon", "coordinates": [[[4372102.913645682, 3298890.752537627], [4374895.85979299, 3289809.3734686733], [4383528.602430122, 3278349.5379768987], [4387083.261163058, 3279863.1011550575], [4384544.21921096, 3273592.6251312564], [4389622.303115156, 3265808.5859292964], [4384544.21921096, 3262997.682884144], [4381497.368868443, 3261484.1197059853], [4375149.7639882, 3264078.7994399723], [4364993.596179809, 3259538.1099054953], [4366770.925546277, 3252402.740637032], [4362454.554227712, 3248510.7210360514], [4356868.661933096, 3249375.6142807137], [4353314.00320016, 3249159.3909695484], [4354075.715785789, 3245699.8179908996], [4350013.248662433, 3246780.934546727], [4345442.973148657, 3257159.653482674], [4340872.697634881, 3259970.556527826], [4339603.176658833, 3266889.702485124], [4338587.559877994, 3267754.5957297864], [4348743.727686385, 3272943.95519776], [4349251.536076804, 3277484.644732237], [4346966.398319916, 3280079.3244662234], [4345696.877343867, 3290458.04340217], [4351028.8654432725, 3300836.7623381168], [4358138.182909145, 3302782.7721386068], [4366263.117155857, 3295431.179558978], [4372102.913645682, 3298890.752537627]]]}}, {"type": "Feature", "properties": {"id": "DE915", "na": "G\u00c3\u00b6ttingen", "AGS": "03152"}, "geometry": {"type": "Polygon", "coordinates": [[[4346458.589929497, 3160724.056702835], [4331478.24241212, 3146453.3181659086], [4324368.924946247, 3147318.2114105704], [4315990.086504325, 3140399.0654532723], [4314974.469723486, 3144507.308365418], [4307357.343867193, 3144507.308365418], [4300248.0264013205, 3139317.9488974446], [4305326.110305515, 3134993.482674134], [4300755.8347917395, 3132398.802940147], [4290853.571178559, 3136723.269163458], [4290091.858592929, 3138020.6090304516], [4291615.283764188, 3143426.1918095904], [4296185.559277964, 3145155.9782989146], [4292123.092154607, 3156399.590479524], [4296693.367668383, 3160291.610080504], [4295169.942497125, 3163318.7364368215], [4298216.792839642, 3162021.3965698285], [4299232.409620481, 3163534.9597479873], [4303294.876743837, 3167210.7560378015], [4325892.3501175055, 3166562.0861043055], [4331986.05080254, 3170670.329016451], [4332747.763388169, 3170670.329016451], [4342650.02700135, 3166562.0861043055], [4341888.314415721, 3162021.3965698285], [4346458.589929497, 3160724.056702835]]]}}, {"type": "Feature", "properties": {"id": "DE916", "na": "Goslar", "AGS": "03153"}, "geometry": {"type": "Polygon", "coordinates": [[[4359661.608080404, 3210671.641582079], [4363470.171008551, 3206563.3986699334], [4365501.404570228, 3200076.699334967], [4360677.224861243, 3192725.1067553377], [4361185.033251663, 3185589.737486874], [4364231.8835941795, 3183211.281064053], [4369563.871693585, 3170454.1057052854], [4367786.542327116, 3170021.659082954], [4361946.745837292, 3174562.348617431], [4355853.045152257, 3172616.338816941], [4354583.524176208, 3177157.0283514177], [4355345.236761838, 3183859.95099755], [4342142.21861093, 3184292.3976198807], [4339603.176658833, 3189265.533776689], [4335032.901145057, 3190779.0969548477], [4331478.24241212, 3187103.300665033], [4328431.392069603, 3199211.8060903046], [4325384.5417270865, 3202022.709135457], [4326654.0627031345, 3205266.05880294], [4334525.092754638, 3205266.05880294], [4335032.901145057, 3210887.8648932446], [4340618.793439671, 3213698.767938397], [4343411.739586979, 3211536.5348267416], [4353314.00320016, 3215212.3311165557], [4355345.236761838, 3207860.738536927], [4359661.608080404, 3210671.641582079]]]}}, {"type": "Feature", "properties": {"id": "DE917", "na": "Helmstedt", "AGS": "03154"}, "geometry": {"type": "Polygon", "coordinates": [[[4387083.261163058, 3216725.8942947146], [4375911.476573829, 3215644.777738887], [4375403.668183409, 3219104.3507175357], [4380735.656282814, 3224077.486874344], [4381497.368868443, 3230347.962898145], [4377180.9975498775, 3231645.3027651384], [4370579.488474423, 3239429.3419670984], [4369817.775888794, 3243970.0315015754], [4364993.596179809, 3243105.138256913], [4362454.554227712, 3248510.7210360514], [4366770.925546277, 3252402.740637032], [4378704.422721136, 3245483.5946797337], [4381497.368868443, 3248726.944347217], [4381497.368868443, 3261484.1197059853], [4384544.21921096, 3262997.682884144], [4384544.21921096, 3261700.3430171506], [4391653.536676833, 3253267.6338816937], [4393176.961848092, 3249591.8375918795], [4391653.536676833, 3245051.148057403], [4395208.19540977, 3235969.768988449], [4390384.015700785, 3232726.419320966], [4391907.440872043, 3229699.2929646485], [4387083.261163058, 3216725.8942947146]]]}}, {"type": "Feature", "properties": {"id": "DE918", "na": "Northeim", "AGS": "03155"}, "geometry": {"type": "Polygon", "coordinates": [[[4325384.5417270865, 3202022.709135457], [4328431.392069603, 3199211.8060903046], [4331478.24241212, 3187103.300665033], [4331986.05080254, 3170670.329016451], [4325892.3501175055, 3166562.0861043055], [4303294.876743837, 3167210.7560378015], [4299232.409620481, 3163534.9597479873], [4295169.942497125, 3169589.212460623], [4287806.7208360415, 3168508.0959047955], [4286283.295664784, 3171318.9989499478], [4282220.828541427, 3171318.9989499478], [4280697.403370168, 3170886.552327616], [4282220.828541427, 3176292.1351067554], [4290345.762788139, 3181049.0479523977], [4291869.187959398, 3186670.8540427024], [4300755.8347917395, 3196400.9030451523], [4306341.727086354, 3195103.563178159], [4313704.948747437, 3199644.2527126353], [4320814.266213311, 3199428.02940147], [4323353.308165409, 3204184.9422471123], [4325384.5417270865, 3202022.709135457]]]}}, {"type": "Feature", "properties": {"id": "DE919", "na": "Osterode am Harz", "AGS": "03156"}, "geometry": {"type": "Polygon", "coordinates": [[[4367786.542327116, 3170021.659082954], [4359661.608080404, 3160724.056702835], [4354837.428371418, 3162886.289814491], [4346712.494124706, 3164183.629681484], [4346458.589929497, 3160724.056702835], [4341888.314415721, 3162021.3965698285], [4342650.02700135, 3166562.0861043055], [4332747.763388169, 3170670.329016451], [4331986.05080254, 3170670.329016451], [4331478.24241212, 3187103.300665033], [4335032.901145057, 3190779.0969548477], [4339603.176658833, 3189265.533776689], [4342142.21861093, 3184292.3976198807], [4355345.236761838, 3183859.95099755], [4354583.524176208, 3177157.0283514177], [4355853.045152257, 3172616.338816941], [4361946.745837292, 3174562.348617431], [4367786.542327116, 3170021.659082954]]]}}, {"type": "Feature", "properties": {"id": "DE91A", "na": "Peine", "AGS": "03157"}, "geometry": {"type": "Polygon", "coordinates": [[[4350013.248662433, 3246780.934546727], [4350267.152857643, 3234672.429121456], [4344681.260563028, 3229699.2929646485], [4338587.559877994, 3230347.962898145], [4338079.751487575, 3233807.535876794], [4333509.475973799, 3236185.992299615], [4320814.266213311, 3235537.3223661184], [4323353.308165409, 3241591.5750787538], [4329954.817240862, 3246564.7112355614], [4335032.901145057, 3257808.3234161707], [4340872.697634881, 3259970.556527826], [4345442.973148657, 3257159.653482674], [4350013.248662433, 3246780.934546727]]]}}, {"type": "Feature", "properties": {"id": "DE91B", "na": "Wolfenb\u00c3\u00bcttel", "AGS": "03158"}, "geometry": {"type": "MultiPolygon", "coordinates": [[[[4359661.608080404, 3210671.641582079], [4355345.236761838, 3207860.738536927], [4353314.00320016, 3215212.3311165557], [4350521.057052853, 3224509.9334966745], [4355599.140957048, 3230996.6328316415], [4360423.320666033, 3232942.6426321315], [4364993.596179809, 3243105.138256913], [4369817.775888794, 3243970.0315015754], [4370579.488474423, 3239429.3419670984], [4377180.9975498775, 3231645.3027651384], [4381497.368868443, 3230347.962898145], [4380735.656282814, 3224077.486874344], [4375403.668183409, 3219104.3507175357], [4375911.476573829, 3215644.777738887], [4359661.608080404, 3210671.641582079]]], [[[4340618.793439671, 3213698.767938397], [4335032.901145057, 3210887.8648932446], [4333001.667583379, 3225807.2733636685], [4337064.134706736, 3229050.6230311515], [4338333.655682784, 3221915.253762688], [4342650.02700135, 3221266.5838291915], [4344427.356367818, 3216725.8942947146], [4340618.793439671, 3213698.767938397]]]]}}, {"type": "Feature", "properties": {"id": "DE922", "na": "Diepholz", "AGS": "03251"}, "geometry": {"type": "Polygon", "coordinates": [[[4248197.666383319, 3323107.7633881695], [4249213.283164158, 3320945.5302765137], [4247435.95379769, 3317702.1806090306], [4250482.804140206, 3309485.694784739], [4255053.079653982, 3313593.937696885], [4261400.684534227, 3310134.364718236], [4261146.780339017, 3306458.5684284214], [4255814.792239612, 3303863.8886944344], [4257592.12160608, 3302350.325516276], [4257846.02580129, 3295647.4028701438], [4254545.271263563, 3284620.0140007], [4245404.720236012, 3280727.99439972], [4244389.103455173, 3278565.7612880645], [4246674.241212061, 3277052.1981099052], [4246166.432821641, 3272295.285264263], [4232963.414670734, 3266457.255862793], [4230932.181109056, 3268403.265663283], [4219760.396519826, 3268403.265663283], [4214174.504225211, 3261051.673083654], [4205287.85739287, 3262132.789639482], [4206049.569978499, 3266889.702485124], [4206557.378368918, 3270781.7220861046], [4209096.420321016, 3272727.7318865946], [4206303.474173709, 3278781.98459923], [4205541.76158808, 3283755.1207560375], [4206811.282564128, 3287863.3636681833], [4217729.162958148, 3292836.4998249914], [4216967.450372519, 3300188.0924046203], [4228900.947547377, 3305593.675183759], [4233217.318865944, 3313161.4910745537], [4232963.414670734, 3318350.850542527], [4229916.564328216, 3319648.1904095206], [4230932.181109056, 3323107.7633881695], [4234486.839841992, 3326999.7829891494], [4239057.115355767, 3326351.113055653], [4248197.666383319, 3323107.7633881695]]]}}, {"type": "Feature", "properties": {"id": "DE923", "na": "Hameln-Pyrmont", "AGS": "03252"}, "geometry": {"type": "Polygon", "coordinates": [[[4295677.750887545, 3224726.1568078403], [4297962.888644433, 3219969.243962198], [4296439.463473174, 3216077.224361218], [4296693.367668383, 3206130.9520476023], [4294154.325716286, 3209590.5250262516], [4291361.379568978, 3214996.10780539], [4288822.33761688, 3214347.437871894], [4273334.181709086, 3201590.2625131253], [4271049.043952198, 3202671.3790689535], [4271049.043952198, 3207212.06860343], [4265209.247462373, 3206347.1753587676], [4263178.013900695, 3221266.5838291915], [4265970.960048002, 3226239.719985999], [4263431.918095904, 3230996.6328316415], [4277904.457222861, 3234672.429121456], [4283236.445322266, 3240726.6818340914], [4285013.774688735, 3239861.788589429], [4288060.625031251, 3233807.535876794], [4286537.199859993, 3228618.1764088203], [4295677.750887545, 3224726.1568078403]]]}}, {"type": "Feature", "properties": {"id": "DE925", "na": "Hildesheim", "AGS": "03254"}, "geometry": {"type": "Polygon", "coordinates": [[[4323353.308165409, 3241591.5750787538], [4320814.266213311, 3235537.3223661184], [4333509.475973799, 3236185.992299615], [4338079.751487575, 3233807.535876794], [4338587.559877994, 3230347.962898145], [4337064.134706736, 3229050.6230311515], [4333001.667583379, 3225807.2733636685], [4335032.901145057, 3210887.8648932446], [4334525.092754638, 3205266.05880294], [4326654.0627031345, 3205266.05880294], [4325384.5417270865, 3202022.709135457], [4323353.308165409, 3204184.9422471123], [4320814.266213311, 3199428.02940147], [4313704.948747437, 3199644.2527126353], [4305326.110305515, 3207644.5152257616], [4296693.367668383, 3206130.9520476023], [4296439.463473174, 3216077.224361218], [4297962.888644433, 3219969.243962198], [4295677.750887545, 3224726.1568078403], [4302279.259962998, 3228834.399719986], [4300248.0264013205, 3232077.749387469], [4306341.727086354, 3229483.0696534826], [4308626.864843242, 3235537.3223661184], [4305326.110305515, 3235969.768988449], [4306849.535476774, 3237915.778788939], [4320814.266213311, 3242240.2450122507], [4323353.308165409, 3241591.5750787538]]]}}, {"type": "Feature", "properties": {"id": "DE926", "na": "Holzminden", "AGS": "03255"}, "geometry": {"type": "Polygon", "coordinates": [[[4296693.367668383, 3206130.9520476023], [4305326.110305515, 3207644.5152257616], [4313704.948747437, 3199644.2527126353], [4306341.727086354, 3195103.563178159], [4300755.8347917395, 3196400.9030451523], [4291869.187959398, 3186670.8540427024], [4290345.762788139, 3181049.0479523977], [4282220.828541427, 3176292.1351067554], [4280697.403370168, 3170886.552327616], [4277650.553027651, 3171318.9989499478], [4277904.457222861, 3181697.7178858942], [4282220.828541427, 3187535.747287364], [4283744.253712686, 3194887.339866993], [4274349.7984899245, 3194022.446622331], [4275873.223661182, 3198563.1361568077], [4273334.181709086, 3201590.2625131253], [4288822.33761688, 3214347.437871894], [4291361.379568978, 3214996.10780539], [4294154.325716286, 3209590.5250262516], [4296693.367668383, 3206130.9520476023]]]}}, {"type": "Feature", "properties": {"id": "DE927", "na": "Nienburg (Weser)", "AGS": "03256"}, "geometry": {"type": "Polygon", "coordinates": [[[4275365.415270763, 3295647.4028701438], [4286029.391469574, 3291106.713335667], [4289584.05020251, 3283538.897444872], [4288568.433421671, 3279430.654532727], [4285013.774688735, 3281376.664333217], [4276381.032051602, 3277268.421421071], [4278412.26561328, 3273592.6251312564], [4269271.714585729, 3269268.1589079453], [4271556.852342617, 3260835.4497724883], [4261400.684534227, 3256294.760238012], [4260385.067753388, 3258889.4399719983], [4261908.4929246465, 3264295.0227511376], [4256576.504825241, 3266024.8092404623], [4248705.4747737385, 3255213.643682184], [4233471.223061153, 3254348.750437522], [4232963.414670734, 3266457.255862793], [4246166.432821641, 3272295.285264263], [4246674.241212061, 3277052.1981099052], [4244389.103455173, 3278565.7612880645], [4245404.720236012, 3280727.99439972], [4254545.271263563, 3284620.0140007], [4257846.02580129, 3295647.4028701438], [4257592.12160608, 3302350.325516276], [4255814.792239612, 3303863.8886944344], [4261146.780339017, 3306458.5684284214], [4261400.684534227, 3310134.364718236], [4265209.247462373, 3310566.8113405667], [4267240.481024051, 3303863.8886944344], [4266478.768438422, 3301052.985649282], [4275365.415270763, 3295647.4028701438]]]}}, {"type": "Feature", "properties": {"id": "DE928", "na": "Schaumburg", "AGS": "03257"}, "geometry": {"type": "Polygon", "coordinates": [[[4283236.445322266, 3240726.6818340914], [4277904.457222861, 3234672.429121456], [4263431.918095904, 3230996.6328316415], [4265970.960048002, 3226239.719985999], [4263178.013900695, 3221266.5838291915], [4261654.5887294365, 3221266.5838291915], [4263431.918095904, 3223645.040252012], [4262416.3013150655, 3225374.826741337], [4252260.133506675, 3231861.526076304], [4251752.325116256, 3232077.749387469], [4255814.792239612, 3230780.409520476], [4257846.02580129, 3236402.2156107808], [4250228.899944997, 3241591.5750787538], [4261400.684534227, 3256294.760238012], [4271556.852342617, 3260835.4497724883], [4272318.564928247, 3259105.663283164], [4278158.36141807, 3258673.216660833], [4275111.5110755535, 3252835.187259363], [4280951.307565378, 3255213.643682184], [4282474.732736637, 3250672.9541477077], [4279935.690784539, 3247213.3811690584], [4280697.403370168, 3243321.3615680784], [4283236.445322266, 3240726.6818340914]]]}}, {"type": "Feature", "properties": {"id": "DE929", "na": "Region Hannover", "AGS": "03241"}, "geometry": {"type": "Polygon", "coordinates": [[[4303040.972548627, 3281160.441022051], [4318783.032651633, 3275754.858242912], [4320814.266213311, 3274241.295064753], [4318529.128456423, 3271646.6153307664], [4320052.553627681, 3269700.6055302764], [4326146.2543127155, 3269700.6055302764], [4330462.625631281, 3265376.1393069653], [4339603.176658833, 3266889.702485124], [4340872.697634881, 3259970.556527826], [4335032.901145057, 3257808.3234161707], [4329954.817240862, 3246564.7112355614], [4323353.308165409, 3241591.5750787538], [4320814.266213311, 3242240.2450122507], [4306849.535476774, 3237915.778788939], [4305326.110305515, 3235969.768988449], [4308626.864843242, 3235537.3223661184], [4306341.727086354, 3229483.0696534826], [4300248.0264013205, 3232077.749387469], [4302279.259962998, 3228834.399719986], [4295677.750887545, 3224726.1568078403], [4286537.199859993, 3228618.1764088203], [4288060.625031251, 3233807.535876794], [4285013.774688735, 3239861.788589429], [4283236.445322266, 3240726.6818340914], [4280697.403370168, 3243321.3615680784], [4279935.690784539, 3247213.3811690584], [4282474.732736637, 3250672.9541477077], [4280951.307565378, 3255213.643682184], [4275111.5110755535, 3252835.187259363], [4278158.36141807, 3258673.216660833], [4272318.564928247, 3259105.663283164], [4271556.852342617, 3260835.4497724883], [4269271.714585729, 3269268.1589079453], [4278412.26561328, 3273592.6251312564], [4276381.032051602, 3277268.421421071], [4285013.774688735, 3281376.664333217], [4288568.433421671, 3279430.654532727], [4289584.05020251, 3283538.897444872], [4292884.804740237, 3283971.3440672033], [4297201.176058803, 3277484.644732237], [4301009.738986949, 3277052.1981099052], [4303040.972548627, 3281160.441022051]]]}}, {"type": "Feature", "properties": {"id": "DE931", "na": "Celle", "AGS": "03351"}, "geometry": {"type": "Polygon", "coordinates": [[[4351028.8654432725, 3300836.7623381168], [4345696.877343867, 3290458.04340217], [4346966.398319916, 3280079.3244662234], [4349251.536076804, 3277484.644732237], [4348743.727686385, 3272943.95519776], [4338587.559877994, 3267754.5957297864], [4339603.176658833, 3266889.702485124], [4330462.625631281, 3265376.1393069653], [4326146.2543127155, 3269700.6055302764], [4320052.553627681, 3269700.6055302764], [4318529.128456423, 3271646.6153307664], [4320814.266213311, 3274241.295064753], [4318783.032651633, 3275754.858242912], [4303040.972548627, 3281160.441022051], [4302533.164158208, 3288728.2569128457], [4309642.481624081, 3293052.723136157], [4309388.577428872, 3301269.208960448], [4311927.619380969, 3310350.5880294014], [4319290.841042052, 3306458.5684284214], [4334017.284364218, 3313593.937696885], [4337064.134706736, 3314242.6076303814], [4342650.02700135, 3304296.335316766], [4351028.8654432725, 3300836.7623381168]]]}}, {"type": "Feature", "properties": {"id": "DE932", "na": "Cuxhaven", "AGS": "03352"}, "geometry": {"type": "Polygon", "coordinates": [[[4257084.313215661, 3413489.107455373], [4272318.564928247, 3407002.408120406], [4274603.7026851345, 3402677.9418970947], [4271556.852342617, 3400083.262163108], [4273334.181709086, 3393164.1162058106], [4264701.439071953, 3387542.310115506], [4247943.76218811, 3379542.04760238], [4252260.133506675, 3376731.144557228], [4251498.420921046, 3367649.7654882744], [4248451.570578529, 3364190.192509625], [4240580.540527026, 3365271.3090654532], [4238041.498574928, 3361595.512775639], [4239057.115355767, 3357703.4931746586], [4231693.893694685, 3353379.0269513475], [4221283.821691085, 3354892.5901295063], [4222299.438471924, 3357919.7164858244], [4221029.917495875, 3363109.0759537974], [4221029.917495875, 3374785.134756738], [4231693.893694685, 3379542.04760238], [4231693.893694685, 3389055.8732936643], [4227885.330766538, 3388190.9800490024], [4223061.151057553, 3389704.5432271613], [4220776.013300665, 3399650.815540777], [4224838.480424021, 3411759.320966048], [4225600.19300965, 3413705.330766538], [4227123.618180909, 3416083.7871893593], [4229154.851742587, 3419327.136856843], [4229916.564328216, 3420408.2534126705], [4234486.839841992, 3420624.476723836], [4235502.4566228315, 3419759.583479174], [4236010.2650132505, 3419110.9135456774], [4241596.157307865, 3414786.447322366], [4246674.241212061, 3414354.000700035], [4249467.187359368, 3414137.7773888693], [4256830.409020451, 3413489.107455373], [4257084.313215661, 3413489.107455373]]]}}, {"type": "Feature", "properties": {"id": "DE933", "na": "Harburg", "AGS": "03353"}, "geometry": {"type": "Polygon", "coordinates": [[[4341380.506025301, 3369595.7752887644], [4352298.3864193205, 3364406.415820791], [4336048.517925896, 3356189.9299965], [4335032.901145057, 3354027.6968848445], [4336810.230511526, 3342784.084704235], [4328431.392069603, 3340189.404970248], [4326146.2543127155, 3335648.7154357717], [4321068.170408521, 3340621.85159258], [4302787.068353417, 3345162.5411270563], [4299740.218010901, 3345811.211060553], [4295931.655082754, 3346676.104305215], [4291869.187959398, 3359000.833041652], [4297962.888644433, 3367001.0955547774], [4306595.631281564, 3370244.4452222614], [4305580.014500725, 3377596.0378018897], [4306595.631281564, 3376947.3678683937], [4311927.619380969, 3369163.328666433], [4314466.661333066, 3372190.4550227514], [4315482.278113905, 3367433.542177109], [4324368.924946247, 3372839.124956248], [4332493.85919296, 3365487.532376619], [4341380.506025301, 3369595.7752887644]]]}}, {"type": "Feature", "properties": {"id": "DE934", "na": "L\u00c3\u00bcchow-Dannenberg", "AGS": "03354"}, "geometry": {"type": "Polygon", "coordinates": [[[4399270.662533127, 3339324.511725586], [4405618.26741337, 3335648.7154357717], [4410696.351317566, 3328297.122856143], [4418313.477173858, 3330891.8025901294], [4428215.7407870395, 3326351.113055653], [4422629.848492425, 3323107.7633881695], [4421360.327516376, 3317918.403920196], [4422122.040102005, 3315756.1708085407], [4408157.309365468, 3308188.354917746], [4390891.824091204, 3312080.374518726], [4384290.315015751, 3305377.4518725937], [4377688.8059402965, 3305161.228561428], [4375149.7639882, 3306674.7917395867], [4375149.7639882, 3310134.364718236], [4380735.656282814, 3323540.2100105006], [4371595.105255263, 3335216.2688134406], [4381751.273063653, 3338243.3951697582], [4380735.656282814, 3343432.754637732], [4378704.422721136, 3343648.9779488975], [4378450.518525926, 3349487.0073503675], [4385813.74018701, 3343648.9779488975], [4393430.866043302, 3337162.2786139306], [4399270.662533127, 3339324.511725586]]]}}, {"type": "Feature", "properties": {"id": "DE935", "na": "L\u00c3\u00bcneburg, Landkreis", "AGS": "03355"}, "geometry": {"type": "Polygon", "coordinates": [[[4360677.224861243, 3362027.95939797], [4367786.542327116, 3362676.6293314667], [4376673.189159458, 3355541.260063003], [4382259.081454072, 3360298.172908645], [4386829.356967848, 3358784.6097304868], [4393938.674433721, 3345594.9877493875], [4400794.087704385, 3341919.191459573], [4399270.662533127, 3339324.511725586], [4393430.866043302, 3337162.2786139306], [4385813.74018701, 3343648.9779488975], [4378450.518525926, 3349487.0073503675], [4378704.422721136, 3343648.9779488975], [4380735.656282814, 3343432.754637732], [4381751.273063653, 3338243.3951697582], [4371595.105255263, 3335216.2688134406], [4357122.566128306, 3341919.191459573], [4355091.332566628, 3344081.424571228], [4346966.398319916, 3333918.9289464476], [4335286.805340267, 3328729.5694784736], [4323861.116555828, 3326999.7829891494], [4328939.200460022, 3333054.0357017852], [4326146.2543127155, 3335648.7154357717], [4328431.392069603, 3340189.404970248], [4336810.230511526, 3342784.084704235], [4335032.901145057, 3354027.6968848445], [4336048.517925896, 3356189.9299965], [4352298.3864193205, 3364406.415820791], [4354329.619980999, 3363109.0759537974], [4360677.224861243, 3362027.95939797]]]}}, {"type": "Feature", "properties": {"id": "DE936", "na": "Osterholz", "AGS": "03356"}, "geometry": {"type": "Polygon", "coordinates": [[[4248451.570578529, 3364190.192509625], [4254291.367068353, 3357271.0465523275], [4258861.642582129, 3338459.618480924], [4253021.846092304, 3335864.9387469376], [4222807.246862343, 3346243.657682884], [4219760.396519826, 3347540.9975498775], [4221029.917495875, 3363109.0759537974], [4222299.438471924, 3357919.7164858244], [4221283.821691085, 3354892.5901295063], [4231693.893694685, 3353379.0269513475], [4239057.115355767, 3357703.4931746586], [4238041.498574928, 3361595.512775639], [4240580.540527026, 3365271.3090654532], [4248451.570578529, 3364190.192509625]]]}}, {"type": "Feature", "properties": {"id": "DE937", "na": "Rotenburg (W\u00c3\u00bcmme)", "AGS": "03357"}, "geometry": {"type": "Polygon", "coordinates": [[[4291869.187959398, 3359000.833041652], [4295931.655082754, 3346676.104305215], [4299740.218010901, 3345811.211060553], [4304818.301915096, 3339756.9583479175], [4296439.463473174, 3335648.7154357717], [4294662.134106705, 3327432.2296114806], [4299232.409620481, 3323756.433321666], [4299486.313815691, 3319431.967098355], [4293138.708935447, 3312945.2677633883], [4289584.05020251, 3315972.394119706], [4284252.062103105, 3312296.5978298914], [4285013.774688735, 3317918.403920196], [4283236.445322266, 3321810.423521176], [4276381.032051602, 3320080.6370318513], [4266478.768438422, 3326999.7829891494], [4264193.630681534, 3333054.0357017852], [4266224.864243212, 3334783.8221911094], [4266478.768438422, 3341486.7448372417], [4258861.642582129, 3338459.618480924], [4254291.367068353, 3357271.0465523275], [4248451.570578529, 3364190.192509625], [4251498.420921046, 3367649.7654882744], [4252260.133506675, 3376731.144557228], [4247943.76218811, 3379542.04760238], [4264701.439071953, 3387542.310115506], [4265209.247462373, 3386677.4168708436], [4266986.576828841, 3380839.3874693736], [4273334.181709086, 3379758.2709135455], [4270033.427171359, 3374785.134756738], [4275111.5110755535, 3371974.2317115855], [4278412.26561328, 3364622.6391319567], [4284252.062103105, 3359865.7262863144], [4288568.433421671, 3364406.415820791], [4292630.900545027, 3362460.406020301], [4291869.187959398, 3359000.833041652]]]}}, {"type": "Feature", "properties": {"id": "DE938", "na": "Heidekreis", "AGS": "03358"}, "geometry": {"type": "Polygon", "coordinates": [[[4326146.2543127155, 3335648.7154357717], [4328939.200460022, 3333054.0357017852], [4323861.116555828, 3326999.7829891494], [4335286.805340267, 3328729.5694784736], [4335794.613730687, 3323972.6566328313], [4331732.14660733, 3322891.5400770037], [4335540.709535477, 3322242.870143507], [4337064.134706736, 3314242.6076303814], [4334017.284364218, 3313593.937696885], [4319290.841042052, 3306458.5684284214], [4311927.619380969, 3310350.5880294014], [4309388.577428872, 3301269.208960448], [4309642.481624081, 3293052.723136157], [4302533.164158208, 3288728.2569128457], [4303040.972548627, 3281160.441022051], [4301009.738986949, 3277052.1981099052], [4297201.176058803, 3277484.644732237], [4292884.804740237, 3283971.3440672033], [4289584.05020251, 3283538.897444872], [4286029.391469574, 3291106.713335667], [4275365.415270763, 3295647.4028701438], [4279935.690784539, 3302782.7721386068], [4278920.0740037, 3304728.7819390967], [4281459.115955798, 3310134.364718236], [4284252.062103105, 3312296.5978298914], [4289584.05020251, 3315972.394119706], [4293138.708935447, 3312945.2677633883], [4299486.313815691, 3319431.967098355], [4299232.409620481, 3323756.433321666], [4294662.134106705, 3327432.2296114806], [4296439.463473174, 3335648.7154357717], [4304818.301915096, 3339756.9583479175], [4299740.218010901, 3345811.211060553], [4302787.068353417, 3345162.5411270563], [4321068.170408521, 3340621.85159258], [4326146.2543127155, 3335648.7154357717]]]}}, {"type": "Feature", "properties": {"id": "DE939", "na": "Stade", "AGS": "03359"}, "geometry": {"type": "Polygon", "coordinates": [[[4287045.0082504125, 3400083.262163108], [4291361.379568978, 3389920.7665383266], [4303040.972548627, 3383434.06720336], [4305580.014500725, 3377596.0378018897], [4306595.631281564, 3370244.4452222614], [4297962.888644433, 3367001.0955547774], [4291869.187959398, 3359000.833041652], [4292630.900545027, 3362460.406020301], [4288568.433421671, 3364406.415820791], [4284252.062103105, 3359865.7262863144], [4278412.26561328, 3364622.6391319567], [4275111.5110755535, 3371974.2317115855], [4270033.427171359, 3374785.134756738], [4273334.181709086, 3379758.2709135455], [4266986.576828841, 3380839.3874693736], [4265209.247462373, 3386677.4168708436], [4264701.439071953, 3387542.310115506], [4273334.181709086, 3393164.1162058106], [4271556.852342617, 3400083.262163108], [4274603.7026851345, 3402677.9418970947], [4272318.564928247, 3407002.408120406], [4257084.313215661, 3413489.107455373], [4256576.504825241, 3414786.447322366], [4254799.175458773, 3418894.6902345116], [4256576.504825241, 3419543.360168008], [4268256.09780489, 3419543.360168008], [4274349.7984899245, 3417597.350367518], [4287045.0082504125, 3400083.262163108]]]}}, {"type": "Feature", "properties": {"id": "DE93A", "na": "Uelzen", "AGS": "03360"}, "geometry": {"type": "Polygon", "coordinates": [[[4371595.105255263, 3335216.2688134406], [4380735.656282814, 3323540.2100105006], [4375149.7639882, 3310134.364718236], [4375149.7639882, 3306674.7917395867], [4377688.8059402965, 3305161.228561428], [4372610.722036102, 3304080.1120056002], [4372102.913645682, 3298890.752537627], [4366263.117155857, 3295431.179558978], [4358138.182909145, 3302782.7721386068], [4351028.8654432725, 3300836.7623381168], [4342650.02700135, 3304296.335316766], [4337064.134706736, 3314242.6076303814], [4335540.709535477, 3322242.870143507], [4331732.14660733, 3322891.5400770037], [4335794.613730687, 3323972.6566328313], [4335286.805340267, 3328729.5694784736], [4346966.398319916, 3333918.9289464476], [4355091.332566628, 3344081.424571228], [4357122.566128306, 3341919.191459573], [4371595.105255263, 3335216.2688134406]]]}}, {"type": "Feature", "properties": {"id": "DE93B", "na": "Verden", "AGS": "03361"}, "geometry": {"type": "Polygon", "coordinates": [[[4284252.062103105, 3312296.5978298914], [4281459.115955798, 3310134.364718236], [4278920.0740037, 3304728.7819390967], [4279935.690784539, 3302782.7721386068], [4275365.415270763, 3295647.4028701438], [4266478.768438422, 3301052.985649282], [4267240.481024051, 3303863.8886944344], [4265209.247462373, 3310566.8113405667], [4261400.684534227, 3310134.364718236], [4255053.079653982, 3313593.937696885], [4250482.804140206, 3309485.694784739], [4247435.95379769, 3317702.1806090306], [4249213.283164158, 3320945.5302765137], [4248197.666383319, 3323107.7633881695], [4252514.037701885, 3326783.5596779836], [4250482.804140206, 3334783.8221911094], [4253021.846092304, 3335864.9387469376], [4258861.642582129, 3338459.618480924], [4266478.768438422, 3341486.7448372417], [4266224.864243212, 3334783.8221911094], [4264193.630681534, 3333054.0357017852], [4266478.768438422, 3326999.7829891494], [4276381.032051602, 3320080.6370318513], [4283236.445322266, 3321810.423521176], [4285013.774688735, 3317918.403920196], [4284252.062103105, 3312296.5978298914]]]}}, {"type": "Feature", "properties": {"id": "DE941", "na": "Delmenhorst, Kreisfreie Stadt", "AGS": "03401"}, "geometry": {"type": "Polygon", "coordinates": [[[4234486.839841992, 3326999.7829891494], [4230932.181109056, 3323107.7633881695], [4225600.19300965, 3322242.870143507], [4225854.09720486, 3326783.5596779836], [4229662.660133006, 3333270.2590129506], [4230932.181109056, 3334135.152257613], [4231947.797889894, 3333486.482324116], [4234486.839841992, 3326999.7829891494]]]}}, {"type": "Feature", "properties": {"id": "DE942", "na": "Emden, Kreisfreie Stadt", "AGS": "03402"}, "geometry": {"type": "Polygon", "coordinates": [[[4141811.8085904294, 3363541.522576129], [4141050.0960048, 3360298.172908645], [4138764.958247912, 3360946.842842142], [4135972.012100605, 3361595.512775639], [4121245.5687784385, 3365487.532376619], [4139780.575028751, 3369811.9985999297], [4141811.8085904294, 3363541.522576129]]]}}, {"type": "Feature", "properties": {"id": "DE943", "na": "Oldenburg (Oldenburg), Kreisfreie Stadt", "AGS": "03403"}, "geometry": {"type": "Polygon", "coordinates": [[[4207572.995149758, 3343648.9779488975], [4208080.803540177, 3339540.7350367517], [4205795.665783289, 3333486.482324116], [4202241.007050352, 3331972.9191459576], [4200209.773488674, 3333054.0357017852], [4200463.677683884, 3335432.492124606], [4195639.497974899, 3334783.8221911094], [4198178.539926996, 3342567.86139307], [4202241.007050352, 3345162.5411270563], [4207572.995149758, 3343648.9779488975]]]}}, {"type": "Feature", "properties": {"id": "DE944", "na": "Osnabr\u00c3\u00bcck, Kreisfreie Stadt", "AGS": "03404"}, "geometry": {"type": "Polygon", "coordinates": [[[4181420.863043152, 3242240.2450122507], [4179897.4378718934, 3245483.5946797337], [4183959.9049952496, 3246348.487924396], [4182182.575628781, 3248078.2744137207], [4185991.1385569274, 3248078.2744137207], [4196909.018950948, 3242888.9149457472], [4187006.755337767, 3237699.555477774], [4181420.863043152, 3242240.2450122507]]]}}, {"type": "Feature", "properties": {"id": "DE945", "na": "Wilhelmshaven, Kreisfreie Stadt", "AGS": "03405"}, "geometry": {"type": "Polygon", "coordinates": [[[4192338.743437172, 3379325.8242912143], [4188276.2763138153, 3390353.2131606583], [4194623.88119406, 3394029.0094504724], [4194877.78538927, 3394029.0094504724], [4196401.210560528, 3391218.10640532], [4198432.444122206, 3389704.5432271613], [4198686.348317415, 3387758.5334266713], [4198940.252512625, 3384731.4070703536], [4199194.156707835, 3382569.173958698], [4199194.156707835, 3381704.280714036], [4199194.156707835, 3381055.610780539], [4192338.743437172, 3379325.8242912143]]]}}, {"type": "Feature", "properties": {"id": "DE946", "na": "Ammerland", "AGS": "03451"}, "geometry": {"type": "Polygon", "coordinates": [[[4207572.995149758, 3343648.9779488975], [4202241.007050352, 3345162.5411270563], [4198178.539926996, 3342567.86139307], [4195639.497974899, 3334783.8221911094], [4190307.5098754936, 3329594.462723136], [4177358.395919796, 3341702.9681484075], [4168471.7490874543, 3343648.9779488975], [4167456.132306615, 3348405.89079454], [4177612.3001150056, 3356189.9299965], [4180151.3420671034, 3362460.406020301], [4185737.234361718, 3357054.823241162], [4199448.060903045, 3362244.182709135], [4199701.965098254, 3361379.2894644733], [4198940.252512625, 3358568.386419321], [4205033.95319766, 3354892.5901295063], [4207572.995149758, 3343648.9779488975]]]}}, {"type": "Feature", "properties": {"id": "DE947", "na": "Aurich", "AGS": "03452"}, "geometry": {"type": "Polygon", "coordinates": [[[4159077.293864693, 3399218.368918446], [4150444.551227561, 3392947.8928946448], [4149428.9344467223, 3384731.4070703536], [4165170.994549727, 3386244.9702485125], [4166694.419720986, 3375217.581379069], [4170756.886844342, 3376298.6979348967], [4175581.0665533273, 3365271.3090654532], [4160854.6232311614, 3360946.842842142], [4153491.4015700785, 3365487.532376619], [4141811.8085904294, 3363541.522576129], [4139780.575028751, 3369811.9985999297], [4121245.5687784385, 3365487.532376619], [4121499.4729736485, 3367001.0955547774], [4122261.185559278, 3371325.561778089], [4122768.9939496974, 3375217.581379069], [4123530.706535327, 3379109.600980049], [4128100.9820491024, 3382352.950647532], [4128608.790439522, 3382785.3972698636], [4129878.311415571, 3383434.06720336], [4131401.736586829, 3384515.183759188], [4128354.886244312, 3389704.5432271613], [4131147.8323916197, 3392082.9996499824], [4132163.4491724586, 3392947.8928946448], [4138764.958247912, 3399002.1456072805], [4154507.0183509174, 3400299.4854742736], [4159077.293864693, 3399218.368918446]]]}}, {"type": "Feature", "properties": {"id": "DE948", "na": "Cloppenburg", "AGS": "03453"}, "geometry": {"type": "Polygon", "coordinates": [[[4168471.7490874543, 3343648.9779488975], [4177358.395919796, 3341702.9681484075], [4190307.5098754936, 3329594.462723136], [4195131.689584479, 3322891.5400770037], [4194623.88119406, 3314891.2775638783], [4203764.432221611, 3308620.8015400767], [4202748.815440772, 3301485.4322716137], [4199448.060903045, 3296296.07280364], [4190053.605680284, 3295863.626181309], [4187006.755337767, 3287863.3636681833], [4178374.012700635, 3289809.3734686733], [4164663.186159308, 3288079.586979349], [4161362.4316215813, 3293485.169758488], [4166694.419720986, 3297809.635981799], [4164663.186159308, 3301485.4322716137], [4166948.323916196, 3307107.2383619184], [4175327.1623581178, 3314675.0542527125], [4169233.4616730837, 3317485.957297865], [4167456.132306615, 3325486.2198109906], [4160854.6232311614, 3330243.132656633], [4163901.4735736786, 3344513.87119356], [4165170.994549727, 3343648.9779488975], [4168471.7490874543, 3343648.9779488975]]]}}, {"type": "Feature", "properties": {"id": "DE949", "na": "Emsland", "AGS": "03454"}, "geometry": {"type": "Polygon", "coordinates": [[[4160854.6232311614, 3330243.132656633], [4167456.132306615, 3325486.2198109906], [4169233.4616730837, 3317485.957297865], [4175327.1623581178, 3314675.0542527125], [4166948.323916196, 3307107.2383619184], [4164663.186159308, 3301485.4322716137], [4166694.419720986, 3297809.635981799], [4161362.4316215813, 3293485.169758488], [4164663.186159308, 3288079.586979349], [4159077.293864693, 3280944.217710885], [4159839.0064503225, 3277484.644732237], [4158569.4854742736, 3265376.1393069653], [4155776.5393269663, 3260835.4497724883], [4158061.677083854, 3259538.1099054953], [4155014.826741337, 3253916.3038151907], [4138003.245662283, 3244618.7014350714], [4133940.7785389265, 3251321.6240812037], [4131655.6407820387, 3263213.90619531], [4135972.012100605, 3265592.3626181306], [4136733.7246862343, 3270997.94539727], [4130640.0240011998, 3273592.6251312564], [4125308.035901795, 3280727.99439972], [4117437.0058502927, 3281592.887644382], [4118452.6226311317, 3285268.683934197], [4121753.3771688584, 3285701.1305565275], [4123530.706535327, 3304296.335316766], [4125054.131706585, 3307107.2383619184], [4133686.874343717, 3324837.5498774936], [4133686.874343717, 3337594.7252362617], [4142319.616980849, 3336946.055302765], [4152475.784789239, 3333702.7056352817], [4156284.3477173857, 3327864.6762338113], [4160854.6232311614, 3330243.132656633]]]}}, {"type": "Feature", "properties": {"id": "DE94A", "na": "Friesland (DE)", "AGS": "03455"}, "geometry": {"type": "Polygon", "coordinates": [[[4194877.78538927, 3394029.0094504724], [4194623.88119406, 3394029.0094504724], [4188276.2763138153, 3390353.2131606583], [4192338.743437172, 3379325.8242912143], [4193354.360218011, 3374136.4648232413], [4195385.593779689, 3372406.6783339167], [4200971.486074303, 3368298.4354217714], [4199448.060903045, 3362244.182709135], [4185737.234361718, 3357054.823241162], [4180151.3420671034, 3362460.406020301], [4179389.629481474, 3365271.3090654532], [4178627.916895845, 3367865.9887994397], [4186498.9469473474, 3374568.911445572], [4184213.8091904595, 3379974.4942247113], [4176342.779138957, 3379542.04760238], [4179389.629481474, 3391434.329716486], [4176342.779138957, 3402245.4952747636], [4190053.605680284, 3402029.271963598], [4190307.5098754936, 3399434.5922296112], [4190815.318265913, 3396839.9124956247], [4193354.360218011, 3394893.9026951347], [4194877.78538927, 3394029.0094504724]]]}}, {"type": "Feature", "properties": {"id": "DE94B", "na": "Grafschaft Bentheim", "AGS": "03456"}, "geometry": {"type": "Polygon", "coordinates": [[[4118452.6226311317, 3285268.683934197], [4117437.0058502927, 3281592.887644382], [4125308.035901795, 3280727.99439972], [4130640.0240011998, 3273592.6251312564], [4136733.7246862343, 3270997.94539727], [4135972.012100605, 3265592.3626181306], [4131655.6407820387, 3263213.90619531], [4133940.7785389265, 3251321.6240812037], [4138003.245662283, 3244618.7014350714], [4123022.8981449073, 3240942.9051452572], [4120737.7603880195, 3240942.9051452572], [4118198.7184359217, 3246132.2646132307], [4121753.3771688584, 3255429.8669933495], [4116421.3890694533, 3266457.255862793], [4113374.538726936, 3262997.682884144], [4096870.766038302, 3269268.1589079453], [4099155.9037951897, 3277700.868043402], [4098394.1912095603, 3284836.237311865], [4111089.4009700483, 3286998.470423521], [4118452.6226311317, 3285268.683934197]]]}}, {"type": "Feature", "properties": {"id": "DE94C", "na": "Leer", "AGS": "03457"}, "geometry": {"type": "Polygon", "coordinates": [[[4180151.3420671034, 3362460.406020301], [4177612.3001150056, 3356189.9299965], [4167456.132306615, 3348405.89079454], [4168471.7490874543, 3343648.9779488975], [4165170.994549727, 3343648.9779488975], [4163901.4735736786, 3344513.87119356], [4160854.6232311614, 3330243.132656633], [4156284.3477173857, 3327864.6762338113], [4152475.784789239, 3333702.7056352817], [4142319.616980849, 3336946.055302765], [4133686.874343717, 3337594.7252362617], [4132163.4491724586, 3340405.628281414], [4135210.2995149754, 3346892.3276163805], [4134702.4911245564, 3351865.4637731886], [4133940.7785389265, 3360298.172908645], [4137749.341467073, 3360730.6195309767], [4138764.958247912, 3360946.842842142], [4141050.0960048, 3360298.172908645], [4141811.8085904294, 3363541.522576129], [4153491.4015700785, 3365487.532376619], [4160854.6232311614, 3360946.842842142], [4175581.0665533273, 3365271.3090654532], [4179389.629481474, 3365271.3090654532], [4180151.3420671034, 3362460.406020301]]]}}, {"type": "Feature", "properties": {"id": "DE94D", "na": "Oldenburg, Landkreis", "AGS": "03458"}, "geometry": {"type": "Polygon", "coordinates": [[[4229662.660133006, 3333270.2590129506], [4225854.09720486, 3326783.5596779836], [4225600.19300965, 3322242.870143507], [4230932.181109056, 3323107.7633881695], [4229916.564328216, 3319648.1904095206], [4232963.414670734, 3318350.850542527], [4233217.318865944, 3313161.4910745537], [4228900.947547377, 3305593.675183759], [4216967.450372519, 3300188.0924046203], [4217983.067153358, 3302566.5488274414], [4209604.228711436, 3307107.2383619184], [4203764.432221611, 3308620.8015400767], [4194623.88119406, 3314891.2775638783], [4195131.689584479, 3322891.5400770037], [4190307.5098754936, 3329594.462723136], [4195639.497974899, 3334783.8221911094], [4200463.677683884, 3335432.492124606], [4200209.773488674, 3333054.0357017852], [4202241.007050352, 3331972.9191459576], [4205795.665783289, 3333486.482324116], [4208080.803540177, 3339540.7350367517], [4213158.887444372, 3341486.7448372417], [4213920.600030001, 3335864.9387469376], [4217983.067153358, 3338027.171858593], [4229662.660133006, 3333270.2590129506]]]}}, {"type": "Feature", "properties": {"id": "DE94E", "na": "Osnabr\u00c3\u00bcck, Landkreis", "AGS": "03459"}, "geometry": {"type": "Polygon", "coordinates": [[[4187006.755337767, 3287863.3636681833], [4191069.222461123, 3280295.5477773887], [4188276.2763138153, 3273160.1785089253], [4189291.8930946547, 3261051.673083654], [4195893.402170109, 3259754.3332166607], [4198940.252512625, 3265159.9159958], [4206049.569978499, 3266889.702485124], [4205287.85739287, 3262132.789639482], [4206303.474173709, 3256510.9835491776], [4214936.21681084, 3251321.6240812037], [4216205.737786889, 3240942.9051452572], [4214428.408420421, 3234888.6524326215], [4219506.492324616, 3231645.3027651384], [4212143.270663533, 3224077.486874344], [4203510.528026401, 3225374.826741337], [4190561.414070703, 3218023.234161708], [4185991.1385569274, 3219320.5740287015], [4182436.479823991, 3215861.0010500522], [4176088.874943747, 3221266.5838291915], [4184467.7133856695, 3224726.1568078403], [4185229.4259712985, 3230996.6328316415], [4177612.3001150056, 3234239.982499125], [4179389.629481474, 3241159.128456423], [4181420.863043152, 3242240.2450122507], [4187006.755337767, 3237699.555477774], [4196909.018950948, 3242888.9149457472], [4185991.1385569274, 3248078.2744137207], [4182182.575628781, 3248078.2744137207], [4177358.395919796, 3254348.750437522], [4165424.898744937, 3257159.653482674], [4163647.569378469, 3263213.90619531], [4158569.4854742736, 3265376.1393069653], [4159839.0064503225, 3277484.644732237], [4159077.293864693, 3280944.217710885], [4164663.186159308, 3288079.586979349], [4178374.012700635, 3289809.3734686733], [4187006.755337767, 3287863.3636681833]]]}}, {"type": "Feature", "properties": {"id": "DE94F", "na": "Vechta", "AGS": "03460"}, "geometry": {"type": "Polygon", "coordinates": [[[4216967.450372519, 3300188.0924046203], [4217729.162958148, 3292836.4998249914], [4206811.282564128, 3287863.3636681833], [4205541.76158808, 3283755.1207560375], [4206303.474173709, 3278781.98459923], [4209096.420321016, 3272727.7318865946], [4206557.378368918, 3270781.7220861046], [4206049.569978499, 3266889.702485124], [4198940.252512625, 3265159.9159958], [4195893.402170109, 3259754.3332166607], [4189291.8930946547, 3261051.673083654], [4188276.2763138153, 3273160.1785089253], [4191069.222461123, 3280295.5477773887], [4187006.755337767, 3287863.3636681833], [4190053.605680284, 3295863.626181309], [4199448.060903045, 3296296.07280364], [4202748.815440772, 3301485.4322716137], [4203764.432221611, 3308620.8015400767], [4209604.228711436, 3307107.2383619184], [4217983.067153358, 3302566.5488274414], [4216967.450372519, 3300188.0924046203]]]}}, {"type": "Feature", "properties": {"id": "DE94G", "na": "Wesermarsch", "AGS": "03461"}, "geometry": {"type": "Polygon", "coordinates": [[[4225092.38461923, 3380623.164158208], [4221029.917495875, 3374785.134756738], [4221029.917495875, 3363109.0759537974], [4219760.396519826, 3347540.9975498775], [4228647.043352168, 3340621.85159258], [4230932.181109056, 3334135.152257613], [4229662.660133006, 3333270.2590129506], [4217983.067153358, 3338027.171858593], [4213920.600030001, 3335864.9387469376], [4213158.887444372, 3341486.7448372417], [4208080.803540177, 3339540.7350367517], [4207572.995149758, 3343648.9779488975], [4205033.95319766, 3354892.5901295063], [4198940.252512625, 3358568.386419321], [4199701.965098254, 3361379.2894644733], [4199448.060903045, 3362244.182709135], [4200971.486074303, 3368298.4354217714], [4205287.85739287, 3367433.542177109], [4205287.85739287, 3367217.3188659432], [4207826.899344968, 3371758.0084004197], [4209096.420321016, 3373920.2415120755], [4208588.611930597, 3381055.610780539], [4208334.707735387, 3381055.610780539], [4203764.432221611, 3380623.164158208], [4203510.528026401, 3380623.164158208], [4204018.336416821, 3384298.960448022], [4204780.04900245, 3387974.7567378366], [4210365.941297065, 3390785.659782989], [4213158.887444372, 3387758.5334266713], [4214682.312615631, 3386028.7469373466], [4225092.38461923, 3380623.164158208]]]}}, {"type": "Feature", "properties": {"id": "DE94H", "na": "Wittmund", "AGS": "03462"}, "geometry": {"type": "Polygon", "coordinates": [[[4179389.629481474, 3365271.3090654532], [4175581.0665533273, 3365271.3090654532], [4170756.886844342, 3376298.6979348967], [4166694.419720986, 3375217.581379069], [4165170.994549727, 3386244.9702485125], [4149428.9344467223, 3384731.4070703536], [4150444.551227561, 3392947.8928946448], [4159077.293864693, 3399218.368918446], [4160092.9106455324, 3399218.368918446], [4176342.779138957, 3402245.4952747636], [4179389.629481474, 3391434.329716486], [4176342.779138957, 3379542.04760238], [4184213.8091904595, 3379974.4942247113], [4186498.9469473474, 3374568.911445572], [4178627.916895845, 3367865.9887994397], [4179389.629481474, 3365271.3090654532]]]}}, {"type": "Feature", "properties": {"id": "DEA11", "na": "D\u00c3\u00bcsseldorf, Kreisfreie Stadt", "AGS": "05111"}, "geometry": {"type": "Polygon", "coordinates": [[[4100933.233161658, 3117479.394469723], [4100933.233161658, 3121371.4140707036], [4097124.6702335114, 3119857.8508925447], [4096870.766038302, 3123749.8704935247], [4090015.3527676384, 3128939.2299614977], [4092554.3947197357, 3132398.802940147], [4091030.9695484773, 3134128.5894294716], [4093316.107305365, 3138236.832341617], [4092046.5863293163, 3141047.7353867693], [4096870.766038302, 3141696.4053202663], [4098394.1912095603, 3142345.0752537623], [4097886.382819141, 3134777.259362968], [4107534.7422371116, 3133479.9194959747], [4106773.0296514826, 3129804.12320616], [4102710.5625281264, 3130452.793139657], [4106011.317065853, 3124830.9870493524], [4103472.275113756, 3117911.8410920547], [4100933.233161658, 3117479.394469723]]]}}, {"type": "Feature", "properties": {"id": "DEA12", "na": "Duisburg, Kreisfreie Stadt", "AGS": "05112"}, "geometry": {"type": "Polygon", "coordinates": [[[4097886.382819141, 3162886.289814491], [4100171.5205760286, 3159859.163458173], [4099409.807990399, 3154237.3573678685], [4100171.5205760286, 3142777.521876094], [4098394.1912095603, 3142345.0752537623], [4096870.766038302, 3141696.4053202663], [4092046.5863293163, 3141047.7353867693], [4091538.777938897, 3141480.1820091004], [4086968.502425121, 3147750.6580329016], [4089253.640182009, 3149696.6678333916], [4090269.256962848, 3154237.3573678685], [4086968.502425121, 3160075.3867693385], [4091792.6821341068, 3161588.9499474973], [4090777.065353268, 3164832.299614981], [4092808.2989149457, 3165264.7462373115], [4097886.382819141, 3162886.289814491]]]}}, {"type": "Feature", "properties": {"id": "DEA13", "na": "Essen, Kreisfreie Stadt", "AGS": "05113"}, "geometry": {"type": "Polygon", "coordinates": [[[4113628.442922146, 3162237.619880994], [4119976.04780239, 3156183.3671683585], [4121753.3771688584, 3150129.1144557227], [4120483.8561928095, 3144939.7549877493], [4109565.97579879, 3141912.6286314316], [4105503.5086754337, 3144291.0850542528], [4109565.97579879, 3151858.900945047], [4106773.0296514826, 3154669.803990199], [4105757.4128706437, 3155750.9205460274], [4107788.6464323215, 3158561.823591179], [4112866.7303365166, 3162453.8431921597], [4113628.442922146, 3162237.619880994]]]}}, {"type": "Feature", "properties": {"id": "DEA14", "na": "Krefeld, Kreisfreie Stadt", "AGS": "05114"}, "geometry": {"type": "Polygon", "coordinates": [[[4086968.502425121, 3147750.6580329016], [4091538.777938897, 3141480.1820091004], [4082906.035301765, 3136074.5992299616], [4076304.526226311, 3138453.0556527823], [4076304.526226311, 3148831.7745887293], [4080113.0891544577, 3149696.6678333916], [4080113.0891544577, 3149264.2212110604], [4086968.502425121, 3147750.6580329016]]]}}, {"type": "Feature", "properties": {"id": "DEA15", "na": "M\u00c3\u00b6nchengladbach, Kreisfreie Stadt", "AGS": "05116"}, "geometry": {"type": "Polygon", "coordinates": [[[4078081.85559278, 3129587.8998949947], [4075796.717835892, 3130020.346517326], [4071988.1549077453, 3114884.714735737], [4066148.358417921, 3115749.607980399], [4061831.987099355, 3124830.9870493524], [4075035.005250262, 3130885.2397619877], [4078081.85559278, 3129587.8998949947]]]}}, {"type": "Feature", "properties": {"id": "DEA16", "na": "M\u00c3\u00bclheim an der Ruhr,Kreisfreie Stadt", "AGS": "05117"}, "geometry": {"type": "Polygon", "coordinates": [[[4105503.5086754337, 3144291.0850542528], [4100171.5205760286, 3142777.521876094], [4099409.807990399, 3154237.3573678685], [4105757.4128706437, 3155750.9205460274], [4106773.0296514826, 3154669.803990199], [4109565.97579879, 3151858.900945047], [4105503.5086754337, 3144291.0850542528]]]}}, {"type": "Feature", "properties": {"id": "DEA17", "na": "Oberhausen, Kreisfreie Stadt", "AGS": "05119"}, "geometry": {"type": "Polygon", "coordinates": [[[4107788.6464323215, 3158561.823591179], [4105757.4128706437, 3155750.9205460274], [4099409.807990399, 3154237.3573678685], [4100171.5205760286, 3159859.163458173], [4097886.382819141, 3162886.289814491], [4101441.0415520775, 3168075.649282464], [4103218.370918546, 3166562.0861043055], [4107788.6464323215, 3158561.823591179]]]}}, {"type": "Feature", "properties": {"id": "DEA18", "na": "Remscheid, Kreisfreie Stadt", "AGS": "05120"}, "geometry": {"type": "Polygon", "coordinates": [[[4132163.4491724586, 3125047.2103605177], [4131909.5449772486, 3118992.9576478824], [4129878.311415571, 3118560.5110255512], [4128862.694634732, 3119857.8508925447], [4122768.9939496974, 3119641.627581379], [4120737.7603880195, 3121155.1907595377], [4123022.8981449073, 3126128.326916346], [4129624.407220361, 3126344.5502275117], [4132163.4491724586, 3125047.2103605177]]]}}, {"type": "Feature", "properties": {"id": "DEA19", "na": "Solingen, Kreisfreie Stadt", "AGS": "05122"}, "geometry": {"type": "Polygon", "coordinates": [[[4120737.7603880195, 3121155.1907595377], [4122768.9939496974, 3119641.627581379], [4123276.802340117, 3116830.724536227], [4121499.4729736485, 3115749.607980399], [4110835.4967748383, 3116182.05460273], [4114644.059702985, 3125912.10360518], [4118706.526826341, 3126560.773538677], [4120737.7603880195, 3121155.1907595377]]]}}, {"type": "Feature", "properties": {"id": "DEA1A", "na": "Wuppertal, Kreisfreie Stadt", "AGS": "05124"}, "geometry": {"type": "Polygon", "coordinates": [[[4132925.1617580876, 3128723.0066503324], [4132163.4491724586, 3125047.2103605177], [4129624.407220361, 3126344.5502275117], [4123022.8981449073, 3126128.326916346], [4120737.7603880195, 3121155.1907595377], [4118706.526826341, 3126560.773538677], [4114644.059702985, 3125912.10360518], [4112612.826141307, 3130236.5698284917], [4123530.706535327, 3137371.9390969547], [4130132.2156107808, 3136939.492474624], [4130386.1198059903, 3130885.2397619877], [4132925.1617580876, 3128723.0066503324]]]}}, {"type": "Feature", "properties": {"id": "DEA1B", "na": "Kleve", "AGS": "05154"}, "geometry": {"type": "Polygon", "coordinates": [[[4073511.580079004, 3197049.572978649], [4079097.4723736187, 3194887.339866993], [4079859.1849592477, 3191860.2135106754], [4078589.663983199, 3184724.8442422124], [4076304.526226311, 3182778.8344417224], [4073003.7716885842, 3184508.6209310465], [4073257.675883794, 3187319.523976199], [4066656.16680834, 3175859.6884844243], [4070210.825541277, 3169156.765838292], [4078335.7597879893, 3167643.202660133], [4076812.334616731, 3162670.066503325], [4074527.196859843, 3163534.9597479873], [4078843.568178409, 3151858.900945047], [4070718.6339316964, 3150994.007700385], [4063609.316465823, 3145155.9782989146], [4058277.3283664184, 3146237.0948547428], [4057007.8073903695, 3150129.1144557227], [4058277.3283664184, 3162021.3965698285], [4050406.298314916, 3173481.232061603], [4052437.531876594, 3178886.814840742], [4046597.7353867693, 3181481.4945747284], [4046597.7353867693, 3185157.290864543], [4047867.256362818, 3186022.1841092054], [4041773.5556777837, 3189697.98039902], [4044312.5976298815, 3191860.2135106754], [4044566.5018250914, 3198779.359467973], [4049898.489924496, 3202238.9324466223], [4057007.8073903695, 3199211.8060903046], [4052945.3402670133, 3205266.05880294], [4057261.7115855794, 3205914.728736437], [4073511.580079004, 3197049.572978649]]]}}, {"type": "Feature", "properties": {"id": "DEA1C", "na": "Mettmann", "AGS": "05158"}, "geometry": {"type": "Polygon", "coordinates": [[[4123530.706535327, 3137371.9390969547], [4112612.826141307, 3130236.5698284917], [4114644.059702985, 3125912.10360518], [4110835.4967748383, 3116182.05460273], [4110327.6883844193, 3113371.151557578], [4103726.1793089653, 3110560.2485124255], [4100679.328966448, 3112290.03500175], [4100679.328966448, 3112938.7049352466], [4102710.5625281264, 3115100.9380469024], [4100933.233161658, 3117479.394469723], [4103472.275113756, 3117911.8410920547], [4106011.317065853, 3124830.9870493524], [4102710.5625281264, 3130452.793139657], [4106773.0296514826, 3129804.12320616], [4107534.7422371116, 3133479.9194959747], [4097886.382819141, 3134777.259362968], [4098394.1912095603, 3142345.0752537623], [4100171.5205760286, 3142777.521876094], [4105503.5086754337, 3144291.0850542528], [4109565.97579879, 3141912.6286314316], [4120483.8561928095, 3144939.7549877493], [4122768.9939496974, 3144291.0850542528], [4123530.706535327, 3137371.9390969547]]]}}, {"type": "Feature", "properties": {"id": "DEA1D", "na": "Rhein-Kreis Neuss", "AGS": "05162"}, "geometry": {"type": "Polygon", "coordinates": [[[4092046.5863293163, 3141047.7353867693], [4093316.107305365, 3138236.832341617], [4091030.9695484773, 3134128.5894294716], [4092554.3947197357, 3132398.802940147], [4090015.3527676384, 3128939.2299614977], [4096870.766038302, 3123749.8704935247], [4097124.6702335114, 3119857.8508925447], [4100933.233161658, 3121371.4140707036], [4100933.233161658, 3117479.394469723], [4102710.5625281264, 3115100.9380469024], [4100679.328966448, 3112938.7049352466], [4097632.4786239313, 3108830.462023101], [4094839.5324766235, 3110992.6951347566], [4090523.161158058, 3105587.112355618], [4081128.7059352966, 3106452.00560028], [4078081.85559278, 3110992.6951347566], [4074273.292664633, 3108398.01540077], [4072749.8674933743, 3109479.131956598], [4071988.1549077453, 3114884.714735737], [4075796.717835892, 3130020.346517326], [4078081.85559278, 3129587.8998949947], [4085445.0772538623, 3132182.5796289816], [4082906.035301765, 3136074.5992299616], [4091538.777938897, 3141480.1820091004], [4092046.5863293163, 3141047.7353867693]]]}}, {"type": "Feature", "properties": {"id": "DEA1E", "na": "Viersen", "AGS": "05166"}, "geometry": {"type": "Polygon", "coordinates": [[[4080113.0891544577, 3149696.6678333916], [4076304.526226311, 3148831.7745887293], [4076304.526226311, 3138453.0556527823], [4082906.035301765, 3136074.5992299616], [4085445.0772538623, 3132182.5796289816], [4078081.85559278, 3129587.8998949947], [4075035.005250262, 3130885.2397619877], [4061831.987099355, 3124830.9870493524], [4053707.0528526427, 3126344.5502275117], [4047105.5437771888, 3125263.4336716835], [4046851.6395819793, 3133047.472873644], [4058277.3283664184, 3146237.0948547428], [4063609.316465823, 3145155.9782989146], [4070718.6339316964, 3150994.007700385], [4078843.568178409, 3151858.900945047], [4079351.3765688282, 3151642.6776338816], [4080113.0891544577, 3149696.6678333916]]]}}, {"type": "Feature", "properties": {"id": "DE271", "na": "Augsburg, Kreisfreie Stadt", "AGS": "09761"}, "geometry": {"type": "Polygon", "coordinates": [[[4388606.686334317, 2794225.5442772135], [4387844.973748688, 2798333.7871893593], [4377688.8059402965, 2798982.457122856], [4380735.656282814, 2804388.039901995], [4384544.21921096, 2803955.593279664], [4386829.356967848, 2811523.4091704586], [4386321.548577429, 2816496.545327266], [4387083.261163058, 2816496.545327266], [4392161.345067253, 2806982.719635982], [4390891.824091204, 2795306.6608330416], [4388606.686334317, 2794225.5442772135]]]}}, {"type": "Feature", "properties": {"id": "DE272", "na": "Kaufbeuren, Kreisfreie Stadt", "AGS": "09762"}, "geometry": {"type": "Polygon", "coordinates": [[[4369056.063303165, 2756170.2415120755], [4370325.584279214, 2747737.532376619], [4362200.650032502, 2752278.2219110955], [4366009.212960647, 2754656.6783339167], [4369056.063303165, 2756170.2415120755]]]}}, {"type": "Feature", "properties": {"id": "DE273", "na": "Kempten (Allg\u00c3\u00a4u), Kreisfreie Stadt", "AGS": "09763"}, "geometry": {"type": "Polygon", "coordinates": [[[4348997.631881594, 2733466.793839692], [4342396.12280614, 2731520.784039202], [4339603.176658833, 2733466.793839692], [4338841.4640732035, 2739737.269863493], [4343157.835391769, 2739304.823241162], [4348743.727686385, 2738872.376618831], [4348997.631881594, 2733466.793839692]]]}}, {"type": "Feature", "properties": {"id": "DE274", "na": "Memmingen, Kreisfreie Stadt", "AGS": "09764"}, "geometry": {"type": "Polygon", "coordinates": [[[4329193.104655232, 2758116.2513125655], [4328685.296264813, 2762224.4942247113], [4329700.913045652, 2762440.7175358767], [4330970.434021701, 2766981.4070703536], [4331224.338216911, 2767846.300315016], [4338079.751487575, 2769792.310115506], [4334525.092754638, 2757467.581379069], [4329193.104655232, 2758116.2513125655]]]}}, {"type": "Feature", "properties": {"id": "DE275", "na": "Aichach-Friedberg", "AGS": "09771"}, "geometry": {"type": "Polygon", "coordinates": [[[4416790.052002599, 2818658.778438922], [4418059.572978649, 2816280.322016101], [4408157.309365468, 2812172.079103955], [4409680.734536727, 2808928.729436472], [4408157.309365468, 2803306.9233461674], [4404094.842242112, 2800712.2436121805], [4403840.938046902, 2795522.8841442075], [4399778.470923546, 2796171.5540777035], [4398001.141557078, 2791198.417920896], [4399778.470923546, 2787522.621631081], [4398001.141557078, 2787090.1750087505], [4392415.249262463, 2787738.844942247], [4389876.2073103655, 2791630.864543227], [4388098.877943898, 2791847.087854393], [4388606.686334317, 2794225.5442772135], [4390891.824091204, 2795306.6608330416], [4392161.345067253, 2806982.719635982], [4387083.261163058, 2816496.545327266], [4386321.548577429, 2816496.545327266], [4385305.93179659, 2824496.807840392], [4393938.674433721, 2826659.0409520473], [4389114.494724736, 2830767.283864193], [4396477.716385819, 2834659.303465173], [4398255.045752288, 2832713.293664683], [4406126.07580379, 2832064.6237311866], [4406379.979999, 2828388.827441372], [4404094.842242112, 2827523.9341967097], [4409934.638731936, 2824929.254462723], [4413997.105855293, 2818010.108505425], [4416790.052002599, 2818658.778438922]]]}}, {"type": "Feature", "properties": {"id": "DE276", "na": "Augsburg, Landkreis", "AGS": "09772"}, "geometry": {"type": "Polygon", "coordinates": [[[4389114.494724736, 2830767.283864193], [4393938.674433721, 2826659.0409520473], [4385305.93179659, 2824496.807840392], [4386321.548577429, 2816496.545327266], [4386829.356967848, 2811523.4091704586], [4384544.21921096, 2803955.593279664], [4380735.656282814, 2804388.039901995], [4377688.8059402965, 2798982.457122856], [4387844.973748688, 2798333.7871893593], [4388606.686334317, 2794225.5442772135], [4388098.877943898, 2791847.087854393], [4384290.315015751, 2781900.815540777], [4379466.135306765, 2782117.038851943], [4380735.656282814, 2777143.9026951347], [4377434.9017450875, 2776711.4560728036], [4373372.434621731, 2776279.0094504724], [4371849.009450473, 2784495.4952747636], [4363216.266813341, 2783846.825341267], [4364993.596179809, 2786441.5050752535], [4363724.07520376, 2788819.961498075], [4362454.554227712, 2791414.6412320617], [4364231.8835941795, 2800496.020301015], [4358138.182909145, 2802009.583479174], [4361692.841642082, 2809361.1760588028], [4360169.416470824, 2817793.8851942597], [4377688.8059402965, 2820821.0115505774], [4378450.518525926, 2834226.856842842], [4386067.644382219, 2836389.0899544978], [4386575.452772639, 2832064.6237311866], [4389114.494724736, 2830767.283864193]]]}}, {"type": "Feature", "properties": {"id": "DE277", "na": "Dillingen a.d. Donau", "AGS": "09773"}, "geometry": {"type": "Polygon", "coordinates": [[[4378450.518525926, 2834226.856842842], [4377688.8059402965, 2820821.0115505774], [4360169.416470824, 2817793.8851942597], [4352806.19480974, 2818658.778438922], [4352298.3864193205, 2822550.798039902], [4344935.164758238, 2818442.5551277567], [4341634.410220511, 2822550.798039902], [4344173.452172609, 2823415.6912845643], [4344173.452172609, 2827091.487574379], [4342903.931196559, 2834659.303465173], [4340110.985049252, 2837902.6531326566], [4340872.697634881, 2843308.235911796], [4347728.110905545, 2837902.6531326566], [4356868.661933096, 2842659.565978299], [4361692.841642082, 2848713.818690934], [4369563.871693585, 2846767.808890444], [4366770.925546277, 2841578.449422471], [4378450.518525926, 2834226.856842842]]]}}, {"type": "Feature", "properties": {"id": "DE278", "na": "G\u00c3\u00bcnzburg", "AGS": "09774"}, "geometry": {"type": "Polygon", "coordinates": [[[4360169.416470824, 2817793.8851942597], [4361692.841642082, 2809361.1760588028], [4358138.182909145, 2802009.583479174], [4364231.8835941795, 2800496.020301015], [4362454.554227712, 2791414.6412320617], [4363724.07520376, 2788819.961498075], [4359661.608080404, 2790333.5246762335], [4347220.302515126, 2784495.4952747636], [4342903.931196559, 2785792.835141757], [4342903.931196559, 2789901.078053903], [4341126.601830091, 2790765.971298565], [4341634.410220511, 2805036.709835492], [4334525.092754638, 2806766.4963248163], [4330970.434021701, 2815631.6520826044], [4338841.4640732035, 2819956.118305915], [4338079.751487575, 2821902.128106405], [4341634.410220511, 2822550.798039902], [4344935.164758238, 2818442.5551277567], [4352298.3864193205, 2822550.798039902], [4352806.19480974, 2818658.778438922], [4360169.416470824, 2817793.8851942597]]]}}, {"type": "Feature", "properties": {"id": "DE279", "na": "Neu-Ulm", "AGS": "09775"}, "geometry": {"type": "Polygon", "coordinates": [[[4330970.434021701, 2815631.6520826044], [4334525.092754638, 2806766.4963248163], [4341634.410220511, 2805036.709835492], [4341126.601830091, 2790765.971298565], [4335286.805340267, 2778873.689184459], [4331224.338216911, 2777143.9026951347], [4328177.487874393, 2783414.378718936], [4325892.3501175055, 2796387.7773888693], [4320814.266213311, 2804171.8165908298], [4320052.553627681, 2806334.049702485], [4324115.020751038, 2812820.749037452], [4323353.308165409, 2816064.098704935], [4329700.913045652, 2818010.108505425], [4330970.434021701, 2815631.6520826044]]]}}, {"type": "Feature", "properties": {"id": "DE27A", "na": "Lindau (Bodensee)", "AGS": "09776"}, "geometry": {"type": "Polygon", "coordinates": [[[4326907.966898344, 2725034.084704235], [4325638.4459222965, 2718547.3853692682], [4318529.128456423, 2714655.3657682883], [4311419.81099055, 2712709.3559677983], [4307103.439671984, 2714871.5890794536], [4307611.248062403, 2719196.055302765], [4303294.876743837, 2719412.2786139306], [4301263.6431821585, 2713574.2492124606], [4296947.271863593, 2712276.9093454676], [4287806.7208360415, 2714439.142457123], [4297962.888644433, 2722006.9583479175], [4308880.769038452, 2729358.5509275463], [4318529.128456423, 2726763.87119356], [4323099.403970199, 2729358.5509275463], [4325384.5417270865, 2729574.774238712], [4326907.966898344, 2725034.084704235]]]}}, {"type": "Feature", "properties": {"id": "DE27B", "na": "Ostallg\u00c3\u00a4u", "AGS": "09777"}, "geometry": {"type": "Polygon", "coordinates": [[[4378450.518525926, 2748169.9789989498], [4374641.95559778, 2732601.90059503], [4392669.153457673, 2723088.074903745], [4386829.356967848, 2718114.9387469376], [4387844.973748688, 2714006.6958347918], [4379720.039501975, 2711412.0161008053], [4367532.638131906, 2717250.045502275], [4364231.8835941795, 2713574.2492124606], [4355345.236761838, 2715952.7056352817], [4359407.703885194, 2728277.434371718], [4355345.236761838, 2734980.357017851], [4353567.907395369, 2742980.6195309767], [4348235.919295965, 2744277.95939797], [4345442.973148657, 2749467.3188659432], [4359407.703885194, 2758981.144557228], [4360423.320666033, 2763521.8340917043], [4367532.638131906, 2759629.8144907244], [4373118.530426521, 2768927.4168708436], [4373372.434621731, 2776279.0094504724], [4377434.9017450875, 2776711.4560728036], [4380735.656282814, 2777143.9026951347], [4381751.273063653, 2776927.679383969], [4377434.9017450875, 2770008.5334266713], [4381751.273063653, 2768927.4168708436], [4382766.889844492, 2765035.3972698636], [4378958.326916345, 2757900.0280013997], [4378450.518525926, 2748169.9789989498]], [[4369056.063303165, 2756170.2415120755], [4366009.212960647, 2754656.6783339167], [4362200.650032502, 2752278.2219110955], [4370325.584279214, 2747737.532376619], [4369056.063303165, 2756170.2415120755]]]}}, {"type": "Feature", "properties": {"id": "DE27C", "na": "Unterallg\u00c3\u00a4u", "AGS": "09778"}, "geometry": {"type": "Polygon", "coordinates": [[[4363724.07520376, 2788819.961498075], [4364993.596179809, 2786441.5050752535], [4363216.266813341, 2783846.825341267], [4371849.009450473, 2784495.4952747636], [4373372.434621731, 2776279.0094504724], [4373118.530426521, 2768927.4168708436], [4367532.638131906, 2759629.8144907244], [4360423.320666033, 2763521.8340917043], [4359407.703885194, 2758981.144557228], [4345442.973148657, 2749467.3188659432], [4344173.452172609, 2749467.3188659432], [4330970.434021701, 2745142.852642632], [4328685.296264813, 2750115.9887994397], [4329193.104655232, 2758116.2513125655], [4334525.092754638, 2757467.581379069], [4338079.751487575, 2769792.310115506], [4331224.338216911, 2767846.300315016], [4331224.338216911, 2777143.9026951347], [4335286.805340267, 2778873.689184459], [4341126.601830091, 2790765.971298565], [4342903.931196559, 2789901.078053903], [4342903.931196559, 2785792.835141757], [4347220.302515126, 2784495.4952747636], [4359661.608080404, 2790333.5246762335], [4363724.07520376, 2788819.961498075]]]}}, {"type": "Feature", "properties": {"id": "DE27D", "na": "Donau-Ries", "AGS": "09779"}, "geometry": {"type": "Polygon", "coordinates": [[[4368040.446522326, 2878336.4123206157], [4368040.446522326, 2874444.3927196357], [4371341.201060053, 2872065.936296815], [4370833.392669633, 2866876.576828841], [4374134.147207361, 2865579.236961848], [4380989.560478024, 2870984.819740987], [4382005.177258863, 2867309.0234511727], [4380735.656282814, 2865579.236961848], [4389876.2073103655, 2861470.994049703], [4394954.291214561, 2856930.304515226], [4392923.057652882, 2855632.9646482323], [4393430.866043302, 2842659.565978299], [4397493.333166658, 2837470.2065103254], [4396477.716385819, 2834659.303465173], [4389114.494724736, 2830767.283864193], [4386575.452772639, 2832064.6237311866], [4386067.644382219, 2836389.0899544978], [4378450.518525926, 2834226.856842842], [4366770.925546277, 2841578.449422471], [4369563.871693585, 2846767.808890444], [4361692.841642082, 2848713.818690934], [4356868.661933096, 2842659.565978299], [4352044.4822241105, 2848065.148757438], [4354583.524176208, 2867309.0234511727], [4351028.8654432725, 2873795.722786139], [4355345.236761838, 2877687.742387119], [4360931.129056453, 2877255.295764788], [4361692.841642082, 2880282.4221211057], [4365247.500375018, 2878336.4123206157], [4368040.446522326, 2878336.4123206157]]]}}, {"type": "Feature", "properties": {"id": "DE27E", "na": "Oberallg\u00c3\u00a4u", "AGS": "09780"}, "geometry": {"type": "Polygon", "coordinates": [[[4345442.973148657, 2749467.3188659432], [4348235.919295965, 2744277.95939797], [4353567.907395369, 2742980.6195309767], [4355345.236761838, 2734980.357017851], [4359407.703885194, 2728277.434371718], [4355345.236761838, 2715952.7056352817], [4353567.907395369, 2710114.6762338113], [4355853.045152257, 2707736.2198109906], [4356868.661933096, 2702114.413720686], [4344935.164758238, 2688059.8984949244], [4334525.092754638, 2684167.8788939444], [4338587.559877994, 2696708.8309415467], [4328431.392069603, 2693465.4812740637], [4326400.158507925, 2699303.5106755337], [4328939.200460022, 2701681.967098355], [4327923.583679184, 2705141.5400770037], [4321068.170408521, 2707736.2198109906], [4318529.128456423, 2714655.3657682883], [4325638.4459222965, 2718547.3853692682], [4326907.966898344, 2725034.084704235], [4331478.24241212, 2732169.4539726987], [4325892.3501175055, 2741467.0563528175], [4330970.434021701, 2745142.852642632], [4344173.452172609, 2749467.3188659432], [4345442.973148657, 2749467.3188659432]], [[4348997.631881594, 2733466.793839692], [4348743.727686385, 2738872.376618831], [4343157.835391769, 2739304.823241162], [4338841.4640732035, 2739737.269863493], [4339603.176658833, 2733466.793839692], [4342396.12280614, 2731520.784039202], [4348997.631881594, 2733466.793839692]]]}}, {"type": "Feature", "properties": {"id": "DE300", "na": "Berlin", "AGS": "11000"}, "geometry": {"type": "Polygon", "coordinates": [[[4565831.81459073, 3276619.7514875745], [4569132.5691284565, 3274673.7416870845], [4568116.952347618, 3269484.3822191106], [4570148.185909295, 3269051.93559678], [4575480.174008701, 3264943.692684634], [4572941.132056603, 3258456.9933496676], [4569132.5691284565, 3254132.527126356], [4569386.473323666, 3257159.653482674], [4565577.91039552, 3259970.556527826], [4557706.8803440165, 3259754.3332166607], [4553644.413220661, 3261051.673083654], [4553898.317415871, 3257375.87679384], [4550343.658682934, 3259105.663283164], [4546281.191559577, 3259538.1099054953], [4540441.395069754, 3261700.3430171506], [4536378.927946397, 3258456.9933496676], [4531046.9398469925, 3261051.673083654], [4535109.406970348, 3270565.4987749388], [4535871.119555978, 3271430.3920196006], [4532570.36501825, 3272079.0619530976], [4533078.17340867, 3279863.1011550575], [4535363.311165558, 3281376.664333217], [4538917.969898495, 3280295.5477773887], [4537902.353117656, 3282241.557577879], [4538917.969898495, 3284620.0140007], [4550851.467073353, 3287430.917045852], [4555929.550977549, 3289809.3734686733], [4558722.497124856, 3281592.887644382], [4565831.81459073, 3276619.7514875745]]]}}, {"type": "Feature", "properties": {"id": "DE401", "na": "Brandenburg an der Havel, Kreisfreie Stadt", "AGS": "12051"}, "geometry": {"type": "Polygon", "coordinates": [[[4481535.621781088, 3261916.5663283165], [4486105.897294864, 3263646.3528176406], [4486359.801490074, 3259105.663283164], [4503879.190959548, 3269700.6055302764], [4495754.256712835, 3264727.4693734683], [4502609.669983499, 3263213.90619531], [4503625.286764339, 3259105.663283164], [4491691.78958948, 3248726.944347217], [4485851.993099655, 3247429.6044802237], [4481535.621781088, 3261916.5663283165]]]}}, {"type": "Feature", "properties": {"id": "DE402", "na": "Cottbus, Kreisfreie Stadt", "AGS": "12052"}, "geometry": {"type": "Polygon", "coordinates": [[[4628038.342417121, 3186238.4074203707], [4618136.07880394, 3185589.737486874], [4616104.845242262, 3189481.7570878547], [4615597.036851842, 3195752.2331116553], [4617120.462023101, 3203320.04900245], [4618389.98299915, 3202887.6023801193], [4631339.096954848, 3195103.563178159], [4623975.875293765, 3191643.99019951], [4628292.246612331, 3188400.6405320265], [4628038.342417121, 3186238.4074203707]]]}}, {"type": "Feature", "properties": {"id": "DE403", "na": "Frankfurt (Oder), Kreisfreie Stadt", "AGS": "12053"}, "geometry": {"type": "Polygon", "coordinates": [[[4634893.755687784, 3250240.507525376], [4620929.0249512475, 3248726.944347217], [4621944.641732086, 3260835.4497724883], [4627784.438221911, 3263213.90619531], [4629561.767588379, 3263646.3528176406], [4634893.755687784, 3250240.507525376]]]}}, {"type": "Feature", "properties": {"id": "DE404", "na": "Potsdam, Kreisfreie Stadt", "AGS": "12054"}, "geometry": {"type": "Polygon", "coordinates": [[[4535109.406970348, 3270565.4987749388], [4531046.9398469925, 3261051.673083654], [4536378.927946397, 3258456.9933496676], [4534601.598579928, 3253700.0805040253], [4526984.472723636, 3252835.187259363], [4521906.388819441, 3257808.3234161707], [4521144.676233811, 3264295.0227511376], [4517590.017500875, 3265159.9159958], [4521144.676233811, 3270133.0521526076], [4526222.760138007, 3269484.3822191106], [4529015.706285315, 3265592.3626181306], [4535109.406970348, 3270565.4987749388]]]}}, {"type": "Feature", "properties": {"id": "DE405", "na": "Barnim", "AGS": "12060"}, "geometry": {"type": "Polygon", "coordinates": [[[4599347.168358417, 3324837.5498774936], [4600616.689334467, 3317702.1806090306], [4598839.359967998, 3316837.2873643683], [4595030.797039852, 3317702.1806090306], [4594269.084454223, 3314242.6076303814], [4597315.934796739, 3314458.8309415467], [4590714.425721286, 3313161.4910745537], [4581573.874693735, 3301485.4322716137], [4572941.132056603, 3298025.8592929645], [4576749.694984749, 3290890.4900245015], [4581066.066303315, 3294133.8396919845], [4581319.970498525, 3290241.8200910045], [4565831.81459073, 3276619.7514875745], [4558722.497124856, 3281592.887644382], [4555929.550977549, 3289809.3734686733], [4550851.467073353, 3287430.917045852], [4552120.988049403, 3294350.06300315], [4550597.562878144, 3301052.985649282], [4551613.179658983, 3304945.0052502626], [4556437.3593679685, 3305809.8984949244], [4560245.922296114, 3311647.927896395], [4549328.041902095, 3319215.743787189], [4557199.0719535975, 3325702.443122156], [4581319.970498525, 3334135.152257613], [4577765.311765589, 3326783.5596779836], [4590460.521526076, 3321161.753587679], [4599347.168358417, 3324837.5498774936]]]}}, {"type": "Feature", "properties": {"id": "DE406", "na": "Dahme-Spreewald", "AGS": "12061"}, "geometry": {"type": "Polygon", "coordinates": [[[4572941.132056603, 3258456.9933496676], [4574718.461423071, 3259538.1099054953], [4578527.024351217, 3252618.9639481977], [4583859.012450622, 3249159.3909695484], [4584366.820841042, 3246348.487924396], [4582081.6830841545, 3243970.0315015754], [4584112.916645832, 3230564.1862093103], [4592491.755087754, 3232510.196009801], [4604679.156457823, 3223428.816940847], [4609757.240362018, 3225591.0500525027], [4613819.707485374, 3222131.477073854], [4619405.59977999, 3226888.389919496], [4626007.108855443, 3222131.477073854], [4620929.0249512475, 3219104.3507175357], [4622960.258512925, 3211968.9814490722], [4611534.569728486, 3207644.5152257616], [4611026.761338066, 3203752.495624781], [4608233.8151907595, 3202238.9324466223], [4602394.018700935, 3204401.1655582776], [4595030.797039852, 3206347.1753587676], [4586905.86279314, 3205049.8354917746], [4584620.725036252, 3201157.8158907946], [4585382.43762188, 3189914.2037101854], [4583351.204060202, 3187535.747287364], [4581573.874693735, 3189914.2037101854], [4566085.71878594, 3187751.97059853], [4562784.964248212, 3192725.1067553377], [4567101.335566778, 3194887.339866993], [4564562.29361468, 3200941.5925796293], [4567355.239761988, 3203968.718935947], [4563038.868443422, 3208076.9618480923], [4555675.646782339, 3207644.5152257616], [4555675.646782339, 3212833.8746937346], [4561007.634881744, 3211968.9814490722], [4571163.802690134, 3217590.787539377], [4571417.706885344, 3221699.030451522], [4563546.676833842, 3226672.1666083303], [4563292.772638632, 3237483.3321666084], [4565831.81459073, 3237915.778788939], [4563038.868443422, 3242888.9149457472], [4557199.0719535975, 3242240.2450122507], [4560499.826491324, 3245483.5946797337], [4559484.209710485, 3253267.6338816937], [4553898.317415871, 3257375.87679384], [4553644.413220661, 3261051.673083654], [4557706.8803440165, 3259754.3332166607], [4565577.91039552, 3259970.556527826], [4569386.473323666, 3257159.653482674], [4569132.5691284565, 3254132.527126356], [4572941.132056603, 3258456.9933496676]]]}}, {"type": "Feature", "properties": {"id": "DE407", "na": "Elbe-Elster", "AGS": "12062"}, "geometry": {"type": "Polygon", "coordinates": [[[4562784.964248212, 3192725.1067553377], [4566085.71878594, 3187751.97059853], [4581573.874693735, 3189914.2037101854], [4583351.204060202, 3187535.747287364], [4590206.617330866, 3174778.571928596], [4588175.383769188, 3168508.0959047955], [4583097.2998649925, 3164832.299614981], [4574464.557227861, 3163967.4063703185], [4573195.036251812, 3161156.503325166], [4579542.641132057, 3154669.803990199], [4578019.215960798, 3146885.7647882393], [4567101.335566778, 3147101.9880994046], [4558214.688734436, 3153156.240812041], [4544249.9579978995, 3148615.551277564], [4543488.245412271, 3162021.3965698285], [4539425.778288914, 3170237.8823941196], [4534855.502775138, 3170886.552327616], [4532062.556627831, 3175211.0185509278], [4539679.682484124, 3180400.3780189008], [4539171.874093704, 3192725.1067553377], [4536125.023751188, 3198779.359467973], [4537902.353117656, 3198995.582779139], [4540949.203460173, 3201806.485824291], [4545519.478973948, 3194887.339866993], [4552120.988049403, 3196617.1263563177], [4562784.964248212, 3192725.1067553377]]]}}, {"type": "Feature", "properties": {"id": "DE408", "na": "Havelland", "AGS": "12063"}, "geometry": {"type": "Polygon", "coordinates": [[[4512258.02940147, 3291106.713335667], [4521144.676233811, 3294133.8396919845], [4534601.598579928, 3284620.0140007], [4535363.311165558, 3281376.664333217], [4533078.17340867, 3279863.1011550575], [4532570.36501825, 3272079.0619530976], [4535871.119555978, 3271430.3920196006], [4535109.406970348, 3270565.4987749388], [4529015.706285315, 3265592.3626181306], [4526222.760138007, 3269484.3822191106], [4521144.676233811, 3270133.0521526076], [4517590.017500875, 3265159.9159958], [4507433.849692484, 3264511.246062303], [4508449.466473323, 3267105.92579629], [4505148.711935597, 3274241.295064753], [4489406.651832592, 3274241.295064753], [4485598.088904445, 3274457.5183759187], [4485598.088904445, 3267538.3724186206], [4487375.418270914, 3266024.8092404623], [4486105.897294864, 3263646.3528176406], [4481535.621781088, 3261916.5663283165], [4478488.771438572, 3262997.682884144], [4479250.484024201, 3265808.5859292964], [4474172.400120006, 3269916.8288414422], [4468332.603630181, 3268619.4889744488], [4466301.370068504, 3271862.8386419322], [4472141.166558328, 3282457.7808890445], [4472395.070753537, 3286998.470423521], [4469602.12460623, 3293268.946447322], [4470363.837191859, 3298458.3059152956], [4472648.974948747, 3300404.315715786], [4482551.238561928, 3301917.8788939444], [4481535.621781088, 3298242.0826041303], [4491945.6937846895, 3296296.07280364], [4492707.4063703185, 3303215.218760938], [4496515.969298465, 3302350.325516276], [4506164.3287164355, 3291755.3832691633], [4512258.02940147, 3291106.713335667]]]}}, {"type": "Feature", "properties": {"id": "DE409", "na": "M\u00c3\u00a4rkisch-Oderland", "AGS": "12064"}, "geometry": {"type": "Polygon", "coordinates": [[[4600616.689334467, 3317702.1806090306], [4599093.264163208, 3310350.5880294014], [4614581.420071004, 3302350.325516276], [4620929.0249512475, 3294782.5096254814], [4629815.671783589, 3289160.703535177], [4635401.564078204, 3283538.897444872], [4633116.4263213165, 3279214.431221561], [4635655.468273413, 3275322.411620581], [4629561.767588379, 3263646.3528176406], [4627784.438221911, 3263213.90619531], [4621944.641732086, 3260835.4497724883], [4614581.420071004, 3261267.89639482], [4611280.665533276, 3268835.7122856146], [4605186.964848243, 3273592.6251312564], [4604679.156457823, 3270349.275463773], [4585890.2460123, 3269916.8288414422], [4581066.066303315, 3265592.3626181306], [4576749.694984749, 3266241.0325516276], [4572941.132056603, 3272295.285264263], [4570148.185909295, 3269051.93559678], [4568116.952347618, 3269484.3822191106], [4569132.5691284565, 3274673.7416870845], [4565831.81459073, 3276619.7514875745], [4581319.970498525, 3290241.8200910045], [4581066.066303315, 3294133.8396919845], [4576749.694984749, 3290890.4900245015], [4572941.132056603, 3298025.8592929645], [4581573.874693735, 3301485.4322716137], [4590714.425721286, 3313161.4910745537], [4597315.934796739, 3314458.8309415467], [4594269.084454223, 3314242.6076303814], [4595030.797039852, 3317702.1806090306], [4598839.359967998, 3316837.2873643683], [4600616.689334467, 3317702.1806090306]]]}}, {"type": "Feature", "properties": {"id": "DE40A", "na": "Oberhavel", "AGS": "12065"}, "geometry": {"type": "Polygon", "coordinates": [[[4537394.544727236, 3351865.4637731886], [4542472.628631432, 3346027.434371718], [4540949.203460173, 3341486.7448372417], [4549581.946097305, 3329378.2394119706], [4557199.0719535975, 3325702.443122156], [4549328.041902095, 3319215.743787189], [4560245.922296114, 3311647.927896395], [4556437.3593679685, 3305809.8984949244], [4551613.179658983, 3304945.0052502626], [4550597.562878144, 3301052.985649282], [4552120.988049403, 3294350.06300315], [4550851.467073353, 3287430.917045852], [4538917.969898495, 3284620.0140007], [4537902.353117656, 3282241.557577879], [4538917.969898495, 3280295.5477773887], [4535363.311165558, 3281376.664333217], [4534601.598579928, 3284620.0140007], [4521144.676233811, 3294133.8396919845], [4512258.02940147, 3291106.713335667], [4518351.7300865045, 3296728.5194259714], [4518097.8258912945, 3301917.8788939444], [4521906.388819441, 3305161.228561428], [4525968.855942797, 3316404.8407420367], [4526476.664333217, 3320729.3069653483], [4523683.718185909, 3333486.482324116], [4517590.017500875, 3336946.055302765], [4521906.388819441, 3342351.638081904], [4520636.867843392, 3343648.9779488975], [4531300.844042202, 3353162.803640182], [4537394.544727236, 3351865.4637731886]]]}}, {"type": "Feature", "properties": {"id": "DE40B", "na": "Oberspreewald-Lausitz", "AGS": "12066"}, "geometry": {"type": "Polygon", "coordinates": [[[4602394.018700935, 3204401.1655582776], [4601632.306115305, 3198563.1361568077], [4604679.156457823, 3194238.6699334965], [4605440.869043453, 3185805.96079804], [4603917.443872193, 3181697.7178858942], [4611788.473923696, 3175427.241862093], [4609757.240362018, 3167210.7560378015], [4605948.677433872, 3164832.299614981], [4599093.264163208, 3148831.7745887293], [4587921.479573978, 3147750.6580329016], [4578019.215960798, 3146885.7647882393], [4579542.641132057, 3154669.803990199], [4573195.036251812, 3161156.503325166], [4574464.557227861, 3163967.4063703185], [4583097.2998649925, 3164832.299614981], [4588175.383769188, 3168508.0959047955], [4590206.617330866, 3174778.571928596], [4583351.204060202, 3187535.747287364], [4585382.43762188, 3189914.2037101854], [4584620.725036252, 3201157.8158907946], [4586905.86279314, 3205049.8354917746], [4595030.797039852, 3206347.1753587676], [4602394.018700935, 3204401.1655582776]]]}}, {"type": "Feature", "properties": {"id": "DE40C", "na": "Oder-Spree", "AGS": "12067"}, "geometry": {"type": "Polygon", "coordinates": [[[4621944.641732086, 3260835.4497724883], [4620929.0249512475, 3248726.944347217], [4634893.755687784, 3250240.507525376], [4643018.689934497, 3246564.7112355614], [4641495.264763238, 3233158.865943297], [4646827.252862643, 3228401.9530976545], [4644542.115105756, 3220617.9138956945], [4635655.468273413, 3223645.040252012], [4629815.671783589, 3220401.690584529], [4628038.342417121, 3224509.9334966745], [4626007.108855443, 3222131.477073854], [4619405.59977999, 3226888.389919496], [4613819.707485374, 3222131.477073854], [4609757.240362018, 3225591.0500525027], [4604679.156457823, 3223428.816940847], [4592491.755087754, 3232510.196009801], [4584112.916645832, 3230564.1862093103], [4582081.6830841545, 3243970.0315015754], [4584366.820841042, 3246348.487924396], [4583859.012450622, 3249159.3909695484], [4578527.024351217, 3252618.9639481977], [4574718.461423071, 3259538.1099054953], [4572941.132056603, 3258456.9933496676], [4575480.174008701, 3264943.692684634], [4570148.185909295, 3269051.93559678], [4572941.132056603, 3272295.285264263], [4576749.694984749, 3266241.0325516276], [4581066.066303315, 3265592.3626181306], [4585890.2460123, 3269916.8288414422], [4604679.156457823, 3270349.275463773], [4605186.964848243, 3273592.6251312564], [4611280.665533276, 3268835.7122856146], [4614581.420071004, 3261267.89639482], [4621944.641732086, 3260835.4497724883]]]}}, {"type": "Feature", "properties": {"id": "DE40D", "na": "Ostprignitz-Ruppin", "AGS": "12068"}, "geometry": {"type": "Polygon", "coordinates": [[[4476457.537876894, 3359217.0563528175], [4484074.663733186, 3351865.4637731886], [4498039.394469723, 3352946.5803290163], [4505656.5203260165, 3345811.211060553], [4519113.442672133, 3347540.9975498775], [4520129.059452972, 3346459.88099405], [4517590.017500875, 3344730.094504725], [4520636.867843392, 3343648.9779488975], [4521906.388819441, 3342351.638081904], [4517590.017500875, 3336946.055302765], [4523683.718185909, 3333486.482324116], [4526476.664333217, 3320729.3069653483], [4525968.855942797, 3316404.8407420367], [4521906.388819441, 3305161.228561428], [4518097.8258912945, 3301917.8788939444], [4518351.7300865045, 3296728.5194259714], [4512258.02940147, 3291106.713335667], [4506164.3287164355, 3291755.3832691633], [4496515.969298465, 3302350.325516276], [4492707.4063703185, 3303215.218760938], [4491945.6937846895, 3296296.07280364], [4481535.621781088, 3298242.0826041303], [4482551.238561928, 3301917.8788939444], [4472648.974948747, 3300404.315715786], [4471379.453972698, 3307972.13160658], [4464016.232311616, 3307107.2383619184], [4464016.232311616, 3311215.4812740637], [4474680.208510425, 3314675.0542527125], [4476965.346267313, 3322891.5400770037], [4483312.951147557, 3324405.103255163], [4482805.142757138, 3329594.462723136], [4478742.675633782, 3325486.2198109906], [4474426.304315216, 3330459.3559677983], [4474426.304315216, 3339108.2884144206], [4476965.346267313, 3341919.191459573], [4477727.058852943, 3350351.90059503], [4474426.304315216, 3357487.269863493], [4475949.729486475, 3359433.279663983], [4476457.537876894, 3359217.0563528175]]]}}, {"type": "Feature", "properties": {"id": "DE40E", "na": "Potsdam-Mittelmark", "AGS": "12069"}, "geometry": {"type": "Polygon", "coordinates": [[[4517590.017500875, 3265159.9159958], [4521144.676233811, 3264295.0227511376], [4521906.388819441, 3257808.3234161707], [4526984.472723636, 3252835.187259363], [4534601.598579928, 3253700.0805040253], [4536378.927946397, 3258456.9933496676], [4540441.395069754, 3261700.3430171506], [4546281.191559577, 3259538.1099054953], [4542472.628631432, 3251754.0707035353], [4535109.406970348, 3247645.8277913895], [4531808.652432621, 3236402.2156107808], [4524445.430771539, 3230347.962898145], [4525714.951747587, 3224509.9334966745], [4523937.622381119, 3218888.1274063704], [4511242.412620631, 3211320.3115155757], [4503371.382569129, 3214779.8844942246], [4495500.352517625, 3211320.3115155757], [4484836.376318816, 3217590.787539377], [4484074.663733186, 3217590.787539377], [4479758.2924146205, 3222780.1470073503], [4476965.346267313, 3224077.486874344], [4472648.974948747, 3231212.856142807], [4477980.963048153, 3237699.555477774], [4474172.400120006, 3239861.788589429], [4478234.867243363, 3250889.177458873], [4476965.346267313, 3259538.1099054953], [4478488.771438572, 3262997.682884144], [4481535.621781088, 3261916.5663283165], [4485851.993099655, 3247429.6044802237], [4491691.78958948, 3248726.944347217], [4503625.286764339, 3259105.663283164], [4502609.669983499, 3263213.90619531], [4495754.256712835, 3264727.4693734683], [4503879.190959548, 3269700.6055302764], [4486359.801490074, 3259105.663283164], [4486105.897294864, 3263646.3528176406], [4487375.418270914, 3266024.8092404623], [4485598.088904445, 3267538.3724186206], [4485598.088904445, 3274457.5183759187], [4489406.651832592, 3274241.295064753], [4505148.711935597, 3274241.295064753], [4508449.466473323, 3267105.92579629], [4507433.849692484, 3264511.246062303], [4517590.017500875, 3265159.9159958]]]}}, {"type": "Feature", "properties": {"id": "DE40F", "na": "Prignitz", "AGS": "12070"}, "geometry": {"type": "Polygon", "coordinates": [[[4475949.729486475, 3359433.279663983], [4474426.304315216, 3357487.269863493], [4477727.058852943, 3350351.90059503], [4476965.346267313, 3341919.191459573], [4474426.304315216, 3339108.2884144206], [4474426.304315216, 3330459.3559677983], [4478742.675633782, 3325486.2198109906], [4482805.142757138, 3329594.462723136], [4483312.951147557, 3324405.103255163], [4476965.346267313, 3322891.5400770037], [4474680.208510425, 3314675.0542527125], [4464016.232311616, 3311215.4812740637], [4448528.07640382, 3311215.4812740637], [4443703.896694834, 3313810.1610080507], [4445227.321866093, 3317269.733986699], [4430246.974348717, 3323756.433321666], [4431008.686934346, 3326783.5596779836], [4428215.7407870395, 3326351.113055653], [4418313.477173858, 3330891.8025901294], [4410696.351317566, 3328297.122856143], [4405618.26741337, 3335648.7154357717], [4423645.465273264, 3336297.3853692682], [4425930.603030152, 3340838.074903745], [4424661.082054103, 3345594.9877493875], [4434563.345667283, 3349703.230661533], [4436594.579228962, 3346892.3276163805], [4443196.088304415, 3348189.667483374], [4455637.393869693, 3356406.153307665], [4457922.531626581, 3362027.95939797], [4457160.819040952, 3364406.415820791], [4459192.05260263, 3364406.415820791], [4475949.729486475, 3359433.279663983]]]}}, {"type": "Feature", "properties": {"id": "DE40G", "na": "Spree-Nei\u00c3\u0178e", "AGS": "12071"}, "geometry": {"type": "Polygon", "coordinates": [[[4644542.115105756, 3220617.9138956945], [4645303.827691385, 3214131.214560728], [4643780.402520126, 3209374.3017150857], [4637178.893444672, 3200076.699334967], [4641241.360568028, 3197482.01960098], [4643272.594129706, 3189914.2037101854], [4649620.19900995, 3183643.727686384], [4650889.719985999, 3177157.0283514177], [4648604.582229111, 3174129.9019950996], [4647081.157057853, 3175643.4651732584], [4645049.923496175, 3170454.1057052854], [4637432.797639882, 3173265.0087504378], [4629307.863393169, 3168508.0959047955], [4622198.545927296, 3165264.7462373115], [4609757.240362018, 3167210.7560378015], [4611788.473923696, 3175427.241862093], [4603917.443872193, 3181697.7178858942], [4605440.869043453, 3185805.96079804], [4604679.156457823, 3194238.6699334965], [4601632.306115305, 3198563.1361568077], [4602394.018700935, 3204401.1655582776], [4608233.8151907595, 3202238.9324466223], [4611026.761338066, 3203752.495624781], [4611534.569728486, 3207644.5152257616], [4622960.258512925, 3211968.9814490722], [4620929.0249512475, 3219104.3507175357], [4626007.108855443, 3222131.477073854], [4628038.342417121, 3224509.9334966745], [4629815.671783589, 3220401.690584529], [4635655.468273413, 3223645.040252012], [4644542.115105756, 3220617.9138956945]], [[4628038.342417121, 3186238.4074203707], [4628292.246612331, 3188400.6405320265], [4623975.875293765, 3191643.99019951], [4631339.096954848, 3195103.563178159], [4618389.98299915, 3202887.6023801193], [4617120.462023101, 3203320.04900245], [4615597.036851842, 3195752.2331116553], [4616104.845242262, 3189481.7570878547], [4618136.07880394, 3185589.737486874], [4628038.342417121, 3186238.4074203707]]]}}, {"type": "Feature", "properties": {"id": "DE40H", "na": "Teltow-Fl\u00c3\u00a4ming", "AGS": "12072"}, "geometry": {"type": "Polygon", "coordinates": [[[4553898.317415871, 3257375.87679384], [4559484.209710485, 3253267.6338816937], [4560499.826491324, 3245483.5946797337], [4557199.0719535975, 3242240.2450122507], [4563038.868443422, 3242888.9149457472], [4565831.81459073, 3237915.778788939], [4563292.772638632, 3237483.3321666084], [4563546.676833842, 3226672.1666083303], [4571417.706885344, 3221699.030451522], [4571163.802690134, 3217590.787539377], [4561007.634881744, 3211968.9814490722], [4555675.646782339, 3212833.8746937346], [4555675.646782339, 3207644.5152257616], [4563038.868443422, 3208076.9618480923], [4567355.239761988, 3203968.718935947], [4564562.29361468, 3200941.5925796293], [4567101.335566778, 3194887.339866993], [4562784.964248212, 3192725.1067553377], [4552120.988049403, 3196617.1263563177], [4545519.478973948, 3194887.339866993], [4540949.203460173, 3201806.485824291], [4537902.353117656, 3198995.582779139], [4530539.131456573, 3199860.476023801], [4525461.047552377, 3203103.8256912846], [4524445.430771539, 3206995.8452922646], [4517082.209110456, 3206563.3986699334], [4516320.496524826, 3210239.1949597476], [4511242.412620631, 3211320.3115155757], [4523937.622381119, 3218888.1274063704], [4525714.951747587, 3224509.9334966745], [4524445.430771539, 3230347.962898145], [4531808.652432621, 3236402.2156107808], [4535109.406970348, 3247645.8277913895], [4542472.628631432, 3251754.0707035353], [4546281.191559577, 3259538.1099054953], [4550343.658682934, 3259105.663283164], [4553898.317415871, 3257375.87679384]]]}}, {"type": "Feature", "properties": {"id": "DE40I", "na": "Uckermark", "AGS": "12073"}, "geometry": {"type": "Polygon", "coordinates": [[[4614835.324266213, 3366784.872243612], [4617120.462023101, 3358568.386419321], [4613311.899094954, 3352514.133706685], [4612804.090704535, 3349270.784039202], [4614327.515875794, 3346027.434371718], [4613057.994899744, 3337594.7252362617], [4599347.168358417, 3324837.5498774936], [4590460.521526076, 3321161.753587679], [4577765.311765589, 3326783.5596779836], [4581319.970498525, 3334135.152257613], [4557199.0719535975, 3325702.443122156], [4549581.946097305, 3329378.2394119706], [4540949.203460173, 3341486.7448372417], [4542472.628631432, 3346027.434371718], [4537394.544727236, 3351865.4637731886], [4540949.203460173, 3357487.269863493], [4548312.425121256, 3355541.260063003], [4553136.604830241, 3359217.0563528175], [4555675.646782339, 3362676.6293314667], [4557199.0719535975, 3371541.7850892544], [4567101.335566778, 3380839.3874693736], [4574972.365618281, 3383434.06720336], [4571417.706885344, 3384947.630381519], [4572687.227861393, 3388623.4266713336], [4582843.395669783, 3376298.6979348967], [4602901.827091355, 3376514.921246062], [4601886.210310515, 3369163.328666433], [4594269.084454223, 3358135.93979699], [4605440.869043453, 3358568.386419321], [4608487.7193859685, 3364622.6391319567], [4614835.324266213, 3366784.872243612]]]}}, {"type": "Feature", "properties": {"id": "DE501", "na": "Bremen, Kreisfreie Stadt", "AGS": "04011"}, "geometry": {"type": "Polygon", "coordinates": [[[4248197.666383319, 3323107.7633881695], [4239057.115355767, 3326351.113055653], [4234486.839841992, 3326999.7829891494], [4231947.797889894, 3333486.482324116], [4230932.181109056, 3334135.152257613], [4228647.043352168, 3340621.85159258], [4219760.396519826, 3347540.9975498775], [4222807.246862343, 3346243.657682884], [4253021.846092304, 3335864.9387469376], [4250482.804140206, 3334783.8221911094], [4252514.037701885, 3326783.5596779836], [4248197.666383319, 3323107.7633881695]]]}}, {"type": "Feature", "properties": {"id": "DE502", "na": "Bremerhaven, Kreisfreie Stadt", "AGS": "04012"}, "geometry": {"type": "Polygon", "coordinates": [[[4221029.917495875, 3374785.134756738], [4225092.38461923, 3380623.164158208], [4224330.672033601, 3382352.950647532], [4223061.151057553, 3384515.183759188], [4221283.821691085, 3387974.7567378366], [4220522.109105455, 3389055.8732936643], [4223061.151057553, 3389704.5432271613], [4227885.330766538, 3388190.9800490024], [4231693.893694685, 3389055.8732936643], [4231693.893694685, 3379542.04760238], [4221029.917495875, 3374785.134756738]]]}}, {"type": "Feature", "properties": {"id": "DE600", "na": "Hamburg", "AGS": "02000"}, "geometry": {"type": "Polygon", "coordinates": [[[4336810.230511526, 3376514.921246062], [4342650.02700135, 3371325.561778089], [4341380.506025301, 3369595.7752887644], [4332493.85919296, 3365487.532376619], [4324368.924946247, 3372839.124956248], [4315482.278113905, 3367433.542177109], [4314466.661333066, 3372190.4550227514], [4311927.619380969, 3369163.328666433], [4306595.631281564, 3376947.3678683937], [4305580.014500725, 3377596.0378018897], [4303040.972548627, 3383434.06720336], [4305833.918695934, 3391218.10640532], [4309388.577428872, 3386244.9702485125], [4317513.511675583, 3394029.0094504724], [4325638.4459222965, 3396839.9124956247], [4325892.3501175055, 3400299.4854742736], [4333509.475973799, 3401596.825341267], [4330208.721436072, 3397056.1358067906], [4335794.613730687, 3391866.7763388166], [4334271.188559428, 3386244.9702485125], [4330970.434021701, 3385380.07700385], [4330970.434021701, 3381920.5040252013], [4336810.230511526, 3376514.921246062]]]}}, {"type": "Feature", "properties": {"id": "DE711", "na": "Darmstadt, Kreisfreie Stadt", "AGS": "06411"}, "geometry": {"type": "Polygon", "coordinates": [[[4225854.09720486, 2982988.4949247465], [4229662.660133006, 2983204.718235912], [4230170.468523426, 2982772.2716135806], [4231186.085304265, 2977366.688834442], [4225854.09720486, 2966771.7465873295], [4220014.300715036, 2970447.5428771437], [4222553.342667134, 2981907.3783689183], [4225854.09720486, 2982988.4949247465]]]}}, {"type": "Feature", "properties": {"id": "DE712", "na": "Frankfurt am Main, Kreisfreie Stadt", "AGS": "06412"}, "geometry": {"type": "Polygon", "coordinates": [[[4234486.839841992, 3007854.1757087857], [4233725.127256363, 3003529.709485474], [4229916.564328216, 3000286.359817991], [4229154.851742587, 2995313.223661183], [4222553.342667134, 2994448.330416521], [4220014.300715036, 2990340.0875043753], [4214936.21681084, 2990772.5341267064], [4217729.162958148, 2994015.8837941894], [4216459.641982099, 2997475.4567728387], [4215190.12100605, 2995529.4469723487], [4211889.366468323, 3000718.8064403217], [4220268.204910246, 3006124.389219461], [4229154.851742587, 3013475.98179909], [4229662.660133006, 3013259.758487924], [4230424.372718636, 3010881.3020651033], [4228393.139156958, 3008502.845642282], [4229662.660133006, 3006556.8358417917], [4234486.839841992, 3007854.1757087857]]]}}, {"type": "Feature", "properties": {"id": "DE713", "na": "Offenbach am Main, Kreisfreie Stadt", "AGS": "06413"}, "geometry": {"type": "Polygon", "coordinates": [[[4236518.0734036695, 3003097.2628631433], [4237787.594379719, 2995961.8935946794], [4229154.851742587, 2995313.223661183], [4229916.564328216, 3000286.359817991], [4233725.127256363, 3003529.709485474], [4236518.0734036695, 3003097.2628631433]]]}}, {"type": "Feature", "properties": {"id": "DE714", "na": "Wiesbaden, Kreisfreie Stadt", "AGS": "06414"}, "geometry": {"type": "Polygon", "coordinates": [[[4201479.294464723, 3005043.2726636333], [4205541.76158808, 2997907.9033951694], [4201225.390269513, 2988826.5243262164], [4198178.539926996, 2988394.077703885], [4195131.689584479, 2992069.8739936994], [4191323.126656333, 2992934.7672383618], [4190307.5098754936, 2992934.7672383618], [4185991.1385569274, 2999637.689884494], [4195385.593779689, 3005475.719285964], [4201479.294464723, 3005043.2726636333]]]}}, {"type": "Feature", "properties": {"id": "DE715", "na": "Bergstra\u00c3\u0178e", "AGS": "06431"}, "geometry": {"type": "MultiPolygon", "coordinates": [[[[4241342.253112655, 2930878.6769338464], [4243627.390869543, 2929148.8904445223], [4244896.911845592, 2927419.1039551976], [4237533.690184509, 2920932.404620231], [4233979.031451573, 2922662.191109556], [4236010.2650132505, 2929365.113755688], [4241342.253112655, 2930878.6769338464]]], [[[4234232.935646782, 2959203.930696535], [4234232.935646782, 2954230.7945397273], [4240580.540527026, 2949906.3283164157], [4240072.732136607, 2940176.2793139657], [4242103.965698285, 2934986.9198459922], [4241342.253112655, 2932824.6867343364], [4227123.618180909, 2936716.7063353164], [4225092.38461923, 2945149.4154707734], [4226615.809790489, 2946014.3087154357], [4218998.683934197, 2944500.745537277], [4221283.821691085, 2937797.8228911445], [4218236.971348567, 2935203.143157158], [4210873.749687484, 2942338.512425621], [4206811.282564128, 2942338.512425621], [4206303.474173709, 2943635.8522926145], [4202494.911245562, 2954447.0178508926], [4209096.420321016, 2958771.4840742038], [4209096.420321016, 2958987.707385369], [4217221.354567728, 2958339.0374518726], [4225346.28881444, 2957906.5908295414], [4227631.426571328, 2960933.7171858596], [4229662.660133006, 2957690.3675183756], [4234232.935646782, 2959203.930696535]]]]}}, {"type": "Feature", "properties": {"id": "DE716", "na": "Darmstadt-Dieburg", "AGS": "06432"}, "geometry": {"type": "Polygon", "coordinates": [[[4252767.941897094, 2973042.22261113], [4251752.325116256, 2970879.989499475], [4249467.187359368, 2971961.1060553025], [4249974.995749787, 2969582.649632482], [4234232.935646782, 2959203.930696535], [4229662.660133006, 2957690.3675183756], [4227631.426571328, 2960933.7171858596], [4225346.28881444, 2957906.5908295414], [4217221.354567728, 2958339.0374518726], [4216713.546177309, 2968717.7563878195], [4214682.312615631, 2974339.562478124], [4217983.067153358, 2982123.601680084], [4222045.534276714, 2984502.058102905], [4225854.09720486, 2982988.4949247465], [4222553.342667134, 2981907.3783689183], [4220014.300715036, 2970447.5428771437], [4225854.09720486, 2966771.7465873295], [4231186.085304265, 2977366.688834442], [4230170.468523426, 2982772.2716135806], [4229662.660133006, 2983204.718235912], [4250482.804140206, 2987096.737836892], [4252767.941897094, 2973042.22261113]]]}}, {"type": "Feature", "properties": {"id": "DE717", "na": "Gro\u00c3\u0178-Gerau", "AGS": "06433"}, "geometry": {"type": "Polygon", "coordinates": [[[4220014.300715036, 2990340.0875043753], [4222045.534276714, 2984502.058102905], [4217983.067153358, 2982123.601680084], [4214682.312615631, 2974339.562478124], [4216713.546177309, 2968717.7563878195], [4217221.354567728, 2958339.0374518726], [4209096.420321016, 2958987.707385369], [4211381.558077903, 2962447.280364018], [4207572.995149758, 2962879.7269863496], [4205795.665783289, 2966987.969898495], [4204780.04900245, 2972825.999299965], [4202241.007050352, 2974988.23241162], [4201987.102855142, 2982339.8249912495], [4198178.539926996, 2988394.077703885], [4201225.390269513, 2988826.5243262164], [4207065.186759338, 2988610.3010150506], [4215190.12100605, 2995529.4469723487], [4216459.641982099, 2997475.4567728387], [4217729.162958148, 2994015.8837941894], [4214936.21681084, 2990772.5341267064], [4220014.300715036, 2990340.0875043753]]]}}, {"type": "Feature", "properties": {"id": "DE718", "na": "Hochtaunuskreis", "AGS": "06434"}, "geometry": {"type": "Polygon", "coordinates": [[[4215444.02520126, 3032936.07980399], [4222045.534276714, 3029908.9534476725], [4229154.851742587, 3013475.98179909], [4220268.204910246, 3006124.389219461], [4203510.528026401, 3009583.96219811], [4204526.14480724, 3011097.5253762687], [4203510.528026401, 3011097.5253762687], [4207319.090954548, 3013475.98179909], [4206557.378368918, 3019097.7878893944], [4203764.432221611, 3021476.2443122156], [4200971.486074303, 3026665.603780189], [4212143.270663533, 3034882.08960448], [4213158.887444372, 3033368.5264263214], [4215444.02520126, 3032936.07980399]]]}}, {"type": "Feature", "properties": {"id": "DE719", "na": "Main-Kinzig-Kreis", "AGS": "06435"}, "geometry": {"type": "Polygon", "coordinates": [[[4283998.157907896, 3036611.876093805], [4289330.1460073, 3030125.176758838], [4302025.355767788, 3027098.05040252], [4302787.068353417, 3022124.9142457126], [4294154.325716286, 3013043.5351767587], [4286283.295664784, 3013692.2051102556], [4285013.774688735, 3012827.3118655933], [4286537.199859993, 2999421.4665733287], [4278412.26561328, 2997475.4567728387], [4276381.032051602, 3002016.146307315], [4266478.768438422, 3003962.1561078057], [4250736.708335416, 3000286.359817991], [4248705.4747737385, 2995529.4469723487], [4241088.348917446, 2997043.0101505076], [4241342.253112655, 3002016.146307315], [4236518.0734036695, 3003097.2628631433], [4233725.127256363, 3003529.709485474], [4234486.839841992, 3007854.1757087857], [4240326.636331816, 3019314.0112005603], [4249721.091554577, 3014340.875043752], [4260385.067753388, 3015421.9915995803], [4270287.331366569, 3036395.652782639], [4270541.235561778, 3039206.5558277913], [4273841.990099505, 3037909.215960798], [4275619.319465973, 3034233.419670983], [4274603.7026851345, 3030557.623381169], [4283998.157907896, 3036611.876093805]]]}}, {"type": "Feature", "properties": {"id": "DE71A", "na": "Main-Taunus-Kreis", "AGS": "06436"}, "geometry": {"type": "Polygon", "coordinates": [[[4220268.204910246, 3006124.389219461], [4211889.366468323, 3000718.8064403217], [4215190.12100605, 2995529.4469723487], [4207065.186759338, 2988610.3010150506], [4201225.390269513, 2988826.5243262164], [4205541.76158808, 2997907.9033951694], [4201479.294464723, 3005043.2726636333], [4203510.528026401, 3011097.5253762687], [4204526.14480724, 3011097.5253762687], [4203510.528026401, 3009583.96219811], [4220268.204910246, 3006124.389219461]]]}}, {"type": "Feature", "properties": {"id": "DE71B", "na": "Odenwaldkreis", "AGS": "06437"}, "geometry": {"type": "Polygon", "coordinates": [[[4251752.325116256, 2970879.989499475], [4259877.259362968, 2959203.930696535], [4255306.983849192, 2953365.901295065], [4254799.175458773, 2943635.8522926145], [4256068.696434822, 2940824.9492474627], [4255053.079653982, 2937365.3762688134], [4257846.02580129, 2934770.6965348264], [4254545.271263563, 2935203.143157158], [4245150.816040802, 2933040.9100455022], [4243627.390869543, 2929148.8904445223], [4241342.253112655, 2930878.6769338464], [4241342.253112655, 2932824.6867343364], [4242103.965698285, 2934986.9198459922], [4240072.732136607, 2940176.2793139657], [4240580.540527026, 2949906.3283164157], [4234232.935646782, 2954230.7945397273], [4234232.935646782, 2959203.930696535], [4249974.995749787, 2969582.649632482], [4249467.187359368, 2971961.1060553025], [4251752.325116256, 2970879.989499475]]]}}, {"type": "Feature", "properties": {"id": "DE71C", "na": "Offenbach, Landkreis", "AGS": "06438"}, "geometry": {"type": "Polygon", "coordinates": [[[4248705.4747737385, 2995529.4469723487], [4247689.8579929, 2993367.213860693], [4251752.325116256, 2992286.0973048653], [4252767.941897094, 2987096.737836892], [4250482.804140206, 2987096.737836892], [4229662.660133006, 2983204.718235912], [4225854.09720486, 2982988.4949247465], [4222045.534276714, 2984502.058102905], [4220014.300715036, 2990340.0875043753], [4222553.342667134, 2994448.330416521], [4229154.851742587, 2995313.223661183], [4237787.594379719, 2995961.8935946794], [4236518.0734036695, 3003097.2628631433], [4241342.253112655, 3002016.146307315], [4241088.348917446, 2997043.0101505076], [4248705.4747737385, 2995529.4469723487]]]}}, {"type": "Feature", "properties": {"id": "DE71D", "na": "Rheingau-Taunus-Kreis", "AGS": "06439"}, "geometry": {"type": "Polygon", "coordinates": [[[4203510.528026401, 3011097.5253762687], [4201479.294464723, 3005043.2726636333], [4195385.593779689, 3005475.719285964], [4185991.1385569274, 2999637.689884494], [4190307.5098754936, 2992934.7672383618], [4169487.365868293, 2986664.2912145606], [4161616.335816791, 2997259.2334616734], [4166440.515525776, 2999421.4665733287], [4167456.132306615, 3003962.1561078057], [4172534.2162108105, 3001799.92299615], [4173295.9287964394, 3005691.94259713], [4169741.270063503, 3008502.845642282], [4171518.5994299715, 3011962.418620931], [4177866.204310215, 3015205.7682884145], [4180659.150457523, 3013259.758487924], [4182436.479823991, 3015421.9915995803], [4179897.4378718934, 3018232.894644732], [4180913.054652733, 3019530.2345117256], [4187006.755337767, 3019962.6811340568], [4194369.97699885, 3021476.2443122156], [4196655.114755738, 3018449.117955898], [4203764.432221611, 3021476.2443122156], [4206557.378368918, 3019097.7878893944], [4207319.090954548, 3013475.98179909], [4203510.528026401, 3011097.5253762687]]]}}, {"type": "Feature", "properties": {"id": "DE71E", "na": "Wetteraukreis", "AGS": "06440"}, "geometry": {"type": "Polygon", "coordinates": [[[4270287.331366569, 3036395.652782639], [4260385.067753388, 3015421.9915995803], [4249721.091554577, 3014340.875043752], [4240326.636331816, 3019314.0112005603], [4234486.839841992, 3007854.1757087857], [4229662.660133006, 3006556.8358417917], [4228393.139156958, 3008502.845642282], [4230424.372718636, 3010881.3020651033], [4229662.660133006, 3013259.758487924], [4229154.851742587, 3013475.98179909], [4222045.534276714, 3029908.9534476725], [4215444.02520126, 3032936.07980399], [4220014.300715036, 3034665.866293315], [4221791.630081504, 3036395.652782639], [4219760.396519826, 3038341.662583129], [4225092.38461923, 3042233.6821841095], [4242865.678283914, 3035530.759537977], [4253021.846092304, 3043314.798739937], [4255560.888044402, 3043098.5754287713], [4254291.367068353, 3040287.6723836195], [4256068.696434822, 3036611.876093805], [4268510.0020001, 3039206.5558277913], [4270287.331366569, 3036395.652782639]]]}}, {"type": "Feature", "properties": {"id": "DE721", "na": "Gie\u00c3\u0178en, Landkreis", "AGS": "06531"}, "geometry": {"type": "Polygon", "coordinates": [[[4253021.846092304, 3043314.798739937], [4242865.678283914, 3035530.759537977], [4225092.38461923, 3042233.6821841095], [4219760.396519826, 3038341.662583129], [4221791.630081504, 3036395.652782639], [4220014.300715036, 3034665.866293315], [4217729.162958148, 3035098.3129156455], [4216713.546177309, 3040503.895694785], [4225346.28881444, 3045693.255162758], [4218744.779738987, 3048071.7115855794], [4223061.151057553, 3051315.0612530624], [4216205.737786889, 3058666.6538326917], [4220268.204910246, 3066234.4697234863], [4223061.151057553, 3063639.7899894994], [4239818.827941397, 3066666.916345817], [4244643.007650383, 3066450.6930346517], [4248197.666383319, 3063423.566678334], [4247943.76218811, 3059963.9936996847], [4246166.432821641, 3060612.6636331817], [4247943.76218811, 3058017.9838991947], [4259623.355167758, 3049801.4980749036], [4253021.846092304, 3043314.798739937]]]}}, {"type": "Feature", "properties": {"id": "DE722", "na": "Lahn-Dill-Kreis", "AGS": "06532"}, "geometry": {"type": "Polygon", "coordinates": [[[4205287.85739287, 3084613.4511725586], [4208334.707735387, 3077045.635281764], [4212397.174858743, 3075964.5187259363], [4210365.941297065, 3073369.8389919493], [4211889.366468323, 3069045.3727686387], [4214936.21681084, 3070775.159257963], [4220268.204910246, 3066234.4697234863], [4216205.737786889, 3058666.6538326917], [4223061.151057553, 3051315.0612530624], [4218744.779738987, 3048071.7115855794], [4225346.28881444, 3045693.255162758], [4216713.546177309, 3040503.895694785], [4217729.162958148, 3035098.3129156455], [4220014.300715036, 3034665.866293315], [4215444.02520126, 3032936.07980399], [4213158.887444372, 3033368.5264263214], [4212143.270663533, 3034882.08960448], [4197670.7315365765, 3052828.6244312217], [4191069.222461123, 3053261.0710535524], [4190053.605680284, 3055855.7507875394], [4187260.6595329763, 3062342.4501225064], [4188530.180509025, 3065585.7997899894], [4191577.0308515425, 3070991.3825691286], [4188784.084704235, 3076829.4119705986], [4200717.581879094, 3086559.4609730486], [4205287.85739287, 3084613.4511725586]]]}}, {"type": "Feature", "properties": {"id": "DE723", "na": "Limburg-Weilburg", "AGS": "06533"}, "geometry": {"type": "Polygon", "coordinates": [[[4212143.270663533, 3034882.08960448], [4200971.486074303, 3026665.603780189], [4203764.432221611, 3021476.2443122156], [4196655.114755738, 3018449.117955898], [4194369.97699885, 3021476.2443122156], [4187006.755337767, 3019962.6811340568], [4182944.2882144107, 3030990.0700035], [4176850.587529376, 3034665.866293315], [4178627.916895845, 3047639.264963248], [4182182.575628781, 3051315.0612530624], [4187514.5637281863, 3048720.381519076], [4190053.605680284, 3055855.7507875394], [4191069.222461123, 3053261.0710535524], [4197670.7315365765, 3052828.6244312217], [4212143.270663533, 3034882.08960448]]]}}, {"type": "Feature", "properties": {"id": "DE724", "na": "Marburg-Biedenkopf", "AGS": "06534"}, "geometry": {"type": "Polygon", "coordinates": [[[4248959.3789689485, 3092397.4903745186], [4258353.83419171, 3090019.033951698], [4261146.780339017, 3080937.654882744], [4251498.420921046, 3075532.072103605], [4243627.390869543, 3068180.4795239763], [4244643.007650383, 3066450.6930346517], [4239818.827941397, 3066666.916345817], [4223061.151057553, 3063639.7899894994], [4220268.204910246, 3066234.4697234863], [4214936.21681084, 3070775.159257963], [4211889.366468323, 3069045.3727686387], [4210365.941297065, 3073369.8389919493], [4212397.174858743, 3075964.5187259363], [4208334.707735387, 3077045.635281764], [4205287.85739287, 3084613.4511725586], [4214174.504225211, 3096505.7332866644], [4222807.246862343, 3094343.5001750086], [4228900.947547377, 3098451.7430871543], [4248959.3789689485, 3092397.4903745186]]]}}, {"type": "Feature", "properties": {"id": "DE725", "na": "Vogelsbergkreis", "AGS": "06535"}, "geometry": {"type": "Polygon", "coordinates": [[[4281713.020151008, 3076180.7420371016], [4286029.391469574, 3069261.596079804], [4291615.283764188, 3072721.169058453], [4293646.517325866, 3069477.8193909694], [4294154.325716286, 3059963.9936996847], [4295677.750887545, 3057369.3139656982], [4293138.708935447, 3054990.857542877], [4283236.445322266, 3061045.1102555124], [4284252.062103105, 3053477.2943647183], [4280443.499174958, 3040936.3423171155], [4283998.157907896, 3036611.876093805], [4274603.7026851345, 3030557.623381169], [4275619.319465973, 3034233.419670983], [4273841.990099505, 3037909.215960798], [4270541.235561778, 3039206.5558277913], [4270287.331366569, 3036395.652782639], [4268510.0020001, 3039206.5558277913], [4256068.696434822, 3036611.876093805], [4254291.367068353, 3040287.6723836195], [4255560.888044402, 3043098.5754287713], [4253021.846092304, 3043314.798739937], [4259623.355167758, 3049801.4980749036], [4247943.76218811, 3058017.9838991947], [4246166.432821641, 3060612.6636331817], [4247943.76218811, 3059963.9936996847], [4248197.666383319, 3063423.566678334], [4244643.007650383, 3066450.6930346517], [4243627.390869543, 3068180.4795239763], [4251498.420921046, 3075532.072103605], [4261146.780339017, 3080937.654882744], [4263431.918095904, 3080288.9849492474], [4278158.36141807, 3073586.062303115], [4281713.020151008, 3076180.7420371016]]]}}, {"type": "Feature", "properties": {"id": "DE731", "na": "Kassel, Kreisfreie Stadt", "AGS": "06611"}, "geometry": {"type": "Polygon", "coordinates": [[[4290853.571178559, 3136723.269163458], [4290091.858592929, 3131750.13300665], [4285013.774688735, 3128074.336716836], [4277396.648832441, 3130452.793139657], [4276127.127856392, 3134128.5894294716], [4277142.744637232, 3137804.385719286], [4281966.924346217, 3137804.385719286], [4290091.858592929, 3138020.6090304516], [4290853.571178559, 3136723.269163458]]]}}, {"type": "Feature", "properties": {"id": "DE732", "na": "Fulda", "AGS": "06631"}, "geometry": {"type": "Polygon", "coordinates": [[[4315736.182309115, 3072937.3923696186], [4316751.799089954, 3070126.4893244663], [4312689.3319665985, 3062342.4501225064], [4312435.427771389, 3058017.9838991947], [4318275.224261213, 3057585.537276864], [4317513.511675583, 3061477.556877844], [4321068.170408521, 3062774.896744837], [4326400.158507925, 3058450.4305215264], [4323607.212360618, 3055423.3041652082], [4323861.116555828, 3045044.5852292613], [4322337.691384569, 3039422.779138957], [4316497.894894745, 3034233.419670983], [4311165.90679534, 3031638.7399369967], [4304818.301915096, 3034882.08960448], [4302025.355767788, 3027098.05040252], [4289330.1460073, 3030125.176758838], [4283998.157907896, 3036611.876093805], [4280443.499174958, 3040936.3423171155], [4284252.062103105, 3053477.2943647183], [4283236.445322266, 3061045.1102555124], [4293138.708935447, 3054990.857542877], [4295677.750887545, 3057369.3139656982], [4294154.325716286, 3059963.9936996847], [4293646.517325866, 3069477.8193909694], [4297455.080254013, 3067315.586279314], [4305072.206110305, 3076829.4119705986], [4315736.182309115, 3072937.3923696186]]]}}, {"type": "Feature", "properties": {"id": "DE733", "na": "Hersfeld-Rotenburg", "AGS": "06632"}, "geometry": {"type": "Polygon", "coordinates": [[[4322591.595579779, 3098019.296464823], [4325384.5417270865, 3092613.713685684], [4317513.511675583, 3090667.703885194], [4324876.733336667, 3085262.1211060556], [4322591.595579779, 3080072.7616380816], [4317513.511675583, 3078775.4217710886], [4315736.182309115, 3072937.3923696186], [4305072.206110305, 3076829.4119705986], [4297455.080254013, 3067315.586279314], [4293646.517325866, 3069477.8193909694], [4291615.283764188, 3072721.169058453], [4286029.391469574, 3069261.596079804], [4281713.020151008, 3076180.7420371016], [4286283.295664784, 3078775.4217710886], [4287045.0082504125, 3080937.654882744], [4284505.966298315, 3087424.354217711], [4291615.283764188, 3101262.6461323067], [4305326.110305515, 3107965.568778439], [4308626.864843242, 3107965.568778439], [4317767.415870793, 3104073.5491774585], [4322591.595579779, 3098019.296464823]]]}}, {"type": "Feature", "properties": {"id": "DE734", "na": "Kassel, Landkreis", "AGS": "06633"}, "geometry": {"type": "Polygon", "coordinates": [[[4290091.858592929, 3138020.6090304516], [4281966.924346217, 3137804.385719286], [4277142.744637232, 3137804.385719286], [4276127.127856392, 3134128.5894294716], [4277396.648832441, 3130452.793139657], [4285013.774688735, 3128074.336716836], [4290091.858592929, 3131750.13300665], [4290853.571178559, 3136723.269163458], [4300755.8347917395, 3132398.802940147], [4296693.367668383, 3132615.0262513123], [4296185.559277964, 3129804.12320616], [4304310.493524676, 3127858.11340567], [4299232.409620481, 3125912.10360518], [4295169.942497125, 3121371.4140707036], [4295423.846692335, 3119209.1809590477], [4276127.127856392, 3126560.773538677], [4271049.043952198, 3127209.4434721735], [4269779.522976149, 3120938.9674483724], [4264193.630681534, 3117911.8410920547], [4257846.02580129, 3127641.8900945047], [4258353.83419171, 3139750.3955197763], [4263431.918095904, 3140399.0654532723], [4262162.3971198555, 3148399.3279663986], [4277650.553027651, 3164616.0763038155], [4275111.5110755535, 3167426.9793489673], [4282220.828541427, 3171318.9989499478], [4286283.295664784, 3171318.9989499478], [4287806.7208360415, 3168508.0959047955], [4295169.942497125, 3169589.212460623], [4299232.409620481, 3163534.9597479873], [4298216.792839642, 3162021.3965698285], [4295169.942497125, 3163318.7364368215], [4296693.367668383, 3160291.610080504], [4292123.092154607, 3156399.590479524], [4296185.559277964, 3145155.9782989146], [4291615.283764188, 3143426.1918095904], [4290091.858592929, 3138020.6090304516]]]}}, {"type": "Feature", "properties": {"id": "DE735", "na": "Schwalm-Eder-Kreis", "AGS": "06634"}, "geometry": {"type": "Polygon", "coordinates": [[[4295423.846692335, 3119209.1809590477], [4305072.206110305, 3115100.9380469024], [4305326.110305515, 3107965.568778439], [4291615.283764188, 3101262.6461323067], [4284505.966298315, 3087424.354217711], [4287045.0082504125, 3080937.654882744], [4286283.295664784, 3078775.4217710886], [4281713.020151008, 3076180.7420371016], [4278158.36141807, 3073586.062303115], [4263431.918095904, 3080288.9849492474], [4261146.780339017, 3080937.654882744], [4258353.83419171, 3090019.033951698], [4248959.3789689485, 3092397.4903745186], [4253021.846092304, 3092397.4903745186], [4251498.420921046, 3096289.5099754985], [4266478.768438422, 3113154.9282464124], [4264193.630681534, 3117911.8410920547], [4269779.522976149, 3120938.9674483724], [4271049.043952198, 3127209.4434721735], [4276127.127856392, 3126560.773538677], [4295423.846692335, 3119209.1809590477]]]}}, {"type": "Feature", "properties": {"id": "DE736", "na": "Waldeck-Frankenberg", "AGS": "06635"}, "geometry": {"type": "Polygon", "coordinates": [[[4262162.3971198555, 3148399.3279663986], [4263431.918095904, 3140399.0654532723], [4258353.83419171, 3139750.3955197763], [4257846.02580129, 3127641.8900945047], [4264193.630681534, 3117911.8410920547], [4266478.768438422, 3113154.9282464124], [4251498.420921046, 3096289.5099754985], [4253021.846092304, 3092397.4903745186], [4248959.3789689485, 3092397.4903745186], [4228900.947547377, 3098451.7430871543], [4222807.246862343, 3094343.5001750086], [4214174.504225211, 3096505.7332866644], [4218490.875543777, 3101911.316065803], [4215951.833591679, 3108614.2387119355], [4219252.588129407, 3110992.6951347566], [4226869.713985699, 3110127.8018900948], [4234232.935646782, 3119209.1809590477], [4231947.797889894, 3130020.346517326], [4223061.151057553, 3127209.4434721735], [4220268.204910246, 3130669.0164508224], [4229408.755937797, 3139966.6188309416], [4247182.04960248, 3142561.298564928], [4247943.76218811, 3146885.7647882393], [4243881.295064753, 3152940.017500875], [4249467.187359368, 3155534.6972348616], [4253275.750287514, 3156183.3671683585], [4257846.02580129, 3154237.3573678685], [4256830.409020451, 3150777.7843892192], [4257846.02580129, 3148615.551277564], [4262162.3971198555, 3148399.3279663986]]]}}, {"type": "Feature", "properties": {"id": "DE737", "na": "Werra-Mei\u00c3\u0178ner-Kreis", "AGS": "06636"}, "geometry": {"type": "Polygon", "coordinates": [[[4315990.086504325, 3140399.0654532723], [4317513.511675583, 3133912.366118306], [4325638.4459222965, 3124182.3171158554], [4335540.709535477, 3120074.07420371], [4337571.943097155, 3119425.4042702136], [4335794.613730687, 3114884.714735737], [4334017.284364218, 3114452.2681134054], [4329193.104655232, 3114236.04480224], [4330970.434021701, 3105154.6657332866], [4336048.517925896, 3101695.092754638], [4335286.805340267, 3100181.5295764785], [4333763.380169008, 3098667.96639832], [4322591.595579779, 3098019.296464823], [4317767.415870793, 3104073.5491774585], [4308626.864843242, 3107965.568778439], [4305326.110305515, 3107965.568778439], [4305072.206110305, 3115100.9380469024], [4295423.846692335, 3119209.1809590477], [4295169.942497125, 3121371.4140707036], [4299232.409620481, 3125912.10360518], [4304310.493524676, 3127858.11340567], [4296185.559277964, 3129804.12320616], [4296693.367668383, 3132615.0262513123], [4300755.8347917395, 3132398.802940147], [4305326.110305515, 3134993.482674134], [4300248.0264013205, 3139317.9488974446], [4307357.343867193, 3144507.308365418], [4314974.469723486, 3144507.308365418], [4315990.086504325, 3140399.0654532723]]]}}, {"type": "Feature", "properties": {"id": "DE803", "na": "Rostock, Kreisfreie Stadt", "AGS": "13003"}, "geometry": {"type": "Polygon", "coordinates": [[[4451574.926746337, 3453922.866643332], [4453352.256112806, 3454355.313265663], [4457160.819040952, 3455220.2065103254], [4457414.723236162, 3450247.070353518], [4457668.627431371, 3447219.9439971996], [4458684.24421221, 3446571.274063703], [4461223.286164308, 3445490.1575078755], [4461477.190359518, 3445273.9341967097], [4461731.094554728, 3445057.7108855443], [4461223.286164308, 3445490.1575078755], [4458430.340017, 3446787.4973748685], [4457922.531626581, 3451544.410220511], [4458176.435821791, 3451760.6335316766], [4459699.86099305, 3454355.313265663], [4464524.040702035, 3461923.1291564577], [4466809.178458923, 3461706.9058452924], [4470617.741387069, 3456949.99299965], [4465031.849092455, 3455003.98319916], [4463000.615530776, 3448949.7304865243], [4465031.849092455, 3445490.1575078755], [4464524.040702035, 3442463.0311515573], [4456145.202260112, 3441165.6912845643], [4453860.064503225, 3452409.303465173], [4451574.926746337, 3453922.866643332]]]}}, {"type": "Feature", "properties": {"id": "DE804", "na": "Schwerin, Kreisfreie Stadt", "AGS": "13004"}, "geometry": {"type": "Polygon", "coordinates": [[[4416790.052002599, 3397921.0290514524], [4418567.381369068, 3398137.252362618], [4420598.614930746, 3391434.329716486], [4419329.093954697, 3384515.183759188], [4412727.584879244, 3382785.3972698636], [4410696.351317566, 3391650.5530276513], [4407141.692584629, 3394677.679383969], [4415774.435221761, 3398569.698984949], [4416790.052002599, 3397921.0290514524]]]}}, {"type": "Feature", "properties": {"id": "DE80J", "na": "Mecklenburgische Seenplatte", "AGS": "13071"}, "geometry": {"type": "Polygon", "coordinates": [[[4516828.304915246, 3437057.4483724185], [4530793.0356517825, 3429489.632481624], [4532316.46082304, 3427111.1760588028], [4530793.0356517825, 3425381.389569478], [4530539.131456573, 3419110.9135456774], [4533839.8859943, 3415867.563878194], [4542980.437021852, 3420840.7000350016], [4544503.8621931095, 3418894.6902345116], [4541457.011850592, 3414137.7773888693], [4551867.083854193, 3409597.087854393], [4555167.83839192, 3404407.7283864194], [4571671.611080553, 3404191.5050752535], [4565577.91039552, 3400299.4854742736], [4569640.3775188755, 3396191.242562128], [4567863.048152408, 3387974.7567378366], [4564308.389419471, 3384298.960448022], [4567101.335566778, 3380839.3874693736], [4557199.0719535975, 3371541.7850892544], [4555675.646782339, 3362676.6293314667], [4553136.604830241, 3359217.0563528175], [4548312.425121256, 3355541.260063003], [4540949.203460173, 3357487.269863493], [4537394.544727236, 3351865.4637731886], [4531300.844042202, 3353162.803640182], [4520636.867843392, 3343648.9779488975], [4517590.017500875, 3344730.094504725], [4520129.059452972, 3346459.88099405], [4519113.442672133, 3347540.9975498775], [4505656.5203260165, 3345811.211060553], [4498039.394469723, 3352946.5803290163], [4484074.663733186, 3351865.4637731886], [4476457.537876894, 3359217.0563528175], [4477219.250462523, 3360946.842842142], [4472395.070753537, 3365919.9789989498], [4475695.825291265, 3376947.3678683937], [4472902.879143957, 3381271.8340917043], [4473664.591729587, 3386893.640182009], [4476457.537876894, 3389920.7665383266], [4480773.909195459, 3387974.7567378366], [4480773.909195459, 3395975.0192509624], [4484328.567928396, 3401813.048652433], [4486867.609880494, 3397056.1358067906], [4496515.969298465, 3397488.5824291212], [4494230.831541577, 3401380.602030101], [4494484.735736786, 3408083.5246762335], [4502101.86159308, 3416516.2338116905], [4504133.095154758, 3422138.039901995], [4502609.669983499, 3424948.9429471474], [4505148.711935597, 3436625.0017500874], [4508449.466473323, 3433597.8753937697], [4516828.304915246, 3437057.4483724185]]]}}, {"type": "Feature", "properties": {"id": "DE80K", "na": "Landkreis Rostock", "AGS": "13072"}, "geometry": {"type": "Polygon", "coordinates": [[[4505148.711935597, 3436625.0017500874], [4502609.669983499, 3424948.9429471474], [4504133.095154758, 3422138.039901995], [4502101.86159308, 3416516.2338116905], [4494484.735736786, 3408083.5246762335], [4494230.831541577, 3401380.602030101], [4496515.969298465, 3397488.5824291212], [4486867.609880494, 3397056.1358067906], [4484328.567928396, 3401813.048652433], [4480773.909195459, 3395975.0192509624], [4480773.909195459, 3387974.7567378366], [4476457.537876894, 3389920.7665383266], [4473664.591729587, 3386893.640182009], [4467316.9868493425, 3390569.4364718236], [4466301.370068504, 3394893.9026951347], [4458430.340017, 3395542.5726286313], [4451828.830941547, 3405705.068253413], [4439387.525376269, 3408515.971298565], [4439641.429571479, 3413705.330766538], [4436594.579228962, 3414570.2240112005], [4436848.483424171, 3419975.8067903398], [4439133.621181059, 3421921.8165908298], [4439387.525376269, 3430354.525726286], [4432532.112105605, 3428624.739236962], [4423391.561078054, 3436841.2250612527], [4424914.986249313, 3439435.9047952397], [4425930.603030152, 3441381.9145957297], [4427454.02820141, 3443760.371018551], [4423899.369468473, 3442463.0311515573], [4421614.231711585, 3441598.1379068955], [4420852.519125956, 3441381.9145957297], [4421360.327516376, 3441814.361218061], [4424407.177858893, 3444625.264263213], [4430754.782739136, 3450895.7402870143], [4432024.303715186, 3450895.7402870143], [4451574.926746337, 3453922.866643332], [4453860.064503225, 3452409.303465173], [4456145.202260112, 3441165.6912845643], [4464524.040702035, 3442463.0311515573], [4465031.849092455, 3445490.1575078755], [4463000.615530776, 3448949.7304865243], [4465031.849092455, 3455003.98319916], [4470617.741387069, 3456949.99299965], [4466809.178458923, 3461706.9058452924], [4464524.040702035, 3461923.1291564577], [4469856.02880144, 3465598.9254462724], [4469602.12460623, 3463869.1389569477], [4475695.825291265, 3458031.1095554777], [4476965.346267313, 3447868.6139306966], [4505148.711935597, 3436625.0017500874]]]}}, {"type": "Feature", "properties": {"id": "DE80L", "na": "Vorpommern-R\u00c3\u00bcgen", "AGS": "13073"}, "geometry": {"type": "MultiPolygon", "coordinates": [[[[4539933.586679334, 3510140.9275463773], [4539679.682484124, 3505816.461323066], [4542472.628631432, 3502140.6650332515], [4547296.808340417, 3501924.441722086], [4558976.401320066, 3501275.771788589], [4558468.592929646, 3496518.858942947], [4552374.892244613, 3490248.3829191457], [4554913.93419671, 3483977.9068953446], [4556691.2635631785, 3482896.790339517], [4563292.772638632, 3478356.10080504], [4563292.772638632, 3474031.634581729], [4563546.676833842, 3469274.7217360865], [4562023.251662583, 3469923.3916695835], [4561769.347467373, 3470139.614980749], [4561007.634881744, 3470355.8382919147], [4559738.113905695, 3471004.508225411], [4558214.688734436, 3471653.1781589077], [4560245.922296114, 3472950.518025901], [4560499.826491324, 3473166.741337067], [4561769.347467373, 3474031.634581729], [4561261.539076954, 3474896.527826391], [4560499.826491324, 3477274.9842492123], [4560499.826491324, 3477491.207560378], [4558214.688734436, 3477274.9842492123], [4554913.93419671, 3477058.760938047], [4552882.700635032, 3476842.537626881], [4549074.137706885, 3476410.09100455], [4547296.808340417, 3474680.304515226], [4546535.095754787, 3474031.634581729], [4545265.574778739, 3472950.518025901], [4543488.245412271, 3471220.731536577], [4539425.778288914, 3467544.9352467624], [4540187.490874544, 3467112.488624431], [4540695.299264964, 3466680.0420021], [4541457.011850592, 3466247.595379769], [4544249.9579978995, 3464517.8088904447], [4542472.628631432, 3462571.7990899542], [4538917.969898495, 3463652.9156457824], [4537394.544727236, 3464301.585579279], [4527492.281114056, 3467977.3818690935], [4527238.376918846, 3467977.3818690935], [4525968.855942797, 3468409.8284914247], [4525461.047552377, 3468626.05180259], [4524445.430771539, 3471004.508225411], [4524191.526576329, 3472085.624781239], [4523683.718185909, 3473815.4112705635], [4523937.622381119, 3475761.4210710535], [4523937.622381119, 3476410.09100455], [4524191.526576329, 3478139.8774938746], [4526476.664333217, 3478572.324116206], [4532824.26921346, 3479869.6639831993], [4531300.844042202, 3482248.1204060204], [4529269.610480524, 3485059.0234511723], [4525461.047552377, 3484194.1302065104], [4531554.7482374115, 3489599.7129856492], [4532824.26921346, 3490680.829541477], [4530285.227261363, 3493059.285964298], [4529269.610480524, 3493924.1792089604], [4524445.430771539, 3497816.1988099404], [4530793.0356517825, 3499545.985299265], [4532824.26921346, 3509276.034301715], [4529777.418870944, 3505167.7913895696], [4529269.610480524, 3504519.1214560727], [4526730.568528427, 3501491.995099755], [4525461.047552377, 3499762.2086104304], [4526222.760138007, 3501059.548477424], [4529015.706285315, 3506681.3545677285], [4531808.652432621, 3511438.267413371], [4542726.532826642, 3513168.053902695], [4539933.586679334, 3510140.9275463773]], [[4530793.0356517825, 3499545.985299265], [4531554.7482374115, 3499762.2086104304], [4532316.46082304, 3499978.431921596], [4533078.17340867, 3500194.6552327615], [4537394.544727236, 3501491.995099755], [4538917.969898495, 3501924.441722086], [4539171.874093704, 3499762.2086104304], [4539171.874093704, 3498248.6454322715], [4539425.778288914, 3495653.965698285], [4546535.095754787, 3485491.4700735034], [4551867.083854193, 3487221.256562828], [4551105.371268563, 3490897.0528526427], [4548312.425121256, 3491545.722786139], [4548058.520926046, 3491545.722786139], [4546535.095754787, 3499545.985299265], [4542726.532826642, 3500843.325166258], [4540695.299264964, 3501491.995099755], [4539679.682484124, 3503438.004900245], [4538664.065703285, 3506032.6846342315], [4537648.448922446, 3505384.014700735], [4530793.0356517825, 3499545.985299265]]], [[[4537648.448922446, 3459112.2261113054], [4536125.023751188, 3452409.303465173], [4531300.844042202, 3450247.070353518], [4534347.694384719, 3446355.050752538], [4531300.844042202, 3442246.807840392], [4516828.304915246, 3437057.4483724185], [4508449.466473323, 3433597.8753937697], [4505148.711935597, 3436625.0017500874], [4476965.346267313, 3447868.6139306966], [4475695.825291265, 3458031.1095554777], [4469602.12460623, 3463869.1389569477], [4469856.02880144, 3465598.9254462724], [4477219.250462523, 3477058.760938047], [4477473.154657733, 3477058.760938047], [4481789.525976298, 3483761.6835841793], [4484328.567928396, 3488086.1498074904], [4484836.376318816, 3488086.1498074904], [4503879.190959548, 3485059.0234511723], [4510988.508425421, 3483977.9068953446], [4497531.586079304, 3483977.9068953446], [4496008.160908045, 3483977.9068953446], [4495500.352517625, 3483761.6835841793], [4492453.5021751085, 3482464.343717186], [4490676.172808641, 3481815.6737836893], [4479250.484024201, 3477491.207560378], [4477980.963048153, 3475112.751137557], [4476965.346267313, 3473382.9646482323], [4476711.442072104, 3472518.07140357], [4474934.112705635, 3469707.1683584177], [4474426.304315216, 3468626.05180259], [4474934.112705635, 3464734.03220161], [4481281.717585879, 3462788.02240112], [4480520.00500025, 3463652.9156457824], [4477727.058852943, 3466031.3720686035], [4480520.00500025, 3468626.05180259], [4482297.334366718, 3470355.8382919147], [4484582.472123606, 3472518.07140357], [4485851.993099655, 3473815.4112705635], [4488391.035051753, 3476410.09100455], [4493723.023151157, 3478572.324116206], [4495500.352517625, 3479437.217360868], [4496262.065103255, 3479869.6639831993], [4497277.681884094, 3480302.1106055304], [4497785.490274513, 3477274.9842492123], [4503625.286764339, 3475977.644382219], [4506418.232911645, 3475328.9744487223], [4508449.466473323, 3477491.207560378], [4514289.262963148, 3483761.6835841793], [4515558.783939197, 3485059.0234511723], [4515050.975548778, 3485059.0234511723], [4514797.071353568, 3485275.246762338], [4514543.167158358, 3485275.246762338], [4513781.454572729, 3485275.246762338], [4514289.262963148, 3485491.4700735034], [4515050.975548778, 3485707.6933846693], [4519113.442672133, 3486788.809940497], [4517590.017500875, 3485923.9166958346], [4516828.304915246, 3485491.4700735034], [4517336.113305666, 3483761.6835841793], [4519367.346867343, 3479004.770738537], [4523175.909795489, 3469058.498424921], [4523429.813990699, 3467977.3818690935], [4526222.760138007, 3466896.2653132654], [4526730.568528427, 3466680.0420021], [4527746.185309265, 3466463.8186909347], [4530031.323066153, 3465598.9254462724], [4535617.215360768, 3463436.6923346166], [4537648.448922446, 3459112.2261113054]]]]}}, {"type": "Feature", "properties": {"id": "DE80M", "na": "Nordwestmecklenburg", "AGS": "13074"}, "geometry": {"type": "Polygon", "coordinates": [[[4439387.525376269, 3408515.971298565], [4434817.249862493, 3410894.427721386], [4428215.7407870395, 3407218.631431571], [4419582.998149907, 3408083.5246762335], [4419075.189759487, 3399218.368918446], [4416790.052002599, 3397921.0290514524], [4415774.435221761, 3398569.698984949], [4407141.692584629, 3394677.679383969], [4405618.26741337, 3394245.2327616382], [4406633.88419421, 3391218.10640532], [4405364.36321816, 3388407.2033601683], [4397239.428971449, 3384947.630381519], [4384036.410820541, 3393812.7861393066], [4381497.368868443, 3399434.5922296112], [4371849.009450473, 3405056.398319916], [4371341.201060053, 3411759.320966048], [4370325.584279214, 3414354.000700035], [4371595.105255263, 3418678.466923346], [4384544.21921096, 3422786.7098354916], [4379720.039501975, 3424516.4963248163], [4380227.847892394, 3428192.2926146304], [4398508.949947497, 3434895.2152607627], [4399270.662533127, 3433814.098704935], [4400286.279313966, 3431868.088904445], [4402571.4170708535, 3428408.5159257962], [4404348.746437321, 3425813.8361918097], [4414758.818440922, 3423867.8263913197], [4416028.3394169705, 3423651.603080154], [4417805.668783439, 3429273.4091704586], [4418313.477173858, 3430354.525726286], [4419329.093954697, 3432949.2054602727], [4419836.902345117, 3434678.9919495974], [4423391.561078054, 3436841.2250612527], [4432532.112105605, 3428624.739236962], [4439387.525376269, 3430354.525726286], [4439133.621181059, 3421921.8165908298], [4436848.483424171, 3419975.8067903398], [4436594.579228962, 3414570.2240112005], [4439641.429571479, 3413705.330766538], [4439387.525376269, 3408515.971298565]]]}}, {"type": "Feature", "properties": {"id": "DE80N", "na": "Vorpommern-Greifswald", "AGS": "13075"}, "geometry": {"type": "MultiPolygon", "coordinates": [[[[4602647.922896145, 3407218.631431571], [4606456.485824291, 3398569.698984949], [4606202.581629081, 3390353.2131606583], [4611280.665533276, 3380623.164158208], [4614835.324266213, 3366784.872243612], [4608487.7193859685, 3364622.6391319567], [4605440.869043453, 3358568.386419321], [4594269.084454223, 3358135.93979699], [4601886.210310515, 3369163.328666433], [4602901.827091355, 3376514.921246062], [4582843.395669783, 3376298.6979348967], [4572687.227861393, 3388623.4266713336], [4571417.706885344, 3384947.630381519], [4574972.365618281, 3383434.06720336], [4567101.335566778, 3380839.3874693736], [4564308.389419471, 3384298.960448022], [4567863.048152408, 3387974.7567378366], [4569640.3775188755, 3396191.242562128], [4565577.91039552, 3400299.4854742736], [4571671.611080553, 3404191.5050752535], [4555167.83839192, 3404407.7283864194], [4551867.083854193, 3409597.087854393], [4541457.011850592, 3414137.7773888693], [4544503.8621931095, 3418894.6902345116], [4542980.437021852, 3420840.7000350016], [4533839.8859943, 3415867.563878194], [4530539.131456573, 3419110.9135456774], [4530793.0356517825, 3425381.389569478], [4532316.46082304, 3427111.1760588028], [4530793.0356517825, 3429489.632481624], [4516828.304915246, 3437057.4483724185], [4531300.844042202, 3442246.807840392], [4534347.694384719, 3446355.050752538], [4531300.844042202, 3450247.070353518], [4536125.023751188, 3452409.303465173], [4537648.448922446, 3459112.2261113054], [4539425.778288914, 3457814.886244312], [4539171.874093704, 3457382.4396219812], [4538917.969898495, 3457166.2163108154], [4537648.448922446, 3455436.4298214912], [4543488.245412271, 3456301.323066153], [4543742.14960748, 3456085.0997549878], [4543996.05380269, 3455868.876443822], [4549328.041902095, 3447436.1673083655], [4548312.425121256, 3451111.9635981796], [4550851.467073353, 3452409.303465173], [4561261.539076954, 3456949.99299965], [4563038.868443422, 3457814.886244312], [4563800.581029052, 3456949.99299965], [4565831.81459073, 3454355.313265663], [4566085.71878594, 3454139.0899544978], [4568370.856542828, 3451544.410220511], [4568878.664933247, 3451111.9635981796], [4569132.5691284565, 3450895.7402870143], [4569894.2817140855, 3450030.847042352], [4569386.473323666, 3447652.390619531], [4568878.664933247, 3444841.4875743785], [4568624.760738037, 3444409.0409520473], [4566085.71878594, 3442463.0311515573], [4566593.527176359, 3441814.361218061], [4567355.239761988, 3441165.6912845643], [4570148.185909295, 3438571.0115505774], [4573956.748837441, 3434678.9919495974], [4574718.461423071, 3433814.098704935], [4578019.215960798, 3430570.749037452], [4576749.694984749, 3429489.632481624], [4574464.557227861, 3427327.399369968], [4572433.323666183, 3425597.612880644], [4571417.706885344, 3423002.9331466574], [4572179.419470973, 3421489.369968498], [4575987.98239912, 3419543.360168008], [4588683.192159608, 3412840.437521876], [4591476.138306916, 3411326.8743437175], [4598839.359967998, 3412840.437521876], [4601632.306115305, 3413489.107455373], [4601886.210310515, 3413272.8841442075], [4602647.922896145, 3411543.097654883], [4602394.018700935, 3411326.8743437175], [4599854.976748837, 3408515.971298565], [4599093.264163208, 3407651.078053903], [4602647.922896145, 3407218.631431571]]], [[[4598585.455772789, 3432732.9821491074], [4598077.647382369, 3425813.8361918097], [4584366.820841042, 3423867.8263913197], [4581066.066303315, 3423651.603080154], [4578780.928546427, 3423219.156457823], [4573956.748837441, 3422570.4865243263], [4572687.227861393, 3422570.4865243263], [4575987.98239912, 3425813.8361918097], [4579796.545327267, 3429489.632481624], [4576749.694984749, 3435327.6618830943], [4577511.407570379, 3438571.0115505774], [4581319.970498525, 3436192.5551277567], [4582843.395669783, 3435327.6618830943], [4584112.916645832, 3434462.768638432], [4586144.15020751, 3433381.6520826044], [4586144.15020751, 3434030.3220161004], [4586144.15020751, 3435760.108505425], [4586398.05440272, 3440084.574728736], [4584112.916645832, 3441598.1379068955], [4583351.204060202, 3442246.807840392], [4577257.503375169, 3446138.827441372], [4577003.599179959, 3446571.274063703], [4577003.599179959, 3445273.9341967097], [4577257.503375169, 3444625.264263213], [4577511.407570379, 3442895.4777738885], [4577511.407570379, 3442030.584529226], [4576749.694984749, 3441381.9145957297], [4575734.07820391, 3440517.0213510673], [4574210.653032651, 3439219.6814840743], [4574972.365618281, 3443327.9243962197], [4574972.365618281, 3443760.371018551], [4570655.994299715, 3442679.254462723], [4569132.5691284565, 3444625.264263213], [4569640.3775188755, 3446571.274063703], [4569894.2817140855, 3447652.390619531], [4570402.090104505, 3450247.070353518], [4569386.473323666, 3451328.1869093454], [4566085.71878594, 3455652.6531326566], [4569894.2817140855, 3458031.1095554777], [4572941.132056603, 3451760.6335316766], [4581066.066303315, 3447436.1673083655], [4592491.755087754, 3437706.118305915], [4598585.455772789, 3432732.9821491074]]]]}}, {"type": "Feature", "properties": {"id": "DEA1F", "na": "Wesel", "AGS": "05170"}, "geometry": {"type": "Polygon", "coordinates": [[[4107788.6464323215, 3186238.4074203707], [4109565.97579879, 3182778.8344417224], [4106773.0296514826, 3178454.3682184108], [4106519.1254562726, 3173913.678683934], [4101441.0415520775, 3168075.649282464], [4097886.382819141, 3162886.289814491], [4092808.2989149457, 3165264.7462373115], [4090777.065353268, 3164832.299614981], [4091792.6821341068, 3161588.9499474973], [4086968.502425121, 3160075.3867693385], [4090269.256962848, 3154237.3573678685], [4089253.640182009, 3149696.6678333916], [4086968.502425121, 3147750.6580329016], [4080113.0891544577, 3149264.2212110604], [4080113.0891544577, 3149696.6678333916], [4079351.3765688282, 3151642.6776338816], [4078843.568178409, 3151858.900945047], [4074527.196859843, 3163534.9597479873], [4076812.334616731, 3162670.066503325], [4078335.7597879893, 3167643.202660133], [4070210.825541277, 3169156.765838292], [4066656.16680834, 3175859.6884844243], [4073257.675883794, 3187319.523976199], [4073003.7716885842, 3184508.6209310465], [4076304.526226311, 3182778.8344417224], [4078589.663983199, 3184724.8442422124], [4079859.1849592477, 3191860.2135106754], [4079097.4723736187, 3194887.339866993], [4081382.6101305066, 3194671.1165558277], [4097124.6702335114, 3190130.4270213507], [4101948.849942497, 3184724.8442422124], [4107788.6464323215, 3186238.4074203707]]]}}, {"type": "Feature", "properties": {"id": "DEA22", "na": "Bonn, Kreisfreie Stadt", "AGS": "05314"}, "geometry": {"type": "Polygon", "coordinates": [[[4123784.6107305363, 3063423.566678334], [4122768.9939496974, 3062774.896744837], [4110835.4967748383, 3064720.906545327], [4111851.1135556777, 3075748.295414771], [4119214.3352167606, 3077045.635281764], [4124038.5149257462, 3073153.615680784], [4120991.664583229, 3069694.042702135], [4123784.6107305363, 3063423.566678334]]]}}, {"type": "Feature", "properties": {"id": "DEA23", "na": "K\u00c3\u00b6ln, Kreisfreie Stadt", "AGS": "05315"}, "geometry": {"type": "Polygon", "coordinates": [[[4103726.1793089653, 3110560.2485124255], [4108804.2632131604, 3104289.7724886243], [4115405.7722886144, 3104938.442422121], [4116421.3890694533, 3098235.5197759885], [4119722.1436071806, 3094559.7234861744], [4121245.5687784385, 3087856.800840042], [4116167.484874244, 3084181.0045502274], [4108296.454822741, 3085478.344417221], [4104995.700285014, 3085262.1211060556], [4104233.987699385, 3091316.373818691], [4097632.4786239313, 3095640.840042002], [4097124.6702335114, 3097803.073153658], [4099663.712185609, 3102343.7626881343], [4099409.807990399, 3106235.7822891143], [4094839.5324766235, 3110992.6951347566], [4097632.4786239313, 3108830.462023101], [4100679.328966448, 3112938.7049352466], [4100679.328966448, 3112290.03500175], [4103726.1793089653, 3110560.2485124255]]]}}, {"type": "Feature", "properties": {"id": "DEA24", "na": "Leverkusen, Kreisfreie Stadt", "AGS": "05316"}, "geometry": {"type": "Polygon", "coordinates": [[[4115405.7722886144, 3104938.442422121], [4108804.2632131604, 3104289.7724886243], [4103726.1793089653, 3110560.2485124255], [4110327.6883844193, 3113371.151557578], [4115913.580679034, 3112722.4816240813], [4114897.963898195, 3111425.141757088], [4118960.4310215507, 3109695.355267763], [4115405.7722886144, 3104938.442422121]]]}}, {"type": "Feature", "properties": {"id": "DEA26", "na": "D\u00c3\u00bcren", "AGS": "05358"}, "geometry": {"type": "Polygon", "coordinates": [[[4074273.292664633, 3108398.01540077], [4072495.963298165, 3105154.6657332866], [4076304.526226311, 3093046.1603080155], [4083159.9394969745, 3084397.2278613932], [4088999.735986799, 3085694.5677283863], [4089253.640182009, 3080288.9849492474], [4086714.598229911, 3078991.645082254], [4087730.21501075, 3076613.188659433], [4086460.6940347017, 3072288.7224361217], [4080113.0891544577, 3071856.275813791], [4077320.14300715, 3061261.333566678], [4067417.8793939697, 3061477.556877844], [4065386.645832292, 3061261.333566678], [4064878.837441872, 3068180.4795239763], [4061831.987099355, 3066450.6930346517], [4058531.2325616283, 3069477.8193909694], [4064117.124856243, 3078559.1984599233], [4062085.8912945646, 3090667.703885194], [4055738.2864143206, 3090451.4805740286], [4053707.0528526427, 3094343.5001750086], [4055992.1906095305, 3098235.5197759885], [4053707.0528526427, 3100181.5295764785], [4060308.561928096, 3106452.00560028], [4072749.8674933743, 3109479.131956598], [4074273.292664633, 3108398.01540077]]]}}, {"type": "Feature", "properties": {"id": "DEA27", "na": "Rhein-Erft-Kreis", "AGS": "05362"}, "geometry": {"type": "Polygon", "coordinates": [[[4108296.454822741, 3085478.344417221], [4111597.209360468, 3080721.4315715786], [4099917.616380819, 3079640.315015751], [4093316.107305365, 3072504.945747287], [4087730.21501075, 3076613.188659433], [4086714.598229911, 3078991.645082254], [4089253.640182009, 3080288.9849492474], [4088999.735986799, 3085694.5677283863], [4083159.9394969745, 3084397.2278613932], [4076304.526226311, 3093046.1603080155], [4072495.963298165, 3105154.6657332866], [4074273.292664633, 3108398.01540077], [4078081.85559278, 3110992.6951347566], [4081128.7059352966, 3106452.00560028], [4090523.161158058, 3105587.112355618], [4094839.5324766235, 3110992.6951347566], [4099409.807990399, 3106235.7822891143], [4099663.712185609, 3102343.7626881343], [4097124.6702335114, 3097803.073153658], [4097632.4786239313, 3095640.840042002], [4104233.987699385, 3091316.373818691], [4104995.700285014, 3085262.1211060556], [4108296.454822741, 3085478.344417221]]]}}, {"type": "Feature", "properties": {"id": "DEA28", "na": "Euskirchen", "AGS": "05366"}, "geometry": {"type": "Polygon", "coordinates": [[[4103472.275113756, 3054125.9642982148], [4101187.137356868, 3044395.915295765], [4091030.9695484773, 3045477.0318515925], [4089761.4485724284, 3041152.5656282813], [4093316.107305365, 3032719.856492825], [4085952.885644282, 3030125.176758838], [4079605.280764038, 3036179.429471473], [4066402.2626131307, 3034665.866293315], [4064117.124856243, 3036611.876093805], [4066402.2626131307, 3029692.7301365067], [4065132.741637082, 3029692.7301365067], [4060816.370318516, 3036179.429471473], [4063609.316465823, 3044179.6919845995], [4059800.7535376768, 3049369.0514525725], [4063609.316465823, 3051531.2845642283], [4067417.8793939697, 3061477.556877844], [4077320.14300715, 3061261.333566678], [4080113.0891544577, 3071856.275813791], [4086460.6940347017, 3072288.7224361217], [4087730.21501075, 3076613.188659433], [4093316.107305365, 3072504.945747287], [4099917.616380819, 3079640.315015751], [4103218.370918546, 3073802.285614281], [4098901.99959998, 3069694.042702135], [4098901.99959998, 3064937.129856493], [4102710.5625281264, 3062126.2268113405], [4103472.275113756, 3054125.9642982148]]]}}, {"type": "Feature", "properties": {"id": "DEA29", "na": "Heinsberg", "AGS": "05370"}, "geometry": {"type": "Polygon", "coordinates": [[[4061831.987099355, 3124830.9870493524], [4066148.358417921, 3115749.607980399], [4071988.1549077453, 3114884.714735737], [4072749.8674933743, 3109479.131956598], [4060308.561928096, 3106452.00560028], [4053707.0528526427, 3100181.5295764785], [4049644.585729286, 3094775.9467973397], [4045836.02280114, 3096505.7332866644], [4041265.747287364, 3099100.413020651], [4040504.034701735, 3101695.092754638], [4042027.4598729936, 3104505.99579979], [4032886.9088454423, 3104073.5491774585], [4031871.2920646034, 3110560.2485124255], [4031363.4836741835, 3112722.4816240813], [4034664.2382119102, 3114236.04480224], [4037457.184359218, 3110560.2485124255], [4040504.034701735, 3115533.384669233], [4053453.1486574328, 3123317.4238711935], [4051168.010900545, 3125263.4336716835], [4053707.0528526427, 3126344.5502275117], [4061831.987099355, 3124830.9870493524]]]}}, {"type": "Feature", "properties": {"id": "DEA2A", "na": "Oberbergischer Kreis", "AGS": "05374"}, "geometry": {"type": "Polygon", "coordinates": [[[4141811.8085904294, 3125695.8802940147], [4141050.0960048, 3122668.753937697], [4145874.2757137856, 3113587.374868743], [4160854.6232311614, 3109262.9086454324], [4159839.0064503225, 3108181.792089605], [4161362.4316215813, 3101046.422821141], [4165170.994549727, 3098884.1897094855], [4165424.898744937, 3094343.5001750086], [4162631.9525976297, 3086343.2376618832], [4156284.3477173857, 3081370.101505075], [4146889.8924946245, 3084181.0045502274], [4141050.0960048, 3095857.063353168], [4138257.149857493, 3096505.7332866644], [4130132.2156107808, 3102776.2093104655], [4133940.7785389265, 3109046.6853342666], [4129878.311415571, 3118560.5110255512], [4131909.5449772486, 3118992.9576478824], [4132163.4491724586, 3125047.2103605177], [4132925.1617580876, 3128723.0066503324], [4135210.2995149754, 3129587.8998949947], [4141811.8085904294, 3125695.8802940147]]]}}, {"type": "Feature", "properties": {"id": "DEA2B", "na": "Rheinisch-Bergischer Kreis", "AGS": "05378"}, "geometry": {"type": "Polygon", "coordinates": [[[4129878.311415571, 3118560.5110255512], [4133940.7785389265, 3109046.6853342666], [4130132.2156107808, 3102776.2093104655], [4138257.149857493, 3096505.7332866644], [4134448.5869293464, 3092397.4903745186], [4127593.173658683, 3094343.5001750086], [4121245.5687784385, 3087856.800840042], [4119722.1436071806, 3094559.7234861744], [4116421.3890694533, 3098235.5197759885], [4115405.7722886144, 3104938.442422121], [4118960.4310215507, 3109695.355267763], [4114897.963898195, 3111425.141757088], [4115913.580679034, 3112722.4816240813], [4110327.6883844193, 3113371.151557578], [4110835.4967748383, 3116182.05460273], [4121499.4729736485, 3115749.607980399], [4123276.802340117, 3116830.724536227], [4122768.9939496974, 3119641.627581379], [4128862.694634732, 3119857.8508925447], [4129878.311415571, 3118560.5110255512]]]}}, {"type": "Feature", "properties": {"id": "DEA2C", "na": "Rhein-Sieg-Kreis", "AGS": "05382"}, "geometry": {"type": "Polygon", "coordinates": [[[4156284.3477173857, 3081370.101505075], [4157046.060303015, 3076829.4119705986], [4140288.383419171, 3069694.042702135], [4135464.2037101854, 3070775.159257963], [4134194.6827341365, 3063207.343367168], [4123784.6107305363, 3060612.6636331817], [4123784.6107305363, 3063423.566678334], [4120991.664583229, 3069694.042702135], [4124038.5149257462, 3073153.615680784], [4119214.3352167606, 3077045.635281764], [4111851.1135556777, 3075748.295414771], [4110835.4967748383, 3064720.906545327], [4122768.9939496974, 3062774.896744837], [4119214.3352167606, 3058234.2072103606], [4112612.826141307, 3059099.1004550224], [4103472.275113756, 3054125.9642982148], [4102710.5625281264, 3062126.2268113405], [4098901.99959998, 3064937.129856493], [4098901.99959998, 3069694.042702135], [4103218.370918546, 3073802.285614281], [4099917.616380819, 3079640.315015751], [4111597.209360468, 3080721.4315715786], [4108296.454822741, 3085478.344417221], [4116167.484874244, 3084181.0045502274], [4121245.5687784385, 3087856.800840042], [4127593.173658683, 3094343.5001750086], [4134448.5869293464, 3092397.4903745186], [4138257.149857493, 3096505.7332866644], [4141050.0960048, 3095857.063353168], [4146889.8924946245, 3084181.0045502274], [4156284.3477173857, 3081370.101505075]]]}}, {"type": "Feature", "properties": {"id": "DEA2D", "na": "St\u00c3\u00a4dteregion Aachen", "AGS": "05334"}, "geometry": {"type": "Polygon", "coordinates": [[[4067417.8793939697, 3061477.556877844], [4063609.316465823, 3051531.2845642283], [4059800.7535376768, 3049369.0514525725], [4053453.1486574328, 3049369.0514525725], [4052183.627681384, 3052396.17780889], [4051168.010900545, 3052396.17780889], [4051168.010900545, 3057585.537276864], [4057007.8073903695, 3063856.0133006647], [4051168.010900545, 3064937.129856493], [4046851.6395819793, 3075099.625481274], [4041265.747287364, 3075099.625481274], [4040250.1305065253, 3078991.645082254], [4039488.417920896, 3084397.2278613932], [4040757.9388969447, 3088937.9173958697], [4045836.02280114, 3096505.7332866644], [4049644.585729286, 3094775.9467973397], [4053707.0528526427, 3100181.5295764785], [4055992.1906095305, 3098235.5197759885], [4053707.0528526427, 3094343.5001750086], [4055738.2864143206, 3090451.4805740286], [4062085.8912945646, 3090667.703885194], [4064117.124856243, 3078559.1984599233], [4058531.2325616283, 3069477.8193909694], [4061831.987099355, 3066450.6930346517], [4064878.837441872, 3068180.4795239763], [4065386.645832292, 3061261.333566678], [4067417.8793939697, 3061477.556877844]]]}}, {"type": "Feature", "properties": {"id": "DEA31", "na": "Bottrop, Kreisfreie Stadt", "AGS": "05512"}, "geometry": {"type": "Polygon", "coordinates": [[[4112866.7303365166, 3162453.8431921597], [4107788.6464323215, 3158561.823591179], [4103218.370918546, 3166562.0861043055], [4101441.0415520775, 3168075.649282464], [4106519.1254562726, 3173913.678683934], [4109819.8799939994, 3173697.4553727685], [4111851.1135556777, 3170454.1057052854], [4107534.7422371116, 3165913.4161708085], [4112866.7303365166, 3162453.8431921597]]]}}, {"type": "Feature", "properties": {"id": "DEA32", "na": "Gelsenkirchen, Kreisfreie Stadt", "AGS": "05513"}, "geometry": {"type": "Polygon", "coordinates": [[[4123022.8981449073, 3163967.4063703185], [4122515.0897544874, 3158994.270213511], [4119976.04780239, 3156183.3671683585], [4113628.442922146, 3162237.619880994], [4114136.2513125655, 3167859.4259712985], [4112358.921946097, 3172400.1155057754], [4115659.676483824, 3172400.1155057754], [4123022.8981449073, 3163967.4063703185]]]}}, {"type": "Feature", "properties": {"id": "DEA33", "na": "M\u00c3\u00bcnster, Kreisfreie Stadt", "AGS": "05515"}, "geometry": {"type": "Polygon", "coordinates": [[[4163393.665183259, 3216293.447672384], [4167963.940697035, 3203536.2723136153], [4161870.2400120003, 3201590.2625131253], [4156538.2519125957, 3194887.339866993], [4147397.7008850444, 3206347.1753587676], [4150698.455422771, 3210455.4182709134], [4150190.6470323512, 3212833.8746937346], [4157553.8686934346, 3218671.9040952045], [4163393.665183259, 3216293.447672384]]]}}, {"type": "Feature", "properties": {"id": "DEA34", "na": "Borken", "AGS": "05554"}, "geometry": {"type": "Polygon", "coordinates": [[[4133686.874343717, 3219969.243962198], [4123530.706535327, 3215428.5544277215], [4118452.6226311317, 3201590.2625131253], [4126069.748487424, 3194022.446622331], [4119214.3352167606, 3189265.533776689], [4112866.7303365166, 3192076.4368218407], [4108296.454822741, 3189697.98039902], [4107788.6464323215, 3186238.4074203707], [4101948.849942497, 3184724.8442422124], [4097124.6702335114, 3190130.4270213507], [4081382.6101305066, 3194671.1165558277], [4079097.4723736187, 3194887.339866993], [4073511.580079004, 3197049.572978649], [4072495.963298165, 3202022.709135457], [4078081.85559278, 3199644.2527126353], [4093062.2031101556, 3205914.728736437], [4095347.3408670435, 3203536.2723136153], [4103218.370918546, 3210671.641582079], [4103218.370918546, 3214131.214560728], [4095601.245062253, 3219536.797339867], [4099155.9037951897, 3228185.729786489], [4105757.4128706437, 3227969.506475324], [4115405.7722886144, 3239429.3419670984], [4120737.7603880195, 3240942.9051452572], [4123022.8981449073, 3240942.9051452572], [4122768.9939496974, 3240510.458522926], [4122515.0897544874, 3236402.2156107808], [4126069.748487424, 3229050.6230311515], [4132671.257562878, 3226888.389919496], [4133686.874343717, 3219969.243962198]]]}}, {"type": "Feature", "properties": {"id": "DEA35", "na": "Coesfeld", "AGS": "05558"}, "geometry": {"type": "Polygon", "coordinates": [[[4150190.6470323512, 3212833.8746937346], [4150698.455422771, 3210455.4182709134], [4147397.7008850444, 3206347.1753587676], [4156538.2519125957, 3194887.339866993], [4160600.7190359514, 3192292.6601330065], [4164663.186159308, 3183211.281064053], [4162124.1442072103, 3180400.3780189008], [4151206.2638131906, 3177805.6982849143], [4147143.7966898344, 3182778.8344417224], [4143081.3295664783, 3181481.4945747284], [4144604.7547377367, 3177589.4749737484], [4141811.8085904294, 3175859.6884844243], [4134448.5869293464, 3180616.6013300666], [4131909.5449772486, 3191211.543577179], [4128862.694634732, 3193373.7766888347], [4126069.748487424, 3194022.446622331], [4118452.6226311317, 3201590.2625131253], [4123530.706535327, 3215428.5544277215], [4133686.874343717, 3219969.243962198], [4135210.2995149754, 3219969.243962198], [4150190.6470323512, 3212833.8746937346]]]}}, {"type": "Feature", "properties": {"id": "DEA36", "na": "Recklinghausen", "AGS": "05562"}, "geometry": {"type": "Polygon", "coordinates": [[[4141811.8085904294, 3175859.6884844243], [4145620.3715185756, 3171967.668883444], [4142065.712785639, 3168508.0959047955], [4136479.8204910243, 3166345.8627931396], [4138003.245662283, 3160724.056702835], [4134702.4911245564, 3160291.610080504], [4133179.0659532975, 3161372.7266363315], [4130386.1198059903, 3165264.7462373115], [4123022.8981449073, 3163967.4063703185], [4115659.676483824, 3172400.1155057754], [4112358.921946097, 3172400.1155057754], [4114136.2513125655, 3167859.4259712985], [4113628.442922146, 3162237.619880994], [4112866.7303365166, 3162453.8431921597], [4107534.7422371116, 3165913.4161708085], [4111851.1135556777, 3170454.1057052854], [4109819.8799939994, 3173697.4553727685], [4106519.1254562726, 3173913.678683934], [4106773.0296514826, 3178454.3682184108], [4109565.97579879, 3182778.8344417224], [4107788.6464323215, 3186238.4074203707], [4108296.454822741, 3189697.98039902], [4112866.7303365166, 3192076.4368218407], [4119214.3352167606, 3189265.533776689], [4126069.748487424, 3194022.446622331], [4128862.694634732, 3193373.7766888347], [4131909.5449772486, 3191211.543577179], [4134448.5869293464, 3180616.6013300666], [4141811.8085904294, 3175859.6884844243]]]}}, {"type": "Feature", "properties": {"id": "DEA37", "na": "Steinfurt", "AGS": "05566"}, "geometry": {"type": "Polygon", "coordinates": [[[4182182.575628781, 3248078.2744137207], [4183959.9049952496, 3246348.487924396], [4179897.4378718934, 3245483.5946797337], [4181420.863043152, 3242240.2450122507], [4179389.629481474, 3241159.128456423], [4177612.3001150056, 3234239.982499125], [4185229.4259712985, 3230996.6328316415], [4184467.7133856695, 3224726.1568078403], [4176088.874943747, 3221266.5838291915], [4171264.6952347616, 3222780.1470073503], [4167202.2281114054, 3223212.5936296815], [4163393.665183259, 3216293.447672384], [4157553.8686934346, 3218671.9040952045], [4150190.6470323512, 3212833.8746937346], [4135210.2995149754, 3219969.243962198], [4133686.874343717, 3219969.243962198], [4132671.257562878, 3226888.389919496], [4126069.748487424, 3229050.6230311515], [4122515.0897544874, 3236402.2156107808], [4122768.9939496974, 3240510.458522926], [4123022.8981449073, 3240942.9051452572], [4138003.245662283, 3244618.7014350714], [4155014.826741337, 3253916.3038151907], [4158061.677083854, 3259538.1099054953], [4155776.5393269663, 3260835.4497724883], [4158569.4854742736, 3265376.1393069653], [4163647.569378469, 3263213.90619531], [4165424.898744937, 3257159.653482674], [4177358.395919796, 3254348.750437522], [4182182.575628781, 3248078.2744137207]]]}}, {"type": "Feature", "properties": {"id": "DEA38", "na": "Warendorf", "AGS": "05570"}, "geometry": {"type": "Polygon", "coordinates": [[[4176088.874943747, 3221266.5838291915], [4182436.479823991, 3215861.0010500522], [4185991.1385569274, 3219320.5740287015], [4190561.414070703, 3218023.234161708], [4188784.084704235, 3213050.0980049], [4205033.95319766, 3180832.824641232], [4199955.869293464, 3173697.4553727685], [4196147.306365319, 3173913.678683934], [4197416.827341367, 3177805.6982849143], [4192084.839241962, 3179967.93139657], [4178881.8210910545, 3178670.591529576], [4171518.5994299715, 3182130.1645082254], [4164663.186159308, 3183211.281064053], [4160600.7190359514, 3192292.6601330065], [4156538.2519125957, 3194887.339866993], [4161870.2400120003, 3201590.2625131253], [4167963.940697035, 3203536.2723136153], [4163393.665183259, 3216293.447672384], [4167202.2281114054, 3223212.5936296815], [4171264.6952347616, 3222780.1470073503], [4176088.874943747, 3221266.5838291915]]]}}, {"type": "Feature", "properties": {"id": "DEA41", "na": "Bielefeld, Kreisfreie Stadt", "AGS": "05711"}, "geometry": {"type": "Polygon", "coordinates": [[[4228647.043352168, 3217590.787539377], [4228139.234961748, 3206347.1753587676], [4225092.38461923, 3202887.6023801193], [4218744.779738987, 3202022.709135457], [4209604.228711436, 3208293.1851592576], [4214682.312615631, 3209806.748337417], [4214428.408420421, 3218239.457472874], [4216205.737786889, 3222347.700385019], [4222045.534276714, 3222347.700385019], [4228647.043352168, 3217590.787539377]]]}}, {"type": "Feature", "properties": {"id": "DEA42", "na": "G\u00c3\u00bctersloh", "AGS": "05754"}, "geometry": {"type": "Polygon", "coordinates": [[[4212143.270663533, 3224077.486874344], [4216205.737786889, 3222347.700385019], [4214428.408420421, 3218239.457472874], [4214682.312615631, 3209806.748337417], [4209604.228711436, 3208293.1851592576], [4218744.779738987, 3202022.709135457], [4225092.38461923, 3202887.6023801193], [4230424.372718636, 3201374.03920196], [4234740.744037202, 3195103.563178159], [4228139.234961748, 3195968.456422821], [4220014.300715036, 3192292.6601330065], [4211635.462273113, 3184508.6209310465], [4210619.8454922745, 3179967.93139657], [4208080.803540177, 3179967.93139657], [4205033.95319766, 3180832.824641232], [4188784.084704235, 3213050.0980049], [4190561.414070703, 3218023.234161708], [4203510.528026401, 3225374.826741337], [4212143.270663533, 3224077.486874344]]]}}, {"type": "Feature", "properties": {"id": "DEA43", "na": "Herford", "AGS": "05758"}, "geometry": {"type": "Polygon", "coordinates": [[[4247689.8579929, 3230996.6328316415], [4245150.816040802, 3222996.370318516], [4235502.4566228315, 3224293.710185509], [4228647.043352168, 3217590.787539377], [4222045.534276714, 3222347.700385019], [4216205.737786889, 3222347.700385019], [4212143.270663533, 3224077.486874344], [4219506.492324616, 3231645.3027651384], [4214428.408420421, 3234888.6524326215], [4216205.737786889, 3240942.9051452572], [4216713.546177309, 3240078.011900595], [4232963.414670734, 3238564.448722436], [4237787.594379719, 3233807.535876794], [4237533.690184509, 3228834.399719986], [4247689.8579929, 3230996.6328316415]]]}}, {"type": "Feature", "properties": {"id": "DEB17", "na": "Mayen-Koblenz", "AGS": "07137"}, "geometry": {"type": "Polygon", "coordinates": [[[4150444.551227561, 3042017.4588729437], [4155522.635131757, 3036828.09940497], [4153491.4015700785, 3033800.9730486525], [4154760.922546127, 3032503.633181659], [4150698.455422771, 3033800.9730486525], [4148413.3176658833, 3035963.206160308], [4142065.712785639, 3030990.0700035], [4144858.6589329466, 3022557.3608680433], [4150444.551227561, 3022989.8074903744], [4153491.4015700785, 3019097.7878893944], [4152475.784789239, 3017584.2247112356], [4148159.4134706734, 3018665.3412670633], [4144350.8505425267, 3019314.0112005603], [4133940.7785389265, 3008719.0689534475], [4127593.173658683, 3017800.448022401], [4120483.8561928095, 3022341.137556878], [4112105.017750887, 3022773.5841792086], [4108550.3590179505, 3024503.3706685333], [4108296.454822741, 3029692.7301365067], [4106519.1254562726, 3030773.846692335], [4113628.442922146, 3036179.429471473], [4124800.227511375, 3036179.429471473], [4132671.257562878, 3043963.4686734336], [4133179.0659532975, 3042666.12880644], [4141811.8085904294, 3036395.652782639], [4146889.8924946245, 3037044.3227161355], [4150444.551227561, 3042017.4588729437]]]}}, {"type": "Feature", "properties": {"id": "DEB18", "na": "Neuwied", "AGS": "07138"}, "geometry": {"type": "Polygon", "coordinates": [[[4140288.383419171, 3069694.042702135], [4142065.712785639, 3065369.576478824], [4140542.287614381, 3059315.323766188], [4143335.2337616878, 3054342.18760938], [4146128.1799089955, 3053261.0710535524], [4150698.455422771, 3062774.896744837], [4158315.5812790636, 3059315.323766188], [4155776.5393269663, 3056288.19740987], [4158315.5812790636, 3052612.401120056], [4156284.3477173857, 3045260.808540427], [4150444.551227561, 3042017.4588729437], [4146889.8924946245, 3037044.3227161355], [4141811.8085904294, 3036395.652782639], [4133179.0659532975, 3042666.12880644], [4132671.257562878, 3043963.4686734336], [4127339.269463473, 3054990.857542877], [4123530.706535327, 3057153.0906545324], [4123784.6107305363, 3060612.6636331817], [4134194.6827341365, 3063207.343367168], [4135464.2037101854, 3070775.159257963], [4140288.383419171, 3069694.042702135]]]}}, {"type": "Feature", "properties": {"id": "DEB19", "na": "Rhein-Hunsr\u00c3\u00bcck-Kreis", "AGS": "07140"}, "geometry": {"type": "Polygon", "coordinates": [[[4152475.784789239, 3017584.2247112356], [4148159.4134706734, 3017151.7780889045], [4158315.5812790636, 3006556.8358417917], [4159331.198059903, 3004827.0493524675], [4158061.677083854, 3002664.8162408117], [4161108.5274263714, 2999205.2432621634], [4153745.305765288, 2993799.660483024], [4158569.4854742736, 2989907.640882044], [4155268.730936547, 2990340.0875043753], [4152983.593179659, 2984934.5047252364], [4141050.0960048, 2975204.455722786], [4133940.7785389265, 2974772.009100455], [4133686.874343717, 2978880.2520126007], [4121499.4729736485, 2978447.8053902695], [4120737.7603880195, 2980177.591879594], [4124038.5149257462, 2984718.2814140706], [4120229.9519975996, 2987529.184459223], [4131401.736586829, 2992286.0973048653], [4129624.407220361, 2997907.9033951694], [4133940.7785389265, 3008719.0689534475], [4144350.8505425267, 3019314.0112005603], [4148159.4134706734, 3018665.3412670633], [4152475.784789239, 3017584.2247112356]]]}}, {"type": "Feature", "properties": {"id": "DEB1A", "na": "Rhein-Lahn-Kreis", "AGS": "07141"}, "geometry": {"type": "Polygon", "coordinates": [[[4176850.587529376, 3034665.866293315], [4182944.2882144107, 3030990.0700035], [4187006.755337767, 3019962.6811340568], [4180913.054652733, 3019530.2345117256], [4179897.4378718934, 3018232.894644732], [4182436.479823991, 3015421.9915995803], [4180659.150457523, 3013259.758487924], [4177866.204310215, 3015205.7682884145], [4171518.5994299715, 3011962.418620931], [4169741.270063503, 3008502.845642282], [4173295.9287964394, 3005691.94259713], [4172534.2162108105, 3001799.92299615], [4167456.132306615, 3003962.1561078057], [4166440.515525776, 2999421.4665733287], [4161616.335816791, 2997259.2334616734], [4161108.5274263714, 2999205.2432621634], [4158061.677083854, 3002664.8162408117], [4159331.198059903, 3004827.0493524675], [4158315.5812790636, 3006556.8358417917], [4148159.4134706734, 3017151.7780889045], [4152475.784789239, 3017584.2247112356], [4153491.4015700785, 3019097.7878893944], [4150444.551227561, 3022989.8074903744], [4149428.9344467223, 3026449.3804690233], [4153745.305765288, 3026233.157157858], [4156538.2519125957, 3030125.176758838], [4168979.5574778738, 3028395.3902695132], [4170249.0784539226, 3031206.2933146656], [4168471.7490874543, 3033368.5264263214], [4174565.4497724883, 3035314.5362268114], [4176850.587529376, 3034665.866293315]]]}}, {"type": "Feature", "properties": {"id": "DEB1B", "na": "Westerwaldkreis", "AGS": "07143"}, "geometry": {"type": "Polygon", "coordinates": [[[4182436.479823991, 3066883.139656983], [4188530.180509025, 3065585.7997899894], [4187260.6595329763, 3062342.4501225064], [4190053.605680284, 3055855.7507875394], [4187514.5637281863, 3048720.381519076], [4182182.575628781, 3051315.0612530624], [4178627.916895845, 3047639.264963248], [4176850.587529376, 3034665.866293315], [4174565.4497724883, 3035314.5362268114], [4168471.7490874543, 3033368.5264263214], [4170249.0784539226, 3031206.2933146656], [4168979.5574778738, 3028395.3902695132], [4156538.2519125957, 3030125.176758838], [4154760.922546127, 3032503.633181659], [4153491.4015700785, 3033800.9730486525], [4155522.635131757, 3036828.09940497], [4150444.551227561, 3042017.4588729437], [4156284.3477173857, 3045260.808540427], [4158315.5812790636, 3052612.401120056], [4155776.5393269663, 3056288.19740987], [4158315.5812790636, 3059315.323766188], [4158569.4854742736, 3067315.586279314], [4162631.9525976297, 3072072.4991249563], [4170756.886844342, 3066234.4697234863], [4173295.9287964394, 3069694.042702135], [4182436.479823991, 3066883.139656983]]]}}, {"type": "Feature", "properties": {"id": "DEB21", "na": "Trier, Kreisfreie Stadt", "AGS": "07211"}, "geometry": {"type": "Polygon", "coordinates": [[[4083921.6520826044, 2961366.1638081903], [4073003.7716885842, 2960068.8239411972], [4072749.8674933743, 2964393.290164508], [4077574.04720236, 2966987.969898495], [4081890.418520926, 2976718.018900945], [4083413.8436921844, 2976285.572278614], [4086968.502425121, 2971961.1060553025], [4086206.789839492, 2967852.863143157], [4082144.3227161355, 2966339.299964998], [4085445.0772538623, 2963744.6202310114], [4083921.6520826044, 2961366.1638081903]]]}}, {"type": "Feature", "properties": {"id": "DEB22", "na": "Bernkastel-Wittlich", "AGS": "07231"}, "geometry": {"type": "Polygon", "coordinates": [[[4104995.700285014, 3002881.0395519775], [4113374.538726936, 2998556.5733286664], [4115659.676483824, 2991421.204060203], [4120229.9519975996, 2987529.184459223], [4124038.5149257462, 2984718.2814140706], [4120737.7603880195, 2980177.591879594], [4121499.4729736485, 2978447.8053902695], [4124292.419120956, 2975204.455722786], [4114136.2513125655, 2966771.7465873295], [4107788.6464323215, 2957257.920896045], [4102964.466723336, 2956176.8043402173], [4096109.0534526724, 2967852.863143157], [4100933.233161658, 2970447.5428771437], [4100679.328966448, 2972825.999299965], [4084937.2688634433, 2982123.601680084], [4084937.2688634433, 3002232.369618481], [4097886.382819141, 3005475.719285964], [4099917.616380819, 3000286.359817991], [4104995.700285014, 3002881.0395519775]]]}}, {"type": "Feature", "properties": {"id": "DEB23", "na": "Eifelkreis Bitburg-Pr\u00c3\u00bcm", "AGS": "07232"}, "geometry": {"type": "Polygon", "coordinates": [[[4066402.2626131307, 3029692.7301365067], [4077574.04720236, 3017800.448022401], [4074273.292664633, 3009583.96219811], [4076812.334616731, 3005259.4959747987], [4084937.2688634433, 3002232.369618481], [4084937.2688634433, 2982123.601680084], [4067417.8793939697, 2973690.892544627], [4064117.124856243, 2972825.999299965], [4050660.2025101255, 2983204.718235912], [4050152.394119706, 2988826.5243262164], [4046851.6395819793, 2989475.194259713], [4043043.0766538326, 3001151.2530626534], [4045074.3102155104, 3009151.5155757787], [4048628.968948447, 3014989.5449772486], [4048375.0647532376, 3020827.5743787186], [4060054.6577328863, 3029260.2835141756], [4065132.741637082, 3029692.7301365067], [4066402.2626131307, 3029692.7301365067]]]}}, {"type": "Feature", "properties": {"id": "DEB24", "na": "Vulkaneifel", "AGS": "07233"}, "geometry": {"type": "Polygon", "coordinates": [[[4093316.107305365, 3032719.856492825], [4092808.2989149457, 3029044.06020301], [4101441.0415520775, 3026233.157157858], [4106519.1254562726, 3030773.846692335], [4108296.454822741, 3029692.7301365067], [4108550.3590179505, 3024503.3706685333], [4112105.017750887, 3022773.5841792086], [4109312.0716035804, 3016935.5547777386], [4103980.083504175, 3017151.7780889045], [4105757.4128706437, 3006556.8358417917], [4104995.700285014, 3002881.0395519775], [4099917.616380819, 3000286.359817991], [4097886.382819141, 3005475.719285964], [4084937.2688634433, 3002232.369618481], [4076812.334616731, 3005259.4959747987], [4074273.292664633, 3009583.96219811], [4077574.04720236, 3017800.448022401], [4066402.2626131307, 3029692.7301365067], [4064117.124856243, 3036611.876093805], [4066402.2626131307, 3034665.866293315], [4079605.280764038, 3036179.429471473], [4085952.885644282, 3030125.176758838], [4093316.107305365, 3032719.856492825]]]}}, {"type": "Feature", "properties": {"id": "DEB25", "na": "Trier-Saarburg", "AGS": "07235"}, "geometry": {"type": "Polygon", "coordinates": [[[4107788.6464323215, 2957257.920896045], [4106265.2212610627, 2951852.3381169057], [4096362.9576478824, 2949257.658382919], [4075288.909445472, 2940608.725936297], [4059039.0409520473, 2944068.2989149457], [4057515.615780789, 2946446.755337767], [4062593.699684984, 2951852.3381169057], [4064117.124856243, 2955311.911095555], [4063101.508075404, 2956393.0276513826], [4069195.208760438, 2961582.3871193556], [4070718.6339316964, 2970879.989499475], [4067417.8793939697, 2973690.892544627], [4084937.2688634433, 2982123.601680084], [4100679.328966448, 2972825.999299965], [4100933.233161658, 2970447.5428771437], [4096109.0534526724, 2967852.863143157], [4102964.466723336, 2956176.8043402173], [4107788.6464323215, 2957257.920896045]], [[4083921.6520826044, 2961366.1638081903], [4085445.0772538623, 2963744.6202310114], [4082144.3227161355, 2966339.299964998], [4086206.789839492, 2967852.863143157], [4086968.502425121, 2971961.1060553025], [4083413.8436921844, 2976285.572278614], [4081890.418520926, 2976718.018900945], [4077574.04720236, 2966987.969898495], [4072749.8674933743, 2964393.290164508], [4073003.7716885842, 2960068.8239411972], [4083921.6520826044, 2961366.1638081903]]]}}, {"type": "Feature", "properties": {"id": "DEB31", "na": "Frankenthal (Pfalz), Kreisfreie Stadt", "AGS": "07311"}, "geometry": {"type": "Polygon", "coordinates": [[[4206811.282564128, 2937797.8228911445], [4205287.85739287, 2938446.492824641], [4202748.815440772, 2933257.133356668], [4198432.444122206, 2931743.5701785088], [4198940.252512625, 2938878.939446972], [4206811.282564128, 2941473.6191809587], [4206811.282564128, 2937797.8228911445]]]}}, {"type": "Feature", "properties": {"id": "DEB32", "na": "Kaiserslautern, Kreisfreie Stadt", "AGS": "07312"}, "geometry": {"type": "Polygon", "coordinates": [[[4164663.186159308, 2918770.1715085753], [4164155.377768888, 2918553.9481974095], [4148921.126056303, 2927419.1039551976], [4155776.5393269663, 2933257.133356668], [4165678.802940147, 2928716.443822191], [4166440.515525776, 2923959.530976549], [4162378.0484024202, 2922662.191109556], [4164663.186159308, 2918770.1715085753]]]}}, {"type": "Feature", "properties": {"id": "DEB33", "na": "Landau in der Pfalz, Kreisfreie Stadt", "AGS": "07313"}, "geometry": {"type": "Polygon", "coordinates": [[[4188530.180509025, 2901039.8599929996], [4188022.3721186058, 2896282.9471473573], [4179897.4378718934, 2897364.063703185], [4179389.629481474, 2902769.646482324], [4187006.755337767, 2901904.753237662], [4188530.180509025, 2901039.8599929996]]]}}, {"type": "Feature", "properties": {"id": "DEB34", "na": "Ludwigshafen am Rhein, Kreisfreie Stadt", "AGS": "07314"}, "geometry": {"type": "Polygon", "coordinates": [[[4206811.282564128, 2937797.8228911445], [4208080.803540177, 2928500.2205110257], [4210365.941297065, 2926554.2107105358], [4204526.14480724, 2925256.870843542], [4201987.102855142, 2930013.783689184], [4198686.348317415, 2928932.6671333564], [4198432.444122206, 2931743.5701785088], [4202748.815440772, 2933257.133356668], [4205287.85739287, 2938446.492824641], [4206811.282564128, 2937797.8228911445]]]}}, {"type": "Feature", "properties": {"id": "DEB35", "na": "Mainz, Kreisfreie Stadt", "AGS": "07315"}, "geometry": {"type": "Polygon", "coordinates": [[[4198178.539926996, 2988394.077703885], [4201987.102855142, 2982339.8249912495], [4190561.414070703, 2985583.174658733], [4191323.126656333, 2992934.7672383618], [4195131.689584479, 2992069.8739936994], [4198178.539926996, 2988394.077703885]]]}}, {"type": "Feature", "properties": {"id": "DEB36", "na": "Neustadt an der Weinstra\u00c3\u0178e, Kreisfreie Stadt", "AGS": "07316"}, "geometry": {"type": "Polygon", "coordinates": [[[4198432.444122206, 2912283.472173609], [4198686.348317415, 2912067.248862443], [4189799.701485074, 2910986.1323066154], [4177358.395919796, 2915310.5985299265], [4175581.0665533273, 2916607.9383969195], [4186498.9469473474, 2921581.0745537276], [4192084.839241962, 2920067.511375569], [4192084.839241962, 2914878.1519075953], [4198432.444122206, 2912283.472173609]]]}}, {"type": "Feature", "properties": {"id": "DEB37", "na": "Pirmasens, Kreisfreie Stadt", "AGS": "07317"}, "geometry": {"type": "Polygon", "coordinates": [[[4151460.1680084, 2904499.432971649], [4148413.3176658833, 2897147.8403920196], [4139780.575028751, 2901688.5299264966], [4142827.4253712688, 2903850.763038152], [4146128.1799089955, 2905148.102905145], [4151460.1680084, 2904499.432971649]]]}}, {"type": "Feature", "properties": {"id": "DEB38", "na": "Speyer, Kreisfreie Stadt", "AGS": "07318"}, "geometry": {"type": "Polygon", "coordinates": [[[4209858.132906646, 2915310.5985299265], [4208334.707735387, 2912715.9187959395], [4210873.749687484, 2909688.792439622], [4209350.324516226, 2909040.1225061254], [4203002.719635982, 2915743.0451522577], [4206557.378368918, 2918337.724886244], [4209858.132906646, 2915310.5985299265]]]}}, {"type": "Feature", "properties": {"id": "DEB39", "na": "Worms, Kreisfreie Stadt", "AGS": "07319"}, "geometry": {"type": "Polygon", "coordinates": [[[4206303.474173709, 2943635.8522926145], [4202494.911245562, 2945149.4154707734], [4196655.114755738, 2942987.182359118], [4194877.78538927, 2943635.8522926145], [4194116.07280364, 2949690.1050052503], [4196655.114755738, 2950554.9982499126], [4195385.593779689, 2954447.0178508926], [4201479.294464723, 2953582.1246062303], [4202241.007050352, 2958771.4840742038], [4207319.090954548, 2958339.0374518726], [4209096.420321016, 2958771.4840742038], [4202494.911245562, 2954447.0178508926], [4206303.474173709, 2943635.8522926145]]]}}, {"type": "Feature", "properties": {"id": "DEB3A", "na": "Zweibr\u00c3\u00bccken, Kreisfreie Stadt", "AGS": "07320"}, "geometry": {"type": "Polygon", "coordinates": [[[4125561.9400970046, 2901039.8599929996], [4123530.706535327, 2906445.442772139], [4131655.6407820387, 2914878.1519075953], [4131909.5449772486, 2914445.705285264], [4133432.9701485075, 2904283.209660483], [4125561.9400970046, 2901039.8599929996]]]}}, {"type": "Feature", "properties": {"id": "DEB3B", "na": "Alzey-Worms", "AGS": "07331"}, "geometry": {"type": "Polygon", "coordinates": [[[4205795.665783289, 2966987.969898495], [4207572.995149758, 2962879.7269863496], [4211381.558077903, 2962447.280364018], [4209096.420321016, 2958987.707385369], [4209096.420321016, 2958771.4840742038], [4207319.090954548, 2958339.0374518726], [4202241.007050352, 2958771.4840742038], [4201479.294464723, 2953582.1246062303], [4195385.593779689, 2954447.0178508926], [4196655.114755738, 2950554.9982499126], [4194116.07280364, 2949690.1050052503], [4194877.78538927, 2943635.8522926145], [4191323.126656333, 2946879.201960098], [4187514.5637281863, 2947744.0952047603], [4187514.5637281863, 2951419.891494575], [4183198.1924096206, 2955311.911095555], [4169995.1742587127, 2962014.8337416872], [4172280.3120156005, 2963744.6202310114], [4171772.5036251815, 2968717.7563878195], [4174565.4497724883, 2970879.989499475], [4185737.234361718, 2978015.3587679383], [4190053.605680284, 2978015.3587679383], [4192592.6476323814, 2972609.7759887995], [4190815.318265913, 2971744.882744137], [4193862.1686084303, 2963312.1736086803], [4197670.7315365765, 2961149.940497025], [4199448.060903045, 2964825.7367868396], [4205795.665783289, 2966987.969898495]]]}}, {"type": "Feature", "properties": {"id": "DEB3C", "na": "Bad D\u00c3\u00bcrkheim", "AGS": "07332"}, "geometry": {"type": "Polygon", "coordinates": [[[4194877.78538927, 2943635.8522926145], [4196655.114755738, 2942987.182359118], [4195639.497974899, 2931094.9002450122], [4192846.5518275914, 2925689.3174658734], [4198432.444122206, 2912283.472173609], [4192084.839241962, 2914878.1519075953], [4192084.839241962, 2920067.511375569], [4186498.9469473474, 2921581.0745537276], [4175581.0665533273, 2916607.9383969195], [4171010.7910395516, 2912715.9187959395], [4165932.707135357, 2913364.5887294365], [4163393.665183259, 2914661.9285964295], [4164155.377768888, 2918553.9481974095], [4164663.186159308, 2918770.1715085753], [4173042.02460123, 2922878.414420721], [4174819.3539676983, 2925905.540777039], [4172534.2162108105, 2929581.3370668534], [4173549.8329916494, 2932824.6867343364], [4176596.6833341666, 2933689.5799789988], [4187514.5637281863, 2947744.0952047603], [4191323.126656333, 2946879.201960098], [4194877.78538927, 2943635.8522926145]]]}}, {"type": "Feature", "properties": {"id": "DEB3D", "na": "Donnersbergkreis", "AGS": "07333"}, "geometry": {"type": "Polygon", "coordinates": [[[4169995.1742587127, 2962014.8337416872], [4183198.1924096206, 2955311.911095555], [4187514.5637281863, 2951419.891494575], [4187514.5637281863, 2947744.0952047603], [4176596.6833341666, 2933689.5799789988], [4173549.8329916494, 2932824.6867343364], [4171772.5036251815, 2937365.3762688134], [4159839.0064503225, 2938014.0462023104], [4157553.8686934346, 2943419.6289814487], [4154507.0183509174, 2944284.522226111], [4155268.730936547, 2951419.891494575], [4157553.8686934346, 2956393.0276513826], [4156792.156107805, 2958987.707385369], [4166948.323916196, 2963744.6202310114], [4169995.1742587127, 2962014.8337416872]]]}}, {"type": "Feature", "properties": {"id": "DEB3E", "na": "Germersheim", "AGS": "07334"}, "geometry": {"type": "Polygon", "coordinates": [[[4205541.76158808, 2905364.3262163107], [4203510.528026401, 2903202.093104655], [4204780.04900245, 2901904.753237662], [4199701.965098254, 2886552.8981449073], [4194877.78538927, 2876606.6258312915], [4193608.264413221, 2875741.732586629], [4191577.0308515425, 2874228.1694084704], [4179643.533676684, 2878120.1890094504], [4181166.9588479423, 2887850.2380119003], [4184721.617580879, 2892174.704235212], [4194116.07280364, 2891742.2576128803], [4193862.1686084303, 2896715.3937696884], [4190815.318265913, 2896931.6170808543], [4192338.743437172, 2906877.8893944696], [4198686.348317415, 2910769.9089954495], [4200717.581879094, 2909688.792439622], [4205541.76158808, 2905364.3262163107]]]}}, {"type": "Feature", "properties": {"id": "DEB3F", "na": "Kaiserslautern, Landkreis", "AGS": "07335"}, "geometry": {"type": "Polygon", "coordinates": [[[4173549.8329916494, 2932824.6867343364], [4172534.2162108105, 2929581.3370668534], [4174819.3539676983, 2925905.540777039], [4173042.02460123, 2922878.414420721], [4164663.186159308, 2918770.1715085753], [4162378.0484024202, 2922662.191109556], [4166440.515525776, 2923959.530976549], [4165678.802940147, 2928716.443822191], [4155776.5393269663, 2933257.133356668], [4148921.126056303, 2927419.1039551976], [4164155.377768888, 2918553.9481974095], [4163393.665183259, 2914661.9285964295], [4160854.6232311614, 2912715.9187959395], [4158315.5812790636, 2917040.385019251], [4147397.7008850444, 2919202.6181309065], [4145112.5631281566, 2920716.1813090653], [4141050.0960048, 2916607.9383969195], [4132417.3533676686, 2920499.9579978995], [4131909.5449772486, 2920932.404620231], [4139018.862443122, 2934554.473223661], [4154507.0183509174, 2944284.522226111], [4157553.8686934346, 2943419.6289814487], [4159839.0064503225, 2938014.0462023104], [4171772.5036251815, 2937365.3762688134], [4173549.8329916494, 2932824.6867343364]]]}}, {"type": "Feature", "properties": {"id": "DEB3G", "na": "Kusel", "AGS": "07336"}, "geometry": {"type": "Polygon", "coordinates": [[[4155268.730936547, 2951419.891494575], [4154507.0183509174, 2944284.522226111], [4139018.862443122, 2934554.473223661], [4131909.5449772486, 2920932.404620231], [4125054.131706585, 2924175.754287714], [4124546.3233161657, 2925256.870843542], [4121753.3771688584, 2928067.773888694], [4125561.9400970046, 2932608.463423171], [4123784.6107305363, 2933905.8032901646], [4124038.5149257462, 2941041.172558628], [4130386.1198059903, 2946014.3087154357], [4135972.012100605, 2945581.8620931045], [4135210.2995149754, 2952284.784739237], [4142065.712785639, 2954879.4644732233], [4142319.616980849, 2957906.5908295414], [4144096.946347317, 2956393.0276513826], [4150952.359617981, 2955528.1344067203], [4152475.784789239, 2953798.3479173956], [4152221.8805940296, 2949690.1050052503], [4155268.730936547, 2951419.891494575]]]}}, {"type": "Feature", "properties": {"id": "DEB3H", "na": "S\u00c3\u00bcdliche Weinstra\u00c3\u0178e", "AGS": "07337"}, "geometry": {"type": "Polygon", "coordinates": [[[4198686.348317415, 2912067.248862443], [4198686.348317415, 2910769.9089954495], [4192338.743437172, 2906877.8893944696], [4190815.318265913, 2896931.6170808543], [4193862.1686084303, 2896715.3937696884], [4194116.07280364, 2891742.2576128803], [4184721.617580879, 2892174.704235212], [4181166.9588479423, 2887850.2380119003], [4179643.533676684, 2878120.1890094504], [4168217.844892245, 2883525.7717885897], [4166186.6113305665, 2884606.8883444173], [4164409.281964098, 2893255.8207910396], [4168979.5574778738, 2898228.9569478473], [4168217.844892245, 2904283.209660483], [4164409.281964098, 2907310.3360168007], [4166186.6113305665, 2910121.239061953], [4165932.707135357, 2913364.5887294365], [4171010.7910395516, 2912715.9187959395], [4175581.0665533273, 2916607.9383969195], [4177358.395919796, 2915310.5985299265], [4189799.701485074, 2910986.1323066154], [4198686.348317415, 2912067.248862443]], [[4188530.180509025, 2901039.8599929996], [4187006.755337767, 2901904.753237662], [4179389.629481474, 2902769.646482324], [4179897.4378718934, 2897364.063703185], [4188022.3721186058, 2896282.9471473573], [4188530.180509025, 2901039.8599929996]]]}}, {"type": "Feature", "properties": {"id": "DEB3I", "na": "Rhein-Pfalz-Kreis", "AGS": "07338"}, "geometry": {"type": "Polygon", "coordinates": [[[4206303.474173709, 2943635.8522926145], [4206811.282564128, 2942338.512425621], [4206811.282564128, 2941473.6191809587], [4198940.252512625, 2938878.939446972], [4198432.444122206, 2931743.5701785088], [4198686.348317415, 2928932.6671333564], [4201987.102855142, 2930013.783689184], [4204526.14480724, 2925256.870843542], [4210365.941297065, 2926554.2107105358], [4211889.366468323, 2923094.6377318865], [4209604.228711436, 2920499.9579978995], [4212143.270663533, 2920716.1813090653], [4209858.132906646, 2915310.5985299265], [4206557.378368918, 2918337.724886244], [4203002.719635982, 2915743.0451522577], [4209350.324516226, 2909040.1225061254], [4205541.76158808, 2905364.3262163107], [4200717.581879094, 2909688.792439622], [4198686.348317415, 2910769.9089954495], [4198686.348317415, 2912067.248862443], [4198432.444122206, 2912283.472173609], [4192846.5518275914, 2925689.3174658734], [4195639.497974899, 2931094.9002450122], [4196655.114755738, 2942987.182359118], [4202494.911245562, 2945149.4154707734], [4206303.474173709, 2943635.8522926145]]]}}, {"type": "Feature", "properties": {"id": "DEB3J", "na": "Mainz-Bingen", "AGS": "07339"}, "geometry": {"type": "Polygon", "coordinates": [[[4161616.335816791, 2997259.2334616734], [4169487.365868293, 2986664.2912145606], [4190307.5098754936, 2992934.7672383618], [4191323.126656333, 2992934.7672383618], [4190561.414070703, 2985583.174658733], [4201987.102855142, 2982339.8249912495], [4202241.007050352, 2974988.23241162], [4204780.04900245, 2972825.999299965], [4205795.665783289, 2966987.969898495], [4199448.060903045, 2964825.7367868396], [4197670.7315365765, 2961149.940497025], [4193862.1686084303, 2963312.1736086803], [4190815.318265913, 2971744.882744137], [4192592.6476323814, 2972609.7759887995], [4190053.605680284, 2978015.3587679383], [4185737.234361718, 2978015.3587679383], [4174565.4497724883, 2970879.989499475], [4174819.3539676983, 2973258.445922296], [4169487.365868293, 2981907.3783689183], [4158569.4854742736, 2989907.640882044], [4153745.305765288, 2993799.660483024], [4161108.5274263714, 2999205.2432621634], [4161616.335816791, 2997259.2334616734]]]}}, {"type": "Feature", "properties": {"id": "DEB3K", "na": "S\u00c3\u00bcdwestpfalz", "AGS": "07340"}, "geometry": {"type": "Polygon", "coordinates": [[[4163393.665183259, 2914661.9285964295], [4165932.707135357, 2913364.5887294365], [4166186.6113305665, 2910121.239061953], [4164409.281964098, 2907310.3360168007], [4168217.844892245, 2904283.209660483], [4168979.5574778738, 2898228.9569478473], [4164409.281964098, 2893255.8207910396], [4166186.6113305665, 2884606.8883444173], [4168217.844892245, 2883525.7717885897], [4148159.4134706734, 2885039.334966748], [4140542.287614381, 2890228.694434722], [4138257.149857493, 2898012.733636682], [4129116.5988299414, 2897796.5103255166], [4125561.9400970046, 2901039.8599929996], [4133432.9701485075, 2904283.209660483], [4131909.5449772486, 2914445.705285264], [4131655.6407820387, 2914878.1519075953], [4132417.3533676686, 2920499.9579978995], [4141050.0960048, 2916607.9383969195], [4145112.5631281566, 2920716.1813090653], [4147397.7008850444, 2919202.6181309065], [4158315.5812790636, 2917040.385019251], [4160854.6232311614, 2912715.9187959395], [4163393.665183259, 2914661.9285964295]], [[4151460.1680084, 2904499.432971649], [4146128.1799089955, 2905148.102905145], [4142827.4253712688, 2903850.763038152], [4139780.575028751, 2901688.5299264966], [4148413.3176658833, 2897147.8403920196], [4151460.1680084, 2904499.432971649]]]}}, {"type": "Feature", "properties": {"id": "DEC01", "na": "Regionalverband Saarbr\u00c3\u00bccken", "AGS": "10041"}, "geometry": {"type": "Polygon", "coordinates": [[[4111343.3051652582, 2914878.1519075953], [4107280.838041902, 2910769.9089954495], [4112105.017750887, 2907094.112705635], [4111597.209360468, 2899526.2968148408], [4109565.97579879, 2897796.5103255166], [4106265.2212610627, 2893039.5974798743], [4104995.700285014, 2901904.753237662], [4097124.6702335114, 2905796.772838642], [4090523.161158058, 2904931.8795939796], [4092046.5863293163, 2901039.8599929996], [4090015.3527676384, 2898012.733636682], [4083159.9394969745, 2899742.5201260066], [4081382.6101305066, 2902553.4231711584], [4082398.2269113455, 2906012.9961498072], [4092300.490524526, 2911418.5789289465], [4094077.8198909946, 2914661.9285964295], [4094331.7240862045, 2919851.2880644035], [4099155.9037951897, 2922878.414420721], [4099409.807990399, 2922445.96779839], [4111343.3051652582, 2914878.1519075953]]]}}, {"type": "Feature", "properties": {"id": "DEC02", "na": "Merzig-Wadern", "AGS": "10042"}, "geometry": {"type": "Polygon", "coordinates": [[[4097124.6702335114, 2936716.7063353164], [4089507.544377219, 2933473.3566678334], [4088745.8317915895, 2927635.3272663634], [4081128.7059352966, 2923094.6377318865], [4071226.4423221163, 2928716.443822191], [4062339.795489774, 2935635.5897794887], [4057769.5199759984, 2934986.9198459922], [4057261.7115855794, 2941689.8424921245], [4059039.0409520473, 2944068.2989149457], [4075288.909445472, 2940608.725936297], [4096362.9576478824, 2949257.658382919], [4097632.4786239313, 2947095.4252712633], [4101187.137356868, 2946014.3087154357], [4100425.424771238, 2937797.8228911445], [4097124.6702335114, 2936716.7063353164]]]}}, {"type": "Feature", "properties": {"id": "DEC03", "na": "Neunkirchen", "AGS": "10043"}, "geometry": {"type": "Polygon", "coordinates": [[[4121753.3771688584, 2928067.773888694], [4124546.3233161657, 2925256.870843542], [4119214.3352167606, 2921148.6279313965], [4122261.185559278, 2915959.2684634235], [4120737.7603880195, 2914229.481974099], [4116167.484874244, 2912283.472173609], [4111343.3051652582, 2914878.1519075953], [4099409.807990399, 2922445.96779839], [4099155.9037951897, 2922878.414420721], [4097378.5744287213, 2926986.6573328665], [4102710.5625281264, 2929365.113755688], [4107788.6464323215, 2926121.764088204], [4119722.1436071806, 2927851.550577529], [4121753.3771688584, 2928067.773888694]]]}}, {"type": "Feature", "properties": {"id": "DEC04", "na": "Saarlouis", "AGS": "10044"}, "geometry": {"type": "Polygon", "coordinates": [[[4102710.5625281264, 2929365.113755688], [4097378.5744287213, 2926986.6573328665], [4099155.9037951897, 2922878.414420721], [4094331.7240862045, 2919851.2880644035], [4094077.8198909946, 2914661.9285964295], [4092300.490524526, 2911418.5789289465], [4082398.2269113455, 2906012.9961498072], [4080366.9933496676, 2905580.5495274765], [4078081.85559278, 2910769.9089954495], [4078843.568178409, 2912932.1421071053], [4071480.346517326, 2920716.1813090653], [4069956.9213460675, 2928067.773888694], [4071226.4423221163, 2928716.443822191], [4081128.7059352966, 2923094.6377318865], [4088745.8317915895, 2927635.3272663634], [4089507.544377219, 2933473.3566678334], [4097124.6702335114, 2936716.7063353164], [4098394.1912095603, 2935203.143157158], [4097124.6702335114, 2934554.473223661], [4101441.0415520775, 2934986.9198459922], [4102710.5625281264, 2929365.113755688]]]}}, {"type": "Feature", "properties": {"id": "DEC05", "na": "Saarpfalz-Kreis", "AGS": "10045"}, "geometry": {"type": "Polygon", "coordinates": [[[4131909.5449772486, 2920932.404620231], [4132417.3533676686, 2920499.9579978995], [4131655.6407820387, 2914878.1519075953], [4123530.706535327, 2906445.442772139], [4125561.9400970046, 2901039.8599929996], [4129116.5988299414, 2897796.5103255166], [4123276.802340117, 2892823.3741687085], [4113628.442922146, 2893688.2674133703], [4109565.97579879, 2897796.5103255166], [4111597.209360468, 2899526.2968148408], [4112105.017750887, 2907094.112705635], [4107280.838041902, 2910769.9089954495], [4111343.3051652582, 2914878.1519075953], [4116167.484874244, 2912283.472173609], [4120737.7603880195, 2914229.481974099], [4122261.185559278, 2915959.2684634235], [4119214.3352167606, 2921148.6279313965], [4124546.3233161657, 2925256.870843542], [4125054.131706585, 2924175.754287714], [4131909.5449772486, 2920932.404620231]]]}}, {"type": "Feature", "properties": {"id": "DEC06", "na": "St. Wendel", "AGS": "10046"}, "geometry": {"type": "Polygon", "coordinates": [[[4124038.5149257462, 2941041.172558628], [4123784.6107305363, 2933905.8032901646], [4125561.9400970046, 2932608.463423171], [4121753.3771688584, 2928067.773888694], [4119722.1436071806, 2927851.550577529], [4107788.6464323215, 2926121.764088204], [4102710.5625281264, 2929365.113755688], [4101441.0415520775, 2934986.9198459922], [4097124.6702335114, 2934554.473223661], [4098394.1912095603, 2935203.143157158], [4097124.6702335114, 2936716.7063353164], [4100425.424771238, 2937797.8228911445], [4101187.137356868, 2946014.3087154357], [4097632.4786239313, 2947095.4252712633], [4096362.9576478824, 2949257.658382919], [4106265.2212610627, 2951852.3381169057], [4108550.3590179505, 2950771.221561078], [4120229.9519975996, 2942987.182359118], [4123530.706535327, 2944933.192159608], [4124038.5149257462, 2941041.172558628]]]}}, {"type": "Feature", "properties": {"id": "DED21", "na": "Dresden, Kreisfreie Stadt", "AGS": "14612"}, "geometry": {"type": "Polygon", "coordinates": [[[4598839.359967998, 3113154.9282464124], [4598839.359967998, 3109911.578578929], [4595284.7012350615, 3106019.5589779485], [4588937.096354818, 3102992.432621631], [4573702.844642232, 3108614.2387119355], [4571925.515275763, 3112073.8116905848], [4579288.736936847, 3116398.2779138954], [4584366.820841042, 3125047.2103605177], [4591983.946697335, 3123317.4238711935], [4594776.892844642, 3115533.384669233], [4598839.359967998, 3113154.9282464124]]]}}, {"type": "Feature", "properties": {"id": "DED2C", "na": "Bautzen", "AGS": "14625"}, "geometry": {"type": "Polygon", "coordinates": [[[4635655.468273413, 3113154.9282464124], [4631085.192759638, 3110344.02520126], [4623468.066903345, 3113803.598179909], [4611280.665533276, 3115317.1613580678], [4598839.359967998, 3113154.9282464124], [4594776.892844642, 3115533.384669233], [4591983.946697335, 3123317.4238711935], [4584366.820841042, 3125047.2103605177], [4585890.2460123, 3139534.1722086105], [4589698.808940447, 3143426.1918095904], [4587921.479573978, 3147750.6580329016], [4599093.264163208, 3148831.7745887293], [4605948.677433872, 3164832.299614981], [4609757.240362018, 3167210.7560378015], [4622198.545927296, 3165264.7462373115], [4629307.863393169, 3168508.0959047955], [4632354.713735687, 3158345.600280014], [4635147.659882994, 3156615.813790689], [4631339.096954848, 3146669.541477074], [4632608.617930897, 3144291.0850542528], [4640987.456372818, 3144291.0850542528], [4649366.294814741, 3129371.6765838293], [4640225.743787189, 3117695.617780889], [4634385.9472973645, 3116398.2779138954], [4635655.468273413, 3113154.9282464124]]]}}, {"type": "Feature", "properties": {"id": "DED2D", "na": "G\u00c3\u00b6rlitz", "AGS": "14626"}, "geometry": {"type": "Polygon", "coordinates": [[[4648604.582229111, 3174129.9019950996], [4647335.061253062, 3171967.668883444], [4649366.294814741, 3167859.4259712985], [4664600.546527326, 3162886.289814491], [4666631.780089004, 3159642.9401470073], [4665870.067503375, 3154453.580679034], [4667139.588479424, 3150994.007700385], [4671709.8639932, 3143642.4151207563], [4672471.576578829, 3138020.6090304516], [4666123.971698585, 3107533.122156108], [4660284.17520876, 3095424.616730836], [4656729.516475824, 3089586.5873293662], [4646065.540277014, 3093262.383619181], [4647588.965448272, 3101262.6461323067], [4641749.168958448, 3099749.082954148], [4643780.402520126, 3107533.122156108], [4635655.468273413, 3113154.9282464124], [4634385.9472973645, 3116398.2779138954], [4640225.743787189, 3117695.617780889], [4649366.294814741, 3129371.6765838293], [4640987.456372818, 3144291.0850542528], [4632608.617930897, 3144291.0850542528], [4631339.096954848, 3146669.541477074], [4635147.659882994, 3156615.813790689], [4632354.713735687, 3158345.600280014], [4629307.863393169, 3168508.0959047955], [4637432.797639882, 3173265.0087504378], [4645049.923496175, 3170454.1057052854], [4647081.157057853, 3175643.4651732584], [4648604.582229111, 3174129.9019950996]]]}}, {"type": "Feature", "properties": {"id": "DED2E", "na": "Mei\u00c3\u0178en", "AGS": "14627"}, "geometry": {"type": "Polygon", "coordinates": [[[4578019.215960798, 3146885.7647882393], [4587921.479573978, 3147750.6580329016], [4589698.808940447, 3143426.1918095904], [4585890.2460123, 3139534.1722086105], [4584366.820841042, 3125047.2103605177], [4579288.736936847, 3116398.2779138954], [4571925.515275763, 3112073.8116905848], [4561007.634881744, 3108181.792089605], [4550851.467073353, 3107316.8988449425], [4544249.9579978995, 3129371.6765838293], [4545519.478973948, 3133696.14280714], [4544757.766388319, 3141912.6286314316], [4542472.628631432, 3145372.2016100804], [4544249.9579978995, 3148615.551277564], [4558214.688734436, 3153156.240812041], [4567101.335566778, 3147101.9880994046], [4578019.215960798, 3146885.7647882393]]]}}, {"type": "Feature", "properties": {"id": "DED2F", "na": "S\u00c3\u00a4chsische Schweiz-Osterzgebirge", "AGS": "14628"}, "geometry": {"type": "Polygon", "coordinates": [[[4623468.066903345, 3113803.598179909], [4619913.408170409, 3106019.5589779485], [4629815.671783589, 3101046.422821141], [4629561.767588379, 3096938.1799089955], [4595792.509625481, 3082883.664683234], [4596046.413820691, 3077694.305215261], [4592999.563478174, 3075532.072103605], [4578780.928546427, 3075099.625481274], [4567609.143957198, 3086775.684284214], [4561769.347467373, 3098019.296464823], [4562784.964248212, 3106668.2289114455], [4561007.634881744, 3108181.792089605], [4571925.515275763, 3112073.8116905848], [4573702.844642232, 3108614.2387119355], [4588937.096354818, 3102992.432621631], [4595284.7012350615, 3106019.5589779485], [4598839.359967998, 3109911.578578929], [4598839.359967998, 3113154.9282464124], [4611280.665533276, 3115317.1613580678], [4623468.066903345, 3113803.598179909]]]}}, {"type": "Feature", "properties": {"id": "DED41", "na": "Chemnitz, Kreisfreie Stadt", "AGS": "14511"}, "geometry": {"type": "Polygon", "coordinates": [[[4535871.119555978, 3081802.5481274063], [4527492.281114056, 3074018.5089254463], [4521144.676233811, 3080505.2082604133], [4516828.304915246, 3078991.645082254], [4516066.592329617, 3081370.101505075], [4518351.7300865045, 3087640.5775288763], [4524699.334966748, 3090883.9271963597], [4535617.215360768, 3085478.344417221], [4535871.119555978, 3081802.5481274063]]]}}, {"type": "Feature", "properties": {"id": "DED42", "na": "Erzgebirgskreis", "AGS": "14521"}, "geometry": {"type": "Polygon", "coordinates": [[[4568624.760738037, 3063856.0133006647], [4566085.71878594, 3060180.2170108506], [4559992.018100904, 3062774.896744837], [4551359.275463773, 3058882.877143857], [4547550.712535627, 3048504.15820791], [4537902.353117656, 3047855.4882744136], [4530539.131456573, 3036611.876093805], [4521144.676233811, 3042449.905495275], [4513527.550377519, 3036395.652782639], [4504640.903545177, 3035963.206160308], [4495246.448322416, 3046341.925096255], [4500070.628031401, 3051315.0612530624], [4505148.711935597, 3059531.547077354], [4512765.83779189, 3062558.6734336717], [4513019.741987099, 3067531.8095904794], [4507433.849692484, 3070342.7126356317], [4507941.658082904, 3074667.178858943], [4512511.93359668, 3073153.615680784], [4516828.304915246, 3078991.645082254], [4521144.676233811, 3080505.2082604133], [4527492.281114056, 3074018.5089254463], [4535871.119555978, 3081802.5481274063], [4537902.353117656, 3079424.091704585], [4550089.754487724, 3078991.645082254], [4552628.796439822, 3075099.625481274], [4558468.592929646, 3076613.188659433], [4558976.401320066, 3072504.945747287], [4568624.760738037, 3063856.0133006647]]]}}, {"type": "Feature", "properties": {"id": "DED43", "na": "Mittelsachsen", "AGS": "14522"}, "geometry": {"type": "Polygon", "coordinates": [[[4561007.634881744, 3108181.792089605], [4562784.964248212, 3106668.2289114455], [4561769.347467373, 3098019.296464823], [4567609.143957198, 3086775.684284214], [4578780.928546427, 3075099.625481274], [4569894.2817140855, 3071856.275813791], [4571417.706885344, 3068829.149457473], [4568624.760738037, 3063856.0133006647], [4558976.401320066, 3072504.945747287], [4558468.592929646, 3076613.188659433], [4552628.796439822, 3075099.625481274], [4550089.754487724, 3078991.645082254], [4537902.353117656, 3079424.091704585], [4535871.119555978, 3081802.5481274063], [4535617.215360768, 3085478.344417221], [4524699.334966748, 3090883.9271963597], [4518351.7300865045, 3087640.5775288763], [4508449.466473323, 3093478.606930346], [4507433.849692484, 3093694.830241512], [4504640.903545177, 3099965.306265313], [4513527.550377519, 3102559.9859993], [4511496.316815841, 3109262.9086454324], [4513019.741987099, 3114236.04480224], [4523429.813990699, 3113587.374868743], [4523429.813990699, 3117479.394469723], [4520382.963648182, 3119857.8508925447], [4525461.047552377, 3127209.4434721735], [4544249.9579978995, 3129371.6765838293], [4550851.467073353, 3107316.8988449425], [4561007.634881744, 3108181.792089605]]]}}, {"type": "Feature", "properties": {"id": "DED44", "na": "Vogtlandkreis", "AGS": "14523"}, "geometry": {"type": "Polygon", "coordinates": [[[4500070.628031401, 3051315.0612530624], [4495246.448322416, 3046341.925096255], [4504640.903545177, 3035963.206160308], [4491691.78958948, 3026016.9338466926], [4487375.418270914, 3017151.7780889045], [4487883.226661333, 3009367.738886944], [4484582.472123606, 3009800.1855092756], [4483312.951147557, 3011962.418620931], [4484582.472123606, 3014773.3216660833], [4476457.537876894, 3025584.487224361], [4470617.741387069, 3024935.8172908644], [4465793.561678084, 3026233.157157858], [4459192.05260263, 3035746.9828491425], [4457414.723236162, 3036395.652782639], [4460461.573578679, 3043314.798739937], [4453606.1603080155, 3049152.828141407], [4458684.24421221, 3055207.0808540424], [4463254.519725986, 3060180.2170108506], [4465031.849092455, 3055639.527476374], [4464016.232311616, 3052612.401120056], [4466301.370068504, 3050882.6146307318], [4472902.879143957, 3059315.323766188], [4478996.579828992, 3059747.7703885194], [4484836.376318816, 3065369.576478824], [4486105.897294864, 3065153.3531676587], [4492453.5021751085, 3061045.1102555124], [4494230.831541577, 3057801.7605880294], [4493723.023151157, 3052828.6244312217], [4500070.628031401, 3051315.0612530624]]]}}, {"type": "Feature", "properties": {"id": "DED45", "na": "Zwickau", "AGS": "14524"}, "geometry": {"type": "Polygon", "coordinates": [[[4518351.7300865045, 3087640.5775288763], [4516066.592329617, 3081370.101505075], [4516828.304915246, 3078991.645082254], [4512511.93359668, 3073153.615680784], [4507941.658082904, 3074667.178858943], [4507433.849692484, 3070342.7126356317], [4513019.741987099, 3067531.8095904794], [4512765.83779189, 3062558.6734336717], [4505148.711935597, 3059531.547077354], [4500070.628031401, 3051315.0612530624], [4493723.023151157, 3052828.6244312217], [4494230.831541577, 3057801.7605880294], [4492453.5021751085, 3061045.1102555124], [4486105.897294864, 3065153.3531676587], [4484836.376318816, 3065369.576478824], [4478234.867243363, 3072072.4991249563], [4479504.388219411, 3080937.654882744], [4507433.849692484, 3093694.830241512], [4508449.466473323, 3093478.606930346], [4518351.7300865045, 3087640.5775288763]]]}}, {"type": "Feature", "properties": {"id": "DED51", "na": "Leipzig, Kreisfreie Stadt", "AGS": "14713"}, "geometry": {"type": "Polygon", "coordinates": [[[4494992.544127206, 3141912.6286314316], [4498293.298664933, 3137804.385719286], [4494484.735736786, 3130669.0164508224], [4484836.376318816, 3134344.812740637], [4482551.238561928, 3128290.5600280017], [4478742.675633782, 3127641.8900945047], [4477219.250462523, 3139966.6188309416], [4478742.675633782, 3147966.881344067], [4492707.4063703185, 3150777.7843892192], [4492707.4063703185, 3142561.298564928], [4494992.544127206, 3141912.6286314316]]]}}, {"type": "Feature", "properties": {"id": "DED52", "na": "Leipzig", "AGS": "14729"}, "geometry": {"type": "Polygon", "coordinates": [[[4525461.047552377, 3127209.4434721735], [4520382.963648182, 3119857.8508925447], [4523429.813990699, 3117479.394469723], [4523429.813990699, 3113587.374868743], [4513019.741987099, 3114236.04480224], [4511496.316815841, 3109262.9086454324], [4513527.550377519, 3102559.9859993], [4504640.903545177, 3099965.306265313], [4498293.298664933, 3101695.092754638], [4496262.065103255, 3108830.462023101], [4486105.897294864, 3111857.588379419], [4481027.813390669, 3111425.141757088], [4474680.208510425, 3116830.724536227], [4475695.825291265, 3121587.6373818694], [4472395.070753537, 3131750.13300665], [4470617.741387069, 3136507.0458522923], [4473918.495924796, 3138020.6090304516], [4477219.250462523, 3139966.6188309416], [4478742.675633782, 3127641.8900945047], [4482551.238561928, 3128290.5600280017], [4484836.376318816, 3134344.812740637], [4494484.735736786, 3130669.0164508224], [4498293.298664933, 3137804.385719286], [4494992.544127206, 3141912.6286314316], [4502863.574178709, 3144507.308365418], [4506164.3287164355, 3151858.900945047], [4516574.400720036, 3153156.240812041], [4525714.951747587, 3148831.7745887293], [4521144.676233811, 3136723.269163458], [4524445.430771539, 3132615.0262513123], [4523937.622381119, 3128290.5600280017], [4525461.047552377, 3127209.4434721735]]]}}, {"type": "Feature", "properties": {"id": "DED53", "na": "Nordsachsen", "AGS": "14730"}, "geometry": {"type": "Polygon", "coordinates": [[[4532062.556627831, 3175211.0185509278], [4534855.502775138, 3170886.552327616], [4539425.778288914, 3170237.8823941196], [4543488.245412271, 3162021.3965698285], [4544249.9579978995, 3148615.551277564], [4542472.628631432, 3145372.2016100804], [4544757.766388319, 3141912.6286314316], [4545519.478973948, 3133696.14280714], [4544249.9579978995, 3129371.6765838293], [4525461.047552377, 3127209.4434721735], [4523937.622381119, 3128290.5600280017], [4524445.430771539, 3132615.0262513123], [4521144.676233811, 3136723.269163458], [4525714.951747587, 3148831.7745887293], [4516574.400720036, 3153156.240812041], [4506164.3287164355, 3151858.900945047], [4502863.574178709, 3144507.308365418], [4494992.544127206, 3141912.6286314316], [4492707.4063703185, 3142561.298564928], [4492707.4063703185, 3150777.7843892192], [4478742.675633782, 3147966.881344067], [4477219.250462523, 3139966.6188309416], [4473918.495924796, 3138020.6090304516], [4470363.837191859, 3152507.570878544], [4473664.591729587, 3160075.3867693385], [4476457.537876894, 3164183.629681484], [4499562.819640982, 3171535.222261113], [4518859.5384769235, 3177589.4749737484], [4524699.334966748, 3173913.678683934], [4527492.281114056, 3177373.251662583], [4532062.556627831, 3175211.0185509278]]]}}, {"type": "Feature", "properties": {"id": "DEE01", "na": "Dessau-Ro\u00c3\u0178lau, Kreisfreie Stadt", "AGS": "15001"}, "geometry": {"type": "Polygon", "coordinates": [[[4482297.334366718, 3182995.0577528877], [4478488.771438572, 3190130.4270213507], [4474934.112705635, 3185373.5141757084], [4467316.9868493425, 3187968.1939096954], [4467063.0826541325, 3200725.3692684635], [4472648.974948747, 3208076.9618480923], [4477727.058852943, 3209158.07840392], [4477727.058852943, 3208076.9618480923], [4480773.909195459, 3200076.699334967], [4483312.951147557, 3183211.281064053], [4482297.334366718, 3182995.0577528877]]]}}, {"type": "Feature", "properties": {"id": "DEE02", "na": "Halle (Saale), Kreisfreie Stadt", "AGS": "15002"}, "geometry": {"type": "Polygon", "coordinates": [[[4460461.573578679, 3146020.871543577], [4456906.914845742, 3145804.6482324116], [4449797.597379869, 3157696.9303465174], [4456399.106455322, 3160291.610080504], [4460969.381969098, 3160724.056702835], [4463508.423921196, 3153804.910745537], [4460461.573578679, 3146020.871543577]]]}}, {"type": "Feature", "properties": {"id": "DEE03", "na": "Magdeburg, Kreisfreie Stadt", "AGS": "15003"}, "geometry": {"type": "Polygon", "coordinates": [[[4437610.1960098, 3233591.3125656284], [4436340.675033752, 3232077.749387469], [4441926.567328366, 3219536.797339867], [4433293.824691234, 3214563.661183059], [4430754.782739136, 3218888.1274063704], [4425422.794639732, 3219104.3507175357], [4428215.7407870395, 3230564.1862093103], [4435325.058252912, 3236618.438921946], [4437610.1960098, 3233591.3125656284]]]}}, {"type": "Feature", "properties": {"id": "DEE04", "na": "Altmarkkreis Salzwedel", "AGS": "15081"}, "geometry": {"type": "Polygon", "coordinates": [[[4428977.4533726685, 3262132.789639482], [4427200.124006201, 3256727.206860343], [4419329.093954697, 3254132.527126356], [4419836.902345117, 3256294.760238012], [4415012.722636132, 3258889.4399719983], [4399016.758337917, 3258889.4399719983], [4393176.961848092, 3266457.255862793], [4389622.303115156, 3265808.5859292964], [4384544.21921096, 3273592.6251312564], [4387083.261163058, 3279863.1011550575], [4383528.602430122, 3278349.5379768987], [4374895.85979299, 3289809.3734686733], [4372102.913645682, 3298890.752537627], [4372610.722036102, 3304080.1120056002], [4377688.8059402965, 3305161.228561428], [4384290.315015751, 3305377.4518725937], [4390891.824091204, 3312080.374518726], [4408157.309365468, 3308188.354917746], [4422122.040102005, 3315756.1708085407], [4423137.656882844, 3314458.8309415467], [4431262.591129556, 3311215.4812740637], [4431008.686934346, 3307107.2383619184], [4420090.806540327, 3304728.7819390967], [4426438.411420571, 3296296.07280364], [4421868.135906795, 3283538.897444872], [4415520.5310265515, 3280079.3244662234], [4428469.644982249, 3279863.1011550575], [4427454.02820141, 3269484.3822191106], [4429993.070153507, 3266241.0325516276], [4428977.4533726685, 3262132.789639482]]]}}, {"type": "Feature", "properties": {"id": "DEE05", "na": "Anhalt-Bitterfeld", "AGS": "15082"}, "geometry": {"type": "Polygon", "coordinates": [[[4484074.663733186, 3217590.787539377], [4477727.058852943, 3209158.07840392], [4472648.974948747, 3208076.9618480923], [4467063.0826541325, 3200725.3692684635], [4467316.9868493425, 3187968.1939096954], [4474934.112705635, 3185373.5141757084], [4478488.771438572, 3190130.4270213507], [4482297.334366718, 3182995.0577528877], [4481789.525976298, 3181049.0479523977], [4484836.376318816, 3178670.591529576], [4492199.597979899, 3179751.7080854042], [4499562.819640982, 3171535.222261113], [4476457.537876894, 3164183.629681484], [4473664.591729587, 3160075.3867693385], [4470871.645582279, 3165697.192859643], [4461731.094554728, 3166345.8627931396], [4463000.615530776, 3168724.319215961], [4462238.902945147, 3172400.1155057754], [4450559.309965498, 3174562.348617431], [4450051.501575079, 3175427.241862093], [4448020.268013401, 3176292.1351067554], [4450051.501575079, 3186022.1841092054], [4449035.88479424, 3193590], [4459953.765188259, 3198563.1361568077], [4450559.309965498, 3209158.07840392], [4450813.214160708, 3211968.9814490722], [4463254.519725986, 3220401.690584529], [4476965.346267313, 3224077.486874344], [4479758.2924146205, 3222780.1470073503], [4484074.663733186, 3217590.787539377]]]}}, {"type": "Feature", "properties": {"id": "DEE06", "na": "Jerichower Land", "AGS": "15086"}, "geometry": {"type": "Polygon", "coordinates": [[[4468332.603630181, 3268619.4889744488], [4474172.400120006, 3269916.8288414422], [4479250.484024201, 3265808.5859292964], [4478488.771438572, 3262997.682884144], [4476965.346267313, 3259538.1099054953], [4478234.867243363, 3250889.177458873], [4474172.400120006, 3239861.788589429], [4477980.963048153, 3237699.555477774], [4472648.974948747, 3231212.856142807], [4476965.346267313, 3224077.486874344], [4463254.519725986, 3220401.690584529], [4450813.214160708, 3211968.9814490722], [4447258.555427771, 3218239.457472874], [4442434.375718785, 3218888.1274063704], [4441926.567328366, 3219536.797339867], [4436340.675033752, 3232077.749387469], [4437610.1960098, 3233591.3125656284], [4437102.387619381, 3237915.778788939], [4443957.800890044, 3248726.944347217], [4444973.417670883, 3248726.944347217], [4447258.555427771, 3248510.7210360514], [4456399.106455322, 3259754.3332166607], [4455383.489674483, 3271646.6153307664], [4456399.106455322, 3275322.411620581], [4456399.106455322, 3269700.6055302764], [4468332.603630181, 3268619.4889744488]]]}}, {"type": "Feature", "properties": {"id": "DEE07", "na": "B\u00c3\u00b6rde", "AGS": "15083"}, "geometry": {"type": "Polygon", "coordinates": [[[4428977.4533726685, 3262132.789639482], [4436594.579228962, 3262349.0129506476], [4438118.00440022, 3256943.4301715083], [4445989.034451722, 3254132.527126356], [4447258.555427771, 3248510.7210360514], [4444973.417670883, 3248726.944347217], [4443957.800890044, 3248726.944347217], [4437102.387619381, 3237915.778788939], [4437610.1960098, 3233591.3125656284], [4435325.058252912, 3236618.438921946], [4428215.7407870395, 3230564.1862093103], [4425422.794639732, 3219104.3507175357], [4430754.782739136, 3218888.1274063704], [4433293.824691234, 3214563.661183059], [4431008.686934346, 3213266.3213160657], [4430754.782739136, 3207428.2919145958], [4424661.082054103, 3206995.8452922646], [4418313.477173858, 3211536.5348267416], [4413489.297464874, 3206563.3986699334], [4413235.393269664, 3199860.476023801], [4403333.1296564825, 3202455.1557577876], [4400286.279313966, 3210671.641582079], [4387083.261163058, 3216725.8942947146], [4391907.440872043, 3229699.2929646485], [4390384.015700785, 3232726.419320966], [4395208.19540977, 3235969.768988449], [4391653.536676833, 3245051.148057403], [4393176.961848092, 3249591.8375918795], [4391653.536676833, 3253267.6338816937], [4384544.21921096, 3261700.3430171506], [4384544.21921096, 3262997.682884144], [4389622.303115156, 3265808.5859292964], [4393176.961848092, 3266457.255862793], [4399016.758337917, 3258889.4399719983], [4415012.722636132, 3258889.4399719983], [4419836.902345117, 3256294.760238012], [4419329.093954697, 3254132.527126356], [4427200.124006201, 3256727.206860343], [4428977.4533726685, 3262132.789639482]]]}}, {"type": "Feature", "properties": {"id": "DEE08", "na": "Burgenland (DE)", "AGS": "15084"}, "geometry": {"type": "Polygon", "coordinates": [[[4472395.070753537, 3131750.13300665], [4475695.825291265, 3121587.6373818694], [4474680.208510425, 3116830.724536227], [4481027.813390669, 3111425.141757088], [4478742.675633782, 3105370.8890444525], [4481789.525976298, 3103641.102555128], [4477219.250462523, 3094775.9467973397], [4475441.921096055, 3096289.5099754985], [4472902.879143957, 3096505.7332866644], [4470871.645582279, 3096938.1799089955], [4463000.615530776, 3097370.626531326], [4453606.1603080155, 3106452.00560028], [4440149.237961898, 3108398.01540077], [4439895.333766688, 3109911.578578929], [4433039.920496024, 3112722.4816240813], [4424914.986249313, 3111425.141757088], [4422629.848492425, 3115965.8312915647], [4424914.986249313, 3118128.06440322], [4423645.465273264, 3121155.1907595377], [4418313.477173858, 3122236.3073153654], [4416536.14780739, 3125263.4336716835], [4417805.668783439, 3126993.2201610077], [4423899.369468473, 3132615.0262513123], [4428977.4533726685, 3130452.793139657], [4435071.154057703, 3134993.482674134], [4439641.429571479, 3129804.12320616], [4443703.896694834, 3131750.13300665], [4450051.501575079, 3126560.773538677], [4463508.423921196, 3132615.0262513123], [4466047.465873294, 3129371.6765838293], [4472395.070753537, 3131750.13300665]]]}}, {"type": "Feature", "properties": {"id": "DEE09", "na": "Harz", "AGS": "15085"}, "geometry": {"type": "Polygon", "coordinates": [[[4413235.393269664, 3199860.476023801], [4411965.872293615, 3194022.446622331], [4406379.979999, 3189481.7570878547], [4410696.351317566, 3184076.1743087154], [4417551.764588229, 3185373.5141757084], [4417805.668783439, 3180832.824641232], [4417551.764588229, 3177373.251662583], [4407903.405170258, 3171318.9989499478], [4406379.979999, 3165913.4161708085], [4399270.662533127, 3162453.8431921597], [4398001.141557078, 3163751.183059153], [4400032.375118756, 3164399.8529926497], [4392161.345067253, 3168724.319215961], [4384544.21921096, 3167643.202660133], [4375403.668183409, 3170454.1057052854], [4369563.871693585, 3170454.1057052854], [4364231.8835941795, 3183211.281064053], [4361185.033251663, 3185589.737486874], [4360677.224861243, 3192725.1067553377], [4365501.404570228, 3200076.699334967], [4363470.171008551, 3206563.3986699334], [4359661.608080404, 3210671.641582079], [4375911.476573829, 3215644.777738887], [4387083.261163058, 3216725.8942947146], [4400286.279313966, 3210671.641582079], [4403333.1296564825, 3202455.1557577876], [4413235.393269664, 3199860.476023801]]]}}, {"type": "Feature", "properties": {"id": "DEE0A", "na": "Mansfeld-S\u00c3\u00bcdharz", "AGS": "15087"}, "geometry": {"type": "Polygon", "coordinates": [[[4442180.4715235755, 3170670.329016451], [4437864.10020501, 3163534.9597479873], [4439387.525376269, 3155967.1438571927], [4443703.896694834, 3149696.6678333916], [4428469.644982249, 3148615.551277564], [4420598.614930746, 3140615.288764438], [4420598.614930746, 3137588.1624081205], [4412981.489074454, 3145155.9782989146], [4401301.896094805, 3144074.861743087], [4389114.494724736, 3146669.541477074], [4385813.74018701, 3158561.823591179], [4382259.081454072, 3163751.183059153], [4386067.644382219, 3166129.639481974], [4384544.21921096, 3167643.202660133], [4392161.345067253, 3168724.319215961], [4400032.375118756, 3164399.8529926497], [4398001.141557078, 3163751.183059153], [4399270.662533127, 3162453.8431921597], [4406379.979999, 3165913.4161708085], [4407903.405170258, 3171318.9989499478], [4417551.764588229, 3177373.251662583], [4417805.668783439, 3180832.824641232], [4419836.902345117, 3179967.93139657], [4442180.4715235755, 3170670.329016451]]]}}, {"type": "Feature", "properties": {"id": "DEE0B", "na": "Saalekreis", "AGS": "15088"}, "geometry": {"type": "Polygon", "coordinates": [[[4473664.591729587, 3160075.3867693385], [4470363.837191859, 3152507.570878544], [4473918.495924796, 3138020.6090304516], [4470617.741387069, 3136507.0458522923], [4472395.070753537, 3131750.13300665], [4466047.465873294, 3129371.6765838293], [4463508.423921196, 3132615.0262513123], [4450051.501575079, 3126560.773538677], [4443703.896694834, 3131750.13300665], [4439641.429571479, 3129804.12320616], [4435071.154057703, 3134993.482674134], [4428977.4533726685, 3130452.793139657], [4423899.369468473, 3132615.0262513123], [4420598.614930746, 3137588.1624081205], [4420598.614930746, 3140615.288764438], [4428469.644982249, 3148615.551277564], [4443703.896694834, 3149696.6678333916], [4439387.525376269, 3155967.1438571927], [4437864.10020501, 3163534.9597479873], [4442180.4715235755, 3170670.329016451], [4450051.501575079, 3175427.241862093], [4450559.309965498, 3174562.348617431], [4462238.902945147, 3172400.1155057754], [4463000.615530776, 3168724.319215961], [4461731.094554728, 3166345.8627931396], [4470871.645582279, 3165697.192859643], [4473664.591729587, 3160075.3867693385]], [[4460461.573578679, 3146020.871543577], [4463508.423921196, 3153804.910745537], [4460969.381969098, 3160724.056702835], [4456399.106455322, 3160291.610080504], [4449797.597379869, 3157696.9303465174], [4456906.914845742, 3145804.6482324116], [4460461.573578679, 3146020.871543577]]]}}, {"type": "Feature", "properties": {"id": "DEE0C", "na": "Salzlandkreis", "AGS": "15089"}, "geometry": {"type": "Polygon", "coordinates": [[[4450813.214160708, 3211968.9814490722], [4450559.309965498, 3209158.07840392], [4459953.765188259, 3198563.1361568077], [4449035.88479424, 3193590], [4450051.501575079, 3186022.1841092054], [4448020.268013401, 3176292.1351067554], [4450051.501575079, 3175427.241862093], [4442180.4715235755, 3170670.329016451], [4419836.902345117, 3179967.93139657], [4417805.668783439, 3180832.824641232], [4417551.764588229, 3185373.5141757084], [4410696.351317566, 3184076.1743087154], [4406379.979999, 3189481.7570878547], [4411965.872293615, 3194022.446622331], [4413235.393269664, 3199860.476023801], [4413489.297464874, 3206563.3986699334], [4418313.477173858, 3211536.5348267416], [4424661.082054103, 3206995.8452922646], [4430754.782739136, 3207428.2919145958], [4431008.686934346, 3213266.3213160657], [4433293.824691234, 3214563.661183059], [4441926.567328366, 3219536.797339867], [4442434.375718785, 3218888.1274063704], [4447258.555427771, 3218239.457472874], [4450813.214160708, 3211968.9814490722]]]}}, {"type": "Feature", "properties": {"id": "DEE0D", "na": "Stendal", "AGS": "15090"}, "geometry": {"type": "Polygon", "coordinates": [[[4464016.232311616, 3311215.4812740637], [4464016.232311616, 3307107.2383619184], [4471379.453972698, 3307972.13160658], [4472648.974948747, 3300404.315715786], [4470363.837191859, 3298458.3059152956], [4469602.12460623, 3293268.946447322], [4472395.070753537, 3286998.470423521], [4472141.166558328, 3282457.7808890445], [4466301.370068504, 3271862.8386419322], [4468332.603630181, 3268619.4889744488], [4456399.106455322, 3269700.6055302764], [4456399.106455322, 3275322.411620581], [4455383.489674483, 3271646.6153307664], [4456399.106455322, 3259754.3332166607], [4447258.555427771, 3248510.7210360514], [4445989.034451722, 3254132.527126356], [4438118.00440022, 3256943.4301715083], [4436594.579228962, 3262349.0129506476], [4428977.4533726685, 3262132.789639482], [4429993.070153507, 3266241.0325516276], [4427454.02820141, 3269484.3822191106], [4428469.644982249, 3279863.1011550575], [4415520.5310265515, 3280079.3244662234], [4421868.135906795, 3283538.897444872], [4426438.411420571, 3296296.07280364], [4420090.806540327, 3304728.7819390967], [4431008.686934346, 3307107.2383619184], [4431262.591129556, 3311215.4812740637], [4423137.656882844, 3314458.8309415467], [4422122.040102005, 3315756.1708085407], [4421360.327516376, 3317918.403920196], [4422629.848492425, 3323107.7633881695], [4428215.7407870395, 3326351.113055653], [4431008.686934346, 3326783.5596779836], [4430246.974348717, 3323756.433321666], [4445227.321866093, 3317269.733986699], [4443703.896694834, 3313810.1610080507], [4448528.07640382, 3311215.4812740637], [4464016.232311616, 3311215.4812740637]]]}}, {"type": "Feature", "properties": {"id": "DEE0E", "na": "Wittenberg", "AGS": "15091"}, "geometry": {"type": "Polygon", "coordinates": [[[4511242.412620631, 3211320.3115155757], [4516320.496524826, 3210239.1949597476], [4517082.209110456, 3206563.3986699334], [4524445.430771539, 3206995.8452922646], [4525461.047552377, 3203103.8256912846], [4530539.131456573, 3199860.476023801], [4537902.353117656, 3198995.582779139], [4536125.023751188, 3198779.359467973], [4539171.874093704, 3192725.1067553377], [4539679.682484124, 3180400.3780189008], [4532062.556627831, 3175211.0185509278], [4527492.281114056, 3177373.251662583], [4524699.334966748, 3173913.678683934], [4518859.5384769235, 3177589.4749737484], [4499562.819640982, 3171535.222261113], [4492199.597979899, 3179751.7080854042], [4484836.376318816, 3178670.591529576], [4481789.525976298, 3181049.0479523977], [4482297.334366718, 3182995.0577528877], [4483312.951147557, 3183211.281064053], [4480773.909195459, 3200076.699334967], [4477727.058852943, 3208076.9618480923], [4477727.058852943, 3209158.07840392], [4484074.663733186, 3217590.787539377], [4484836.376318816, 3217590.787539377], [4495500.352517625, 3211320.3115155757], [4503371.382569129, 3214779.8844942246], [4511242.412620631, 3211320.3115155757]]]}}, {"type": "Feature", "properties": {"id": "DEF01", "na": "Flensburg, Kreisfreie Stadt", "AGS": "01001"}, "geometry": {"type": "Polygon", "coordinates": [[[4288314.529226461, 3524195.4427721384], [4289076.24181209, 3518789.8599929996], [4285775.487274364, 3516411.4035701784], [4279681.786589329, 3519438.529926496], [4283998.157907896, 3524195.4427721384], [4283998.157907896, 3524411.666083304], [4284505.966298315, 3523114.3262163107], [4286283.295664784, 3523546.772838642], [4288314.529226461, 3524195.4427721384]]]}}, {"type": "Feature", "properties": {"id": "DEF02", "na": "Kiel, Kreisfreie Stadt", "AGS": "01002"}, "geometry": {"type": "Polygon", "coordinates": [[[4332239.95499775, 3471004.508225411], [4335286.805340267, 3469274.7217360865], [4334271.188559428, 3462571.7990899542], [4328939.200460022, 3461058.2359117954], [4324115.020751038, 3465815.1487574377], [4323099.403970199, 3472085.624781239], [4328685.296264813, 3473599.1879593977], [4331986.05080254, 3480734.557227861], [4333255.571778589, 3478356.10080504], [4332493.85919296, 3475761.4210710535], [4330970.434021701, 3471004.508225411], [4329954.817240862, 3467761.1585579277], [4332239.95499775, 3471004.508225411]]]}}, {"type": "Feature", "properties": {"id": "DEF03", "na": "L\u00c3\u00bcbeck, Kreisfreie Stadt", "AGS": "01003"}, "geometry": {"type": "Polygon", "coordinates": [[[4371341.201060053, 3411759.320966048], [4370579.488474423, 3411326.8743437175], [4369309.967498375, 3413705.330766538], [4368294.350717535, 3412624.2142107105], [4369817.775888794, 3411110.6510325517], [4363216.266813341, 3407002.408120406], [4359407.703885194, 3410894.427721386], [4357630.374518726, 3413489.107455373], [4359153.799689984, 3421273.146657333], [4374388.05140257, 3425597.612880644], [4376165.380769039, 3431868.088904445], [4378450.518525926, 3431435.6422821144], [4378958.326916345, 3430570.749037452], [4380227.847892394, 3428192.2926146304], [4379720.039501975, 3424516.4963248163], [4384544.21921096, 3422786.7098354916], [4371595.105255263, 3418678.466923346], [4370325.584279214, 3414354.000700035], [4371341.201060053, 3411759.320966048]]]}}, {"type": "Feature", "properties": {"id": "DEF04", "na": "Neum\u00c3\u00bcnster, Kreisfreie Stadt", "AGS": "01004"}, "geometry": {"type": "Polygon", "coordinates": [[[4323353.308165409, 3446787.4973748685], [4322591.595579779, 3439219.6814840743], [4324622.829141457, 3439003.4581729085], [4317259.607480374, 3434895.2152607627], [4316243.990699535, 3443976.5943297166], [4321575.97879894, 3448301.060553028], [4323353.308165409, 3446787.4973748685]]]}}, {"type": "Feature", "properties": {"id": "DEF05", "na": "Dithmarschen", "AGS": "01051"}, "geometry": {"type": "Polygon", "coordinates": [[[4267494.385219261, 3470139.614980749], [4273080.277513876, 3471004.508225411], [4274095.894294715, 3468842.275113756], [4272826.373318666, 3466896.2653132654], [4275873.223661182, 3463004.2457122854], [4281459.115955798, 3464950.2555127754], [4284759.870493525, 3460193.342667133], [4284505.966298315, 3451976.856842842], [4276127.127856392, 3447003.7206860343], [4275873.223661182, 3439868.351417571], [4273334.181709086, 3430354.525726286], [4269017.810390519, 3425381.389569478], [4268256.09780489, 3419543.360168008], [4256576.504825241, 3419543.360168008], [4254545.271263563, 3421273.146657333], [4249467.187359368, 3425597.612880644], [4244389.103455173, 3435760.108505425], [4249974.995749787, 3437922.341617081], [4254545.271263563, 3439435.9047952397], [4254037.462873144, 3440949.4679733985], [4253783.558677934, 3441165.6912845643], [4250736.708335416, 3447868.6139306966], [4248705.4747737385, 3447868.6139306966], [4245150.816040802, 3447868.6139306966], [4244135.199259963, 3450030.847042352], [4243119.582479124, 3452193.0801540078], [4244135.199259963, 3456301.323066153], [4244896.911845592, 3459544.6727336366], [4245404.720236012, 3461490.6825341266], [4245658.624431222, 3462788.02240112], [4249213.283164158, 3462355.575778789], [4255560.888044402, 3470139.614980749], [4254799.175458773, 3472734.294714736], [4256068.696434822, 3474896.527826391], [4259369.450972549, 3473815.4112705635], [4267494.385219261, 3470139.614980749]]]}}, {"type": "Feature", "properties": {"id": "DEF06", "na": "Herzogtum Lauenburg", "AGS": "01053"}, "geometry": {"type": "Polygon", "coordinates": [[[4371341.201060053, 3411759.320966048], [4371849.009450473, 3405056.398319916], [4381497.368868443, 3399434.5922296112], [4384036.410820541, 3393812.7861393066], [4381243.464673233, 3385380.07700385], [4377434.9017450875, 3384515.183759188], [4371087.296864843, 3375433.8046902344], [4363216.266813341, 3372190.4550227514], [4360677.224861243, 3362027.95939797], [4354329.619980999, 3363109.0759537974], [4352298.3864193205, 3364406.415820791], [4341380.506025301, 3369595.7752887644], [4342650.02700135, 3371325.561778089], [4336810.230511526, 3376514.921246062], [4348743.727686385, 3388407.2033601683], [4354583.524176208, 3389055.8732936643], [4347728.110905545, 3396407.4658732936], [4348235.919295965, 3399434.5922296112], [4350267.152857643, 3405272.621631081], [4359407.703885194, 3410894.427721386], [4363216.266813341, 3407002.408120406], [4369817.775888794, 3411110.6510325517], [4368294.350717535, 3412624.2142107105], [4369309.967498375, 3413705.330766538], [4370579.488474423, 3411326.8743437175], [4371341.201060053, 3411759.320966048]]]}}, {"type": "Feature", "properties": {"id": "DEF07", "na": "Nordfriesland", "AGS": "01054"}, "geometry": {"type": "MultiPolygon", "coordinates": [[[[4233471.223061153, 3534790.3850192507], [4263939.726486324, 3530033.472173609], [4264447.534876743, 3520519.646482324], [4261654.5887294365, 3517060.073503675], [4260638.971948598, 3511005.8207910396], [4270795.139756988, 3504951.568078404], [4272572.469123457, 3497167.528876444], [4276381.032051602, 3495005.295764788], [4277142.744637232, 3482464.343717186], [4269525.618780939, 3475761.4210710535], [4267494.385219261, 3470139.614980749], [4259369.450972549, 3473815.4112705635], [4256068.696434822, 3474896.527826391], [4254799.175458773, 3472734.294714736], [4255560.888044402, 3470139.614980749], [4249213.283164158, 3462355.575778789], [4245658.624431222, 3462788.02240112], [4236010.2650132505, 3464517.8088904447], [4233725.127256363, 3464734.03220161], [4230170.468523426, 3471436.9548477423], [4233471.223061153, 3472301.8480924047], [4236010.2650132505, 3472950.518025901], [4233725.127256363, 3475112.751137557], [4233217.318865944, 3475761.4210710535], [4234740.744037202, 3477923.6541827093], [4237279.785989299, 3478139.8774938746], [4246166.432821641, 3478788.547427371], [4248197.666383319, 3478788.547427371], [4248959.3789689485, 3478788.547427371], [4256830.409020451, 3488302.3731186558], [4255814.792239612, 3490248.3829191457], [4255053.079653982, 3491329.499474974], [4251244.516725836, 3486356.3633181658], [4251244.516725836, 3486140.1400070004], [4250736.708335416, 3485707.6933846693], [4249467.187359368, 3484194.1302065104], [4243627.390869543, 3485707.6933846693], [4243627.390869543, 3488734.819740987], [4244643.007650383, 3489383.489674484], [4247943.76218811, 3491978.1694084704], [4248197.666383319, 3493924.1792089604], [4249467.187359368, 3499545.985299265], [4246674.241212061, 3502789.3349667485], [4246420.337016851, 3502789.3349667485], [4242611.774088704, 3507113.8011900596], [4240580.540527026, 3509059.8109905496], [4238549.306965348, 3514032.9471473573], [4237787.594379719, 3515762.733636682], [4235248.552427622, 3521168.3164158207], [4231439.989499475, 3530033.472173609], [4230678.276913846, 3531547.0353517677], [4218998.683934197, 3527871.239061953], [4216459.641982099, 3530249.695484774], [4215190.12100605, 3531330.812040602], [4214428.408420421, 3531763.258662933], [4212651.079053952, 3529601.0255512777], [4211889.366468323, 3528519.9089954495], [4211635.462273113, 3523762.9961498072], [4211635.462273113, 3523330.5495274765], [4211381.558077903, 3520303.4231711584], [4211381.558077903, 3518789.8599929996], [4211381.558077903, 3516195.180259013], [4210112.0371018555, 3517492.520126006], [4211889.366468323, 3535222.831641582], [4218490.875543777, 3549061.1235561776], [4219252.588129407, 3550142.2401120057], [4219760.396519826, 3551439.5799789988], [4222807.246862343, 3549926.01680084], [4221029.917495875, 3547763.7836891846], [4219252.588129407, 3545817.7738886946], [4215444.02520126, 3541493.307665383], [4215951.833591679, 3537817.511375569], [4216459.641982099, 3533493.0451522577], [4223315.0552527625, 3531330.812040602], [4223568.9594479725, 3531330.812040602], [4225346.28881444, 3531979.481974099], [4233471.223061153, 3534790.3850192507]]], [[[4234740.744037202, 3488302.3731186558], [4231186.085304265, 3488302.3731186558], [4229662.660133006, 3492410.6160308016], [4231186.085304265, 3492843.0626531327], [4232963.414670734, 3493491.732586629], [4237533.690184509, 3495005.295764788], [4234740.744037202, 3488302.3731186558]]], [[[4229154.851742587, 3511654.490724536], [4222553.342667134, 3509492.257612881], [4220776.013300665, 3510789.597479874], [4217475.258762938, 3513168.053902695], [4227123.618180909, 3517492.520126006], [4230170.468523426, 3515978.9569478473], [4230678.276913846, 3513384.277213861], [4229154.851742587, 3511654.490724536]]], [[[4217729.162958148, 3502573.1116555827], [4215444.02520126, 3501491.995099755], [4210873.749687484, 3508411.1410570526], [4215190.12100605, 3512951.8305915296], [4213920.600030001, 3510140.9275463773], [4216459.641982099, 3504951.568078404], [4217221.354567728, 3503654.2282114103], [4217475.258762938, 3503221.781589079], [4217729.162958148, 3502573.1116555827]]]]}}, {"type": "Feature", "properties": {"id": "DEF08", "na": "Ostholstein", "AGS": "01055"}, "geometry": {"type": "MultiPolygon", "coordinates": [[[[4406379.979999, 3478139.8774938746], [4397493.333166658, 3477923.6541827093], [4393938.674433721, 3477923.6541827093], [4392161.345067253, 3482680.567028351], [4388352.782139107, 3482896.790339517], [4386067.644382219, 3482896.790339517], [4390130.1115055755, 3492626.839341967], [4392415.249262463, 3491978.1694084704], [4398001.141557078, 3490248.3829191457], [4400540.183509176, 3489383.489674484], [4401809.704485225, 3487221.256562828], [4403840.938046902, 3484194.1302065104], [4404602.650632531, 3482248.1204060204], [4406379.979999, 3478139.8774938746]]], [[[4376165.380769039, 3431868.088904445], [4374388.05140257, 3425597.612880644], [4359153.799689984, 3421273.146657333], [4356868.661933096, 3422570.4865243263], [4356106.949347467, 3423651.603080154], [4357376.470323516, 3425597.612880644], [4354837.428371418, 3430354.525726286], [4350521.057052853, 3431219.4189709486], [4356360.853542677, 3434678.9919495974], [4357884.278713936, 3440300.798039902], [4348235.919295965, 3441814.361218061], [4349251.536076804, 3445706.380819041], [4356106.949347467, 3446355.050752538], [4352552.29061453, 3452409.303465173], [4356360.853542677, 3458031.1095554777], [4365247.500375018, 3454139.0899544978], [4367786.542327116, 3456733.7696884843], [4368548.254912745, 3462788.02240112], [4367532.638131906, 3466680.0420021], [4380481.752087604, 3474464.08120406], [4382512.985649282, 3475545.197759888], [4387337.165358268, 3475328.9744487223], [4390637.9198959945, 3474896.527826391], [4394192.578628931, 3474680.304515226], [4390637.9198959945, 3471004.508225411], [4391145.728286414, 3466031.3720686035], [4391653.536676833, 3462571.7990899542], [4392161.345067253, 3457814.886244312], [4392415.249262463, 3455220.2065103254], [4389876.2073103655, 3453274.1967098354], [4385813.74018701, 3450463.293664683], [4383020.794039702, 3448301.060553028], [4375911.476573829, 3442895.4777738885], [4370579.488474423, 3438787.234861743], [4372610.722036102, 3432516.758837942], [4374388.05140257, 3432300.535526776], [4376165.380769039, 3431868.088904445]]]]}}, {"type": "Feature", "properties": {"id": "DEF09", "na": "Pinneberg", "AGS": "01056"}, "geometry": {"type": "Polygon", "coordinates": [[[4317513.511675583, 3394029.0094504724], [4309388.577428872, 3386244.9702485125], [4305833.918695934, 3391218.10640532], [4303040.972548627, 3383434.06720336], [4291361.379568978, 3389920.7665383266], [4287045.0082504125, 3400083.262163108], [4293392.613130657, 3401813.048652433], [4292123.092154607, 3405056.398319916], [4297962.888644433, 3408299.7479873993], [4299740.218010901, 3416083.7871893593], [4298470.697034852, 3419975.8067903398], [4304564.397719886, 3420624.476723836], [4305326.110305515, 3418462.2436121805], [4317005.703285164, 3405056.398319916], [4318529.128456423, 3401813.048652433], [4316751.799089954, 3396623.689184459], [4317513.511675583, 3394029.0094504724]]]}}, {"type": "Feature", "properties": {"id": "DEF0A", "na": "Pl\u00c3\u00b6n", "AGS": "01057"}, "geometry": {"type": "Polygon", "coordinates": [[[4367532.638131906, 3466680.0420021], [4368548.254912745, 3462788.02240112], [4367786.542327116, 3456733.7696884843], [4365247.500375018, 3454139.0899544978], [4356360.853542677, 3458031.1095554777], [4352552.29061453, 3452409.303465173], [4356106.949347467, 3446355.050752538], [4349251.536076804, 3445706.380819041], [4348235.919295965, 3441814.361218061], [4344427.356367818, 3441814.361218061], [4344173.452172609, 3444625.264263213], [4324622.829141457, 3439003.4581729085], [4322591.595579779, 3439219.6814840743], [4323353.308165409, 3446787.4973748685], [4328685.296264813, 3447003.7206860343], [4329447.008850442, 3458247.332866643], [4327415.775288764, 3459112.2261113054], [4328939.200460022, 3461058.2359117954], [4334271.188559428, 3462571.7990899542], [4335286.805340267, 3469274.7217360865], [4332239.95499775, 3471004.508225411], [4333255.571778589, 3473166.741337067], [4334525.092754638, 3475977.644382219], [4335032.901145057, 3476842.537626881], [4335032.901145057, 3477058.760938047], [4335794.613730687, 3478572.324116206], [4337318.038901945, 3479004.770738537], [4339857.080854042, 3479653.4406720335], [4344173.452172609, 3480518.333916696], [4365247.500375018, 3467977.3818690935], [4367532.638131906, 3466680.0420021]]]}}, {"type": "Feature", "properties": {"id": "DEF0B", "na": "Rendsburg-Eckernf\u00c3\u00b6rde", "AGS": "01058"}, "geometry": {"type": "Polygon", "coordinates": [[[4323099.403970199, 3503438.004900245], [4322845.499774989, 3500627.1018550927], [4322845.499774989, 3493707.955897795], [4320814.266213311, 3490464.6062303116], [4310150.290014501, 3485275.246762338], [4312181.523576179, 3482464.343717186], [4315736.182309115, 3483329.236961848], [4329193.104655232, 3486572.5866293316], [4334017.284364218, 3483113.0136506823], [4333255.571778589, 3482464.343717186], [4331986.05080254, 3480734.557227861], [4328685.296264813, 3473599.1879593977], [4323099.403970199, 3472085.624781239], [4324115.020751038, 3465815.1487574377], [4328939.200460022, 3461058.2359117954], [4327415.775288764, 3459112.2261113054], [4329447.008850442, 3458247.332866643], [4328685.296264813, 3447003.7206860343], [4323353.308165409, 3446787.4973748685], [4321575.97879894, 3448301.060553028], [4316243.990699535, 3443976.5943297166], [4317259.607480374, 3434895.2152607627], [4312181.523576179, 3433814.098704935], [4308119.056452823, 3438138.564928246], [4295169.942497125, 3438138.564928246], [4293646.517325866, 3442246.807840392], [4289837.954397719, 3443327.9243962197], [4275873.223661182, 3439868.351417571], [4276127.127856392, 3447003.7206860343], [4284505.966298315, 3451976.856842842], [4284759.870493525, 3460193.342667133], [4281459.115955798, 3464950.2555127754], [4282982.541127056, 3471220.731536577], [4292123.092154607, 3472518.07140357], [4292123.092154607, 3480518.333916696], [4299994.1222061105, 3487869.9264963246], [4301771.451572578, 3489599.7129856492], [4302533.164158208, 3490248.3829191457], [4303802.685134256, 3491329.499474974], [4312435.427771389, 3499113.538676934], [4316243.990699535, 3502356.8883444173], [4316497.894894745, 3502573.1116555827], [4317513.511675583, 3503438.004900245], [4320052.553627681, 3503654.2282114103], [4323099.403970199, 3503438.004900245]]]}}, {"type": "Feature", "properties": {"id": "DEF0C", "na": "Schleswig-Flensburg", "AGS": "01059"}, "geometry": {"type": "Polygon", "coordinates": [[[4283744.253712686, 3525276.5593279665], [4283998.157907896, 3524411.666083304], [4283998.157907896, 3524195.4427721384], [4279681.786589329, 3519438.529926496], [4285775.487274364, 3516411.4035701784], [4289076.24181209, 3518789.8599929996], [4288314.529226461, 3524195.4427721384], [4289330.1460073, 3524844.1127056354], [4290345.762788139, 3525709.005950297], [4290345.762788139, 3525925.229261463], [4292630.900545027, 3527438.792439622], [4293138.708935447, 3528087.4623731184], [4294408.229911495, 3528952.3556177807], [4294662.134106705, 3527222.5691284565], [4294916.038301915, 3526141.4525726284], [4296693.367668383, 3525276.5593279665], [4298216.792839642, 3524195.4427721384], [4298724.601230062, 3523979.219460973], [4309642.481624081, 3518141.190059503], [4312943.236161808, 3516195.180259013], [4315228.373918695, 3521384.539726986], [4318275.224261213, 3519222.3066153307], [4319798.649432471, 3515546.510325516], [4321322.07460373, 3511222.044102205], [4322083.787189359, 3509708.480924046], [4319290.841042052, 3507546.2478123903], [4323099.403970199, 3503438.004900245], [4320052.553627681, 3503654.2282114103], [4317513.511675583, 3503438.004900245], [4317513.511675583, 3506248.9079453973], [4317005.703285164, 3505600.2380119003], [4316751.799089954, 3505600.2380119003], [4305833.918695934, 3496951.305565278], [4303040.972548627, 3491761.9460973046], [4302279.259962998, 3490464.6062303116], [4297455.080254013, 3490032.1596079804], [4297201.176058803, 3489815.9362968146], [4294408.229911495, 3489599.7129856492], [4293392.613130657, 3489599.7129856492], [4291615.283764188, 3489383.489674484], [4294662.134106705, 3488734.819740987], [4299994.1222061105, 3487869.9264963246], [4292123.092154607, 3480518.333916696], [4292123.092154607, 3472518.07140357], [4282982.541127056, 3471220.731536577], [4281459.115955798, 3464950.2555127754], [4275873.223661182, 3463004.2457122854], [4272826.373318666, 3466896.2653132654], [4274095.894294715, 3468842.275113756], [4273080.277513876, 3471004.508225411], [4267494.385219261, 3470139.614980749], [4269525.618780939, 3475761.4210710535], [4277142.744637232, 3482464.343717186], [4276381.032051602, 3495005.295764788], [4272572.469123457, 3497167.528876444], [4270795.139756988, 3504951.568078404], [4260638.971948598, 3511005.8207910396], [4261654.5887294365, 3517060.073503675], [4264447.534876743, 3520519.646482324], [4263939.726486324, 3530033.472173609], [4272064.660733037, 3527438.792439622], [4272826.373318666, 3522898.1029051454], [4283744.253712686, 3525276.5593279665]]]}}, {"type": "Feature", "properties": {"id": "DEF0D", "na": "Segeberg", "AGS": "01060"}, "geometry": {"type": "Polygon", "coordinates": [[[4348235.919295965, 3441814.361218061], [4357884.278713936, 3440300.798039902], [4356360.853542677, 3434678.9919495974], [4350521.057052853, 3431219.4189709486], [4354837.428371418, 3430354.525726286], [4357376.470323516, 3425597.612880644], [4356106.949347467, 3423651.603080154], [4322591.595579779, 3404623.9516975847], [4325892.3501175055, 3400299.4854742736], [4325638.4459222965, 3396839.9124956247], [4317513.511675583, 3394029.0094504724], [4316751.799089954, 3396623.689184459], [4318529.128456423, 3401813.048652433], [4317005.703285164, 3405056.398319916], [4305326.110305515, 3418462.2436121805], [4304564.397719886, 3420624.476723836], [4306341.727086354, 3430354.525726286], [4312181.523576179, 3433814.098704935], [4317259.607480374, 3434895.2152607627], [4324622.829141457, 3439003.4581729085], [4344173.452172609, 3444625.264263213], [4344427.356367818, 3441814.361218061], [4348235.919295965, 3441814.361218061]]]}}, {"type": "Feature", "properties": {"id": "DEF0E", "na": "Steinburg", "AGS": "01061"}, "geometry": {"type": "Polygon", "coordinates": [[[4312181.523576179, 3433814.098704935], [4306341.727086354, 3430354.525726286], [4304564.397719886, 3420624.476723836], [4298470.697034852, 3419975.8067903398], [4299740.218010901, 3416083.7871893593], [4297962.888644433, 3408299.7479873993], [4292123.092154607, 3405056.398319916], [4293392.613130657, 3401813.048652433], [4287045.0082504125, 3400083.262163108], [4274349.7984899245, 3417597.350367518], [4268256.09780489, 3419543.360168008], [4269017.810390519, 3425381.389569478], [4273334.181709086, 3430354.525726286], [4275873.223661182, 3439868.351417571], [4289837.954397719, 3443327.9243962197], [4293646.517325866, 3442246.807840392], [4295169.942497125, 3438138.564928246], [4308119.056452823, 3438138.564928246], [4312181.523576179, 3433814.098704935]]]}}, {"type": "Feature", "properties": {"id": "DEF0F", "na": "Stormarn", "AGS": "01062"}, "geometry": {"type": "Polygon", "coordinates": [[[4359153.799689984, 3421273.146657333], [4357630.374518726, 3413489.107455373], [4359407.703885194, 3410894.427721386], [4350267.152857643, 3405272.621631081], [4348235.919295965, 3399434.5922296112], [4347728.110905545, 3396407.4658732936], [4354583.524176208, 3389055.8732936643], [4348743.727686385, 3388407.2033601683], [4336810.230511526, 3376514.921246062], [4330970.434021701, 3381920.5040252013], [4330970.434021701, 3385380.07700385], [4334271.188559428, 3386244.9702485125], [4335794.613730687, 3391866.7763388166], [4330208.721436072, 3397056.1358067906], [4333509.475973799, 3401596.825341267], [4325892.3501175055, 3400299.4854742736], [4322591.595579779, 3404623.9516975847], [4356106.949347467, 3423651.603080154], [4356868.661933096, 3422570.4865243263], [4359153.799689984, 3421273.146657333]]]}}, {"type": "Feature", "properties": {"id": "DEG01", "na": "Erfurt, Kreisfreie Stadt", "AGS": "16051"}, "geometry": {"type": "Polygon", "coordinates": [[[4403079.2254612725, 3101478.869443472], [4399016.758337917, 3089586.5873293662], [4386829.356967848, 3087424.354217711], [4388352.782139107, 3091965.043752188], [4381751.273063653, 3095208.393419671], [4381497.368868443, 3102127.5393769685], [4395716.00380019, 3108181.792089605], [4399778.470923546, 3100397.7528876443], [4403079.2254612725, 3101478.869443472]]]}}, {"type": "Feature", "properties": {"id": "DEG02", "na": "Gera, Kreisfreie Stadt", "AGS": "16052"}, "geometry": {"type": "Polygon", "coordinates": [[[4472902.879143957, 3096505.7332866644], [4473410.687534377, 3093911.053552678], [4470871.645582279, 3093478.606930346], [4471379.453972698, 3080937.654882744], [4461731.094554728, 3083964.7812390616], [4464524.040702035, 3093046.1603080155], [4463000.615530776, 3094992.1701085055], [4463000.615530776, 3097370.626531326], [4470871.645582279, 3096938.1799089955], [4472902.879143957, 3096505.7332866644]]]}}, {"type": "Feature", "properties": {"id": "DEG03", "na": "Jena, Kreisfreie Stadt", "AGS": "16053"}, "geometry": {"type": "Polygon", "coordinates": [[[4426946.219810991, 3089370.364018201], [4426692.315615781, 3095857.063353168], [4429739.165958298, 3098667.96639832], [4430500.878543927, 3096938.1799089955], [4438118.00440022, 3095424.616730836], [4437864.10020501, 3087208.1309065456], [4430754.782739136, 3083964.7812390616], [4428469.644982249, 3084613.4511725586], [4431008.686934346, 3087424.354217711], [4426946.219810991, 3089370.364018201]]]}}, {"type": "Feature", "properties": {"id": "DEG04", "na": "Suhl, Kreisfreie Stadt", "AGS": "16054"}, "geometry": {"type": "Polygon", "coordinates": [[[4379466.135306765, 3052396.17780889], [4375149.7639882, 3056071.9740987048], [4368548.254912745, 3050233.944697235], [4362200.650032502, 3052828.6244312217], [4360169.416470824, 3055639.527476374], [4366517.021351067, 3059531.547077354], [4370071.680084004, 3057369.3139656982], [4370579.488474423, 3061261.333566678], [4372864.626231311, 3061477.556877844], [4379466.135306765, 3052396.17780889]]]}}, {"type": "Feature", "properties": {"id": "DEG05", "na": "Weimar, Kreisfreie Stadt", "AGS": "16055"}, "geometry": {"type": "Polygon", "coordinates": [[[4419582.998149907, 3095640.840042002], [4411965.872293615, 3090451.4805740286], [4408157.309365468, 3102127.5393769685], [4410188.542927146, 3102343.7626881343], [4417297.860393019, 3101911.316065803], [4419582.998149907, 3095640.840042002]]]}}, {"type": "Feature", "properties": {"id": "DEG06", "na": "Eichsfeld", "AGS": "16061"}, "geometry": {"type": "Polygon", "coordinates": [[[4354837.428371418, 3162886.289814491], [4356614.757737887, 3154021.1340567027], [4354329.619980999, 3145155.9782989146], [4357376.470323516, 3139966.6188309416], [4354583.524176208, 3136939.492474624], [4348235.919295965, 3136939.492474624], [4343157.835391769, 3126776.9968498424], [4334017.284364218, 3123101.2005600277], [4335540.709535477, 3120074.07420371], [4325638.4459222965, 3124182.3171158554], [4317513.511675583, 3133912.366118306], [4315990.086504325, 3140399.0654532723], [4324368.924946247, 3147318.2114105704], [4331478.24241212, 3146453.3181659086], [4346458.589929497, 3160724.056702835], [4346712.494124706, 3164183.629681484], [4354837.428371418, 3162886.289814491]]]}}, {"type": "Feature", "properties": {"id": "DEG07", "na": "Nordhausen", "AGS": "16062"}, "geometry": {"type": "Polygon", "coordinates": [[[4384544.21921096, 3167643.202660133], [4386067.644382219, 3166129.639481974], [4382259.081454072, 3163751.183059153], [4385813.74018701, 3158561.823591179], [4389114.494724736, 3146669.541477074], [4357376.470323516, 3139966.6188309416], [4354329.619980999, 3145155.9782989146], [4356614.757737887, 3154021.1340567027], [4354837.428371418, 3162886.289814491], [4359661.608080404, 3160724.056702835], [4367786.542327116, 3170021.659082954], [4369563.871693585, 3170454.1057052854], [4375403.668183409, 3170454.1057052854], [4384544.21921096, 3167643.202660133]]]}}, {"type": "Feature", "properties": {"id": "DEG09", "na": "Unstrut-Hainich-Kreis", "AGS": "16064"}, "geometry": {"type": "Polygon", "coordinates": [[[4354583.524176208, 3136939.492474624], [4357630.374518726, 3132831.249562478], [4363470.171008551, 3134344.812740637], [4368548.254912745, 3129587.8998949947], [4370579.488474423, 3123101.2005600277], [4385559.8359918, 3122020.0840042], [4385305.93179659, 3115533.384669233], [4382766.889844492, 3110127.8018900948], [4374388.05140257, 3110776.471823591], [4370325.584279214, 3109911.578578929], [4370833.392669633, 3104722.2191109555], [4364231.8835941795, 3103208.6559327967], [4354837.428371418, 3108181.792089605], [4351536.6738336915, 3104289.7724886243], [4344427.356367818, 3114452.2681134054], [4335794.613730687, 3114884.714735737], [4337571.943097155, 3119425.4042702136], [4335540.709535477, 3120074.07420371], [4334017.284364218, 3123101.2005600277], [4343157.835391769, 3126776.9968498424], [4348235.919295965, 3136939.492474624], [4354583.524176208, 3136939.492474624]]]}}, {"type": "Feature", "properties": {"id": "DEG0A", "na": "Kyffh\u00c3\u00a4userkreis", "AGS": "16065"}, "geometry": {"type": "Polygon", "coordinates": [[[4420598.614930746, 3137588.1624081205], [4423899.369468473, 3132615.0262513123], [4417805.668783439, 3126993.2201610077], [4405872.17160858, 3126344.5502275117], [4401301.896094805, 3127858.11340567], [4402063.608680434, 3130020.346517326], [4398001.141557078, 3134128.5894294716], [4395462.09960498, 3135209.7059852993], [4390891.824091204, 3123749.8704935247], [4385559.8359918, 3122020.0840042], [4370579.488474423, 3123101.2005600277], [4368548.254912745, 3129587.8998949947], [4363470.171008551, 3134344.812740637], [4357630.374518726, 3132831.249562478], [4354583.524176208, 3136939.492474624], [4357376.470323516, 3139966.6188309416], [4389114.494724736, 3146669.541477074], [4401301.896094805, 3144074.861743087], [4412981.489074454, 3145155.9782989146], [4420598.614930746, 3137588.1624081205]]]}}, {"type": "Feature", "properties": {"id": "DEG0B", "na": "Schmalkalden-Meiningen", "AGS": "16066"}, "geometry": {"type": "Polygon", "coordinates": [[[4374134.147207361, 3067748.0329016447], [4372864.626231311, 3061477.556877844], [4370579.488474423, 3061261.333566678], [4370071.680084004, 3057369.3139656982], [4366517.021351067, 3059531.547077354], [4360169.416470824, 3055639.527476374], [4362200.650032502, 3052828.6244312217], [4360169.416470824, 3042882.3521176055], [4361185.033251663, 3036611.876093805], [4357122.566128306, 3037260.5460273013], [4353060.09900495, 3032287.409870493], [4348997.631881594, 3031638.7399369967], [4344427.356367818, 3042449.905495275], [4329954.817240862, 3049801.4980749036], [4323861.116555828, 3045044.5852292613], [4323607.212360618, 3055423.3041652082], [4326400.158507925, 3058450.4305215264], [4336048.517925896, 3056720.6440322017], [4333763.380169008, 3062342.4501225064], [4335286.805340267, 3074018.5089254463], [4348235.919295965, 3075099.625481274], [4350013.248662433, 3082234.9947497374], [4355853.045152257, 3080505.2082604133], [4358899.895494775, 3079640.315015751], [4362200.650032502, 3069477.8193909694], [4374134.147207361, 3067748.0329016447]]]}}, {"type": "Feature", "properties": {"id": "DEG0C", "na": "Gotha", "AGS": "16067"}, "geometry": {"type": "Polygon", "coordinates": [[[4382766.889844492, 3110127.8018900948], [4381497.368868443, 3102127.5393769685], [4381751.273063653, 3095208.393419671], [4388352.782139107, 3091965.043752188], [4386829.356967848, 3087424.354217711], [4379466.135306765, 3081586.324816241], [4381497.368868443, 3080505.2082604133], [4378196.614330716, 3073369.8389919493], [4375149.7639882, 3072937.3923696186], [4374134.147207361, 3067748.0329016447], [4362200.650032502, 3069477.8193909694], [4358899.895494775, 3079640.315015751], [4355853.045152257, 3080505.2082604133], [4350013.248662433, 3082234.9947497374], [4349251.536076804, 3083748.5579278963], [4351536.6738336915, 3088289.247462373], [4354837.428371418, 3089154.1407070355], [4357630.374518726, 3095208.393419671], [4355853.045152257, 3098019.296464823], [4364231.8835941795, 3103208.6559327967], [4370833.392669633, 3104722.2191109555], [4370325.584279214, 3109911.578578929], [4374388.05140257, 3110776.471823591], [4382766.889844492, 3110127.8018900948]]]}}, {"type": "Feature", "properties": {"id": "DEG0D", "na": "S\u00c3\u00b6mmerda", "AGS": "16068"}, "geometry": {"type": "Polygon", "coordinates": [[[4417805.668783439, 3126993.2201610077], [4416536.14780739, 3125263.4336716835], [4418313.477173858, 3122236.3073153654], [4423645.465273264, 3121155.1907595377], [4424914.986249313, 3118128.06440322], [4422629.848492425, 3115965.8312915647], [4424914.986249313, 3111425.141757088], [4404856.554827741, 3110776.471823591], [4406379.979999, 3102992.432621631], [4403079.2254612725, 3101478.869443472], [4399778.470923546, 3100397.7528876443], [4395716.00380019, 3108181.792089605], [4381497.368868443, 3102127.5393769685], [4382766.889844492, 3110127.8018900948], [4385305.93179659, 3115533.384669233], [4385559.8359918, 3122020.0840042], [4390891.824091204, 3123749.8704935247], [4395462.09960498, 3135209.7059852993], [4398001.141557078, 3134128.5894294716], [4402063.608680434, 3130020.346517326], [4401301.896094805, 3127858.11340567], [4405872.17160858, 3126344.5502275117], [4417805.668783439, 3126993.2201610077]]]}}, {"type": "Feature", "properties": {"id": "DEG0E", "na": "Hildburghausen", "AGS": "16069"}, "geometry": {"type": "Polygon", "coordinates": [[[4379466.135306765, 3052396.17780889], [4382005.177258863, 3050450.1680084], [4384290.315015751, 3055639.527476374], [4387844.973748688, 3048936.6048302418], [4389622.303115156, 3049369.0514525725], [4391399.632481623, 3046774.371718586], [4390130.1115055755, 3043531.0220511025], [4391145.728286414, 3041368.788939447], [4394700.387019351, 3039422.779138957], [4387844.973748688, 3034017.196359818], [4389114.494724736, 3032503.633181659], [4388352.782139107, 3030990.0700035], [4384036.410820541, 3031638.7399369967], [4371849.009450473, 3028179.166958348], [4371849.009450473, 3023422.2541127056], [4381751.273063653, 3017151.7780889045], [4373118.530426521, 3013259.758487924], [4372102.913645682, 3010448.855442772], [4364485.7877893895, 3013043.5351767587], [4363216.266813341, 3017800.448022401], [4363724.07520376, 3024719.5939796986], [4356106.949347467, 3027098.05040252], [4353060.09900495, 3032287.409870493], [4357122.566128306, 3037260.5460273013], [4361185.033251663, 3036611.876093805], [4360169.416470824, 3042882.3521176055], [4362200.650032502, 3052828.6244312217], [4368548.254912745, 3050233.944697235], [4375149.7639882, 3056071.9740987048], [4379466.135306765, 3052396.17780889]]]}}, {"type": "Feature", "properties": {"id": "DEG0F", "na": "Ilm-Kreis", "AGS": "16070"}, "geometry": {"type": "Polygon", "coordinates": [[[4407141.692584629, 3077694.305215261], [4403840.938046902, 3074018.5089254463], [4405110.459022951, 3070126.4893244663], [4395462.09960498, 3066883.139656983], [4396223.812190609, 3058017.9838991947], [4398001.141557078, 3055855.7507875394], [4396477.716385819, 3050666.391319566], [4389622.303115156, 3049369.0514525725], [4387844.973748688, 3048936.6048302418], [4384290.315015751, 3055639.527476374], [4382005.177258863, 3050450.1680084], [4379466.135306765, 3052396.17780889], [4372864.626231311, 3061477.556877844], [4374134.147207361, 3067748.0329016447], [4375149.7639882, 3072937.3923696186], [4378196.614330716, 3073369.8389919493], [4381497.368868443, 3080505.2082604133], [4379466.135306765, 3081586.324816241], [4386829.356967848, 3087424.354217711], [4399016.758337917, 3089586.5873293662], [4399270.662533127, 3087856.800840042], [4403840.938046902, 3083748.5579278963], [4402571.4170708535, 3080288.9849492474], [4407141.692584629, 3077694.305215261]]]}}, {"type": "Feature", "properties": {"id": "DEG0G", "na": "Weimarer Land", "AGS": "16071"}, "geometry": {"type": "Polygon", "coordinates": [[[4439895.333766688, 3109911.578578929], [4438371.90859543, 3104073.5491774585], [4429739.165958298, 3098667.96639832], [4426692.315615781, 3095857.063353168], [4426946.219810991, 3089370.364018201], [4422375.944297215, 3084613.4511725586], [4421360.327516376, 3078342.9751487575], [4412727.584879244, 3078559.1984599233], [4409172.926146307, 3080937.654882744], [4407141.692584629, 3077694.305215261], [4402571.4170708535, 3080288.9849492474], [4403840.938046902, 3083748.5579278963], [4399270.662533127, 3087856.800840042], [4399016.758337917, 3089586.5873293662], [4403079.2254612725, 3101478.869443472], [4406379.979999, 3102992.432621631], [4404856.554827741, 3110776.471823591], [4424914.986249313, 3111425.141757088], [4433039.920496024, 3112722.4816240813], [4439895.333766688, 3109911.578578929]], [[4419582.998149907, 3095640.840042002], [4417297.860393019, 3101911.316065803], [4410188.542927146, 3102343.7626881343], [4408157.309365468, 3102127.5393769685], [4411965.872293615, 3090451.4805740286], [4419582.998149907, 3095640.840042002]]]}}, {"type": "Feature", "properties": {"id": "DEG0H", "na": "Sonneberg", "AGS": "16072"}, "geometry": {"type": "Polygon", "coordinates": [[[4410950.255512776, 3041585.0122506125], [4409426.830341517, 3040720.11900595], [4412473.680684034, 3028395.3902695132], [4410696.351317566, 3018881.5645782286], [4405872.17160858, 3018449.117955898], [4402317.512875644, 3020395.127756388], [4401809.704485225, 3022989.8074903744], [4403587.033851692, 3024935.8172908644], [4400286.279313966, 3028827.836891845], [4391145.728286414, 3026665.603780189], [4388352.782139107, 3030990.0700035], [4389114.494724736, 3032503.633181659], [4387844.973748688, 3034017.196359818], [4394700.387019351, 3039422.779138957], [4391145.728286414, 3041368.788939447], [4390130.1115055755, 3043531.0220511025], [4391399.632481623, 3046774.371718586], [4403079.2254612725, 3047639.264963248], [4403333.1296564825, 3043314.798739937], [4411965.872293615, 3043314.798739937], [4410950.255512776, 3041585.0122506125]]]}}, {"type": "Feature", "properties": {"id": "DEA44", "na": "H\u00c3\u00b6xter", "AGS": "05762"}, "geometry": {"type": "Polygon", "coordinates": [[[4274349.7984899245, 3194022.446622331], [4283744.253712686, 3194887.339866993], [4282220.828541427, 3187535.747287364], [4277904.457222861, 3181697.7178858942], [4277650.553027651, 3171318.9989499478], [4280697.403370168, 3170886.552327616], [4282220.828541427, 3171318.9989499478], [4275111.5110755535, 3167426.9793489673], [4277650.553027651, 3164616.0763038155], [4262162.3971198555, 3148399.3279663986], [4257846.02580129, 3148615.551277564], [4256830.409020451, 3150777.7843892192], [4257846.02580129, 3154237.3573678685], [4253275.750287514, 3156183.3671683585], [4249467.187359368, 3155534.6972348616], [4245150.816040802, 3158345.600280014], [4252767.941897094, 3163102.513125656], [4250228.899944997, 3168291.8725936296], [4250228.899944997, 3176940.805040252], [4251752.325116256, 3178021.92159608], [4249213.283164158, 3187103.300665033], [4248705.4747737385, 3192292.6601330065], [4261400.684534227, 3200292.9226461323], [4261400.684534227, 3195752.2331116553], [4274349.7984899245, 3194022.446622331]]]}}, {"type": "Feature", "properties": {"id": "DEA45", "na": "Lippe", "AGS": "05766"}, "geometry": {"type": "Polygon", "coordinates": [[[4263178.013900695, 3221266.5838291915], [4265209.247462373, 3206347.1753587676], [4271049.043952198, 3207212.06860343], [4271049.043952198, 3202671.3790689535], [4273334.181709086, 3201590.2625131253], [4275873.223661182, 3198563.1361568077], [4274349.7984899245, 3194022.446622331], [4261400.684534227, 3195752.2331116553], [4261400.684534227, 3200292.9226461323], [4248705.4747737385, 3192292.6601330065], [4249213.283164158, 3187103.300665033], [4237533.690184509, 3188184.4172208607], [4234740.744037202, 3195103.563178159], [4230424.372718636, 3201374.03920196], [4225092.38461923, 3202887.6023801193], [4228139.234961748, 3206347.1753587676], [4228647.043352168, 3217590.787539377], [4235502.4566228315, 3224293.710185509], [4245150.816040802, 3222996.370318516], [4247689.8579929, 3230996.6328316415], [4251752.325116256, 3232077.749387469], [4252260.133506675, 3231861.526076304], [4262416.3013150655, 3225374.826741337], [4263431.918095904, 3223645.040252012], [4261654.5887294365, 3221266.5838291915], [4263178.013900695, 3221266.5838291915]]]}}, {"type": "Feature", "properties": {"id": "DEA46", "na": "Minden-L\u00c3\u00bcbbecke", "AGS": "05770"}, "geometry": {"type": "Polygon", "coordinates": [[[4232963.414670734, 3266457.255862793], [4233471.223061153, 3254348.750437522], [4248705.4747737385, 3255213.643682184], [4256576.504825241, 3266024.8092404623], [4261908.4929246465, 3264295.0227511376], [4260385.067753388, 3258889.4399719983], [4261400.684534227, 3256294.760238012], [4250228.899944997, 3241591.5750787538], [4257846.02580129, 3236402.2156107808], [4255814.792239612, 3230780.409520476], [4251752.325116256, 3232077.749387469], [4247689.8579929, 3230996.6328316415], [4237533.690184509, 3228834.399719986], [4237787.594379719, 3233807.535876794], [4232963.414670734, 3238564.448722436], [4216713.546177309, 3240078.011900595], [4216205.737786889, 3240942.9051452572], [4214936.21681084, 3251321.6240812037], [4206303.474173709, 3256510.9835491776], [4205287.85739287, 3262132.789639482], [4214174.504225211, 3261051.673083654], [4219760.396519826, 3268403.265663283], [4230932.181109056, 3268403.265663283], [4232963.414670734, 3266457.255862793]]]}}, {"type": "Feature", "properties": {"id": "DEA47", "na": "Paderborn", "AGS": "05774"}, "geometry": {"type": "Polygon", "coordinates": [[[4234740.744037202, 3195103.563178159], [4237533.690184509, 3188184.4172208607], [4249213.283164158, 3187103.300665033], [4251752.325116256, 3178021.92159608], [4250228.899944997, 3176940.805040252], [4250228.899944997, 3168291.8725936296], [4252767.941897094, 3163102.513125656], [4245150.816040802, 3158345.600280014], [4244135.199259963, 3159859.163458173], [4238803.211160557, 3159426.7168358415], [4240072.732136607, 3154453.580679034], [4235248.552427622, 3149264.2212110604], [4227631.426571328, 3152940.017500875], [4220014.300715036, 3151858.900945047], [4215190.12100605, 3162453.8431921597], [4223061.151057553, 3168075.649282464], [4222299.438471924, 3173265.0087504378], [4215951.833591679, 3175859.6884844243], [4215190.12100605, 3180184.1547077354], [4210619.8454922745, 3179967.93139657], [4211635.462273113, 3184508.6209310465], [4220014.300715036, 3192292.6601330065], [4228139.234961748, 3195968.456422821], [4234740.744037202, 3195103.563178159]]]}}, {"type": "Feature", "properties": {"id": "DEA51", "na": "Bochum, Kreisfreie Stadt", "AGS": "05911"}, "geometry": {"type": "Polygon", "coordinates": [[[4134702.4911245564, 3160291.610080504], [4136733.7246862343, 3155750.9205460274], [4129878.311415571, 3148399.3279663986], [4121753.3771688584, 3150129.1144557227], [4119976.04780239, 3156183.3671683585], [4122515.0897544874, 3158994.270213511], [4133179.0659532975, 3161372.7266363315], [4134702.4911245564, 3160291.610080504]]]}}, {"type": "Feature", "properties": {"id": "DEA52", "na": "Dortmund, Kreisfreie Stadt", "AGS": "05913"}, "geometry": {"type": "Polygon", "coordinates": [[[4147651.605080254, 3148183.1046552327], [4144604.7547377367, 3148183.1046552327], [4139018.862443122, 3155318.473923696], [4136733.7246862343, 3155750.9205460274], [4134702.4911245564, 3160291.610080504], [4138003.245662283, 3160724.056702835], [4136479.8204910243, 3166345.8627931396], [4142065.712785639, 3168508.0959047955], [4142573.521176059, 3168075.649282464], [4153999.209960498, 3166345.8627931396], [4156792.156107805, 3162021.3965698285], [4157046.060303015, 3159642.9401470073], [4147651.605080254, 3148183.1046552327]]]}}, {"type": "Feature", "properties": {"id": "DEA53", "na": "Hagen, Kreisfreie Stadt", "AGS": "05914"}, "geometry": {"type": "Polygon", "coordinates": [[[4153237.497374869, 3144939.7549877493], [4152475.784789239, 3134344.812740637], [4147651.605080254, 3131101.4630731535], [4146889.8924946245, 3136939.492474624], [4141557.90439522, 3135209.7059852993], [4138257.149857493, 3140182.842142107], [4140542.287614381, 3146237.0948547428], [4144604.7547377367, 3148183.1046552327], [4147651.605080254, 3148183.1046552327], [4147397.7008850444, 3147750.6580329016], [4153237.497374869, 3144939.7549877493]]]}}, {"type": "Feature", "properties": {"id": "DEA54", "na": "Hamm, Kreisfreie Stadt", "AGS": "05915"}, "geometry": {"type": "Polygon", "coordinates": [[[4178881.8210910545, 3178670.591529576], [4182436.479823991, 3175643.4651732584], [4176596.6833341666, 3166994.532726636], [4170502.9826491326, 3165264.7462373115], [4169487.365868293, 3170021.659082954], [4160854.6232311614, 3169589.212460623], [4160092.9106455324, 3174994.795239762], [4163901.4735736786, 3176292.1351067554], [4162124.1442072103, 3180400.3780189008], [4164663.186159308, 3183211.281064053], [4171518.5994299715, 3182130.1645082254], [4178881.8210910545, 31786
[truncated: 21,081 more chars]
