# Supplementary material
Source: publisher site journal article supplement (https://fesmj.pensoft.net/article/download/suppl/6072903/)
Supplement: Supplementary file 1 [file  › Graph.txt]

<?xml version='1.0' encoding='utf-8'?>
<graphml xmlns="http://graphml.graphdrawing.org/xmlns" xmlns:xsi="http://www.w3.org/2001/XMLSchema-instance" xsi:schemaLocation="http://graphml.graphdrawing.org/xmlns http://graphml.graphdrawing.org/xmlns/1.0/graphml.xsd"><key id="d8" for="edge" attr.name="weight" attr.type="double"/>
<key id="d7" for="edge" attr.name="weight" attr.type="float"/>
<key id="d6" for="node" attr.name="received" attr.type="double"/>
<key id="d5" for="node" attr.name="received" attr.type="float"/>
<key id="d4" for="node" attr.name="output" attr.type="double"/>
<key id="d3" for="node" attr.name="ags" attr.type="string"/>
<key id="d2" for="node" attr.name="actor" attr.type="string"/>
<key id="d1" for="node" attr.name="location" attr.type="string"/>
<key id="d0" for="node" attr.name="product" attr.type="string"/>
<graph edgedefault="directed"><node id="1">
  <data key="d0">Eggs</data>
  <data key="d1">Flensburg; Stadt</data>
  <data key="d2">Producer</data>
  <data key="d3">1001</data>
  <data key="d4">28.69538249531581</data>
</node>
<node id="2">
  <data key="d0">Eggs</data>
  <data key="d1">Flensburg; Stadt</data>
  <data key="d2">Consumer</data>
  <data key="d3">1001</data>
  <data key="d5">778.40345380852</data>
</node>
<node id="3">
  <data key="d0">Eggs</data>
  <data key="d1">Flensburg; Stadt</data>
  <data key="d2">Wholesale</data>
  <data key="d3">1001</data>
  <data key="d6">128.4365698784058</data>
  <data key="d4">128.4365698784058</data>
</node>
<node id="4">
  <data key="d0">Eggs</data>
  <data key="d1">Flensburg; Stadt</data>
  <data key="d2">Warehouse_AldiNord</data>
  <data key="d3">1001</data>
  <data key="d6">0.0</data>
  <data key="d4">0.0</data>
</node>
<node id="5">
  <data key="d0">Eggs</data>
  <data key="d1">Flensburg; Stadt</data>
  <data key="d2">Store_AldiNord</data>
  <data key="d3">1001</data>
  <data key="d6">107.79691771004435</data>
  <data key="d4">107.79691771004435</data>
</node>
<node id="6">
  <data key="d0">Eggs</data>
  <data key="d1">Flensburg; Stadt</data>
  <data key="d2">Warehouse_AldiSued</data>
  <data key="d3">1001</data>
  <data key="d6">0.0</data>
  <data key="d4">0.0</data>
</node>
<node id="7">
  <data key="d0">Eggs</data>
  <data key="d1">Flensburg; Stadt</data>
  <data key="d2">Store_AldiSued</data>
  <data key="d3">1001</data>
  <data key="d6">0.0</data>
  <data key="d4">0.0</data>
</node>
<node id="8">
  <data key="d0">Eggs</data>
  <data key="d1">Flensburg; Stadt</data>
  <data key="d2">Warehouse_Alnatura</data>
  <data key="d3">1001</data>
  <data key="d6">0.0</data>
  <data key="d4">0.0</data>
</node>
<node id="9">
  <data key="d0">Eggs</data>
  <data key="d1">Flensburg; Stadt</data>
  <data key="d2">Store_Alnatura</data>
  <data key="d3">1001</data>
  <data key="d6">0.0</data>
  <data key="d4">0.0</data>
</node>
<node id="10">
  <data key="d0">Eggs</data>
  <data key="d1">Flensburg; Stadt</data>
  <data key="d2">Warehouse_BartelsLangness</data>
  <data key="d3">1001</data>
  <data key="d6">0.0</data>
  <data key="d4">0.0</data>
</node>
<node id="11">
  <data key="d0">Eggs</data>
  <data key="d1">Flensburg; Stadt</data>
  <data key="d2">Store_BartelsLangness</data>
  <data key="d3">1001</data>
  <data key="d6">32.18166499510248</data>
  <data key="d4">32.18166499510248</data>
</node>
<node id="12">
  <data key="d0">Eggs</data>
  <data key="d1">Flensburg; Stadt</data>
  <data key="d2">Warehouse_Buenting</data>
  <data key="d3">1001</data>
  <data key="d6">0.0</data>
  <data key="d4">0.0</data>
</node>
<node id="13">
  <data key="d0">Eggs</data>
  <data key="d1">Flensburg; Stadt</data>
  <data key="d2">Store_Buenting</data>
  <data key="d3">1001</data>
  <data key="d6">0.0</data>
  <data key="d4">0.0</data>
</node>
<node id="14">
  <data key="d0">Eggs</data>
  <data key="d1">Flensburg; Stadt</data>
  <data key="d2">Warehouse_Coop</data>
  <data key="d3">1001</data>
  <data key="d6">0.0</data>
  <data key="d4">0.0</data>
</node>
<node id="15">
  <data key="d0">Eggs</data>
  <data key="d1">Flensburg; Stadt</data>
  <data key="d2">Store_Coop</data>
  <data key="d3">1001</data>
  <data key="d6">153.62081025741855</data>
  <data key="d4">153.62081025741855</data>
</node>
<node id="16">
  <data key="d0">Eggs</data>
  <data key="d1">Flensburg; Stadt</data>
  <data key="d2">Warehouse_Dennree</data>
  <data key="d3">1001</data>
  <data key="d6">0.0</data>
  <data key="d4">0.0</data>
</node>
<node id="17">
  <data key="d0">Eggs</data>
  <data key="d1">Flensburg; Stadt</data>
  <data key="d2">Store_Dennree</data>
  <data key="d3">1001</data>
  <data key="d6">8.074566307647997</data>
  <data key="d4">8.074566307647997</data>
</node>
<node id="18">
  <data key="d0">Eggs</data>
  <data key="d1">Flensburg; Stadt</data>
  <data key="d2">Warehouse_EdekaHessenring</data>
  <data key="d3">1001</data>
  <data key="d6">0.0</data>
  <data key="d4">0.0</data>
</node>
<node id="19">
  <data key="d0">Eggs</data>
  <data key="d1">Flensburg; Stadt</data>
  <data key="d2">Store_EdekaHessenring</data>
  <data key="d3">1001</data>
  <data key="d6">0.0</data>
  <data key="d4">0.0</data>
</node>
<node id="20">
  <data key="d0">Eggs</data>
  <data key="d1">Flensburg; Stadt</data>
  <data key="d2">Warehouse_EdekaMindenHannover</data>
  <data key="d3">1001</data>
  <data key="d6">0.0</data>
  <data key="d4">0.0</data>
</node>
<node id="21">
  <data key="d0">Eggs</data>
  <data key="d1">Flensburg; Stadt</data>
  <data key="d2">Store_EdekaMindenHannover</data>
  <data key="d3">1001</data>
  <data key="d6">0.0</data>
  <data key="d4">0.0</data>
</node>
<node id="22">
  <data key="d0">Eggs</data>
  <data key="d1">Flensburg; Stadt</data>
  <data key="d2">Warehouse_EdekaNord</data>
  <data key="d3">1001</data>
  <data key="d6">0.0</data>
  <data key="d4">0.0</data>
</node>
<node id="23">
  <data key="d0">Eggs</data>
  <data key="d1">Flensburg; Stadt</data>
  <data key="d2">Store_EdekaNord</data>
  <data key="d3">1001</data>
  <data key="d6">72.84599712206621</data>
  <data key="d4">72.84599712206621</data>
</node>
<node id="24">
  <data key="d0">Eggs</data>
  <data key="d1">Flensburg; Stadt</data>
  <data key="d2">Warehouse_EdekaNordbayern</data>
  <data key="d3">1001</data>
  <data key="d6">0.0</data>
  <data key="d4">0.0</data>
</node>
<node id="25">
  <data key="d0">Eggs</data>
  <data key="d1">Flensburg; Stadt</data>
  <data key="d2">Store_EdekaNordbayern</data>
  <data key="d3">1001</data>
  <data key="d6">0.0</data>
  <data key="d4">0.0</data>
</node>
<node id="26">
  <data key="d0">Eggs</data>
  <data key="d1">Flensburg; Stadt</data>
  <data key="d2">Warehouse_EdekaRheinRuhr</data>
  <data key="d3">1001</data>
  <data key="d6">0.0</data>
  <data key="d4">0.0</data>
</node>
<node id="27">
  <data key="d0">Eggs</data>
  <data key="d1">Flensburg; Stadt</data>
  <data key="d2">Store_EdekaRheinRuhr</data>
  <data key="d3">1001</data>
  <data key="d6">0.0</data>
  <data key="d4">0.0</data>
</node>
<node id="28">
  <data key="d0">Eggs</data>
  <data key="d1">Flensburg; Stadt</data>
  <data key="d2">Warehouse_EdekaSuedbayern</data>
  <data key="d3">1001</data>
  <data key="d6">0.0</data>
  <data key="d4">0.0</data>
</node>
<node id="29">
  <data key="d0">Eggs</data>
  <data key="d1">Flensburg; Stadt</data>
  <data key="d2">Store_EdekaSuedbayern</data>
  <data key="d3">1001</data>
  <data key="d6">0.0</data>
  <data key="d4">0.0</data>
</node>
<node id="30">
  <data key="d0">Eggs</data>
  <data key="d1">Flensburg; Stadt</data>
  <data key="d2">Warehouse_EdekaSuedwest</data>
  <data key="d3">1001</data>
  <data key="d6">0.0</data>
  <data key="d4">0.0</data>
</node>
<node id="31">
  <data key="d0">Eggs</data>
  <data key="d1">Flensburg; Stadt</data>
  <data key="d2">Store_EdekaSuedwest</data>
  <data key="d3">1001</data>
  <data key="d6">0.0</data>
  <data key="d4">0.0</data>
</node>
<node id="32">
  <data key="d0">Eggs</data>
  <data key="d1">Flensburg; Stadt</data>
  <data key="d2">Warehouse_Globus</data>
  <data key="d3">1001</data>
  <data key="d6">0.0</data>
  <data key="d4">0.0</data>
</node>
<node id="33">
  <data key="d0">Eggs</data>
  <data key="d1">Flensburg; Stadt</data>
  <data key="d2">Store_Globus</data>
  <data key="d3">1001</data>
  <data key="d6">0.0</data>
  <data key="d4">0.0</data>
</node>
<node id="34">
  <data key="d0">Eggs</data>
  <data key="d1">Flensburg; Stadt</data>
  <data key="d2">Warehouse_Kaes</data>
  <data key="d3">1001</data>
  <data key="d6">0.0</data>
  <data key="d4">0.0</data>
</node>
<node id="35">
  <data key="d0">Eggs</data>
  <data key="d1">Flensburg; Stadt</data>
  <data key="d2">Store_Kaes</data>
  <data key="d3">1001</data>
  <data key="d6">0.0</data>
  <data key="d4">0.0</data>
</node>
<node id="36">
  <data key="d0">Eggs</data>
  <data key="d1">Flensburg; Stadt</data>
  <data key="d2">Warehouse_KaisersTengelmann</data>
  <data key="d3">1001</data>
  <data key="d6">0.0</data>
  <data key="d4">0.0</data>
</node>
<node id="37">
  <data key="d0">Eggs</data>
  <data key="d1">Flensburg; Stadt</data>
  <data key="d2">Store_KaisersTengelmann</data>
  <data key="d3">1001</data>
  <data key="d6">0.0</data>
  <data key="d4">0.0</data>
</node>
<node id="38">
  <data key="d0">Eggs</data>
  <data key="d1">Flensburg; Stadt</data>
  <data key="d2">Warehouse_Kaufland</data>
  <data key="d3">1001</data>
  <data key="d6">0.0</data>
  <data key="d4">0.0</data>
</node>
<node id="39">
  <data key="d0">Eggs</data>
  <data key="d1">Flensburg; Stadt</data>
  <data key="d2">Store_Kaufland</data>
  <data key="d3">1001</data>
  <data key="d6">0.0</data>
  <data key="d4">0.0</data>
</node>
<node id="40">
  <data key="d0">Eggs</data>
  <data key="d1">Flensburg; Stadt</data>
  <data key="d2">Warehouse_KlaasKock</data>
  <data key="d3">1001</data>
  <data key="d6">0.0</data>
  <data key="d4">0.0</data>
</node>
<node id="41">
  <data key="d0">Eggs</data>
  <data key="d1">Flensburg; Stadt</data>
  <data key="d2">Store_KlaasKock</data>
  <data key="d3">1001</data>
  <data key="d6">0.0</data>
  <data key="d4">0.0</data>
</node>
<node id="42">
  <data key="d0">Eggs</data>
  <data key="d1">Flensburg; Stadt</data>
  <data key="d2">Warehouse_Lidl</data>
  <data key="d3">1001</data>
  <data key="d6">0.0</data>
  <data key="d4">0.0</data>
</node>
<node id="43">
  <data key="d0">Eggs</data>
  <data key="d1">Flensburg; Stadt</data>
  <data key="d2">Store_Lidl</data>
  <data key="d3">1001</data>
  <data key="d6">80.57076272324569</data>
  <data key="d4">80.57076272324569</data>
</node>
<node id="44">
  <data key="d0">Eggs</data>
  <data key="d1">Flensburg; Stadt</data>
  <data key="d2">Warehouse_Netto</data>
  <data key="d3">1001</data>
  <data key="d6">0.0</data>
  <data key="d4">0.0</data>
</node>
<node id="45">
  <data key="d0">Eggs</data>
  <data key="d1">Flensburg; Stadt</data>
  <data key="d2">Store_Netto</data>
  <data key="d3">1001</data>
  <data key="d6">26.293353102882644</data>
  <data key="d4">26.293353102882644</data>
</node>
<node id="46">
  <data key="d0">Eggs</data>
  <data key="d1">Flensburg; Stadt</data>
  <data key="d2">Warehouse_NettoNord</data>
  <data key="d3">1001</data>
  <data key="d6">0.0</data>
  <data key="d4">0.0</data>
</node>
<node id="47">
  <data key="d0">Eggs</data>
  <data key="d1">Flensburg; Stadt</data>
  <data key="d2">Store_NettoNord</data>
  <data key="d3">1001</data>
  <data key="d6">0.0</data>
  <data key="d4">0.0</data>
</node>
<node id="48">
  <data key="d0">Eggs</data>
  <data key="d1">Flensburg; Stadt</data>
  <data key="d2">Warehouse_Norma</data>
  <data key="d3">1001</data>
  <data key="d6">0.0</data>
  <data key="d4">0.0</data>
</node>
<node id="49">
  <data key="d0">Eggs</data>
  <data key="d1">Flensburg; Stadt</data>
  <data key="d2">Store_Norma</data>
  <data key="d3">1001</data>
  <data key="d6">0.0</data>
  <data key="d4">0.0</data>
</node>
<node id="50">
  <data key="d0">Eggs</data>
  <data key="d1">Flensburg; Stadt</data>
  <data key="d2">Warehouse_Penny</data>
  <data key="d3">1001</data>
  <data key="d6">0.0</data>
  <data key="d4">0.0</data>
</node>
<node id="51">
  <data key="d0">Eggs</data>
  <data key="d1">Flensburg; Stadt</data>
  <data key="d2">Store_Penny</data>
  <data key="d3">1001</data>
  <data key="d6">38.94447865349358</data>
  <data key="d4">38.94447865349358</data>
</node>
<node id="52">
  <data key="d0">Eggs</data>
  <data key="d1">Flensburg; Stadt</data>
  <data key="d2">Warehouse_Real</data>
  <data key="d3">1001</data>
  <data key="d6">0.0</data>
  <data key="d4">0.0</data>
</node>
<node id="53">
  <data key="d0">Eggs</data>
  <data key="d1">Flensburg; Stadt</data>
  <data key="d2">Store_Real</data>
  <data key="d3">1001</data>
  <data key="d6">96.60329510305219</data>
  <data key="d4">96.60329510305219</data>
</node>
<node id="54">
  <data key="d0">Eggs</data>
  <data key="d1">Flensburg; Stadt</data>
  <data key="d2">Warehouse_ReweHit</data>
  <data key="d3">1001</data>
  <data key="d6">0.0</data>
  <data key="d4">0.0</data>
</node>
<node id="55">
  <data key="d0">Eggs</data>
  <data key="d1">Flensburg; Stadt</data>
  <data key="d2">Store_ReweHit</data>
  <data key="d3">1001</data>
  <data key="d6">20.113540621939052</data>
  <data key="d4">20.113540621939052</data>
</node>
<node id="56">
  <data key="d0">Eggs</data>
  <data key="d1">Flensburg; Stadt</data>
  <data key="d2">Warehouse_Tegut</data>
  <data key="d3">1001</data>
  <data key="d6">0.0</data>
  <data key="d4">0.0</data>
</node>
<node id="57">
  <data key="d0">Eggs</data>
  <data key="d1">Flensburg; Stadt</data>
  <data key="d2">Store_Tegut</data>
  <data key="d3">1001</data>
  <data key="d6">0.0</data>
  <data key="d4">0.0</data>
</node>
<node id="58">
  <data key="d0">Eggs</data>
  <data key="d1">Flensburg; Stadt</data>
  <data key="d2">Warehouse_Wasgau</data>
  <data key="d3">1001</data>
  <data key="d6">0.0</data>
  <data key="d4">0.0</data>
</node>
<node id="59">
  <data key="d0">Eggs</data>
  <data key="d1">Flensburg; Stadt</data>
  <data key="d2">Store_Wasgau</data>
  <data key="d3">1001</data>
  <data key="d6">0.0</data>
  <data key="d4">0.0</data>
</node>
<node id="60">
  <data key="d0">Eggs</data>
  <data key="d1">Kiel; Landeshauptstadt</data>
  <data key="d2">Producer</data>
  <data key="d3">1002</data>
  <data key="d4">79.14213877031204</data>
</node>
<node id="61">
  <data key="d0">Eggs</data>
  <data key="d1">Kiel; Landeshauptstadt</data>
  <data key="d2">Consumer</data>
  <data key="d3">1002</data>
  <data key="d5">2237.096197685587</data>
</node>
<node id="62">
  <data key="d0">Eggs</data>
  <data key="d1">Kiel; Landeshauptstadt</data>
  <data key="d2">Wholesale</data>
  <data key="d3">1002</data>
  <data key="d6">369.1208726181219</data>
  <data key="d4">369.1208726181219</data>
</node>
<node id="63">
  <data key="d0">Eggs</data>
  <data key="d1">Kiel; Landeshauptstadt</data>
  <data key="d2">Warehouse_AldiNord</data>
  <data key="d3">1002</data>
  <data key="d6">0.0</data>
  <data key="d4">0.0</data>
</node>
<node id="64">
  <data key="d0">Eggs</data>
  <data key="d1">Kiel; Landeshauptstadt</data>
  <data key="d2">Store_AldiNord</data>
  <data key="d3">1002</data>
  <data key="d6">393.06063291166515</data>
  <data key="d4">393.06063291166515</data>
</node>
<node id="65">
  <data key="d0">Eggs</data>
  <data key="d1">Kiel; Landeshauptstadt</data>
  <data key="d2">Warehouse_AldiSued</data>
  <data key="d3">1002</data>
  <data key="d6">0.0</data>
  <data key="d4">0.0</data>
</node>
<node id="66">
  <data key="d0">Eggs</data>
  <data key="d1">Kiel; Landeshauptstadt</data>
  <data key="d2">Store_AldiSued</data>
  <data key="d3">1002</data>
  <data key="d6">0.0</data>
  <data key="d4">0.0</data>
</node>
<node id="67">
  <data key="d0">Eggs</data>
  <data key="d1">Kiel; Landeshauptstadt</data>
  <data key="d2">Warehouse_Alnatura</data>
  <data key="d3">1002</data>
  <data key="d6">0.0</data>
  <data key="d4">0.0</data>
</node>
<node id="68">
  <data key="d0">Eggs</data>
  <data key="d1">Kiel; Landeshauptstadt</data>
  <data key="d2">Store_Alnatura</data>
  <data key="d3">1002</data>
  <data key="d6">0.0</data>
  <data key="d4">0.0</data>
</node>
<node id="69">
  <data key="d0">Eggs</data>
  <data key="d1">Kiel; Landeshauptstadt</data>
  <data key="d2">Warehouse_BartelsLangness</data>
  <data key="d3">1002</data>
  <data key="d6">0.0</data>
  <data key="d4">0.0</data>
</node>
<node id="70">
  <data key="d0">Eggs</data>
  <data key="d1">Kiel; Landeshauptstadt</data>
  <data key="d2">Store_BartelsLangness</data>
  <data key="d3">1002</data>
  <data key="d6">428.0900468765378</data>
  <data key="d4">428.0900468765378</data>
</node>
<node id="71">
  <data key="d0">Eggs</data>
  <data key="d1">Kiel; Landeshauptstadt</data>
  <data key="d2">Warehouse_Buenting</data>
  <data key="d3">1002</data>
  <data key="d6">0.0</data>
  <data key="d4">0.0</data>
</node>
<node id="72">
  <data key="d0">Eggs</data>
  <data key="d1">Kiel; Landeshauptstadt</data>
  <data key="d2">Store_Buenting</data>
  <data key="d3">1002</data>
  <data key="d6">0.0</data>
  <data key="d4">0.0</data>
</node>
<node id="73">
  <data key="d0">Eggs</data>
  <data key="d1">Kiel; Landeshauptstadt</data>
  <data key="d2">Warehouse_Coop</data>
  <data key="d3">1002</data>
  <data key="d6">3228.444594659073</data>
  <data key="d4">3228.444594659073</data>
</node>
<node id="74">
  <data key="d0">Eggs</data>
  <data key="d1">Kiel; Landeshauptstadt</data>
  <data key="d2">Store_Coop</data>
  <data key="d3">1002</data>
  <data key="d6">480.6341678238468</data>
  <data key="d4">480.6341678238468</data>
</node>
<node id="75">
  <data key="d0">Eggs</data>
  <data key="d1">Kiel; Landeshauptstadt</data>
  <data key="d2">Warehouse_Dennree</data>
  <data key="d3">1002</data>
  <data key="d6">0.0</data>
  <data key="d4">0.0</data>
</node>
<node id="76">
  <data key="d0">Eggs</data>
  <data key="d1">Kiel; Landeshauptstadt</data>
  <data key="d2">Store_Dennree</data>
  <data key="d3">1002</data>
  <data key="d6">11.775664645958388</data>
  <data key="d4">11.775664645958388</data>
</node>
<node id="77">
  <data key="d0">Eggs</data>
  <data key="d1">Kiel; Landeshauptstadt</data>
  <data key="d2">Warehouse_EdekaHessenring</data>
  <data key="d3">1002</data>
  <data key="d6">0.0</data>
  <data key="d4">0.0</data>
</node>
<node id="78">
  <data key="d0">Eggs</data>
  <data key="d1">Kiel; Landeshauptstadt</data>
  <data key="d2">Store_EdekaHessenring</data>
  <data key="d3">1002</data>
  <data key="d6">0.0</data>
  <data key="d4">0.0</data>
</node>
<node id="79">
  <data key="d0">Eggs</data>
  <data key="d1">Kiel; Landeshauptstadt</data>
  <data key="d2">Warehouse_EdekaMindenHannover</data>
  <data key="d3">1002</data>
  <data key="d6">0.0</data>
  <data key="d4">0.0</data>
</node>
<node id="80">
  <data key="d0">Eggs</data>
  <data key="d1">Kiel; Landeshauptstadt</data>
  <data key="d2">Store_EdekaMindenHannover</data>
  <data key="d3">1002</data>
  <data key="d6">0.0</data>
  <data key="d4">0.0</data>
</node>
<node id="81">
  <data key="d0">Eggs</data>
  <data key="d1">Kiel; Landeshauptstadt</data>
  <data key="d2">Warehouse_EdekaNord</data>
  <data key="d3">1002</data>
  <data key="d6">0.0</data>
  <data key="d4">0.0</data>
</node>
<node id="82">
  <data key="d0">Eggs</data>
  <data key="d1">Kiel; Landeshauptstadt</data>
  <data key="d2">Store_EdekaNord</data>
  <data key="d3">1002</data>
  <data key="d6">115.46102952499272</data>
  <data key="d4">115.46102952499272</data>
</node>
<node id="83">
  <data key="d0">Eggs</data>
  <data key="d1">Kiel; Landeshauptstadt</data>
  <data key="d2">Warehouse_EdekaNordbayern</data>
  <data key="d3">1002</data>
  <data key="d6">0.0</data>
  <data key="d4">0.0</data>
</node>
<node id="84">
  <data key="d0">Eggs</data>
  <data key="d1">Kiel; Landeshauptstadt</data>
  <data key="d2">Store_EdekaNordbayern</data>
  <data key="d3">1002</data>
  <data key="d6">0.0</data>
  <data key="d4">0.0</data>
</node>
<node id="85">
  <data key="d0">Eggs</data>
  <data key="d1">Kiel; Landeshauptstadt</data>
  <data key="d2">Warehouse_EdekaRheinRuhr</data>
  <data key="d3">1002</data>
  <data key="d6">0.0</data>
  <data key="d4">0.0</data>
</node>
<node id="86">
  <data key="d0">Eggs</data>
  <data key="d1">Kiel; Landeshauptstadt</data>
  <data key="d2">Store_EdekaRheinRuhr</data>
  <data key="d3">1002</data>
  <data key="d6">0.0</data>
  <data key="d4">0.0</data>
</node>
<node id="87">
  <data key="d0">Eggs</data>
  <data key="d1">Kiel; Landeshauptstadt</data>
  <data key="d2">Warehouse_EdekaSuedbayern</data>
  <data key="d3">1002</data>
  <data key="d6">0.0</data>
  <data key="d4">0.0</data>
</node>
<node id="88">
  <data key="d0">Eggs</data>
  <data key="d1">Kiel; Landeshauptstadt</data>
  <data key="d2">Store_EdekaSuedbayern</data>
  <data key="d3">1002</data>
  <data key="d6">0.0</data>
  <data key="d4">0.0</data>
</node>
<node id="89">
  <data key="d0">Eggs</data>
  <data key="d1">Kiel; Landeshauptstadt</data>
  <data key="d2">Warehouse_EdekaSuedwest</data>
  <data key="d3">1002</data>
  <data key="d6">0.0</data>
  <data key="d4">0.0</data>
</node>
<node id="90">
  <data key="d0">Eggs</data>
  <data key="d1">Kiel; Landeshauptstadt</data>
  <data key="d2">Store_EdekaSuedwest</data>
  <data key="d3">1002</data>
  <data key="d6">0.0</data>
  <data key="d4">0.0</data>
</node>
<node id="91">
  <data key="d0">Eggs</data>
  <data key="d1">Kiel; Landeshauptstadt</data>
  <data key="d2">Warehouse_Globus</data>
  <data key="d3">1002</data>
  <data key="d6">0.0</data>
  <data key="d4">0.0</data>
</node>
<node id="92">
  <data key="d0">Eggs</data>
  <data key="d1">Kiel; Landeshauptstadt</data>
  <data key="d2">Store_Globus</data>
  <data key="d3">1002</data>
  <data key="d6">0.0</data>
  <data key="d4">0.0</data>
</node>
<node id="93">
  <data key="d0">Eggs</data>
  <data key="d1">Kiel; Landeshauptstadt</data>
  <data key="d2">Warehouse_Kaes</data>
  <data key="d3">1002</data>
  <data key="d6">0.0</data>
  <data key="d4">0.0</data>
</node>
<node id="94">
  <data key="d0">Eggs</data>
  <data key="d1">Kiel; Landeshauptstadt</data>
  <data key="d2">Store_Kaes</data>
  <data key="d3">1002</data>
  <data key="d6">0.0</data>
  <data key="d4">0.0</data>
</node>
<node id="95">
  <data key="d0">Eggs</data>
  <data key="d1">Kiel; Landeshauptstadt</data>
  <data key="d2">Warehouse_KaisersTengelmann</data>
  <data key="d3">1002</data>
  <data key="d6">0.0</data>
  <data key="d4">0.0</data>
</node>
<node id="96">
  <data key="d0">Eggs</data>
  <data key="d1">Kiel; Landeshauptstadt</data>
  <data key="d2">Store_KaisersTengelmann</data>
  <data key="d3">1002</data>
  <data key="d6">0.0</data>
  <data key="d4">0.0</data>
</node>
<node id="97">
  <data key="d0">Eggs</data>
  <data key="d1">Kiel; Landeshauptstadt</data>
  <data key="d2">Warehouse_Kaufland</data>
  <data key="d3">1002</data>
  <data key="d6">0.0</data>
  <data key="d4">0.0</data>
</node>
<node id="98">
  <data key="d0">Eggs</data>
  <data key="d1">Kiel; Landeshauptstadt</data>
  <data key="d2">Store_Kaufland</data>
  <data key="d3">1002</data>
  <data key="d6">0.0</data>
  <data key="d4">0.0</data>
</node>
<node id="99">
  <data key="d0">Eggs</data>
  <data key="d1">Kiel; Landeshauptstadt</data>
  <data key="d2">Warehouse_KlaasKock</data>
  <data key="d3">1002</data>
  <data key="d6">0.0</data>
  <data key="d4">0.0</data>
</node>
<node id="100">
  <data key="d0">Eggs</data>
  <data key="d1">Kiel; Landeshauptstadt</data>
  <data key="d2">Store_KlaasKock</data>
  <data key="d3">1002</data>
  <data key="d6">0.0</data>
  <data key="d4">0.0</data>
</node>
<node id="101">
  <data key="d0">Eggs</data>
  <data key="d1">Kiel; Landeshauptstadt</data>
  <data key="d2">Warehouse_Lidl</data>
  <data key="d3">1002</data>
  <data key="d6">0.0</data>
  <data key="d4">0.0</data>
</node>
<node id="102">
  <data key="d0">Eggs</data>
  <data key="d1">Kiel; Landeshauptstadt</data>
  <data key="d2">Store_Lidl</data>
  <data key="d3">1002</data>
  <data key="d6">164.51921364570026</data>
  <data key="d4">164.51921364570026</data>
</node>
<node id="103">
  <data key="d0">Eggs</data>
  <data key="d1">Kiel; Landeshauptstadt</data>
  <data key="d2">Warehouse_Netto</data>
  <data key="d3">1002</data>
  <data key="d6">0.0</data>
  <data key="d4">0.0</data>
</node>
<node id="104">
  <data key="d0">Eggs</data>
  <data key="d1">Kiel; Landeshauptstadt</data>
  <data key="d2">Store_Netto</data>
  <data key="d3">1002</data>
  <data key="d6">63.89467134612079</data>
  <data key="d4">63.89467134612079</data>
</node>
<node id="105">
  <data key="d0">Eggs</data>
  <data key="d1">Kiel; Landeshauptstadt</data>
  <data key="d2">Warehouse_NettoNord</data>
  <data key="d3">1002</data>
  <data key="d6">0.0</data>
  <data key="d4">0.0</data>
</node>
<node id="106">
  <data key="d0">Eggs</data>
  <data key="d1">Kiel; Landeshauptstadt</data>
  <data key="d2">Store_NettoNord</data>
  <data key="d3">1002</data>
  <data key="d6">14.453884402981416</data>
  <data key="d4">14.453884402981416</data>
</node>
<node id="107">
  <data key="d0">Eggs</data>
  <data key="d1">Kiel; Landeshauptstadt</data>
  <data key="d2">Warehouse_Norma</data>
  <data key="d3">1002</data>
  <data key="d6">0.0</data>
  <data key="d4">0.0</data>
</node>
<node id="108">
  <data key="d0">Eggs</data>
  <data key="d1">Kiel; Landeshauptstadt</data>
  <data key="d2">Store_Norma</data>
  <data key="d3">1002</data>
  <data key="d6">0.0</data>
  <data key="d4">0.0</data>
</node>
<node id="109">
  <data key="d0">Eggs</data>
  <data key="d1">Kiel; Landeshauptstadt</data>
  <data key="d2">Warehouse_Penny</data>
  <data key="d3">1002</data>
  <data key="d6">0.0</data>
  <data key="d4">0.0</data>
</node>
<node id="110">
  <data key="d0">Eggs</data>
  <data key="d1">Kiel; Landeshauptstadt</data>
  <data key="d2">Store_Penny</data>
  <data key="d3">1002</data>
  <data key="d6">70.99407927346755</data>
  <data key="d4">70.99407927346755</data>
</node>
<node id="111">
  <data key="d0">Eggs</data>
  <data key="d1">Kiel; Landeshauptstadt</data>
  <data key="d2">Warehouse_Real</data>
  <data key="d3">1002</data>
  <data key="d6">0.0</data>
  <data key="d4">0.0</data>
</node>
<node id="112">
  <data key="d0">Eggs</data>
  <data key="d1">Kiel; Landeshauptstadt</data>
  <data key="d2">Store_Real</data>
  <data key="d3">1002</data>
  <data key="d6">0.0</data>
  <data key="d4">0.0</data>
</node>
<node id="113">
  <data key="d0">Eggs</data>
  <data key="d1">Kiel; Landeshauptstadt</data>
  <data key="d2">Warehouse_ReweHit</data>
  <data key="d3">1002</data>
  <data key="d6">0.0</data>
  <data key="d4">0.0</data>
</node>
<node id="114">
  <data key="d0">Eggs</data>
  <data key="d1">Kiel; Landeshauptstadt</data>
  <data key="d2">Store_ReweHit</data>
  <data key="d3">1002</data>
  <data key="d6">87.95613773461339</data>
  <data key="d4">87.95613773461339</data>
</node>
<node id="115">
  <data key="d0">Eggs</data>
  <data key="d1">Kiel; Landeshauptstadt</data>
  <data key="d2">Warehouse_Tegut</data>
  <data key="d3">1002</data>
  <data key="d6">0.0</data>
  <data key="d4">0.0</data>
</node>
<node id="116">
  <data key="d0">Eggs</data>
  <data key="d1">Kiel; Landeshauptstadt</data>
  <data key="d2">Store_Tegut</data>
  <data key="d3">1002</data>
  <data key="d6">0.0</data>
  <data key="d4">0.0</data>
</node>
<node id="117">
  <data key="d0">Eggs</data>
  <data key="d1">Kiel; Landeshauptstadt</data>
  <data key="d2">Warehouse_Wasgau</data>
  <data key="d3">1002</data>
  <data key="d6">0.0</data>
  <data key="d4">0.0</data>
</node>
<node id="118">
  <data key="d0">Eggs</data>
  <data key="d1">Kiel; Landeshauptstadt</data>
  <data key="d2">Store_Wasgau</data>
  <data key="d3">1002</data>
  <data key="d6">0.0</data>
  <data key="d4">0.0</data>
</node>
<node id="119">
  <data key="d0">Eggs</data>
  <data key="d1">Lübeck; Hansestadt</data>
  <data key="d2">Producer</data>
  <data key="d3">1003</data>
  <data key="d4">146.99781830422518</data>
</node>
<node id="120">
  <data key="d0">Eggs</data>
  <data key="d1">Lübeck; Hansestadt</data>
  <data key="d2">Consumer</data>
  <data key="d3">1003</data>
  <data key="d5">1974.528892384117</data>
</node>
<node id="121">
  <data key="d0">Eggs</data>
  <data key="d1">Lübeck; Hansestadt</data>
  <data key="d2">Wholesale</data>
  <data key="d3">1003</data>
  <data key="d6">325.7972672433794</data>
  <data key="d4">325.7972672433794</data>
</node>
<node id="122">
  <data key="d0">Eggs</data>
  <data key="d1">Lübeck; Hansestadt</data>
  <data key="d2">Warehouse_AldiNord</data>
  <data key="d3">1003</data>
  <data key="d6">0.0</data>
  <data key="d4">0.0</data>
</node>
<node id="123">
  <data key="d0">Eggs</data>
  <data key="d1">Lübeck; Hansestadt</data>
  <data key="d2">Store_AldiNord</data>
  <data key="d3">1003</data>
  <data key="d6">311.4678925024835</data>
  <data key="d4">311.4678925024835</data>
</node>
<node id="124">
  <data key="d0">Eggs</data>
  <data key="d1">Lübeck; Hansestadt</data>
  <data key="d2">Warehouse_AldiSued</data>
  <data key="d3">1003</data>
  <data key="d6">0.0</data>
  <data key="d4">0.0</data>
</node>
<node id="125">
  <data key="d0">Eggs</data>
  <data key="d1">Lübeck; Hansestadt</data>
  <data key="d2">Store_AldiSued</data>
  <data key="d3">1003</data>
  <data key="d6">0.0</data>
  <data key="d4">0.0</data>
</node>
<node id="126">
  <data key="d0">Eggs</data>
  <data key="d1">Lübeck; Hansestadt</data>
  <data key="d2">Warehouse_Alnatura</data>
  <data key="d3">1003</data>
  <data key="d6">0.0</data>
  <data key="d4">0.0</data>
</node>
<node id="127">
  <data key="d0">Eggs</data>
  <data key="d1">Lübeck; Hansestadt</data>
  <data key="d2">Store_Alnatura</data>
  <data key="d3">1003</data>
  <data key="d6">0.0</data>
  <data key="d4">0.0</data>
</node>
<node id="128">
  <data key="d0">Eggs</data>
  <data key="d1">Lübeck; Hansestadt</data>
  <data key="d2">Warehouse_BartelsLangness</data>
  <data key="d3">1003</data>
  <data key="d6">0.0</data>
  <data key="d4">0.0</data>
</node>
<node id="129">
  <data key="d0">Eggs</data>
  <data key="d1">Lübeck; Hansestadt</data>
  <data key="d2">Store_BartelsLangness</data>
  <data key="d3">1003</data>
  <data key="d6">133.93860486587437</data>
  <data key="d4">133.93860486587437</data>
</node>
<node id="130">
  <data key="d0">Eggs</data>
  <data key="d1">Lübeck; Hansestadt</data>
  <data key="d2">Warehouse_Buenting</data>
  <data key="d3">1003</data>
  <data key="d6">0.0</data>
  <data key="d4">0.0</data>
</node>
<node id="131">
  <data key="d0">Eggs</data>
  <data key="d1">Lübeck; Hansestadt</data>
  <data key="d2">Store_Buenting</data>
  <data key="d3">1003</data>
  <data key="d6">0.0</data>
  <data key="d4">0.0</data>
</node>
<node id="132">
  <data key="d0">Eggs</data>
  <data key="d1">Lübeck; Hansestadt</data>
  <data key="d2">Warehouse_Coop</data>
  <data key="d3">1003</data>
  <data key="d6">0.0</data>
  <data key="d4">0.0</data>
</node>
<node id="133">
  <data key="d0">Eggs</data>
  <data key="d1">Lübeck; Hansestadt</data>
  <data key="d2">Store_Coop</data>
  <data key="d3">1003</data>
  <data key="d6">408.55316896713396</data>
  <data key="d4">408.55316896713396</data>
</node>
<node id="134">
  <data key="d0">Eggs</data>
  <data key="d1">Lübeck; Hansestadt</data>
  <data key="d2">Warehouse_Dennree</data>
  <data key="d3">1003</data>
  <data key="d6">0.0</data>
  <data key="d4">0.0</data>
</node>
<node id="135">
  <data key="d0">Eggs</data>
  <data key="d1">Lübeck; Hansestadt</data>
  <data key="d2">Store_Dennree</data>
  <data key="d3">1003</data>
  <data key="d6">0.0</data>
  <data key="d4">0.0</data>
</node>
<node id="136">
  <data key="d0">Eggs</data>
  <data key="d1">Lübeck; Hansestadt</data>
  <data key="d2">Warehouse_EdekaHessenring</data>
  <data key="d3">1003</data>
  <data key="d6">0.0</data>
  <data key="d4">0.0</data>
</node>
<node id="137">
  <data key="d0">Eggs</data>
  <data key="d1">Lübeck; Hansestadt</data>
  <data key="d2">Store_EdekaHessenring</data>
  <data key="d3">1003</data>
  <data key="d6">0.0</data>
  <data key="d4">0.0</data>
</node>
<node id="138">
  <data key="d0">Eggs</data>
  <data key="d1">Lübeck; Hansestadt</data>
  <data key="d2">Warehouse_EdekaMindenHannover</data>
  <data key="d3">1003</data>
  <data key="d6">0.0</data>
  <data key="d4">0.0</data>
</node>
<node id="139">
  <data key="d0">Eggs</data>
  <data key="d1">Lübeck; Hansestadt</data>
  <data key="d2">Store_EdekaMindenHannover</data>
  <data key="d3">1003</data>
  <data key="d6">0.0</data>
  <data key="d4">0.0</data>
</node>
<node id="140">
  <data key="d0">Eggs</data>
  <data key="d1">Lübeck; Hansestadt</data>
  <data key="d2">Warehouse_EdekaNord</data>
  <data key="d3">1003</data>
  <data key="d6">0.0</data>
  <data key="d4">0.0</data>
</node>
<node id="141">
  <data key="d0">Eggs</data>
  <data key="d1">Lübeck; Hansestadt</data>
  <data key="d2">Store_EdekaNord</data>
  <data key="d3">1003</data>
  <data key="d6">145.72897501251825</data>
  <data key="d4">145.72897501251825</data>
</node>
<node id="142">
  <data key="d0">Eggs</data>
  <data key="d1">Lübeck; Hansestadt</data>
  <data key="d2">Warehouse_EdekaNordbayern</data>
  <data key="d3">1003</data>
  <data key="d6">0.0</data>
  <data key="d4">0.0</data>
</node>
<node id="143">
  <data key="d0">Eggs</data>
  <data key="d1">Lübeck; Hansestadt</data>
  <data key="d2">Store_EdekaNordbayern</data>
  <data key="d3">1003</data>
  <data key="d6">0.0</data>
  <data key="d4">0.0</data>
</node>
<node id="144">
  <data key="d0">Eggs</data>
  <data key="d1">Lübeck; Hansestadt</data>
  <data key="d2">Warehouse_EdekaRheinRuhr</data>
  <data key="d3">1003</data>
  <data key="d6">0.0</data>
  <data key="d4">0.0</data>
</node>
<node id="145">
  <data key="d0">Eggs</data>
  <data key="d1">Lübeck; Hansestadt</data>
  <data key="d2">Store_EdekaRheinRuhr</data>
  <data key="d3">1003</data>
  <data key="d6">0.0</data>
  <data key="d4">0.0</data>
</node>
<node id="146">
  <data key="d0">Eggs</data>
  <data key="d1">Lübeck; Hansestadt</data>
  <data key="d2">Warehouse_EdekaSuedbayern</data>
  <data key="d3">1003</data>
  <data key="d6">0.0</data>
  <data key="d4">0.0</data>
</node>
<node id="147">
  <data key="d0">Eggs</data>
  <data key="d1">Lübeck; Hansestadt</data>
  <data key="d2">Store_EdekaSuedbayern</data>
  <data key="d3">1003</data>
  <data key="d6">0.0</data>
  <data key="d4">0.0</data>
</node>
<node id="148">
  <data key="d0">Eggs</data>
  <data key="d1">Lübeck; Hansestadt</data>
  <data key="d2">Warehouse_EdekaSuedwest</data>
  <data key="d3">1003</data>
  <data key="d6">0.0</data>
  <data key="d4">0.0</data>
</node>
<node id="149">
  <data key="d0">Eggs</data>
  <data key="d1">Lübeck; Hansestadt</data>
  <data key="d2">Store_EdekaSuedwest</data>
  <data key="d3">1003</data>
  <data key="d6">0.0</data>
  <data key="d4">0.0</data>
</node>
<node id="150">
  <data key="d0">Eggs</data>
  <data key="d1">Lübeck; Hansestadt</data>
  <data key="d2">Warehouse_Globus</data>
  <data key="d3">1003</data>
  <data key="d6">0.0</data>
  <data key="d4">0.0</data>
</node>
<node id="151">
  <data key="d0">Eggs</data>
  <data key="d1">Lübeck; Hansestadt</data>
  <data key="d2">Store_Globus</data>
  <data key="d3">1003</data>
  <data key="d6">0.0</data>
  <data key="d4">0.0</data>
</node>
<node id="152">
  <data key="d0">Eggs</data>
  <data key="d1">Lübeck; Hansestadt</data>
  <data key="d2">Warehouse_Kaes</data>
  <data key="d3">1003</data>
  <data key="d6">0.0</data>
  <data key="d4">0.0</data>
</node>
<node id="153">
  <data key="d0">Eggs</data>
  <data key="d1">Lübeck; Hansestadt</data>
  <data key="d2">Store_Kaes</data>
  <data key="d3">1003</data>
  <data key="d6">0.0</data>
  <data key="d4">0.0</data>
</node>
<node id="154">
  <data key="d0">Eggs</data>
  <data key="d1">Lübeck; Hansestadt</data>
  <data key="d2">Warehouse_KaisersTengelmann</data>
  <data key="d3">1003</data>
  <data key="d6">0.0</data>
  <data key="d4">0.0</data>
</node>
<node id="155">
  <data key="d0">Eggs</data>
  <data key="d1">Lübeck; Hansestadt</data>
  <data key="d2">Store_KaisersTengelmann</data>
  <data key="d3">1003</data>
  <data key="d6">0.0</data>
  <data key="d4">0.0</data>
</node>
<node id="156">
  <data key="d0">Eggs</data>
  <data key="d1">Lübeck; Hansestadt</data>
  <data key="d2">Warehouse_Kaufland</data>
  <data key="d3">1003</data>
  <data key="d6">0.0</data>
  <data key="d4">0.0</data>
</node>
<node id="157">
  <data key="d0">Eggs</data>
  <data key="d1">Lübeck; Hansestadt</data>
  <data key="d2">Store_Kaufland</data>
  <data key="d3">1003</data>
  <data key="d6">0.0</data>
  <data key="d4">0.0</data>
</node>
<node id="158">
  <data key="d0">Eggs</data>
  <data key="d1">Lübeck; Hansestadt</data>
  <data key="d2">Warehouse_KlaasKock</data>
  <data key="d3">1003</data>
  <data key="d6">0.0</data>
  <data key="d4">0.0</data>
</node>
<node id="159">
  <data key="d0">Eggs</data>
  <data key="d1">Lübeck; Hansestadt</data>
  <data key="d2">Store_KlaasKock</data>
  <data key="d3">1003</data>
  <data key="d6">0.0</data>
  <data key="d4">0.0</data>
</node>
<node id="160">
  <data key="d0">Eggs</data>
  <data key="d1">Lübeck; Hansestadt</data>
  <data key="d2">Warehouse_Lidl</data>
  <data key="d3">1003</data>
  <data key="d6">0.0</data>
  <data key="d4">0.0</data>
</node>
<node id="161">
  <data key="d0">Eggs</data>
  <data key="d1">Lübeck; Hansestadt</data>
  <data key="d2">Store_Lidl</data>
  <data key="d3">1003</data>
  <data key="d6">148.96290510988342</data>
  <data key="d4">148.96290510988342</data>
</node>
<node id="162">
  <data key="d0">Eggs</data>
  <data key="d1">Lübeck; Hansestadt</data>
  <data key="d2">Warehouse_Netto</data>
  <data key="d3">1003</data>
  <data key="d6">0.0</data>
  <data key="d4">0.0</data>
</node>
<node id="163">
  <data key="d0">Eggs</data>
  <data key="d1">Lübeck; Hansestadt</data>
  <data key="d2">Store_Netto</data>
  <data key="d3">1003</data>
  <data key="d6">91.12271784763335</data>
  <data key="d4">91.12271784763335</data>
</node>
<node id="164">
  <data key="d0">Eggs</data>
  <data key="d1">Lübeck; Hansestadt</data>
  <data key="d2">Warehouse_NettoNord</data>
  <data key="d3">1003</data>
  <data key="d6">0.0</data>
  <data key="d4">0.0</data>
</node>
<node id="165">
  <data key="d0">Eggs</data>
  <data key="d1">Lübeck; Hansestadt</data>
  <data key="d2">Store_NettoNord</data>
  <data key="d3">1003</data>
  <data key="d6">11.453502428168331</data>
  <data key="d4">11.453502428168331</data>
</node>
<node id="166">
  <data key="d0">Eggs</data>
  <data key="d1">Lübeck; Hansestadt</data>
  <data key="d2">Warehouse_Norma</data>
  <data key="d3">1003</data>
  <data key="d6">0.0</data>
  <data key="d4">0.0</data>
</node>
<node id="167">
  <data key="d0">Eggs</data>
  <data key="d1">Lübeck; Hansestadt</data>
  <data key="d2">Store_Norma</data>
  <data key="d3">1003</data>
  <data key="d6">15.091673787704156</data>
  <data key="d4">15.091673787704156</data>
</node>
<node id="168">
  <data key="d0">Eggs</data>
  <data key="d1">Lübeck; Hansestadt</data>
  <data key="d2">Warehouse_Penny</data>
  <data key="d3">1003</data>
  <data key="d6">0.0</data>
  <data key="d4">0.0</data>
</node>
<node id="169">
  <data key="d0">Eggs</data>
  <data key="d1">Lübeck; Hansestadt</data>
  <data key="d2">Store_Penny</data>
  <data key="d3">1003</data>
  <data key="d6">123.73151299606553</data>
  <data key="d4">123.73151299606553</data>
</node>
<node id="170">
  <data key="d0">Eggs</data>
  <data key="d1">Lübeck; Hansestadt</data>
  <data key="d2">Warehouse_Real</data>
  <data key="d3">1003</data>
  <data key="d6">0.0</data>
  <data key="d4">0.0</data>
</node>
<node id="171">
  <data key="d0">Eggs</data>
  <data key="d1">Lübeck; Hansestadt</data>
  <data key="d2">Store_Real</data>
  <data key="d3">1003</data>
  <data key="d6">111.63796190279369</data>
  <data key="d4">111.63796190279369</data>
</node>
<node id="172">
  <data key="d0">Eggs</data>
  <data key="d1">Lübeck; Hansestadt</data>
  <data key="d2">Warehouse_ReweHit</data>
  <data key="d3">1003</data>
  <data key="d6">0.0</data>
  <data key="d4">0.0</data>
</node>
<node id="173">
  <data key="d0">Eggs</data>
  <data key="d1">Lübeck; Hansestadt</data>
  <data key="d2">Store_ReweHit</data>
  <data key="d3">1003</data>
  <data key="d6">114.2655301069029</data>
  <data key="d4">114.2655301069029</data>
</node>
<node id="174">
  <data key="d0">Eggs</data>
  <data key="d1">Lübeck; Hansestadt</data>
  <data key="d2">Warehouse_Tegut</data>
  <data key="d3">1003</data>
  <data key="d6">0.0</data>
  <data key="d4">0.0</data>
</node>
<node id="175">
  <data key="d0">Eggs</data>
  <data key="d1">Lübeck; Hansestadt</data>
  <data key="d2">Store_Tegut</data>
  <data key="d3">1003</data>
  <data key="d6">0.0</data>
  <data key="d4">0.0</data>
</node>
<node id="176">
  <data key="d0">Eggs</data>
  <data key="d1">Lübeck; Hansestadt</data>
  <data key="d2">Warehouse_Wasgau</data>
  <data key="d3">1003</data>
  <data key="d6">0.0</data>
  <data key="d4">0.0</data>
</node>
<node id="177">
  <data key="d0">Eggs</data>
  <data key="d1">Lübeck; Hansestadt</data>
  <data key="d2">Store_Wasgau</data>
  <data key="d3">1003</data>
  <data key="d6">0.0</data>
  <data key="d4">0.0</data>
</node>
<node id="178">
  <data key="d0">Eggs</data>
  <data key="d1">Neumünster; Stadt</data>
  <data key="d2">Producer</data>
  <data key="d3">1004</data>
  <data key="d4">108.54170243115708</data>
</node>
<node id="179">
  <data key="d0">Eggs</data>
  <data key="d1">Neumünster; Stadt</data>
  <data key="d2">Consumer</data>
  <data key="d3">1004</data>
  <data key="d5">717.6789937219264</data>
</node>
<node id="180">
  <data key="d0">Eggs</data>
  <data key="d1">Neumünster; Stadt</data>
  <data key="d2">Wholesale</data>
  <data key="d3">1004</data>
  <data key="d6">118.41703396411786</data>
  <data key="d4">118.41703396411786</data>
</node>
<node id="181">
  <data key="d0">Eggs</data>
  <data key="d1">Neumünster; Stadt</data>
  <data key="d2">Warehouse_AldiNord</data>
  <data key="d3">1004</data>
  <data key="d6">0.0</data>
  <data key="d4">0.0</data>
</node>
<node id="182">
  <data key="d0">Eggs</data>
  <data key="d1">Neumünster; Stadt</data>
  <data key="d2">Store_AldiNord</data>
  <data key="d3">1004</data>
  <data key="d6">75.85923768477772</data>
  <data key="d4">75.85923768477772</data>
</node>
<node id="183">
  <data key="d0">Eggs</data>
  <data key="d1">Neumünster; Stadt</data>
  <data key="d2">Warehouse_AldiSued</data>
  <data key="d3">1004</data>
  <data key="d6">0.0</data>
  <data key="d4">0.0</data>
</node>
<node id="184">
  <data key="d0">Eggs</data>
  <data key="d1">Neumünster; Stadt</data>
  <data key="d2">Store_AldiSued</data>
  <data key="d3">1004</data>
  <data key="d6">0.0</data>
  <data key="d4">0.0</data>
</node>
<node id="185">
  <data key="d0">Eggs</data>
  <data key="d1">Neumünster; Stadt</data>
  <data key="d2">Warehouse_Alnatura</data>
  <data key="d3">1004</data>
  <data key="d6">0.0</data>
  <data key="d4">0.0</data>
</node>
<node id="186">
  <data key="d0">Eggs</data>
  <data key="d1">Neumünster; Stadt</data>
  <data key="d2">Store_Alnatura</data>
  <data key="d3">1004</data>
  <data key="d6">0.0</data>
  <data key="d4">0.0</data>
</node>
<node id="187">
  <data key="d0">Eggs</data>
  <data key="d1">Neumünster; Stadt</data>
  <data key="d2">Warehouse_BartelsLangness</data>
  <data key="d3">1004</data>
  <data key="d6">4507.7426833585605</data>
  <data key="d4">4507.7426833585605</data>
</node>
<node id="188">
  <data key="d0">Eggs</data>
  <data key="d1">Neumünster; Stadt</data>
  <data key="d2">Store_BartelsLangness</data>
  <data key="d3">1004</data>
  <data key="d6">118.2189922535307</data>
  <data key="d4">118.2189922535307</data>
</node>
<node id="189">
  <data key="d0">Eggs</data>
  <data key="d1">Neumünster; Stadt</data>
  <data key="d2">Warehouse_Buenting</data>
  <data key="d3">1004</data>
  <data key="d6">0.0</data>
  <data key="d4">0.0</data>
</node>
<node id="190">
  <data key="d0">Eggs</data>
  <data key="d1">Neumünster; Stadt</data>
  <data key="d2">Store_Buenting</data>
  <data key="d3">1004</data>
  <data key="d6">0.0</data>
  <data key="d4">0.0</data>
</node>
<node id="191">
  <data key="d0">Eggs</data>
  <data key="d1">Neumünster; Stadt</data>
  <data key="d2">Warehouse_Coop</data>
  <data key="d3">1004</data>
  <data key="d6">0.0</data>
  <data key="d4">0.0</data>
</node>
<node id="192">
  <data key="d0">Eggs</data>
  <data key="d1">Neumünster; Stadt</data>
  <data key="d2">Store_Coop</data>
  <data key="d3">1004</data>
  <data key="d6">11.649616169327798</data>
  <data key="d4">11.649616169327798</data>
</node>
<node id="193">
  <data key="d0">Eggs</data>
  <data key="d1">Neumünster; Stadt</data>
  <data key="d2">Warehouse_Dennree</data>
  <data key="d3">1004</data>
  <data key="d6">0.0</data>
  <data key="d4">0.0</data>
</node>
<node id="194">
  <data key="d0">Eggs</data>
  <data key="d1">Neumünster; Stadt</data>
  <data key="d2">Store_Dennree</data>
  <data key="d3">1004</data>
  <data key="d6">0.0</data>
  <data key="d4">0.0</data>
</node>
<node id="195">
  <data key="d0">Eggs</data>
  <data key="d1">Neumünster; Stadt</data>
  <data key="d2">Warehouse_EdekaHessenring</data>
  <data key="d3">1004</data>
  <data key="d6">0.0</data>
  <data key="d4">0.0</data>
</node>
<node id="196">
  <data key="d0">Eggs</data>
  <data key="d1">Neumünster; Stadt</data>
  <data key="d2">Store_EdekaHessenring</data>
  <data key="d3">1004</data>
  <data key="d6">0.0</data>
  <data key="d4">0.0</data>
</node>
<node id="197">
  <data key="d0">Eggs</data>
  <data key="d1">Neumünster; Stadt</data>
  <data key="d2">Warehouse_EdekaMindenHannover</data>
  <data key="d3">1004</data>
  <data key="d6">0.0</data>
  <data key="d4">0.0</data>
</node>
<node id="198">
  <data key="d0">Eggs</data>
  <data key="d1">Neumünster; Stadt</data>
  <data key="d2">Store_EdekaMindenHannover</data>
  <data key="d3">1004</data>
  <data key="d6">0.0</data>
  <data key="d4">0.0</data>
</node>
<node id="199">
  <data key="d0">Eggs</data>
  <data key="d1">Neumünster; Stadt</data>
  <data key="d2">Warehouse_EdekaNord</data>
  <data key="d3">1004</data>
  <data key="d6">4411.379625798403</data>
  <data key="d4">4411.379625798403</data>
</node>
<node id="200">
  <data key="d0">Eggs</data>
  <data key="d1">Neumünster; Stadt</data>
  <data key="d2">Store_EdekaNord</data>
  <data key="d3">1004</data>
  <data key="d6">142.69412481585084</data>
  <data key="d4">142.69412481585084</data>
</node>
<node id="201">
  <data key="d0">Eggs</data>
  <data key="d1">Neumünster; Stadt</data>
  <data key="d2">Warehouse_EdekaNordbayern</data>
  <data key="d3">1004</data>
  <data key="d6">0.0</data>
  <data key="d4">0.0</data>
</node>
<node id="202">
  <data key="d0">Eggs</data>
  <data key="d1">Neumünster; Stadt</data>
  <data key="d2">Store_EdekaNordbayern</data>
  <data key="d3">1004</data>
  <data key="d6">0.0</data>
  <data key="d4">0.0</data>
</node>
<node id="203">
  <data key="d0">Eggs</data>
  <data key="d1">Neumünster; Stadt</data>
  <data key="d2">Warehouse_EdekaRheinRuhr</data>
  <data key="d3">1004</data>
  <data key="d6">0.0</data>
  <data key="d4">0.0</data>
</node>
<node id="204">
  <data key="d0">Eggs</data>
  <data key="d1">Neumünster; Stadt</data>
  <data key="d2">Store_EdekaRheinRuhr</data>
  <data key="d3">1004</data>
  <data key="d6">0.0</data>
  <data key="d4">0.0</data>
</node>
<node id="205">
  <data key="d0">Eggs</data>
  <data key="d1">Neumünster; Stadt</data>
  <data key="d2">Warehouse_EdekaSuedbayern</data>
  <data key="d3">1004</data>
  <data key="d6">0.0</data>
  <data key="d4">0.0</data>
</node>
<node id="206">
  <data key="d0">Eggs</data>
  <data key="d1">Neumünster; Stadt</data>
  <data key="d2">Store_EdekaSuedbayern</data>
  <data key="d3">1004</data>
  <data key="d6">0.0</data>
  <data key="d4">0.0</data>
</node>
<node id="207">
  <data key="d0">Eggs</data>
  <data key="d1">Neumünster; Stadt</data>
  <data key="d2">Warehouse_EdekaSuedwest</data>
  <data key="d3">1004</data>
  <data key="d6">0.0</data>
  <data key="d4">0.0</data>
</node>
<node id="208">
  <data key="d0">Eggs</data>
  <data key="d1">Neumünster; Stadt</data>
  <data key="d2">Store_EdekaSuedwest</data>
  <data key="d3">1004</data>
  <data key="d6">0.0</data>
  <data key="d4">0.0</data>
</node>
<node id="209">
  <data key="d0">Eggs</data>
  <data key="d1">Neumünster; Stadt</data>
  <data key="d2">Warehouse_Globus</data>
  <data key="d3">1004</data>
  <data key="d6">0.0</data>
  <data key="d4">0.0</data>
</node>
<node id="210">
  <data key="d0">Eggs</data>
  <data key="d1">Neumünster; Stadt</data>
  <data key="d2">Store_Globus</data>
  <data key="d3">1004</data>
  <data key="d6">0.0</data>
  <data key="d4">0.0</data>
</node>
<node id="211">
  <data key="d0">Eggs</data>
  <data key="d1">Neumünster; Stadt</data>
  <data key="d2">Warehouse_Kaes</data>
  <data key="d3">1004</data>
  <data key="d6">0.0</data>
  <data key="d4">0.0</data>
</node>
<node id="212">
  <data key="d0">Eggs</data>
  <data key="d1">Neumünster; Stadt</data>
  <data key="d2">Store_Kaes</data>
  <data key="d3">1004</data>
  <data key="d6">0.0</data>
  <data key="d4">0.0</data>
</node>
<node id="213">
  <data key="d0">Eggs</data>
  <data key="d1">Neumünster; Stadt</data>
  <data key="d2">Warehouse_KaisersTengelmann</data>
  <data key="d3">1004</data>
  <data key="d6">0.0</data>
  <data key="d4">0.0</data>
</node>
<node id="214">
  <data key="d0">Eggs</data>
  <data key="d1">Neumünster; Stadt</data>
  <data key="d2">Store_KaisersTengelmann</data>
  <data key="d3">1004</data>
  <data key="d6">0.0</data>
  <data key="d4">0.0</data>
</node>
<node id="215">
  <data key="d0">Eggs</data>
  <data key="d1">Neumünster; Stadt</data>
  <data key="d2">Warehouse_Kaufland</data>
  <data key="d3">1004</data>
  <data key="d6">0.0</data>
  <data key="d4">0.0</data>
</node>
<node id="216">
  <data key="d0">Eggs</data>
  <data key="d1">Neumünster; Stadt</data>
  <data key="d2">Store_Kaufland</data>
  <data key="d3">1004</data>
  <data key="d6">0.0</data>
  <data key="d4">0.0</data>
</node>
<node id="217">
  <data key="d0">Eggs</data>
  <data key="d1">Neumünster; Stadt</data>
  <data key="d2">Warehouse_KlaasKock</data>
  <data key="d3">1004</data>
  <data key="d6">0.0</data>
  <data key="d4">0.0</data>
</node>
<node id="218">
  <data key="d0">Eggs</data>
  <data key="d1">Neumünster; Stadt</data>
  <data key="d2">Store_KlaasKock</data>
  <data key="d3">1004</data>
  <data key="d6">0.0</data>
  <data key="d4">0.0</data>
</node>
<node id="219">
  <data key="d0">Eggs</data>
  <data key="d1">Neumünster; Stadt</data>
  <data key="d2">Warehouse_Lidl</data>
  <data key="d3">1004</data>
  <data key="d6">0.0</data>
  <data key="d4">0.0</data>
</node>
<node id="220">
  <data key="d0">Eggs</data>
  <data key="d1">Neumünster; Stadt</data>
  <data key="d2">Store_Lidl</data>
  <data key="d3">1004</data>
  <data key="d6">60.46314870982105</data>
  <data key="d4">60.46314870982105</data>
</node>
<node id="221">
  <data key="d0">Eggs</data>
  <data key="d1">Neumünster; Stadt</data>
  <data key="d2">Warehouse_Netto</data>
  <data key="d3">1004</data>
  <data key="d6">0.0</data>
  <data key="d4">0.0</data>
</node>
<node id="222">
  <data key="d0">Eggs</data>
  <data key="d1">Neumünster; Stadt</data>
  <data key="d2">Store_Netto</data>
  <data key="d3">1004</data>
  <data key="d6">32.8705132289484</data>
  <data key="d4">32.8705132289484</data>
</node>
<node id="223">
  <data key="d0">Eggs</data>
  <data key="d1">Neumünster; Stadt</data>
  <data key="d2">Warehouse_NettoNord</data>
  <data key="d3">1004</data>
  <data key="d6">0.0</data>
  <data key="d4">0.0</data>
</node>
<node id="224">
  <data key="d0">Eggs</data>
  <data key="d1">Neumünster; Stadt</data>
  <data key="d2">Store_NettoNord</data>
  <data key="d3">1004</data>
  <data key="d6">9.297815721998713</data>
  <data key="d4">9.297815721998713</data>
</node>
<node id="225">
  <data key="d0">Eggs</data>
  <data key="d1">Neumünster; Stadt</data>
  <data key="d2">Warehouse_Norma</data>
  <data key="d3">1004</data>
  <data key="d6">0.0</data>
  <data key="d4">0.0</data>
</node>
<node id="226">
  <data key="d0">Eggs</data>
  <data key="d1">Neumünster; Stadt</data>
  <data key="d2">Store_Norma</data>
  <data key="d3">1004</data>
  <data key="d6">0.0</data>
  <data key="d4">0.0</data>
</node>
<node id="227">
  <data key="d0">Eggs</data>
  <data key="d1">Neumünster; Stadt</data>
  <data key="d2">Warehouse_Penny</data>
  <data key="d3">1004</data>
  <data key="d6">0.0</data>
  <data key="d4">0.0</data>
</node>
<node id="228">
  <data key="d0">Eggs</data>
  <data key="d1">Neumünster; Stadt</data>
  <data key="d2">Store_Penny</data>
  <data key="d3">1004</data>
  <data key="d6">45.66868310511132</data>
  <data key="d4">45.66868310511132</data>
</node>
<node id="229">
  <data key="d0">Eggs</data>
  <data key="d1">Neumünster; Stadt</data>
  <data key="d2">Warehouse_Real</data>
  <data key="d3">1004</data>
  <data key="d6">0.0</data>
  <data key="d4">0.0</data>
</node>
<node id="230">
  <data key="d0">Eggs</data>
  <data key="d1">Neumünster; Stadt</data>
  <data key="d2">Store_Real</data>
  <data key="d3">1004</data>
  <data key="d6">90.62635677265804</data>
  <data key="d4">90.62635677265804</data>
</node>
<node id="231">
  <data key="d0">Eggs</data>
  <data key="d1">Neumünster; Stadt</data>
  <data key="d2">Warehouse_ReweHit</data>
  <data key="d3">1004</data>
  <data key="d6">0.0</data>
  <data key="d4">0.0</data>
</node>
<node id="232">
  <data key="d0">Eggs</data>
  <data key="d1">Neumünster; Stadt</data>
  <data key="d2">Store_ReweHit</data>
  <data key="d3">1004</data>
  <data key="d6">0.0</data>
  <data key="d4">0.0</data>
</node>
<node id="233">
  <data key="d0">Eggs</data>
  <data key="d1">Neumünster; Stadt</data>
  <data key="d2">Warehouse_Tegut</data>
  <data key="d3">1004</data>
  <data key="d6">0.0</data>
  <data key="d4">0.0</data>
</node>
<node id="234">
  <data key="d0">Eggs</data>
  <data key="d1">Neumünster; Stadt</data>
  <data key="d2">Store_Tegut</data>
  <data key="d3">1004</data>
  <data key="d6">0.0</data>
  <data key="d4">0.0</data>
</node>
<node id="235">
  <data key="d0">Eggs</data>
  <data key="d1">Neumünster; Stadt</data>
  <data key="d2">Warehouse_Wasgau</data>
  <data key="d3">1004</data>
  <data key="d6">0.0</data>
  <data key="d4">0.0</data>
</node>
<node id="236">
  <data key="d0">Eggs</data>
  <data key="d1">Neumünster; Stadt</data>
  <data key="d2">Store_Wasgau</data>
  <data key="d3">1004</data>
  <data key="d6">0.0</data>
  <data key="d4">0.0</data>
</node>
<node id="237">
  <data key="d0">Eggs</data>
  <data key="d1">Dithmarschen</data>
  <data key="d2">Producer</data>
  <data key="d3">1051</data>
  <data key="d4">466.28529510793345</data>
</node>
<node id="238">
  <data key="d0">Eggs</data>
  <data key="d1">Dithmarschen</data>
  <data key="d2">Consumer</data>
  <data key="d3">1051</data>
  <data key="d5">1240.090283430182</data>
</node>
<node id="239">
  <data key="d0">Eggs</data>
  <data key="d1">Dithmarschen</data>
  <data key="d2">Wholesale</data>
  <data key="d3">1051</data>
  <data key="d6">204.61489676598006</data>
  <data key="d4">204.61489676598006</data>
</node>
<node id="240">
  <data key="d0">Eggs</data>
  <data key="d1">Dithmarschen</data>
  <data key="d2">Warehouse_AldiNord</data>
  <data key="d3">1051</data>
  <data key="d6">0.0</data>
  <data key="d4">0.0</data>
</node>
<node id="241">
  <data key="d0">Eggs</data>
  <data key="d1">Dithmarschen</data>
  <data key="d2">Store_AldiNord</data>
  <data key="d3">1051</data>
  <data key="d6">171.35146373700485</data>
  <data key="d4">171.35146373700485</data>
</node>
<node id="242">
  <data key="d0">Eggs</data>
  <data key="d1">Dithmarschen</data>
  <data key="d2">Warehouse_AldiSued</data>
  <data key="d3">1051</data>
  <data key="d6">0.0</data>
  <data key="d4">0.0</data>
</node>
<node id="243">
  <data key="d0">Eggs</data>
  <data key="d1">Dithmarschen</data>
  <data key="d2">Store_AldiSued</data>
  <data key="d3">1051</data>
  <data key="d6">0.0</data>
  <data key="d4">0.0</data>
</node>
<node id="244">
  <data key="d0">Eggs</data>
  <data key="d1">Dithmarschen</data>
  <data key="d2">Warehouse_Alnatura</data>
  <data key="d3">1051</data>
  <data key="d6">0.0</data>
  <data key="d4">0.0</data>
</node>
<node id="245">
  <data key="d0">Eggs</data>
  <data key="d1">Dithmarschen</data>
  <data key="d2">Store_Alnatura</data>
  <data key="d3">1051</data>
  <data key="d6">0.0</data>
  <data key="d4">0.0</data>
</node>
<node id="246">
  <data key="d0">Eggs</data>
  <data key="d1">Dithmarschen</data>
  <data key="d2">Warehouse_BartelsLangness</data>
  <data key="d3">1051</data>
  <data key="d6">0.0</data>
  <data key="d4">0.0</data>
</node>
<node id="247">
  <data key="d0">Eggs</data>
  <data key="d1">Dithmarschen</data>
  <data key="d2">Store_BartelsLangness</data>
  <data key="d3">1051</data>
  <data key="d6">34.09733524975727</data>
  <data key="d4">34.09733524975727</data>
</node>
<node id="248">
  <data key="d0">Eggs</data>
  <data key="d1">Dithmarschen</data>
  <data key="d2">Warehouse_Buenting</data>
  <data key="d3">1051</data>
  <data key="d6">0.0</data>
  <data key="d4">0.0</data>
</node>
<node id="249">
  <data key="d0">Eggs</data>
  <data key="d1">Dithmarschen</data>
  <data key="d2">Store_Buenting</data>
  <data key="d3">1051</data>
  <data key="d6">0.0</data>
  <data key="d4">0.0</data>
</node>
<node id="250">
  <data key="d0">Eggs</data>
  <data key="d1">Dithmarschen</data>
  <data key="d2">Warehouse_Coop</data>
  <data key="d3">1051</data>
  <data key="d6">0.0</data>
  <data key="d4">0.0</data>
</node>
<node id="251">
  <data key="d0">Eggs</data>
  <data key="d1">Dithmarschen</data>
  <data key="d2">Store_Coop</data>
  <data key="d3">1051</data>
  <data key="d6">224.72120586705972</data>
  <data key="d4">224.72120586705972</data>
</node>
<node id="252">
  <data key="d0">Eggs</data>
  <data key="d1">Dithmarschen</data>
  <data key="d2">Warehouse_Dennree</data>
  <data key="d3">1051</data>
  <data key="d6">0.0</data>
  <data key="d4">0.0</data>
</node>
<node id="253">
  <data key="d0">Eggs</data>
  <data key="d1">Dithmarschen</data>
  <data key="d2">Store_Dennree</data>
  <data key="d3">1051</data>
  <data key="d6">0.0</data>
  <data key="d4">0.0</data>
</node>
<node id="254">
  <data key="d0">Eggs</data>
  <data key="d1">Dithmarschen</data>
  <data key="d2">Warehouse_EdekaHessenring</data>
  <data key="d3">1051</data>
  <data key="d6">0.0</data>
  <data key="d4">0.0</data>
</node>
<node id="255">
  <data key="d0">Eggs</data>
  <data key="d1">Dithmarschen</data>
  <data key="d2">Store_EdekaHessenring</data>
  <data key="d3">1051</data>
  <data key="d6">0.0</data>
  <data key="d4">0.0</data>
</node>
<node id="256">
  <data key="d0">Eggs</data>
  <data key="d1">Dithmarschen</data>
  <data key="d2">Warehouse_EdekaMindenHannover</data>
  <data key="d3">1051</data>
  <data key="d6">0.0</data>
  <data key="d4">0.0</data>
</node>
<node id="257">
  <data key="d0">Eggs</data>
  <data key="d1">Dithmarschen</data>
  <data key="d2">Store_EdekaMindenHannover</data>
  <data key="d3">1051</data>
  <data key="d6">0.0</data>
  <data key="d4">0.0</data>
</node>
<node id="258">
  <data key="d0">Eggs</data>
  <data key="d1">Dithmarschen</data>
  <data key="d2">Warehouse_EdekaNord</data>
  <data key="d3">1051</data>
  <data key="d6">0.0</data>
  <data key="d4">0.0</data>
</node>
<node id="259">
  <data key="d0">Eggs</data>
  <data key="d1">Dithmarschen</data>
  <data key="d2">Store_EdekaNord</data>
  <data key="d3">1051</data>
  <data key="d6">360.4619562499249</data>
  <data key="d4">360.4619562499249</data>
</node>
<node id="260">
  <data key="d0">Eggs</data>
  <data key="d1">Dithmarschen</data>
  <data key="d2">Warehouse_EdekaNordbayern</data>
  <data key="d3">1051</data>
  <data key="d6">0.0</data>
  <data key="d4">0.0</data>
</node>
<node id="261">
  <data key="d0">Eggs</data>
  <data key="d1">Dithmarschen</data>
  <data key="d2">Store_EdekaNordbayern</data>
  <data key="d3">1051</data>
  <data key="d6">0.0</data>
  <data key="d4">0.0</data>
</node>
<node id="262">
  <data key="d0">Eggs</data>
  <data key="d1">Dithmarschen</data>
  <data key="d2">Warehouse_EdekaRheinRuhr</data>
  <data key="d3">1051</data>
  <data key="d6">0.0</data>
  <data key="d4">0.0</data>
</node>
<node id="263">
  <data key="d0">Eggs</data>
  <data key="d1">Dithmarschen</data>
  <data key="d2">Store_EdekaRheinRuhr</data>
  <data key="d3">1051</data>
  <data key="d6">0.0</data>
  <data key="d4">0.0</data>
</node>
<node id="264">
  <data key="d0">Eggs</data>
  <data key="d1">Dithmarschen</data>
  <data key="d2">Warehouse_EdekaSuedbayern</data>
  <data key="d3">1051</data>
  <data key="d6">0.0</data>
  <data key="d4">0.0</data>
</node>
<node id="265">
  <data key="d0">Eggs</data>
  <data key="d1">Dithmarschen</data>
  <data key="d2">Store_EdekaSuedbayern</data>
  <data key="d3">1051</data>
  <data key="d6">0.0</data>
  <data key="d4">0.0</data>
</node>
<node id="266">
  <data key="d0">Eggs</data>
  <data key="d1">Dithmarschen</data>
  <data key="d2">Warehouse_EdekaSuedwest</data>
  <data key="d3">1051</data>
  <data key="d6">0.0</data>
  <data key="d4">0.0</data>
</node>
<node id="267">
  <data key="d0">Eggs</data>
  <data key="d1">Dithmarschen</data>
  <data key="d2">Store_EdekaSuedwest</data>
  <data key="d3">1051</data>
  <data key="d6">0.0</data>
  <data key="d4">0.0</data>
</node>
<node id="268">
  <data key="d0">Eggs</data>
  <data key="d1">Dithmarschen</data>
  <data key="d2">Warehouse_Globus</data>
  <data key="d3">1051</data>
  <data key="d6">0.0</data>
  <data key="d4">0.0</data>
</node>
<node id="269">
  <data key="d0">Eggs</data>
  <data key="d1">Dithmarschen</data>
  <data key="d2">Store_Globus</data>
  <data key="d3">1051</data>
  <data key="d6">0.0</data>
  <data key="d4">0.0</data>
</node>
<node id="270">
  <data key="d0">Eggs</data>
  <data key="d1">Dithmarschen</data>
  <data key="d2">Warehouse_Kaes</data>
  <data key="d3">1051</data>
  <data key="d6">0.0</data>
  <data key="d4">0.0</data>
</node>
<node id="271">
  <data key="d0">Eggs</data>
  <data key="d1">Dithmarschen</data>
  <data key="d2">Store_Kaes</data>
  <data key="d3">1051</data>
  <data key="d6">0.0</data>
  <data key="d4">0.0</data>
</node>
<node id="272">
  <data key="d0">Eggs</data>
  <data key="d1">Dithmarschen</data>
  <data key="d2">Warehouse_KaisersTengelmann</data>
  <data key="d3">1051</data>
  <data key="d6">0.0</data>
  <data key="d4">0.0</data>
</node>
<node id="273">
  <data key="d0">Eggs</data>
  <data key="d1">Dithmarschen</data>
  <data key="d2">Store_KaisersTengelmann</data>
  <data key="d3">1051</data>
  <data key="d6">0.0</data>
  <data key="d4">0.0</data>
</node>
<node id="274">
  <data key="d0">Eggs</data>
  <data key="d1">Dithmarschen</data>
  <data key="d2">Warehouse_Kaufland</data>
  <data key="d3">1051</data>
  <data key="d6">0.0</data>
  <data key="d4">0.0</data>
</node>
<node id="275">
  <data key="d0">Eggs</data>
  <data key="d1">Dithmarschen</data>
  <data key="d2">Store_Kaufland</data>
  <data key="d3">1051</data>
  <data key="d6">0.0</data>
  <data key="d4">0.0</data>
</node>
<node id="276">
  <data key="d0">Eggs</data>
  <data key="d1">Dithmarschen</data>
  <data key="d2">Warehouse_KlaasKock</data>
  <data key="d3">1051</data>
  <data key="d6">0.0</data>
  <data key="d4">0.0</data>
</node>
<node id="277">
  <data key="d0">Eggs</data>
  <data key="d1">Dithmarschen</data>
  <data key="d2">Store_KlaasKock</data>
  <data key="d3">1051</data>
  <data key="d6">0.0</data>
  <data key="d4">0.0</data>
</node>
<node id="278">
  <data key="d0">Eggs</data>
  <data key="d1">Dithmarschen</data>
  <data key="d2">Warehouse_Lidl</data>
  <data key="d3">1051</data>
  <data key="d6">0.0</data>
  <data key="d4">0.0</data>
</node>
<node id="279">
  <data key="d0">Eggs</data>
  <data key="d1">Dithmarschen</data>
  <data key="d2">Store_Lidl</data>
  <data key="d3">1051</data>
  <data key="d6">136.57465260364734</data>
  <data key="d4">136.57465260364734</data>
</node>
<node id="280">
  <data key="d0">Eggs</data>
  <data key="d1">Dithmarschen</data>
  <data key="d2">Warehouse_Netto</data>
  <data key="d3">1051</data>
  <data key="d6">0.0</data>
  <data key="d4">0.0</data>
</node>
<node id="281">
  <data key="d0">Eggs</data>
  <data key="d1">Dithmarschen</data>
  <data key="d2">Store_Netto</data>
  <data key="d3">1051</data>
  <data key="d6">46.42055695687063</data>
  <data key="d4">46.42055695687063</data>
</node>
<node id="282">
  <data key="d0">Eggs</data>
  <data key="d1">Dithmarschen</data>
  <data key="d2">Warehouse_NettoNord</data>
  <data key="d3">1051</data>
  <data key="d6">0.0</data>
  <data key="d4">0.0</data>
</node>
<node id="283">
  <data key="d0">Eggs</data>
  <data key="d1">Dithmarschen</data>
  <data key="d2">Store_NettoNord</data>
  <data key="d3">1051</data>
  <data key="d6">0.0</data>
  <data key="d4">0.0</data>
</node>
<node id="284">
  <data key="d0">Eggs</data>
  <data key="d1">Dithmarschen</data>
  <data key="d2">Warehouse_Norma</data>
  <data key="d3">1051</data>
  <data key="d6">0.0</data>
  <data key="d4">0.0</data>
</node>
<node id="285">
  <data key="d0">Eggs</data>
  <data key="d1">Dithmarschen</data>
  <data key="d2">Store_Norma</data>
  <data key="d3">1051</data>
  <data key="d6">0.0</data>
  <data key="d4">0.0</data>
</node>
<node id="286">
  <data key="d0">Eggs</data>
  <data key="d1">Dithmarschen</data>
  <data key="d2">Warehouse_Penny</data>
  <data key="d3">1051</data>
  <data key="d6">0.0</data>
  <data key="d4">0.0</data>
</node>
<node id="287">
  <data key="d0">Eggs</data>
  <data key="d1">Dithmarschen</data>
  <data key="d2">Store_Penny</data>
  <data key="d3">1051</data>
  <data key="d6">41.262717294996115</data>
  <data key="d4">41.262717294996115</data>
</node>
<node id="288">
  <data key="d0">Eggs</data>
  <data key="d1">Dithmarschen</data>
  <data key="d2">Warehouse_Real</data>
  <data key="d3">1051</data>
  <data key="d6">0.0</data>
  <data key="d4">0.0</data>
</node>
<node id="289">
  <data key="d0">Eggs</data>
  <data key="d1">Dithmarschen</data>
  <data key="d2">Store_Real</data>
  <data key="d3">1051</data>
  <data key="d6">0.0</data>
  <data key="d4">0.0</data>
</node>
<node id="290">
  <data key="d0">Eggs</data>
  <data key="d1">Dithmarschen</data>
  <data key="d2">Warehouse_ReweHit</data>
  <data key="d3">1051</data>
  <data key="d6">0.0</data>
  <data key="d4">0.0</data>
</node>
<node id="291">
  <data key="d0">Eggs</data>
  <data key="d1">Dithmarschen</data>
  <data key="d2">Store_ReweHit</data>
  <data key="d3">1051</data>
  <data key="d6">0.0</data>
  <data key="d4">0.0</data>
</node>
<node id="292">
  <data key="d0">Eggs</data>
  <data key="d1">Dithmarschen</data>
  <data key="d2">Warehouse_Tegut</data>
  <data key="d3">1051</data>
  <data key="d6">0.0</data>
  <data key="d4">0.0</data>
</node>
<node id="293">
  <data key="d0">Eggs</data>
  <data key="d1">Dithmarschen</data>
  <data key="d2">Store_Tegut</data>
  <data key="d3">1051</data>
  <data key="d6">0.0</data>
  <data key="d4">0.0</data>
</node>
<node id="294">
  <data key="d0">Eggs</data>
  <data key="d1">Dithmarschen</data>
  <data key="d2">Warehouse_Wasgau</data>
  <data key="d3">1051</data>
  <data key="d6">0.0</data>
  <data key="d4">0.0</data>
</node>
<node id="295">
  <data key="d0">Eggs</data>
  <data key="d1">Dithmarschen</data>
  <data key="d2">Store_Wasgau</data>
  <data key="d3">1051</data>
  <data key="d6">0.0</data>
  <data key="d4">0.0</data>
</node>
<node id="296">
  <data key="d0">Eggs</data>
  <data key="d1">Herzogtum Lauenburg</data>
  <data key="d2">Producer</data>
  <data key="d3">1053</data>
  <data key="d4">566.1420964975634</data>
</node>
<node id="297">
  <data key="d0">Eggs</data>
  <data key="d1">Herzogtum Lauenburg</data>
  <data key="d2">Consumer</data>
  <data key="d3">1053</data>
  <data key="d5">1752.4849750531976</data>
</node>
<node id="298">
  <data key="d0">Eggs</data>
  <data key="d1">Herzogtum Lauenburg</data>
  <data key="d2">Wholesale</data>
  <data key="d3">1053</data>
  <data key="d6">289.1600208837776</data>
  <data key="d4">289.1600208837776</data>
</node>
<node id="299">
  <data key="d0">Eggs</data>
  <data key="d1">Herzogtum Lauenburg</data>
  <data key="d2">Warehouse_AldiNord</data>
  <data key="d3">1053</data>
  <data key="d6">0.0</data>
  <data key="d4">0.0</data>
</node>
<node id="300">
  <data key="d0">Eggs</data>
  <data key="d1">Herzogtum Lauenburg</data>
  <data key="d2">Store_AldiNord</data>
  <data key="d3">1053</data>
  <data key="d6">261.79587646018547</data>
  <data key="d4">261.79587646018547</data>
</node>
<node id="301">
  <data key="d0">Eggs</data>
  <data key="d1">Herzogtum Lauenburg</data>
  <data key="d2">Warehouse_AldiSued</data>
  <data key="d3">1053</data>
  <data key="d6">0.0</data>
  <data key="d4">0.0</data>
</node>
<node id="302">
  <data key="d0">Eggs</data>
  <data key="d1">Herzogtum Lauenburg</data>
  <data key="d2">Store_AldiSued</data>
  <data key="d3">1053</data>
  <data key="d6">0.0</data>
  <data key="d4">0.0</data>
</node>
<node id="303">
  <data key="d0">Eggs</data>
  <data key="d1">Herzogtum Lauenburg</data>
  <data key="d2">Warehouse_Alnatura</data>
  <data key="d3">1053</data>
  <data key="d6">0.0</data>
  <data key="d4">0.0</data>
</node>
<node id="304">
  <data key="d0">Eggs</data>
  <data key="d1">Herzogtum Lauenburg</data>
  <data key="d2">Store_Alnatura</data>
  <data key="d3">1053</data>
  <data key="d6">0.0</data>
  <data key="d4">0.0</data>
</node>
<node id="305">
  <data key="d0">Eggs</data>
  <data key="d1">Herzogtum Lauenburg</data>
  <data key="d2">Warehouse_BartelsLangness</data>
  <data key="d3">1053</data>
  <data key="d6">0.0</data>
  <data key="d4">0.0</data>
</node>
<node id="306">
  <data key="d0">Eggs</data>
  <data key="d1">Herzogtum Lauenburg</data>
  <data key="d2">Store_BartelsLangness</data>
  <data key="d3">1053</data>
  <data key="d6">280.2178501750479</data>
  <data key="d4">280.2178501750479</data>
</node>
<node id="307">
  <data key="d0">Eggs</data>
  <data key="d1">Herzogtum Lauenburg</data>
  <data key="d2">Warehouse_Buenting</data>
  <data key="d3">1053</data>
  <data key="d6">0.0</data>
  <data key="d4">0.0</data>
</node>
<node id="308">
  <data key="d0">Eggs</data>
  <data key="d1">Herzogtum Lauenburg</data>
  <data key="d2">Store_Buenting</data>
  <data key="d3">1053</data>
  <data key="d6">0.0</data>
  <data key="d4">0.0</data>
</node>
<node id="309">
  <data key="d0">Eggs</data>
  <data key="d1">Herzogtum Lauenburg</data>
  <data key="d2">Warehouse_Coop</data>
  <data key="d3">1053</data>
  <data key="d6">0.0</data>
  <data key="d4">0.0</data>
</node>
<node id="310">
  <data key="d0">Eggs</data>
  <data key="d1">Herzogtum Lauenburg</data>
  <data key="d2">Store_Coop</data>
  <data key="d3">1053</data>
  <data key="d6">49.527929331761115</data>
  <data key="d4">49.527929331761115</data>
</node>
<node id="311">
  <data key="d0">Eggs</data>
  <data key="d1">Herzogtum Lauenburg</data>
  <data key="d2">Warehouse_Dennree</data>
  <data key="d3">1053</data>
  <data key="d6">0.0</data>
  <data key="d4">0.0</data>
</node>
<node id="312">
  <data key="d0">Eggs</data>
  <data key="d1">Herzogtum Lauenburg</data>
  <data key="d2">Store_Dennree</data>
  <data key="d3">1053</data>
  <data key="d6">2.415996552768835</data>
  <data key="d4">2.415996552768835</data>
</node>
<node id="313">
  <data key="d0">Eggs</data>
  <data key="d1">Herzogtum Lauenburg</data>
  <data key="d2">Warehouse_EdekaHessenring</data>
  <data key="d3">1053</data>
  <data key="d6">0.0</data>
  <data key="d4">0.0</data>
</node>
<node id="314">
  <data key="d0">Eggs</data>
  <data key="d1">Herzogtum Lauenburg</data>
  <data key="d2">Store_EdekaHessenring</data>
  <data key="d3">1053</data>
  <data key="d6">0.0</data>
  <data key="d4">0.0</data>
</node>
<node id="315">
  <data key="d0">Eggs</data>
  <data key="d1">Herzogtum Lauenburg</data>
  <data key="d2">Warehouse_EdekaMindenHannover</data>
  <data key="d3">1053</data>
  <data key="d6">0.0</data>
  <data key="d4">0.0</data>
</node>
<node id="316">
  <data key="d0">Eggs</data>
  <data key="d1">Herzogtum Lauenburg</data>
  <data key="d2">Store_EdekaMindenHannover</data>
  <data key="d3">1053</data>
  <data key="d6">0.0</data>
  <data key="d4">0.0</data>
</node>
<node id="317">
  <data key="d0">Eggs</data>
  <data key="d1">Herzogtum Lauenburg</data>
  <data key="d2">Warehouse_EdekaNord</data>
  <data key="d3">1053</data>
  <data key="d6">0.0</data>
  <data key="d4">0.0</data>
</node>
<node id="318">
  <data key="d0">Eggs</data>
  <data key="d1">Herzogtum Lauenburg</data>
  <data key="d2">Store_EdekaNord</data>
  <data key="d3">1053</data>
  <data key="d6">339.0700162026511</data>
  <data key="d4">339.0700162026511</data>
</node>
<node id="319">
  <data key="d0">Eggs</data>
  <data key="d1">Herzogtum Lauenburg</data>
  <data key="d2">Warehouse_EdekaNordbayern</data>
  <data key="d3">1053</data>
  <data key="d6">0.0</data>
  <data key="d4">0.0</data>
</node>
<node id="320">
  <data key="d0">Eggs</data>
  <data key="d1">Herzogtum Lauenburg</data>
  <data key="d2">Store_EdekaNordbayern</data>
  <data key="d3">1053</data>
  <data key="d6">0.0</data>
  <data key="d4">0.0</data>
</node>
<node id="321">
  <data key="d0">Eggs</data>
  <data key="d1">Herzogtum Lauenburg</data>
  <data key="d2">Warehouse_EdekaRheinRuhr</data>
  <data key="d3">1053</data>
  <data key="d6">0.0</data>
  <data key="d4">0.0</data>
</node>
<node id="322">
  <data key="d0">Eggs</data>
  <data key="d1">Herzogtum Lauenburg</data>
  <data key="d2">Store_EdekaRheinRuhr</data>
  <data key="d3">1053</data>
  <data key="d6">0.0</data>
  <data key="d4">0.0</data>
</node>
<node id="323">
  <data key="d0">Eggs</data>
  <data key="d1">Herzogtum Lauenburg</data>
  <data key="d2">Warehouse_EdekaSuedbayern</data>
  <data key="d3">1053</data>
  <data key="d6">0.0</data>
  <data key="d4">0.0</data>
</node>
<node id="324">
  <data key="d0">Eggs</data>
  <data key="d1">Herzogtum Lauenburg</data>
  <data key="d2">Store_EdekaSuedbayern</data>
  <data key="d3">1053</data>
  <data key="d6">0.0</data>
  <data key="d4">0.0</data>
</node>
<node id="325">
  <data key="d0">Eggs</data>
  <data key="d1">Herzogtum Lauenburg</data>
  <data key="d2">Warehouse_EdekaSuedwest</data>
  <data key="d3">1053</data>
  <data key="d6">0.0</data>
  <data key="d4">0.0</data>
</node>
<node id="326">
  <data key="d0">Eggs</data>
  <data key="d1">Herzogtum Lauenburg</data>
  <data key="d2">Store_EdekaSuedwest</data>
  <data key="d3">1053</data>
  <data key="d6">0.0</data>
  <data key="d4">0.0</data>
</node>
<node id="327">
  <data key="d0">Eggs</data>
  <data key="d1">Herzogtum Lauenburg</data>
  <data key="d2">Warehouse_Globus</data>
  <data key="d3">1053</data>
  <data key="d6">0.0</data>
  <data key="d4">0.0</data>
</node>
<node id="328">
  <data key="d0">Eggs</data>
  <data key="d1">Herzogtum Lauenburg</data>
  <data key="d2">Store_Globus</data>
  <data key="d3">1053</data>
  <data key="d6">0.0</data>
  <data key="d4">0.0</data>
</node>
<node id="329">
  <data key="d0">Eggs</data>
  <data key="d1">Herzogtum Lauenburg</data>
  <data key="d2">Warehouse_Kaes</data>
  <data key="d3">1053</data>
  <data key="d6">0.0</data>
  <data key="d4">0.0</data>
</node>
<node id="330">
  <data key="d0">Eggs</data>
  <data key="d1">Herzogtum Lauenburg</data>
  <data key="d2">Store_Kaes</data>
  <data key="d3">1053</data>
  <data key="d6">0.0</data>
  <data key="d4">0.0</data>
</node>
<node id="331">
  <data key="d0">Eggs</data>
  <data key="d1">Herzogtum Lauenburg</data>
  <data key="d2">Warehouse_KaisersTengelmann</data>
  <data key="d3">1053</data>
  <data key="d6">0.0</data>
  <data key="d4">0.0</data>
</node>
<node id="332">
  <data key="d0">Eggs</data>
  <data key="d1">Herzogtum Lauenburg</data>
  <data key="d2">Store_KaisersTengelmann</data>
  <data key="d3">1053</data>
  <data key="d6">0.0</data>
  <data key="d4">0.0</data>
</node>
<node id="333">
  <data key="d0">Eggs</data>
  <data key="d1">Herzogtum Lauenburg</data>
  <data key="d2">Warehouse_Kaufland</data>
  <data key="d3">1053</data>
  <data key="d6">0.0</data>
  <data key="d4">0.0</data>
</node>
<node id="334">
  <data key="d0">Eggs</data>
  <data key="d1">Herzogtum Lauenburg</data>
  <data key="d2">Store_Kaufland</data>
  <data key="d3">1053</data>
  <data key="d6">0.0</data>
  <data key="d4">0.0</data>
</node>
<node id="335">
  <data key="d0">Eggs</data>
  <data key="d1">Herzogtum Lauenburg</data>
  <data key="d2">Warehouse_KlaasKock</data>
  <data key="d3">1053</data>
  <data key="d6">0.0</data>
  <data key="d4">0.0</data>
</node>
<node id="336">
  <data key="d0">Eggs</data>
  <data key="d1">Herzogtum Lauenburg</data>
  <data key="d2">Store_KlaasKock</data>
  <data key="d3">1053</data>
  <data key="d6">0.0</data>
  <data key="d4">0.0</data>
</node>
<node id="337">
  <data key="d0">Eggs</data>
  <data key="d1">Herzogtum Lauenburg</data>
  <data key="d2">Warehouse_Lidl</data>
  <data key="d3">1053</data>
  <data key="d6">0.0</data>
  <data key="d4">0.0</data>
</node>
<node id="338">
  <data key="d0">Eggs</data>
  <data key="d1">Herzogtum Lauenburg</data>
  <data key="d2">Store_Lidl</data>
  <data key="d3">1053</data>
  <data key="d6">208.68170224540813</data>
  <data key="d4">208.68170224540813</data>
</node>
<node id="339">
  <data key="d0">Eggs</data>
  <data key="d1">Herzogtum Lauenburg</data>
  <data key="d2">Warehouse_Netto</data>
  <data key="d3">1053</data>
  <data key="d6">0.0</data>
  <data key="d4">0.0</data>
</node>
<node id="340">
  <data key="d0">Eggs</data>
  <data key="d1">Herzogtum Lauenburg</data>
  <data key="d2">Store_Netto</data>
  <data key="d3">1053</data>
  <data key="d6">22.68771762834484</data>
  <data key="d4">22.68771762834484</data>
</node>
<node id="341">
  <data key="d0">Eggs</data>
  <data key="d1">Herzogtum Lauenburg</data>
  <data key="d2">Warehouse_NettoNord</data>
  <data key="d3">1053</data>
  <data key="d6">0.0</data>
  <data key="d4">0.0</data>
</node>
<node id="342">
  <data key="d0">Eggs</data>
  <data key="d1">Herzogtum Lauenburg</data>
  <data key="d2">Store_NettoNord</data>
  <data key="d3">1053</data>
  <data key="d6">25.66996337316887</data>
  <data key="d4">25.66996337316887</data>
</node>
<node id="343">
  <data key="d0">Eggs</data>
  <data key="d1">Herzogtum Lauenburg</data>
  <data key="d2">Warehouse_Norma</data>
  <data key="d3">1053</data>
  <data key="d6">0.0</data>
  <data key="d4">0.0</data>
</node>
<node id="344">
  <data key="d0">Eggs</data>
  <data key="d1">Herzogtum Lauenburg</data>
  <data key="d2">Store_Norma</data>
  <data key="d3">1053</data>
  <data key="d6">25.36796380407277</data>
  <data key="d4">25.36796380407277</data>
</node>
<node id="345">
  <data key="d0">Eggs</data>
  <data key="d1">Herzogtum Lauenburg</data>
  <data key="d2">Warehouse_Penny</data>
  <data key="d3">1053</data>
  <data key="d6">0.0</data>
  <data key="d4">0.0</data>
</node>
<node id="346">
  <data key="d0">Eggs</data>
  <data key="d1">Herzogtum Lauenburg</data>
  <data key="d2">Store_Penny</data>
  <data key="d3">1053</data>
  <data key="d6">126.04707015148655</data>
  <data key="d4">126.04707015148655</data>
</node>
<node id="347">
  <data key="d0">Eggs</data>
  <data key="d1">Herzogtum Lauenburg</data>
  <data key="d2">Warehouse_Real</data>
  <data key="d3">1053</data>
  <data key="d6">0.0</data>
  <data key="d4">0.0</data>
</node>
<node id="348">
  <data key="d0">Eggs</data>
  <data key="d1">Herzogtum Lauenburg</data>
  <data key="d2">Store_Real</data>
  <data key="d3">1053</data>
  <data key="d6">0.0</data>
  <data key="d4">0.0</data>
</node>
<node id="349">
  <data key="d0">Eggs</data>
  <data key="d1">Herzogtum Lauenburg</data>
  <data key="d2">Warehouse_ReweHit</data>
  <data key="d3">1053</data>
  <data key="d6">0.0</data>
  <data key="d4">0.0</data>
</node>
<node id="350">
  <data key="d0">Eggs</data>
  <data key="d1">Herzogtum Lauenburg</data>
  <data key="d2">Store_ReweHit</data>
  <data key="d3">1053</data>
  <data key="d6">92.75161765864105</data>
  <data key="d4">92.75161765864105</data>
</node>
<node id="351">
  <data key="d0">Eggs</data>
  <data key="d1">Herzogtum Lauenburg</data>
  <data key="d2">Warehouse_Tegut</data>
  <data key="d3">1053</data>
  <data key="d6">0.0</data>
  <data key="d4">0.0</data>
</node>
<node id="352">
  <data key="d0">Eggs</data>
  <data key="d1">Herzogtum Lauenburg</data>
  <data key="d2">Store_Tegut</data>
  <data key="d3">1053</data>
  <data key="d6">0.0</data>
  <data key="d4">0.0</data>
</node>
<node id="353">
  <data key="d0">Eggs</data>
  <data key="d1">Herzogtum Lauenburg</data>
  <data key="d2">Warehouse_Wasgau</data>
  <data key="d3">1053</data>
  <data key="d6">0.0</data>
  <data key="d4">0.0</data>
</node>
<node id="354">
  <data key="d0">Eggs</data>
  <data key="d1">Herzogtum Lauenburg</data>
  <data key="d2">Store_Wasgau</data>
  <data key="d3">1053</data>
  <data key="d6">0.0</data>
  <data key="d4">0.0</data>
</node>
<node id="355">
  <data key="d0">Eggs</data>
  <data key="d1">Nordfriesland</data>
  <data key="d2">Producer</data>
  <data key="d3">1054</data>
  <data key="d4">647.8271116989532</data>
</node>
<node id="356">
  <data key="d0">Eggs</data>
  <data key="d1">Nordfriesland</data>
  <data key="d2">Consumer</data>
  <data key="d3">1054</data>
  <data key="d5">1513.0938766807994</data>
</node>
<node id="357">
  <data key="d0">Eggs</data>
  <data key="d1">Nordfriesland</data>
  <data key="d2">Wholesale</data>
  <data key="d3">1054</data>
  <data key="d6">249.66048965233188</data>
  <data key="d4">249.66048965233188</data>
</node>
<node id="358">
  <data key="d0">Eggs</data>
  <data key="d1">Nordfriesland</data>
  <data key="d2">Warehouse_AldiNord</data>
  <data key="d3">1054</data>
  <data key="d6">0.0</data>
  <data key="d4">0.0</data>
</node>
<node id="359">
  <data key="d0">Eggs</data>
  <data key="d1">Nordfriesland</data>
  <data key="d2">Store_AldiNord</data>
  <data key="d3">1054</data>
  <data key="d6">162.96348721178276</data>
  <data key="d4">162.96348721178276</data>
</node>
<node id="360">
  <data key="d0">Eggs</data>
  <data key="d1">Nordfriesland</data>
  <data key="d2">Warehouse_AldiSued</data>
  <data key="d3">1054</data>
  <data key="d6">0.0</data>
  <data key="d4">0.0</data>
</node>
<node id="361">
  <data key="d0">Eggs</data>
  <data key="d1">Nordfriesland</data>
  <data key="d2">Store_AldiSued</data>
  <data key="d3">1054</data>
  <data key="d6">0.0</data>
  <data key="d4">0.0</data>
</node>
<node id="362">
  <data key="d0">Eggs</data>
  <data key="d1">Nordfriesland</data>
  <data key="d2">Warehouse_Alnatura</data>
  <data key="d3">1054</data>
  <data key="d6">0.0</data>
  <data key="d4">0.0</data>
</node>
<node id="363">
  <data key="d0">Eggs</data>
  <data key="d1">Nordfriesland</data>
  <data key="d2">Store_Alnatura</data>
  <data key="d3">1054</data>
  <data key="d6">0.0</data>
  <data key="d4">0.0</data>
</node>
<node id="364">
  <data key="d0">Eggs</data>
  <data key="d1">Nordfriesland</data>
  <data key="d2">Warehouse_BartelsLangness</data>
  <data key="d3">1054</data>
  <data key="d6">0.0</data>
  <data key="d4">0.0</data>
</node>
<node id="365">
  <data key="d0">Eggs</data>
  <data key="d1">Nordfriesland</data>
  <data key="d2">Store_BartelsLangness</data>
  <data key="d3">1054</data>
  <data key="d6">165.5570037727861</data>
  <data key="d4">165.5570037727861</data>
</node>
<node id="366">
  <data key="d0">Eggs</data>
  <data key="d1">Nordfriesland</data>
  <data key="d2">Warehouse_Buenting</data>
  <data key="d3">1054</data>
  <data key="d6">0.0</data>
  <data key="d4">0.0</data>
</node>
<node id="367">
  <data key="d0">Eggs</data>
  <data key="d1">Nordfriesland</data>
  <data key="d2">Store_Buenting</data>
  <data key="d3">1054</data>
  <data key="d6">0.0</data>
  <data key="d4">0.0</data>
</node>
<node id="368">
  <data key="d0">Eggs</data>
  <data key="d1">Nordfriesland</data>
  <data key="d2">Warehouse_Coop</data>
  <data key="d3">1054</data>
  <data key="d6">0.0</data>
  <data key="d4">0.0</data>
</node>
<node id="369">
  <data key="d0">Eggs</data>
  <data key="d1">Nordfriesland</data>
  <data key="d2">Store_Coop</data>
  <data key="d3">1054</data>
  <data key="d6">303.46661740982785</data>
  <data key="d4">303.46661740982785</data>
</node>
<node id="370">
  <data key="d0">Eggs</data>
  <data key="d1">Nordfriesland</data>
  <data key="d2">Warehouse_Dennree</data>
  <data key="d3">1054</data>
  <data key="d6">0.0</data>
  <data key="d4">0.0</data>
</node>
<node id="371">
  <data key="d0">Eggs</data>
  <data key="d1">Nordfriesland</data>
  <data key="d2">Store_Dennree</data>
  <data key="d3">1054</data>
  <data key="d6">0.0</data>
  <data key="d4">0.0</data>
</node>
<node id="372">
  <data key="d0">Eggs</data>
  <data key="d1">Nordfriesland</data>
  <data key="d2">Warehouse_EdekaHessenring</data>
  <data key="d3">1054</data>
  <data key="d6">0.0</data>
  <data key="d4">0.0</data>
</node>
<node id="373">
  <data key="d0">Eggs</data>
  <data key="d1">Nordfriesland</data>
  <data key="d2">Store_EdekaHessenring</data>
  <data key="d3">1054</data>
  <data key="d6">0.0</data>
  <data key="d4">0.0</data>
</node>
<node id="374">
  <data key="d0">Eggs</data>
  <data key="d1">Nordfriesland</data>
  <data key="d2">Warehouse_EdekaMindenHannover</data>
  <data key="d3">1054</data>
  <data key="d6">0.0</data>
  <data key="d4">0.0</data>
</node>
<node id="375">
  <data key="d0">Eggs</data>
  <data key="d1">Nordfriesland</data>
  <data key="d2">Store_EdekaMindenHannover</data>
  <data key="d3">1054</data>
  <data key="d6">0.0</data>
  <data key="d4">0.0</data>
</node>
<node id="376">
  <data key="d0">Eggs</data>
  <data key="d1">Nordfriesland</data>
  <data key="d2">Warehouse_EdekaNord</data>
  <data key="d3">1054</data>
  <data key="d6">0.0</data>
  <data key="d4">0.0</data>
</node>
<node id="377">
  <data key="d0">Eggs</data>
  <data key="d1">Nordfriesland</data>
  <data key="d2">Store_EdekaNord</data>
  <data key="d3">1054</data>
  <data key="d6">356.7973754312363</data>
  <data key="d4">356.7973754312363</data>
</node>
<node id="378">
  <data key="d0">Eggs</data>
  <data key="d1">Nordfriesland</data>
  <data key="d2">Warehouse_EdekaNordbayern</data>
  <data key="d3">1054</data>
  <data key="d6">0.0</data>
  <data key="d4">0.0</data>
</node>
<node id="379">
  <data key="d0">Eggs</data>
  <data key="d1">Nordfriesland</data>
  <data key="d2">Store_EdekaNordbayern</data>
  <data key="d3">1054</data>
  <data key="d6">0.0</data>
  <data key="d4">0.0</data>
</node>
<node id="380">
  <data key="d0">Eggs</data>
  <data key="d1">Nordfriesland</data>
  <data key="d2">Warehouse_EdekaRheinRuhr</data>
  <data key="d3">1054</data>
  <data key="d6">0.0</data>
  <data key="d4">0.0</data>
</node>
<node id="381">
  <data key="d0">Eggs</data>
  <data key="d1">Nordfriesland</data>
  <data key="d2">Store_EdekaRheinRuhr</data>
  <data key="d3">1054</data>
  <data key="d6">0.0</data>
  <data key="d4">0.0</data>
</node>
<node id="382">
  <data key="d0">Eggs</data>
  <data key="d1">Nordfriesland</data>
  <data key="d2">Warehouse_EdekaSuedbayern</data>
  <data key="d3">1054</data>
  <data key="d6">0.0</data>
  <data key="d4">0.0</data>
</node>
<node id="383">
  <data key="d0">Eggs</data>
  <data key="d1">Nordfriesland</data>
  <data key="d2">Store_EdekaSuedbayern</data>
  <data key="d3">1054</data>
  <data key="d6">0.0</data>
  <data key="d4">0.0</data>
</node>
<node id="384">
  <data key="d0">Eggs</data>
  <data key="d1">Nordfriesland</data>
  <data key="d2">Warehouse_EdekaSuedwest</data>
  <data key="d3">1054</data>
  <data key="d6">0.0</data>
  <data key="d4">0.0</data>
</node>
<node id="385">
  <data key="d0">Eggs</data>
  <data key="d1">Nordfriesland</data>
  <data key="d2">Store_EdekaSuedwest</data>
  <data key="d3">1054</data>
  <data key="d6">0.0</data>
  <data key="d4">0.0</data>
</node>
<node id="386">
  <data key="d0">Eggs</data>
  <data key="d1">Nordfriesland</data>
  <data key="d2">Warehouse_Globus</data>
  <data key="d3">1054</data>
  <data key="d6">0.0</data>
  <data key="d4">0.0</data>
</node>
<node id="387">
  <data key="d0">Eggs</data>
  <data key="d1">Nordfriesland</data>
  <data key="d2">Store_Globus</data>
  <data key="d3">1054</data>
  <data key="d6">0.0</data>
  <data key="d4">0.0</data>
</node>
<node id="388">
  <data key="d0">Eggs</data>
  <data key="d1">Nordfriesland</data>
  <data key="d2">Warehouse_Kaes</data>
  <data key="d3">1054</data>
  <data key="d6">0.0</data>
  <data key="d4">0.0</data>
</node>
<node id="389">
  <data key="d0">Eggs</data>
  <data key="d1">Nordfriesland</data>
  <data key="d2">Store_Kaes</data>
  <data key="d3">1054</data>
  <data key="d6">0.0</data>
  <data key="d4">0.0</data>
</node>
<node id="390">
  <data key="d0">Eggs</data>
  <data key="d1">Nordfriesland</data>
  <data key="d2">Warehouse_KaisersTengelmann</data>
  <data key="d3">1054</data>
  <data key="d6">0.0</data>
  <data key="d4">0.0</data>
</node>
<node id="391">
  <data key="d0">Eggs</data>
  <data key="d1">Nordfriesland</data>
  <data key="d2">Store_KaisersTengelmann</data>
  <data key="d3">1054</data>
  <data key="d6">0.0</data>
  <data key="d4">0.0</data>
</node>
<node id="392">
  <data key="d0">Eggs</data>
  <data key="d1">Nordfriesland</data>
  <data key="d2">Warehouse_Kaufland</data>
  <data key="d3">1054</data>
  <data key="d6">0.0</data>
  <data key="d4">0.0</data>
</node>
<node id="393">
  <data key="d0">Eggs</data>
  <data key="d1">Nordfriesland</data>
  <data key="d2">Store_Kaufland</data>
  <data key="d3">1054</data>
  <data key="d6">0.0</data>
  <data key="d4">0.0</data>
</node>
<node id="394">
  <data key="d0">Eggs</data>
  <data key="d1">Nordfriesland</data>
  <data key="d2">Warehouse_KlaasKock</data>
  <data key="d3">1054</data>
  <data key="d6">0.0</data>
  <data key="d4">0.0</data>
</node>
<node id="395">
  <data key="d0">Eggs</data>
  <data key="d1">Nordfriesland</data>
  <data key="d2">Store_KlaasKock</data>
  <data key="d3">1054</data>
  <data key="d6">0.0</data>
  <data key="d4">0.0</data>
</node>
<node id="396">
  <data key="d0">Eggs</data>
  <data key="d1">Nordfriesland</data>
  <data key="d2">Warehouse_Lidl</data>
  <data key="d3">1054</data>
  <data key="d6">0.0</data>
  <data key="d4">0.0</data>
</node>
<node id="397">
  <data key="d0">Eggs</data>
  <data key="d1">Nordfriesland</data>
  <data key="d2">Store_Lidl</data>
  <data key="d3">1054</data>
  <data key="d6">153.11819618894484</data>
  <data key="d4">153.11819618894484</data>
</node>
<node id="398">
  <data key="d0">Eggs</data>
  <data key="d1">Nordfriesland</data>
  <data key="d2">Warehouse_Netto</data>
  <data key="d3">1054</data>
  <data key="d6">0.0</data>
  <data key="d4">0.0</data>
</node>
<node id="399">
  <data key="d0">Eggs</data>
  <data key="d1">Nordfriesland</data>
  <data key="d2">Store_Netto</data>
  <data key="d3">1054</data>
  <data key="d6">45.399129703776936</data>
  <data key="d4">45.399129703776936</data>
</node>
<node id="400">
  <data key="d0">Eggs</data>
  <data key="d1">Nordfriesland</data>
  <data key="d2">Warehouse_NettoNord</data>
  <data key="d3">1054</data>
  <data key="d6">0.0</data>
  <data key="d4">0.0</data>
</node>
<node id="401">
  <data key="d0">Eggs</data>
  <data key="d1">Nordfriesland</data>
  <data key="d2">Store_NettoNord</data>
  <data key="d3">1054</data>
  <data key="d6">0.0</data>
  <data key="d4">0.0</data>
</node>
<node id="402">
  <data key="d0">Eggs</data>
  <data key="d1">Nordfriesland</data>
  <data key="d2">Warehouse_Norma</data>
  <data key="d3">1054</data>
  <data key="d6">0.0</data>
  <data key="d4">0.0</data>
</node>
<node id="403">
  <data key="d0">Eggs</data>
  <data key="d1">Nordfriesland</data>
  <data key="d2">Store_Norma</data>
  <data key="d3">1054</data>
  <data key="d6">0.0</data>
  <data key="d4">0.0</data>
</node>
<node id="404">
  <data key="d0">Eggs</data>
  <data key="d1">Nordfriesland</data>
  <data key="d2">Warehouse_Penny</data>
  <data key="d3">1054</data>
  <data key="d6">0.0</data>
  <data key="d4">0.0</data>
</node>
<node id="405">
  <data key="d0">Eggs</data>
  <data key="d1">Nordfriesland</data>
  <data key="d2">Store_Penny</data>
  <data key="d3">1054</data>
  <data key="d6">33.64017597573266</data>
  <data key="d4">33.64017597573266</data>
</node>
<node id="406">
  <data key="d0">Eggs</data>
  <data key="d1">Nordfriesland</data>
  <data key="d2">Warehouse_Real</data>
  <data key="d3">1054</data>
  <data key="d6">0.0</data>
  <data key="d4">0.0</data>
</node>
<node id="407">
  <data key="d0">Eggs</data>
  <data key="d1">Nordfriesland</data>
  <data key="d2">Store_Real</data>
  <data key="d3">1054</data>
  <data key="d6">0.0</data>
  <data key="d4">0.0</data>
</node>
<node id="408">
  <data key="d0">Eggs</data>
  <data key="d1">Nordfriesland</data>
  <data key="d2">Warehouse_ReweHit</data>
  <data key="d3">1054</data>
  <data key="d6">0.0</data>
  <data key="d4">0.0</data>
</node>
<node id="409">
  <data key="d0">Eggs</data>
  <data key="d1">Nordfriesland</data>
  <data key="d2">Store_ReweHit</data>
  <data key="d3">1054</data>
  <data key="d6">17.37404298147869</data>
  <data key="d4">17.37404298147869</data>
</node>
<node id="410">
  <data key="d0">Eggs</data>
  <data key="d1">Nordfriesland</data>
  <data key="d2">Warehouse_Tegut</data>
  <data key="d3">1054</data>
  <data key="d6">0.0</data>
  <data key="d4">0.0</data>
</node>
<node id="411">
  <data key="d0">Eggs</data>
  <data key="d1">Nordfriesland</data>
  <data key="d2">Store_Tegut</data>
  <data key="d3">1054</data>
  <data key="d6">0.0</data>
  <data key="d4">0.0</data>
</node>
<node id="412">
  <data key="d0">Eggs</data>
  <data key="d1">Nordfriesland</data>
  <data key="d2">Warehouse_Wasgau</data>
  <data key="d3">1054</data>
  <data key="d6">0.0</data>
  <data key="d4">0.0</data>
</node>
<node id="413">
  <data key="d0">Eggs</data>
  <data key="d1">Nordfriesland</data>
  <data key="d2">Store_Wasgau</data>
  <data key="d3">1054</data>
  <data key="d6">0.0</data>
  <data key="d4">0.0</data>
</node>
<node id="414">
  <data key="d0">Eggs</data>
  <data key="d1">Ostholstein</data>
  <data key="d2">Producer</data>
  <data key="d3">1055</data>
  <data key="d4">4505.624945287004</data>
</node>
<node id="415">
  <data key="d0">Eggs</data>
  <data key="d1">Ostholstein</data>
  <data key="d2">Consumer</data>
  <data key="d3">1055</data>
  <data key="d5">1845.5348811020292</data>
</node>
<node id="416">
  <data key="d0">Eggs</data>
  <data key="d1">Ostholstein</data>
  <data key="d2">Wholesale</data>
  <data key="d3">1055</data>
  <data key="d6">304.5132553818348</data>
  <data key="d4">304.5132553818348</data>
</node>
<node id="417">
  <data key="d0">Eggs</data>
  <data key="d1">Ostholstein</data>
  <data key="d2">Warehouse_AldiNord</data>
  <data key="d3">1055</data>
  <data key="d6">892.0161303683147</data>
  <data key="d4">892.0161303683147</data>
</node>
<node id="418">
  <data key="d0">Eggs</data>
  <data key="d1">Ostholstein</data>
  <data key="d2">Store_AldiNord</data>
  <data key="d3">1055</data>
  <data key="d6">289.7619672530164</data>
  <data key="d4">289.7619672530164</data>
</node>
<node id="419">
  <data key="d0">Eggs</data>
  <data key="d1">Ostholstein</data>
  <data key="d2">Warehouse_AldiSued</data>
  <data key="d3">1055</data>
  <data key="d6">0.0</data>
  <data key="d4">0.0</data>
</node>
<node id="420">
  <data key="d0">Eggs</data>
  <data key="d1">Ostholstein</data>
  <data key="d2">Store_AldiSued</data>
  <data key="d3">1055</data>
  <data key="d6">0.0</data>
  <data key="d4">0.0</data>
</node>
<node id="421">
  <data key="d0">Eggs</data>
  <data key="d1">Ostholstein</data>
  <data key="d2">Warehouse_Alnatura</data>
  <data key="d3">1055</data>
  <data key="d6">0.0</data>
  <data key="d4">0.0</data>
</node>
<node id="422">
  <data key="d0">Eggs</data>
  <data key="d1">Ostholstein</data>
  <data key="d2">Store_Alnatura</data>
  <data key="d3">1055</data>
  <data key="d6">0.0</data>
  <data key="d4">0.0</data>
</node>
<node id="423">
  <data key="d0">Eggs</data>
  <data key="d1">Ostholstein</data>
  <data key="d2">Warehouse_BartelsLangness</data>
  <data key="d3">1055</data>
  <data key="d6">0.0</data>
  <data key="d4">0.0</data>
</node>
<node id="424">
  <data key="d0">Eggs</data>
  <data key="d1">Ostholstein</data>
  <data key="d2">Store_BartelsLangness</data>
  <data key="d3">1055</data>
  <data key="d6">286.6279533921216</data>
  <data key="d4">286.6279533921216</data>
</node>
<node id="425">
  <data key="d0">Eggs</data>
  <data key="d1">Ostholstein</data>
  <data key="d2">Warehouse_Buenting</data>
  <data key="d3">1055</data>
  <data key="d6">0.0</data>
  <data key="d4">0.0</data>
</node>
<node id="426">
  <data key="d0">Eggs</data>
  <data key="d1">Ostholstein</data>
  <data key="d2">Store_Buenting</data>
  <data key="d3">1055</data>
  <data key="d6">0.0</data>
  <data key="d4">0.0</data>
</node>
<node id="427">
  <data key="d0">Eggs</data>
  <data key="d1">Ostholstein</data>
  <data key="d2">Warehouse_Coop</data>
  <data key="d3">1055</data>
  <data key="d6">0.0</data>
  <data key="d4">0.0</data>
</node>
<node id="428">
  <data key="d0">Eggs</data>
  <data key="d1">Ostholstein</data>
  <data key="d2">Store_Coop</data>
  <data key="d3">1055</data>
  <data key="d6">187.6826586410143</data>
  <data key="d4">187.6826586410143</data>
</node>
<node id="429">
  <data key="d0">Eggs</data>
  <data key="d1">Ostholstein</data>
  <data key="d2">Warehouse_Dennree</data>
  <data key="d3">1055</data>
  <data key="d6">0.0</data>
  <data key="d4">0.0</data>
</node>
<node id="430">
  <data key="d0">Eggs</data>
  <data key="d1">Ostholstein</data>
  <data key="d2">Store_Dennree</data>
  <data key="d3">1055</data>
  <data key="d6">0.0</data>
  <data key="d4">0.0</data>
</node>
<node id="431">
  <data key="d0">Eggs</data>
  <data key="d1">Ostholstein</data>
  <data key="d2">Warehouse_EdekaHessenring</data>
  <data key="d3">1055</data>
  <data key="d6">0.0</data>
  <data key="d4">0.0</data>
</node>
<node id="432">
  <data key="d0">Eggs</data>
  <data key="d1">Ostholstein</data>
  <data key="d2">Store_EdekaHessenring</data>
  <data key="d3">1055</data>
  <data key="d6">0.0</data>
  <data key="d4">0.0</data>
</node>
<node id="433">
  <data key="d0">Eggs</data>
  <data key="d1">Ostholstein</data>
  <data key="d2">Warehouse_EdekaMindenHannover</data>
  <data key="d3">1055</data>
  <data key="d6">0.0</data>
  <data key="d4">0.0</data>
</node>
<node id="434">
  <data key="d0">Eggs</data>
  <data key="d1">Ostholstein</data>
  <data key="d2">Store_EdekaMindenHannover</data>
  <data key="d3">1055</data>
  <data key="d6">0.0</data>
  <data key="d4">0.0</data>
</node>
<node id="435">
  <data key="d0">Eggs</data>
  <data key="d1">Ostholstein</data>
  <data key="d2">Warehouse_EdekaNord</data>
  <data key="d3">1055</data>
  <data key="d6">0.0</data>
  <data key="d4">0.0</data>
</node>
<node id="436">
  <data key="d0">Eggs</data>
  <data key="d1">Ostholstein</data>
  <data key="d2">Store_EdekaNord</data>
  <data key="d3">1055</data>
  <data key="d6">258.8695449099105</data>
  <data key="d4">258.8695449099105</data>
</node>
<node id="437">
  <data key="d0">Eggs</data>
  <data key="d1">Ostholstein</data>
  <data key="d2">Warehouse_EdekaNordbayern</data>
  <data key="d3">1055</data>
  <data key="d6">0.0</data>
  <data key="d4">0.0</data>
</node>
<node id="438">
  <data key="d0">Eggs</data>
  <data key="d1">Ostholstein</data>
  <data key="d2">Store_EdekaNordbayern</data>
  <data key="d3">1055</data>
  <data key="d6">0.0</data>
  <data key="d4">0.0</data>
</node>
<node id="439">
  <data key="d0">Eggs</data>
  <data key="d1">Ostholstein</data>
  <data key="d2">Warehouse_EdekaRheinRuhr</data>
  <data key="d3">1055</data>
  <data key="d6">0.0</data>
  <data key="d4">0.0</data>
</node>
<node id="440">
  <data key="d0">Eggs</data>
  <data key="d1">Ostholstein</data>
  <data key="d2">Store_EdekaRheinRuhr</data>
  <data key="d3">1055</data>
  <data key="d6">0.0</data>
  <data key="d4">0.0</data>
</node>
<node id="441">
  <data key="d0">Eggs</data>
  <data key="d1">Ostholstein</data>
  <data key="d2">Warehouse_EdekaSuedbayern</data>
  <data key="d3">1055</data>
  <data key="d6">0.0</data>
  <data key="d4">0.0</data>
</node>
<node id="442">
  <data key="d0">Eggs</data>
  <data key="d1">Ostholstein</data>
  <data key="d2">Store_EdekaSuedbayern</data>
  <data key="d3">1055</data>
  <data key="d6">0.0</data>
  <data key="d4">0.0</data>
</node>
<node id="443">
  <data key="d0">Eggs</data>
  <data key="d1">Ostholstein</data>
  <data key="d2">Warehouse_EdekaSuedwest</data>
  <data key="d3">1055</data>
  <data key="d6">0.0</data>
  <data key="d4">0.0</data>
</node>
<node id="444">
  <data key="d0">Eggs</data>
  <data key="d1">Ostholstein</data>
  <data key="d2">Store_EdekaSuedwest</data>
  <data key="d3">1055</data>
  <data key="d6">0.0</data>
  <data key="d4">0.0</data>
</node>
<node id="445">
  <data key="d0">Eggs</data>
  <data key="d1">Ostholstein</data>
  <data key="d2">Warehouse_Globus</data>
  <data key="d3">1055</data>
  <data key="d6">0.0</data>
  <data key="d4">0.0</data>
</node>
<node id="446">
  <data key="d0">Eggs</data>
  <data key="d1">Ostholstein</data>
  <data key="d2">Store_Globus</data>
  <data key="d3">1055</data>
  <data key="d6">0.0</data>
  <data key="d4">0.0</data>
</node>
<node id="447">
  <data key="d0">Eggs</data>
  <data key="d1">Ostholstein</data>
  <data key="d2">Warehouse_Kaes</data>
  <data key="d3">1055</data>
  <data key="d6">0.0</data>
  <data key="d4">0.0</data>
</node>
<node id="448">
  <data key="d0">Eggs</data>
  <data key="d1">Ostholstein</data>
  <data key="d2">Store_Kaes</data>
  <data key="d3">1055</data>
  <data key="d6">0.0</data>
  <data key="d4">0.0</data>
</node>
<node id="449">
  <data key="d0">Eggs</data>
  <data key="d1">Ostholstein</data>
  <data key="d2">Warehouse_KaisersTengelmann</data>
  <data key="d3">1055</data>
  <data key="d6">0.0</data>
  <data key="d4">0.0</data>
</node>
<node id="450">
  <data key="d0">Eggs</data>
  <data key="d1">Ostholstein</data>
  <data key="d2">Store_KaisersTengelmann</data>
  <data key="d3">1055</data>
  <data key="d6">0.0</data>
  <data key="d4">0.0</data>
</node>
<node id="451">
  <data key="d0">Eggs</data>
  <data key="d1">Ostholstein</data>
  <data key="d2">Warehouse_Kaufland</data>
  <data key="d3">1055</data>
  <data key="d6">0.0</data>
  <data key="d4">0.0</data>
</node>
<node id="452">
  <data key="d0">Eggs</data>
  <data key="d1">Ostholstein</data>
  <data key="d2">Store_Kaufland</data>
  <data key="d3">1055</data>
  <data key="d6">0.0</data>
  <data key="d4">0.0</data>
</node>
<node id="453">
  <data key="d0">Eggs</data>
  <data key="d1">Ostholstein</data>
  <data key="d2">Warehouse_KlaasKock</data>
  <data key="d3">1055</data>
  <data key="d6">0.0</data>
  <data key="d4">0.0</data>
</node>
<node id="454">
  <data key="d0">Eggs</data>
  <data key="d1">Ostholstein</data>
  <data key="d2">Store_KlaasKock</data>
  <data key="d3">1055</data>
  <data key="d6">0.0</data>
  <data key="d4">0.0</data>
</node>
<node id="455">
  <data key="d0">Eggs</data>
  <data key="d1">Ostholstein</data>
  <data key="d2">Warehouse_Lidl</data>
  <data key="d3">1055</data>
  <data key="d6">0.0</data>
  <data key="d4">0.0</data>
</node>
<node id="456">
  <data key="d0">Eggs</data>
  <data key="d1">Ostholstein</data>
  <data key="d2">Store_Lidl</data>
  <data key="d3">1055</data>
  <data key="d6">148.49256150430122</data>
  <data key="d4">148.49256150430122</data>
</node>
<node id="457">
  <data key="d0">Eggs</data>
  <data key="d1">Ostholstein</data>
  <data key="d2">Warehouse_Netto</data>
  <data key="d3">1055</data>
  <data key="d6">0.0</data>
  <data key="d4">0.0</data>
</node>
<node id="458">
  <data key="d0">Eggs</data>
  <data key="d1">Ostholstein</data>
  <data key="d2">Store_Netto</data>
  <data key="d3">1055</data>
  <data key="d6">26.92267145263914</data>
  <data key="d4">26.92267145263914</data>
</node>
<node id="459">
  <data key="d0">Eggs</data>
  <data key="d1">Ostholstein</data>
  <data key="d2">Warehouse_NettoNord</data>
  <data key="d3">1055</data>
  <data key="d6">0.0</data>
  <data key="d4">0.0</data>
</node>
<node id="460">
  <data key="d0">Eggs</data>
  <data key="d1">Ostholstein</data>
  <data key="d2">Store_NettoNord</data>
  <data key="d3">1055</data>
  <data key="d6">40.563093685295556</data>
  <data key="d4">40.563093685295556</data>
</node>
<node id="461">
  <data key="d0">Eggs</data>
  <data key="d1">Ostholstein</data>
  <data key="d2">Warehouse_Norma</data>
  <data key="d3">1055</data>
  <data key="d6">0.0</data>
  <data key="d4">0.0</data>
</node>
<node id="462">
  <data key="d0">Eggs</data>
  <data key="d1">Ostholstein</data>
  <data key="d2">Store_Norma</data>
  <data key="d3">1055</data>
  <data key="d6">13.371792473151148</data>
  <data key="d4">13.371792473151148</data>
</node>
<node id="463">
  <data key="d0">Eggs</data>
  <data key="d1">Ostholstein</data>
  <data key="d2">Warehouse_Penny</data>
  <data key="d3">1055</data>
  <data key="d6">0.0</data>
  <data key="d4">0.0</data>
</node>
<node id="464">
  <data key="d0">Eggs</data>
  <data key="d1">Ostholstein</data>
  <data key="d2">Store_Penny</data>
  <data key="d3">1055</data>
  <data key="d6">119.5999384819568</data>
  <data key="d4">119.5999384819568</data>
</node>
<node id="465">
  <data key="d0">Eggs</data>
  <data key="d1">Ostholstein</data>
  <data key="d2">Warehouse_Real</data>
  <data key="d3">1055</data>
  <data key="d6">0.0</data>
  <data key="d4">0.0</data>
</node>
<node id="466">
  <data key="d0">Eggs</data>
  <data key="d1">Ostholstein</data>
  <data key="d2">Store_Real</data>
  <data key="d3">1055</data>
  <data key="d6">0.0</data>
  <data key="d4">0.0</data>
</node>
<node id="467">
  <data key="d0">Eggs</data>
  <data key="d1">Ostholstein</data>
  <data key="d2">Warehouse_ReweHit</data>
  <data key="d3">1055</data>
  <data key="d6">0.0</data>
  <data key="d4">0.0</data>
</node>
<node id="468">
  <data key="d0">Eggs</data>
  <data key="d1">Ostholstein</data>
  <data key="d2">Store_ReweHit</data>
  <data key="d3">1055</data>
  <data key="d6">138.49356490049402</data>
  <data key="d4">138.49356490049402</data>
</node>
<node id="469">
  <data key="d0">Eggs</data>
  <data key="d1">Ostholstein</data>
  <data key="d2">Warehouse_Tegut</data>
  <data key="d3">1055</data>
  <data key="d6">0.0</data>
  <data key="d4">0.0</data>
</node>
<node id="470">
  <data key="d0">Eggs</data>
  <data key="d1">Ostholstein</data>
  <data key="d2">Store_Tegut</data>
  <data key="d3">1055</data>
  <data key="d6">0.0</data>
  <data key="d4">0.0</data>
</node>
<node id="471">
  <data key="d0">Eggs</data>
  <data key="d1">Ostholstein</data>
  <data key="d2">Warehouse_Wasgau</data>
  <data key="d3">1055</data>
  <data key="d6">0.0</data>
  <data key="d4">0.0</data>
</node>
<node id="472">
  <data key="d0">Eggs</data>
  <data key="d1">Ostholstein</data>
  <data key="d2">Store_Wasgau</data>
  <data key="d3">1055</data>
  <data key="d6">0.0</data>
  <data key="d4">0.0</data>
</node>
<node id="473">
  <data key="d0">Eggs</data>
  <data key="d1">Pinneberg</data>
  <data key="d2">Producer</data>
  <data key="d3">1056</data>
  <data key="d4">442.9103925299495</data>
</node>
<node id="474">
  <data key="d0">Eggs</data>
  <data key="d1">Pinneberg</data>
  <data key="d2">Consumer</data>
  <data key="d3">1056</data>
  <data key="d5">2786.983183817603</data>
</node>
<node id="475">
  <data key="d0">Eggs</data>
  <data key="d1">Pinneberg</data>
  <data key="d2">Wholesale</data>
  <data key="d3">1056</data>
  <data key="d6">459.85222532990457</data>
  <data key="d4">459.85222532990457</data>
</node>
<node id="476">
  <data key="d0">Eggs</data>
  <data key="d1">Pinneberg</data>
  <data key="d2">Warehouse_AldiNord</data>
  <data key="d3">1056</data>
  <data key="d6">0.0</data>
  <data key="d4">0.0</data>
</node>
<node id="477">
  <data key="d0">Eggs</data>
  <data key="d1">Pinneberg</data>
  <data key="d2">Store_AldiNord</data>
  <data key="d3">1056</data>
  <data key="d6">386.03624161111503</data>
  <data key="d4">386.03624161111503</data>
</node>
<node id="478">
  <data key="d0">Eggs</data>
  <data key="d1">Pinneberg</data>
  <data key="d2">Warehouse_AldiSued</data>
  <data key="d3">1056</data>
  <data key="d6">0.0</data>
  <data key="d4">0.0</data>
</node>
<node id="479">
  <data key="d0">Eggs</data>
  <data key="d1">Pinneberg</data>
  <data key="d2">Store_AldiSued</data>
  <data key="d3">1056</data>
  <data key="d6">0.0</data>
  <data key="d4">0.0</data>
</node>
<node id="480">
  <data key="d0">Eggs</data>
  <data key="d1">Pinneberg</data>
  <data key="d2">Warehouse_Alnatura</data>
  <data key="d3">1056</data>
  <data key="d6">0.0</data>
  <data key="d4">0.0</data>
</node>
<node id="481">
  <data key="d0">Eggs</data>
  <data key="d1">Pinneberg</data>
  <data key="d2">Store_Alnatura</data>
  <data key="d3">1056</data>
  <data key="d6">0.0</data>
  <data key="d4">0.0</data>
</node>
<node id="482">
  <data key="d0">Eggs</data>
  <data key="d1">Pinneberg</data>
  <data key="d2">Warehouse_BartelsLangness</data>
  <data key="d3">1056</data>
  <data key="d6">0.0</data>
  <data key="d4">0.0</data>
</node>
<node id="483">
  <data key="d0">Eggs</data>
  <data key="d1">Pinneberg</data>
  <data key="d2">Store_BartelsLangness</data>
  <data key="d3">1056</data>
  <data key="d6">443.34148630994395</data>
  <data key="d4">443.34148630994395</data>
</node>
<node id="484">
  <data key="d0">Eggs</data>
  <data key="d1">Pinneberg</data>
  <data key="d2">Warehouse_Buenting</data>
  <data key="d3">1056</data>
  <data key="d6">0.0</data>
  <data key="d4">0.0</data>
</node>
<node id="485">
  <data key="d0">Eggs</data>
  <data key="d1">Pinneberg</data>
  <data key="d2">Store_Buenting</data>
  <data key="d3">1056</data>
  <data key="d6">0.0</data>
  <data key="d4">0.0</data>
</node>
<node id="486">
  <data key="d0">Eggs</data>
  <data key="d1">Pinneberg</data>
  <data key="d2">Warehouse_Coop</data>
  <data key="d3">1056</data>
  <data key="d6">0.0</data>
  <data key="d4">0.0</data>
</node>
<node id="487">
  <data key="d0">Eggs</data>
  <data key="d1">Pinneberg</data>
  <data key="d2">Store_Coop</data>
  <data key="d3">1056</data>
  <data key="d6">47.980529714441424</data>
  <data key="d4">47.980529714441424</data>
</node>
<node id="488">
  <data key="d0">Eggs</data>
  <data key="d1">Pinneberg</data>
  <data key="d2">Warehouse_Dennree</data>
  <data key="d3">1056</data>
  <data key="d6">0.0</data>
  <data key="d4">0.0</data>
</node>
<node id="489">
  <data key="d0">Eggs</data>
  <data key="d1">Pinneberg</data>
  <data key="d2">Store_Dennree</data>
  <data key="d3">1056</data>
  <data key="d6">26.025697045976933</data>
  <data key="d4">26.025697045976933</data>
</node>
<node id="490">
  <data key="d0">Eggs</data>
  <data key="d1">Pinneberg</data>
  <data key="d2">Warehouse_EdekaHessenring</data>
  <data key="d3">1056</data>
  <data key="d6">0.0</data>
  <data key="d4">0.0</data>
</node>
<node id="491">
  <data key="d0">Eggs</data>
  <data key="d1">Pinneberg</data>
  <data key="d2">Store_EdekaHessenring</data>
  <data key="d3">1056</data>
  <data key="d6">0.0</data>
  <data key="d4">0.0</data>
</node>
<node id="492">
  <data key="d0">Eggs</data>
  <data key="d1">Pinneberg</data>
  <data key="d2">Warehouse_EdekaMindenHannover</data>
  <data key="d3">1056</data>
  <data key="d6">0.0</data>
  <data key="d4">0.0</data>
</node>
<node id="493">
  <data key="d0">Eggs</data>
  <data key="d1">Pinneberg</data>
  <data key="d2">Store_EdekaMindenHannover</data>
  <data key="d3">1056</data>
  <data key="d6">2.6095284471233553</data>
  <data key="d4">2.6095284471233553</data>
</node>
<node id="494">
  <data key="d0">Eggs</data>
  <data key="d1">Pinneberg</data>
  <data key="d2">Warehouse_EdekaNord</data>
  <data key="d3">1056</data>
  <data key="d6">0.0</data>
  <data key="d4">0.0</data>
</node>
<node id="495">
  <data key="d0">Eggs</data>
  <data key="d1">Pinneberg</data>
  <data key="d2">Store_EdekaNord</data>
  <data key="d3">1056</data>
  <data key="d6">600.9222108035664</data>
  <data key="d4">600.9222108035664</data>
</node>
<node id="496">
  <data key="d0">Eggs</data>
  <data key="d1">Pinneberg</data>
  <data key="d2">Warehouse_EdekaNordbayern</data>
  <data key="d3">1056</data>
  <data key="d6">0.0</data>
  <data key="d4">0.0</data>
</node>
<node id="497">
  <data key="d0">Eggs</data>
  <data key="d1">Pinneberg</data>
  <data key="d2">Store_EdekaNordbayern</data>
  <data key="d3">1056</data>
  <data key="d6">0.0</data>
  <data key="d4">0.0</data>
</node>
<node id="498">
  <data key="d0">Eggs</data>
  <data key="d1">Pinneberg</data>
  <data key="d2">Warehouse_EdekaRheinRuhr</data>
  <data key="d3">1056</data>
  <data key="d6">0.0</data>
  <data key="d4">0.0</data>
</node>
<node id="499">
  <data key="d0">Eggs</data>
  <data key="d1">Pinneberg</data>
  <data key="d2">Store_EdekaRheinRuhr</data>
  <data key="d3">1056</data>
  <data key="d6">0.0</data>
  <data key="d4">0.0</data>
</node>
<node id="500">
  <data key="d0">Eggs</data>
  <data key="d1">Pinneberg</data>
  <data key="d2">Warehouse_EdekaSuedbayern</data>
  <data key="d3">1056</data>
  <data key="d6">0.0</data>
  <data key="d4">0.0</data>
</node>
<node id="501">
  <data key="d0">Eggs</data>
  <data key="d1">Pinneberg</data>
  <data key="d2">Store_EdekaSuedbayern</data>
  <data key="d3">1056</data>
  <data key="d6">0.0</data>
  <data key="d4">0.0</data>
</node>
<node id="502">
  <data key="d0">Eggs</data>
  <data key="d1">Pinneberg</data>
  <data key="d2">Warehouse_EdekaSuedwest</data>
  <data key="d3">1056</data>
  <data key="d6">0.0</data>
  <data key="d4">0.0</data>
</node>
<node id="503">
  <data key="d0">Eggs</data>
  <data key="d1">Pinneberg</data>
  <data key="d2">Store_EdekaSuedwest</data>
  <data key="d3">1056</data>
  <data key="d6">0.0</data>
  <data key="d4">0.0</data>
</node>
<node id="504">
  <data key="d0">Eggs</data>
  <data key="d1">Pinneberg</data>
  <data key="d2">Warehouse_Globus</data>
  <data key="d3">1056</data>
  <data key="d6">0.0</data>
  <data key="d4">0.0</data>
</node>
<node id="505">
  <data key="d0">Eggs</data>
  <data key="d1">Pinneberg</data>
  <data key="d2">Store_Globus</data>
  <data key="d3">1056</data>
  <data key="d6">0.0</data>
  <data key="d4">0.0</data>
</node>
<node id="506">
  <data key="d0">Eggs</data>
  <data key="d1">Pinneberg</data>
  <data key="d2">Warehouse_Kaes</data>
  <data key="d3">1056</data>
  <data key="d6">0.0</data>
  <data key="d4">0.0</data>
</node>
<node id="507">
  <data key="d0">Eggs</data>
  <data key="d1">Pinneberg</data>
  <data key="d2">Store_Kaes</data>
  <data key="d3">1056</data>
  <data key="d6">0.0</data>
  <data key="d4">0.0</data>
</node>
<node id="508">
  <data key="d0">Eggs</data>
  <data key="d1">Pinneberg</data>
  <data key="d2">Warehouse_KaisersTengelmann</data>
  <data key="d3">1056</data>
  <data key="d6">0.0</data>
  <data key="d4">0.0</data>
</node>
<node id="509">
  <data key="d0">Eggs</data>
  <data key="d1">Pinneberg</data>
  <data key="d2">Store_KaisersTengelmann</data>
  <data key="d3">1056</data>
  <data key="d6">0.0</data>
  <data key="d4">0.0</data>
</node>
<node id="510">
  <data key="d0">Eggs</data>
  <data key="d1">Pinneberg</data>
  <data key="d2">Warehouse_Kaufland</data>
  <data key="d3">1056</data>
  <data key="d6">0.0</data>
  <data key="d4">0.0</data>
</node>
<node id="511">
  <data key="d0">Eggs</data>
  <data key="d1">Pinneberg</data>
  <data key="d2">Store_Kaufland</data>
  <data key="d3">1056</data>
  <data key="d6">0.0</data>
  <data key="d4">0.0</data>
</node>
<node id="512">
  <data key="d0">Eggs</data>
  <data key="d1">Pinneberg</data>
  <data key="d2">Warehouse_KlaasKock</data>
  <data key="d3">1056</data>
  <data key="d6">0.0</data>
  <data key="d4">0.0</data>
</node>
<node id="513">
  <data key="d0">Eggs</data>
  <data key="d1">Pinneberg</data>
  <data key="d2">Store_KlaasKock</data>
  <data key="d3">1056</data>
  <data key="d6">0.0</data>
  <data key="d4">0.0</data>
</node>
<node id="514">
  <data key="d0">Eggs</data>
  <data key="d1">Pinneberg</data>
  <data key="d2">Warehouse_Lidl</data>
  <data key="d3">1056</data>
  <data key="d6">0.0</data>
  <data key="d4">0.0</data>
</node>
<node id="515">
  <data key="d0">Eggs</data>
  <data key="d1">Pinneberg</data>
  <data key="d2">Store_Lidl</data>
  <data key="d3">1056</data>
  <data key="d6">211.58056649276168</data>
  <data key="d4">211.58056649276168</data>
</node>
<node id="516">
  <data key="d0">Eggs</data>
  <data key="d1">Pinneberg</data>
  <data key="d2">Warehouse_Netto</data>
  <data key="d3">1056</data>
  <data key="d6">0.0</data>
  <data key="d4">0.0</data>
</node>
<node id="517">
  <data key="d0">Eggs</data>
  <data key="d1">Pinneberg</data>
  <data key="d2">Store_Netto</data>
  <data key="d3">1056</data>
  <data key="d6">83.67887887108894</data>
  <data key="d4">83.67887887108894</data>
</node>
<node id="518">
  <data key="d0">Eggs</data>
  <data key="d1">Pinneberg</data>
  <data key="d2">Warehouse_NettoNord</data>
  <data key="d3">1056</data>
  <data key="d6">0.0</data>
  <data key="d4">0.0</data>
</node>
<node id="519">
  <data key="d0">Eggs</data>
  <data key="d1">Pinneberg</data>
  <data key="d2">Store_NettoNord</data>
  <data key="d3">1056</data>
  <data key="d6">59.114517755501076</data>
  <data key="d4">59.114517755501076</data>
</node>
<node id="520">
  <data key="d0">Eggs</data>
  <data key="d1">Pinneberg</data>
  <data key="d2">Warehouse_Norma</data>
  <data key="d3">1056</data>
  <data key="d6">0.0</data>
  <data key="d4">0.0</data>
</node>
<node id="521">
  <data key="d0">Eggs</data>
  <data key="d1">Pinneberg</data>
  <data key="d2">Store_Norma</data>
  <data key="d3">1056</data>
  <data key="d6">0.0</data>
  <data key="d4">0.0</data>
</node>
<node id="522">
  <data key="d0">Eggs</data>
  <data key="d1">Pinneberg</data>
  <data key="d2">Warehouse_Penny</data>
  <data key="d3">1056</data>
  <data key="d6">0.0</data>
  <data key="d4">0.0</data>
</node>
<node id="523">
  <data key="d0">Eggs</data>
  <data key="d1">Pinneberg</data>
  <data key="d2">Store_Penny</data>
  <data key="d3">1056</data>
  <data key="d6">139.4184065016438</data>
  <data key="d4">139.4184065016438</data>
</node>
<node id="524">
  <data key="d0">Eggs</data>
  <data key="d1">Pinneberg</data>
  <data key="d2">Warehouse_Real</data>
  <data key="d3">1056</data>
  <data key="d6">0.0</data>
  <data key="d4">0.0</data>
</node>
<node id="525">
  <data key="d0">Eggs</data>
  <data key="d1">Pinneberg</data>
  <data key="d2">Store_Real</data>
  <data key="d3">1056</data>
  <data key="d6">0.0</data>
  <data key="d4">0.0</data>
</node>
<node id="526">
  <data key="d0">Eggs</data>
  <data key="d1">Pinneberg</data>
  <data key="d2">Warehouse_ReweHit</data>
  <data key="d3">1056</data>
  <data key="d6">0.0</data>
  <data key="d4">0.0</data>
</node>
<node id="527">
  <data key="d0">Eggs</data>
  <data key="d1">Pinneberg</data>
  <data key="d2">Store_ReweHit</data>
  <data key="d3">1056</data>
  <data key="d6">280.1589740831634</data>
  <data key="d4">280.1589740831634</data>
</node>
<node id="528">
  <data key="d0">Eggs</data>
  <data key="d1">Pinneberg</data>
  <data key="d2">Warehouse_Tegut</data>
  <data key="d3">1056</data>
  <data key="d6">0.0</data>
  <data key="d4">0.0</data>
</node>
<node id="529">
  <data key="d0">Eggs</data>
  <data key="d1">Pinneberg</data>
  <data key="d2">Store_Tegut</data>
  <data key="d3">1056</data>
  <data key="d6">0.0</data>
  <data key="d4">0.0</data>
</node>
<node id="530">
  <data key="d0">Eggs</data>
  <data key="d1">Pinneberg</data>
  <data key="d2">Warehouse_Wasgau</data>
  <data key="d3">1056</data>
  <data key="d6">0.0</data>
  <data key="d4">0.0</data>
</node>
<node id="531">
  <data key="d0">Eggs</data>
  <data key="d1">Pinneberg</data>
  <data key="d2">Store_Wasgau</data>
  <data key="d3">1056</data>
  <data key="d6">0.0</data>
  <data key="d4">0.0</data>
</node>
<node id="532">
  <data key="d0">Eggs</data>
  <data key="d1">Plön</data>
  <data key="d2">Producer</data>
  <data key="d3">1057</data>
  <data key="d4">4944.89706846172</data>
</node>
<node id="533">
  <data key="d0">Eggs</data>
  <data key="d1">Plön</data>
  <data key="d2">Consumer</data>
  <data key="d3">1057</data>
  <data key="d5">1181.8559832027686</data>
</node>
<node id="534">
  <data key="d0">Eggs</data>
  <data key="d1">Plön</data>
  <data key="d2">Wholesale</data>
  <data key="d3">1057</data>
  <data key="d6">195.00623722845683</data>
  <data key="d4">195.00623722845683</data>
</node>
<node id="535">
  <data key="d0">Eggs</data>
  <data key="d1">Plön</data>
  <data key="d2">Warehouse_AldiNord</data>
  <data key="d3">1057</data>
  <data key="d6">0.0</data>
  <data key="d4">0.0</data>
</node>
<node id="536">
  <data key="d0">Eggs</data>
  <data key="d1">Plön</data>
  <data key="d2">Store_AldiNord</data>
  <data key="d3">1057</data>
  <data key="d6">193.48803766321672</data>
  <data key="d4">193.48803766321672</data>
</node>
<node id="537">
  <data key="d0">Eggs</data>
  <data key="d1">Plön</data>
  <data key="d2">Warehouse_AldiSued</data>
  <data key="d3">1057</data>
  <data key="d6">0.0</data>
  <data key="d4">0.0</data>
</node>
<node id="538">
  <data key="d0">Eggs</data>
  <data key="d1">Plön</data>
  <data key="d2">Store_AldiSued</data>
  <data key="d3">1057</data>
  <data key="d6">0.0</data>
  <data key="d4">0.0</data>
</node>
<node id="539">
  <data key="d0">Eggs</data>
  <data key="d1">Plön</data>
  <data key="d2">Warehouse_Alnatura</data>
  <data key="d3">1057</data>
  <data key="d6">0.0</data>
  <data key="d4">0.0</data>
</node>
<node id="540">
  <data key="d0">Eggs</data>
  <data key="d1">Plön</data>
  <data key="d2">Store_Alnatura</data>
  <data key="d3">1057</data>
  <data key="d6">0.0</data>
  <data key="d4">0.0</data>
</node>
<node id="541">
  <data key="d0">Eggs</data>
  <data key="d1">Plön</data>
  <data key="d2">Warehouse_BartelsLangness</data>
  <data key="d3">1057</data>
  <data key="d6">0.0</data>
  <data key="d4">0.0</data>
</node>
<node id="542">
  <data key="d0">Eggs</data>
  <data key="d1">Plön</data>
  <data key="d2">Store_BartelsLangness</data>
  <data key="d3">1057</data>
  <data key="d6">94.40737526213549</data>
  <data key="d4">94.40737526213549</data>
</node>
<node id="543">
  <data key="d0">Eggs</data>
  <data key="d1">Plön</data>
  <data key="d2">Warehouse_Buenting</data>
  <data key="d3">1057</data>
  <data key="d6">0.0</data>
  <data key="d4">0.0</data>
</node>
<node id="544">
  <data key="d0">Eggs</data>
  <data key="d1">Plön</data>
  <data key="d2">Store_Buenting</data>
  <data key="d3">1057</data>
  <data key="d6">0.0</data>
  <data key="d4">0.0</data>
</node>
<node id="545">
  <data key="d0">Eggs</data>
  <data key="d1">Plön</data>
  <data key="d2">Warehouse_Coop</data>
  <data key="d3">1057</data>
  <data key="d6">0.0</data>
  <data key="d4">0.0</data>
</node>
<node id="546">
  <data key="d0">Eggs</data>
  <data key="d1">Plön</data>
  <data key="d2">Store_Coop</data>
  <data key="d3">1057</data>
  <data key="d6">200.9513469746674</data>
  <data key="d4">200.9513469746674</data>
</node>
<node id="547">
  <data key="d0">Eggs</data>
  <data key="d1">Plön</data>
  <data key="d2">Warehouse_Dennree</data>
  <data key="d3">1057</data>
  <data key="d6">0.0</data>
  <data key="d4">0.0</data>
</node>
<node id="548">
  <data key="d0">Eggs</data>
  <data key="d1">Plön</data>
  <data key="d2">Store_Dennree</data>
  <data key="d3">1057</data>
  <data key="d6">0.0</data>
  <data key="d4">0.0</data>
</node>
<node id="549">
  <data key="d0">Eggs</data>
  <data key="d1">Plön</data>
  <data key="d2">Warehouse_EdekaHessenring</data>
  <data key="d3">1057</data>
  <data key="d6">0.0</data>
  <data key="d4">0.0</data>
</node>
<node id="550">
  <data key="d0">Eggs</data>
  <data key="d1">Plön</data>
  <data key="d2">Store_EdekaHessenring</data>
  <data key="d3">1057</data>
  <data key="d6">0.0</data>
  <data key="d4">0.0</data>
</node>
<node id="551">
  <data key="d0">Eggs</data>
  <data key="d1">Plön</data>
  <data key="d2">Warehouse_EdekaMindenHannover</data>
  <data key="d3">1057</data>
  <data key="d6">0.0</data>
  <data key="d4">0.0</data>
</node>
<node id="552">
  <data key="d0">Eggs</data>
  <data key="d1">Plön</data>
  <data key="d2">Store_EdekaMindenHannover</data>
  <data key="d3">1057</data>
  <data key="d6">0.0</data>
  <data key="d4">0.0</data>
</node>
<node id="553">
  <data key="d0">Eggs</data>
  <data key="d1">Plön</data>
  <data key="d2">Warehouse_EdekaNord</data>
  <data key="d3">1057</data>
  <data key="d6">0.0</data>
  <data key="d4">0.0</data>
</node>
<node id="554">
  <data key="d0">Eggs</data>
  <data key="d1">Plön</data>
  <data key="d2">Store_EdekaNord</data>
  <data key="d3">1057</data>
  <data key="d6">177.37565961700076</data>
  <data key="d4">177.37565961700076</data>
</node>
<node id="555">
  <data key="d0">Eggs</data>
  <data key="d1">Plön</data>
  <data key="d2">Warehouse_EdekaNordbayern</data>
  <data key="d3">1057</data>
  <data key="d6">0.0</data>
  <data key="d4">0.0</data>
</node>
<node id="556">
  <data key="d0">Eggs</data>
  <data key="d1">Plön</data>
  <data key="d2">Store_EdekaNordbayern</data>
  <data key="d3">1057</data>
  <data key="d6">0.0</data>
  <data key="d4">0.0</data>
</node>
<node id="557">
  <data key="d0">Eggs</data>
  <data key="d1">Plön</data>
  <data key="d2">Warehouse_EdekaRheinRuhr</data>
  <data key="d3">1057</data>
  <data key="d6">0.0</data>
  <data key="d4">0.0</data>
</node>
<node id="558">
  <data key="d0">Eggs</data>
  <data key="d1">Plön</data>
  <data key="d2">Store_EdekaRheinRuhr</data>
  <data key="d3">1057</data>
  <data key="d6">0.0</data>
  <data key="d4">0.0</data>
</node>
<node id="559">
  <data key="d0">Eggs</data>
  <data key="d1">Plön</data>
  <data key="d2">Warehouse_EdekaSuedbayern</data>
  <data key="d3">1057</data>
  <data key="d6">0.0</data>
  <data key="d4">0.0</data>
</node>
<node id="560">
  <data key="d0">Eggs</data>
  <data key="d1">Plön</data>
  <data key="d2">Store_EdekaSuedbayern</data>
  <data key="d3">1057</data>
  <data key="d6">0.0</data>
  <data key="d4">0.0</data>
</node>
<node id="561">
  <data key="d0">Eggs</data>
  <data key="d1">Plön</data>
  <data key="d2">Warehouse_EdekaSuedwest</data>
  <data key="d3">1057</data>
  <data key="d6">0.0</data>
  <data key="d4">0.0</data>
</node>
<node id="562">
  <data key="d0">Eggs</data>
  <data key="d1">Plön</data>
  <data key="d2">Store_EdekaSuedwest</data>
  <data key="d3">1057</data>
  <data key="d6">0.0</data>
  <data key="d4">0.0</data>
</node>
<node id="563">
  <data key="d0">Eggs</data>
  <data key="d1">Plön</data>
  <data key="d2">Warehouse_Globus</data>
  <data key="d3">1057</data>
  <data key="d6">0.0</data>
  <data key="d4">0.0</data>
</node>
<node id="564">
  <data key="d0">Eggs</data>
  <data key="d1">Plön</data>
  <data key="d2">Store_Globus</data>
  <data key="d3">1057</data>
  <data key="d6">0.0</data>
  <data key="d4">0.0</data>
</node>
<node id="565">
  <data key="d0">Eggs</data>
  <data key="d1">Plön</data>
  <data key="d2">Warehouse_Kaes</data>
  <data key="d3">1057</data>
  <data key="d6">0.0</data>
  <data key="d4">0.0</data>
</node>
<node id="566">
  <data key="d0">Eggs</data>
  <data key="d1">Plön</data>
  <data key="d2">Store_Kaes</data>
  <data key="d3">1057</data>
  <data key="d6">0.0</data>
  <data key="d4">0.0</data>
</node>
<node id="567">
  <data key="d0">Eggs</data>
  <data key="d1">Plön</data>
  <data key="d2">Warehouse_KaisersTengelmann</data>
  <data key="d3">1057</data>
  <data key="d6">0.0</data>
  <data key="d4">0.0</data>
</node>
<node id="568">
  <data key="d0">Eggs</data>
  <data key="d1">Plön</data>
  <data key="d2">Store_KaisersTengelmann</data>
  <data key="d3">1057</data>
  <data key="d6">0.0</data>
  <data key="d4">0.0</data>
</node>
<node id="569">
  <data key="d0">Eggs</data>
  <data key="d1">Plön</data>
  <data key="d2">Warehouse_Kaufland</data>
  <data key="d3">1057</data>
  <data key="d6">0.0</data>
  <data key="d4">0.0</data>
</node>
<node id="570">
  <data key="d0">Eggs</data>
  <data key="d1">Plön</data>
  <data key="d2">Store_Kaufland</data>
  <data key="d3">1057</data>
  <data key="d6">0.0</data>
  <data key="d4">0.0</data>
</node>
<node id="571">
  <data key="d0">Eggs</data>
  <data key="d1">Plön</data>
  <data key="d2">Warehouse_KlaasKock</data>
  <data key="d3">1057</data>
  <data key="d6">0.0</data>
  <data key="d4">0.0</data>
</node>
<node id="572">
  <data key="d0">Eggs</data>
  <data key="d1">Plön</data>
  <data key="d2">Store_KlaasKock</data>
  <data key="d3">1057</data>
  <data key="d6">0.0</data>
  <data key="d4">0.0</data>
</node>
<node id="573">
  <data key="d0">Eggs</data>
  <data key="d1">Plön</data>
  <data key="d2">Warehouse_Lidl</data>
  <data key="d3">1057</data>
  <data key="d6">0.0</data>
  <data key="d4">0.0</data>
</node>
<node id="574">
  <data key="d0">Eggs</data>
  <data key="d1">Plön</data>
  <data key="d2">Store_Lidl</data>
  <data key="d3">1057</data>
  <data key="d6">96.39526606004523</data>
  <data key="d4">96.39526606004523</data>
</node>
<node id="575">
  <data key="d0">Eggs</data>
  <data key="d1">Plön</data>
  <data key="d2">Warehouse_Netto</data>
  <data key="d3">1057</data>
  <data key="d6">0.0</data>
  <data key="d4">0.0</data>
</node>
<node id="576">
  <data key="d0">Eggs</data>
  <data key="d1">Plön</data>
  <data key="d2">Store_Netto</data>
  <data key="d3">1057</data>
  <data key="d6">10.497458424049789</data>
  <data key="d4">10.497458424049789</data>
</node>
<node id="577">
  <data key="d0">Eggs</data>
  <data key="d1">Plön</data>
  <data key="d2">Warehouse_NettoNord</data>
  <data key="d3">1057</data>
  <data key="d6">0.0</data>
  <data key="d4">0.0</data>
</node>
<node id="578">
  <data key="d0">Eggs</data>
  <data key="d1">Plön</data>
  <data key="d2">Store_NettoNord</data>
  <data key="d3">1057</data>
  <data key="d6">11.85759423314594</data>
  <data key="d4">11.85759423314594</data>
</node>
<node id="579">
  <data key="d0">Eggs</data>
  <data key="d1">Plön</data>
  <data key="d2">Warehouse_Norma</data>
  <data key="d3">1057</data>
  <data key="d6">0.0</data>
  <data key="d4">0.0</data>
</node>
<node id="580">
  <data key="d0">Eggs</data>
  <data key="d1">Plön</data>
  <data key="d2">Store_Norma</data>
  <data key="d3">1057</data>
  <data key="d6">7.812062083013798</data>
  <data key="d4">7.812062083013798</data>
</node>
<node id="581">
  <data key="d0">Eggs</data>
  <data key="d1">Plön</data>
  <data key="d2">Warehouse_Penny</data>
  <data key="d3">1057</data>
  <data key="d6">0.0</data>
  <data key="d4">0.0</data>
</node>
<node id="582">
  <data key="d0">Eggs</data>
  <data key="d1">Plön</data>
  <data key="d2">Store_Penny</data>
  <data key="d3">1057</data>
  <data key="d6">23.29668514041614</data>
  <data key="d4">23.29668514041614</data>
</node>
<node id="583">
  <data key="d0">Eggs</data>
  <data key="d1">Plön</data>
  <data key="d2">Warehouse_Real</data>
  <data key="d3">1057</data>
  <data key="d6">0.0</data>
  <data key="d4">0.0</data>
</node>
<node id="584">
  <data key="d0">Eggs</data>
  <data key="d1">Plön</data>
  <data key="d2">Store_Real</data>
  <data key="d3">1057</data>
  <data key="d6">115.57666849601662</data>
  <data key="d4">115.57666849601662</data>
</node>
<node id="585">
  <data key="d0">Eggs</data>
  <data key="d1">Plön</data>
  <data key="d2">Warehouse_ReweHit</data>
  <data key="d3">1057</data>
  <data key="d6">0.0</data>
  <data key="d4">0.0</data>
</node>
<node id="586">
  <data key="d0">Eggs</data>
  <data key="d1">Plön</data>
  <data key="d2">Store_ReweHit</data>
  <data key="d3">1057</data>
  <data key="d6">35.57278269943782</data>
  <data key="d4">35.57278269943782</data>
</node>
<node id="587">
  <data key="d0">Eggs</data>
  <data key="d1">Plön</data>
  <data key="d2">Warehouse_Tegut</data>
  <data key="d3">1057</data>
  <data key="d6">0.0</data>
  <data key="d4">0.0</data>
</node>
<node id="588">
  <data key="d0">Eggs</data>
  <data key="d1">Plön</data>
  <data key="d2">Store_Tegut</data>
  <data key="d3">1057</data>
  <data key="d6">0.0</data>
  <data key="d4">0.0</data>
</node>
<node id="589">
  <data key="d0">Eggs</data>
  <data key="d1">Plön</data>
  <data key="d2">Warehouse_Wasgau</data>
  <data key="d3">1057</data>
  <data key="d6">0.0</data>
  <data key="d4">0.0</data>
</node>
<node id="590">
  <data key="d0">Eggs</data>
  <data key="d1">Plön</data>
  <data key="d2">Store_Wasgau</data>
  <data key="d3">1057</data>
  <data key="d6">0.0</data>
  <data key="d4">0.0</data>
</node>
<node id="591">
  <data key="d0">Eggs</data>
  <data key="d1">Rendsburg-Eckernförde</data>
  <data key="d2">Producer</data>
  <data key="d3">1058</data>
  <data key="d4">1361.397359435232</data>
</node>
<node id="592">
  <data key="d0">Eggs</data>
  <data key="d1">Rendsburg-Eckernförde</data>
  <data key="d2">Consumer</data>
  <data key="d3">1058</data>
  <data key="d5">2500.0272342024427</data>
</node>
<node id="593">
  <data key="d0">Eggs</data>
  <data key="d1">Rendsburg-Eckernförde</data>
  <data key="d2">Wholesale</data>
  <data key="d3">1058</data>
  <data key="d6">412.50449364340307</data>
  <data key="d4">412.50449364340307</data>
</node>
<node id="594">
  <data key="d0">Eggs</data>
  <data key="d1">Rendsburg-Eckernförde</data>
  <data key="d2">Warehouse_AldiNord</data>
  <data key="d3">1058</data>
  <data key="d6">1582.1769423747357</data>
  <data key="d4">1582.1769423747357</data>
</node>
<node id="595">
  <data key="d0">Eggs</data>
  <data key="d1">Rendsburg-Eckernförde</data>
  <data key="d2">Store_AldiNord</data>
  <data key="d3">1058</data>
  <data key="d6">355.95930170095755</data>
  <data key="d4">355.95930170095755</data>
</node>
<node id="596">
  <data key="d0">Eggs</data>
  <data key="d1">Rendsburg-Eckernförde</data>
  <data key="d2">Warehouse_AldiSued</data>
  <data key="d3">1058</data>
  <data key="d6">0.0</data>
  <data key="d4">0.0</data>
</node>
<node id="597">
  <data key="d0">Eggs</data>
  <data key="d1">Rendsburg-Eckernförde</data>
  <data key="d2">Store_AldiSued</data>
  <data key="d3">1058</data>
  <data key="d6">0.0</data>
  <data key="d4">0.0</data>
</node>
<node id="598">
  <data key="d0">Eggs</data>
  <data key="d1">Rendsburg-Eckernförde</data>
  <data key="d2">Warehouse_Alnatura</data>
  <data key="d3">1058</data>
  <data key="d6">0.0</data>
  <data key="d4">0.0</data>
</node>
<node id="599">
  <data key="d0">Eggs</data>
  <data key="d1">Rendsburg-Eckernförde</data>
  <data key="d2">Store_Alnatura</data>
  <data key="d3">1058</data>
  <data key="d6">0.0</data>
  <data key="d4">0.0</data>
</node>
<node id="600">
  <data key="d0">Eggs</data>
  <data key="d1">Rendsburg-Eckernförde</data>
  <data key="d2">Warehouse_BartelsLangness</data>
  <data key="d3">1058</data>
  <data key="d6">0.0</data>
  <data key="d4">0.0</data>
</node>
<node id="601">
  <data key="d0">Eggs</data>
  <data key="d1">Rendsburg-Eckernförde</data>
  <data key="d2">Store_BartelsLangness</data>
  <data key="d3">1058</data>
  <data key="d6">355.50433454707763</data>
  <data key="d4">355.50433454707763</data>
</node>
<node id="602">
  <data key="d0">Eggs</data>
  <data key="d1">Rendsburg-Eckernförde</data>
  <data key="d2">Warehouse_Buenting</data>
  <data key="d3">1058</data>
  <data key="d6">0.0</data>
  <data key="d4">0.0</data>
</node>
<node id="603">
  <data key="d0">Eggs</data>
  <data key="d1">Rendsburg-Eckernförde</data>
  <data key="d2">Store_Buenting</data>
  <data key="d3">1058</data>
  <data key="d6">0.0</data>
  <data key="d4">0.0</data>
</node>
<node id="604">
  <data key="d0">Eggs</data>
  <data key="d1">Rendsburg-Eckernförde</data>
  <data key="d2">Warehouse_Coop</data>
  <data key="d3">1058</data>
  <data key="d6">0.0</data>
  <data key="d4">0.0</data>
</node>
<node id="605">
  <data key="d0">Eggs</data>
  <data key="d1">Rendsburg-Eckernförde</data>
  <data key="d2">Store_Coop</data>
  <data key="d3">1058</data>
  <data key="d6">272.7003125409361</data>
  <data key="d4">272.7003125409361</data>
</node>
<node id="606">
  <data key="d0">Eggs</data>
  <data key="d1">Rendsburg-Eckernförde</data>
  <data key="d2">Warehouse_Dennree</data>
  <data key="d3">1058</data>
  <data key="d6">0.0</data>
  <data key="d4">0.0</data>
</node>
<node id="607">
  <data key="d0">Eggs</data>
  <data key="d1">Rendsburg-Eckernförde</data>
  <data key="d2">Store_Dennree</data>
  <data key="d3">1058</data>
  <data key="d6">2.2398382960241157</data>
  <data key="d4">2.2398382960241157</data>
</node>
<node id="608">
  <data key="d0">Eggs</data>
  <data key="d1">Rendsburg-Eckernförde</data>
  <data key="d2">Warehouse_EdekaHessenring</data>
  <data key="d3">1058</data>
  <data key="d6">0.0</data>
  <data key="d4">0.0</data>
</node>
<node id="609">
  <data key="d0">Eggs</data>
  <data key="d1">Rendsburg-Eckernförde</data>
  <data key="d2">Store_EdekaHessenring</data>
  <data key="d3">1058</data>
  <data key="d6">0.0</data>
  <data key="d4">0.0</data>
</node>
<node id="610">
  <data key="d0">Eggs</data>
  <data key="d1">Rendsburg-Eckernförde</data>
  <data key="d2">Warehouse_EdekaMindenHannover</data>
  <data key="d3">1058</data>
  <data key="d6">0.0</data>
  <data key="d4">0.0</data>
</node>
<node id="611">
  <data key="d0">Eggs</data>
  <data key="d1">Rendsburg-Eckernförde</data>
  <data key="d2">Store_EdekaMindenHannover</data>
  <data key="d3">1058</data>
  <data key="d6">0.0</data>
  <data key="d4">0.0</data>
</node>
<node id="612">
  <data key="d0">Eggs</data>
  <data key="d1">Rendsburg-Eckernförde</data>
  <data key="d2">Warehouse_EdekaNord</data>
  <data key="d3">1058</data>
  <data key="d6">0.0</data>
  <data key="d4">0.0</data>
</node>
<node id="613">
  <data key="d0">Eggs</data>
  <data key="d1">Rendsburg-Eckernförde</data>
  <data key="d2">Store_EdekaNord</data>
  <data key="d3">1058</data>
  <data key="d6">501.828770729528</data>
  <data key="d4">501.828770729528</data>
</node>
<node id="614">
  <data key="d0">Eggs</data>
  <data key="d1">Rendsburg-Eckernförde</data>
  <data key="d2">Warehouse_EdekaNordbayern</data>
  <data key="d3">1058</data>
  <data key="d6">0.0</data>
  <data key="d4">0.0</data>
</node>
<node id="615">
  <data key="d0">Eggs</data>
  <data key="d1">Rendsburg-Eckernförde</data>
  <data key="d2">Store_EdekaNordbayern</data>
  <data key="d3">1058</data>
  <data key="d6">0.0</data>
  <data key="d4">0.0</data>
</node>
<node id="616">
  <data key="d0">Eggs</data>
  <data key="d1">Rendsburg-Eckernförde</data>
  <data key="d2">Warehouse_EdekaRheinRuhr</data>
  <data key="d3">1058</data>
  <data key="d6">0.0</data>
  <data key="d4">0.0</data>
</node>
<node id="617">
  <data key="d0">Eggs</data>
  <data key="d1">Rendsburg-Eckernförde</data>
  <data key="d2">Store_EdekaRheinRuhr</data>
  <data key="d3">1058</data>
  <data key="d6">0.0</data>
  <data key="d4">0.0</data>
</node>
<node id="618">
  <data key="d0">Eggs</data>
  <data key="d1">Rendsburg-Eckernförde</data>
  <data key="d2">Warehouse_EdekaSuedbayern</data>
  <data key="d3">1058</data>
  <data key="d6">0.0</data>
  <data key="d4">0.0</data>
</node>
<node id="619">
  <data key="d0">Eggs</data>
  <data key="d1">Rendsburg-Eckernförde</data>
  <data key="d2">Store_EdekaSuedbayern</data>
  <data key="d3">1058</data>
  <data key="d6">0.0</data>
  <data key="d4">0.0</data>
</node>
<node id="620">
  <data key="d0">Eggs</data>
  <data key="d1">Rendsburg-Eckernförde</data>
  <data key="d2">Warehouse_EdekaSuedwest</data>
  <data key="d3">1058</data>
  <data key="d6">0.0</data>
  <data key="d4">0.0</data>
</node>
<node id="621">
  <data key="d0">Eggs</data>
  <data key="d1">Rendsburg-Eckernförde</data>
  <data key="d2">Store_EdekaSuedwest</data>
  <data key="d3">1058</data>
  <data key="d6">0.0</data>
  <data key="d4">0.0</data>
</node>
<node id="622">
  <data key="d0">Eggs</data>
  <data key="d1">Rendsburg-Eckernförde</data>
  <data key="d2">Warehouse_Globus</data>
  <data key="d3">1058</data>
  <data key="d6">0.0</data>
  <data key="d4">0.0</data>
</node>
<node id="623">
  <data key="d0">Eggs</data>
  <data key="d1">Rendsburg-Eckernförde</data>
  <data key="d2">Store_Globus</data>
  <data key="d3">1058</data>
  <data key="d6">0.0</data>
  <data key="d4">0.0</data>
</node>
<node id="624">
  <data key="d0">Eggs</data>
  <data key="d1">Rendsburg-Eckernförde</data>
  <data key="d2">Warehouse_Kaes</data>
  <data key="d3">1058</data>
  <data key="d6">0.0</data>
  <data key="d4">0.0</data>
</node>
<node id="625">
  <data key="d0">Eggs</data>
  <data key="d1">Rendsburg-Eckernförde</data>
  <data key="d2">Store_Kaes</data>
  <data key="d3">1058</data>
  <data key="d6">0.0</data>
  <data key="d4">0.0</data>
</node>
<node id="626">
  <data key="d0">Eggs</data>
  <data key="d1">Rendsburg-Eckernförde</data>
  <data key="d2">Warehouse_KaisersTengelmann</data>
  <data key="d3">1058</data>
  <data key="d6">0.0</data>
  <data key="d4">0.0</data>
</node>
<node id="627">
  <data key="d0">Eggs</data>
  <data key="d1">Rendsburg-Eckernförde</data>
  <data key="d2">Store_KaisersTengelmann</data>
  <data key="d3">1058</data>
  <data key="d6">0.0</data>
  <data key="d4">0.0</data>
</node>
<node id="628">
  <data key="d0">Eggs</data>
  <data key="d1">Rendsburg-Eckernförde</data>
  <data key="d2">Warehouse_Kaufland</data>
  <data key="d3">1058</data>
  <data key="d6">0.0</data>
  <data key="d4">0.0</data>
</node>
<node id="629">
  <data key="d0">Eggs</data>
  <data key="d1">Rendsburg-Eckernförde</data>
  <data key="d2">Store_Kaufland</data>
  <data key="d3">1058</data>
  <data key="d6">0.0</data>
  <data key="d4">0.0</data>
</node>
<node id="630">
  <data key="d0">Eggs</data>
  <data key="d1">Rendsburg-Eckernförde</data>
  <data key="d2">Warehouse_KlaasKock</data>
  <data key="d3">1058</data>
  <data key="d6">0.0</data>
  <data key="d4">0.0</data>
</node>
<node id="631">
  <data key="d0">Eggs</data>
  <data key="d1">Rendsburg-Eckernförde</data>
  <data key="d2">Store_KlaasKock</data>
  <data key="d3">1058</data>
  <data key="d6">0.0</data>
  <data key="d4">0.0</data>
</node>
<node id="632">
  <data key="d0">Eggs</data>
  <data key="d1">Rendsburg-Eckernförde</data>
  <data key="d2">Warehouse_Lidl</data>
  <data key="d3">1058</data>
  <data key="d6">1463.0430304945858</data>
  <data key="d4">1463.0430304945858</data>
</node>
<node id="633">
  <data key="d0">Eggs</data>
  <data key="d1">Rendsburg-Eckernförde</data>
  <data key="d2">Store_Lidl</data>
  <data key="d3">1058</data>
  <data key="d6">251.49184367545777</data>
  <data key="d4">251.49184367545777</data>
</node>
<node id="634">
  <data key="d0">Eggs</data>
  <data key="d1">Rendsburg-Eckernförde</data>
  <data key="d2">Warehouse_Netto</data>
  <data key="d3">1058</data>
  <data key="d6">0.0</data>
  <data key="d4">0.0</data>
</node>
<node id="635">
  <data key="d0">Eggs</data>
  <data key="d1">Rendsburg-Eckernförde</data>
  <data key="d2">Store_Netto</data>
  <data key="d3">1058</data>
  <data key="d6">84.16892346778124</data>
  <data key="d4">84.16892346778124</data>
</node>
<node id="636">
  <data key="d0">Eggs</data>
  <data key="d1">Rendsburg-Eckernförde</data>
  <data key="d2">Warehouse_NettoNord</data>
  <data key="d3">1058</data>
  <data key="d6">0.0</data>
  <data key="d4">0.0</data>
</node>
<node id="637">
  <data key="d0">Eggs</data>
  <data key="d1">Rendsburg-Eckernförde</data>
  <data key="d2">Store_NettoNord</data>
  <data key="d3">1058</data>
  <data key="d6">11.899140947628114</data>
  <data key="d4">11.899140947628114</data>
</node>
<node id="638">
  <data key="d0">Eggs</data>
  <data key="d1">Rendsburg-Eckernförde</data>
  <data key="d2">Warehouse_Norma</data>
  <data key="d3">1058</data>
  <data key="d6">0.0</data>
  <data key="d4">0.0</data>
</node>
<node id="639">
  <data key="d0">Eggs</data>
  <data key="d1">Rendsburg-Eckernförde</data>
  <data key="d2">Store_Norma</data>
  <data key="d3">1058</data>
  <data key="d6">0.0</data>
  <data key="d4">0.0</data>
</node>
<node id="640">
  <data key="d0">Eggs</data>
  <data key="d1">Rendsburg-Eckernförde</data>
  <data key="d2">Warehouse_Penny</data>
  <data key="d3">1058</data>
  <data key="d6">0.0</data>
  <data key="d4">0.0</data>
</node>
<node id="641">
  <data key="d0">Eggs</data>
  <data key="d1">Rendsburg-Eckernförde</data>
  <data key="d2">Store_Penny</data>
  <data key="d3">1058</data>
  <data key="d6">70.09993917087975</data>
  <data key="d4">70.09993917087975</data>
</node>
<node id="642">
  <data key="d0">Eggs</data>
  <data key="d1">Rendsburg-Eckernförde</data>
  <data key="d2">Warehouse_Real</data>
  <data key="d3">1058</data>
  <data key="d6">0.0</data>
  <data key="d4">0.0</data>
</node>
<node id="643">
  <data key="d0">Eggs</data>
  <data key="d1">Rendsburg-Eckernförde</data>
  <data key="d2">Store_Real</data>
  <data key="d3">1058</data>
  <data key="d6">115.98162676599874</data>
  <data key="d4">115.98162676599874</data>
</node>
<node id="644">
  <data key="d0">Eggs</data>
  <data key="d1">Rendsburg-Eckernförde</data>
  <data key="d2">Warehouse_ReweHit</data>
  <data key="d3">1058</data>
  <data key="d6">0.0</data>
  <data key="d4">0.0</data>
</node>
<node id="645">
  <data key="d0">Eggs</data>
  <data key="d1">Rendsburg-Eckernförde</data>
  <data key="d2">Store_ReweHit</data>
  <data key="d3">1058</data>
  <data key="d6">24.148256629010003</data>
  <data key="d4">24.148256629010003</data>
</node>
<node id="646">
  <data key="d0">Eggs</data>
  <data key="d1">Rendsburg-Eckernförde</data>
  <data key="d2">Warehouse_Tegut</data>
  <data key="d3">1058</data>
  <data key="d6">0.0</data>
  <data key="d4">0.0</data>
</node>
<node id="647">
  <data key="d0">Eggs</data>
  <data key="d1">Rendsburg-Eckernförde</data>
  <data key="d2">Store_Tegut</data>
  <data key="d3">1058</data>
  <data key="d6">0.0</data>
  <data key="d4">0.0</data>
</node>
<node id="648">
  <data key="d0">Eggs</data>
  <data key="d1">Rendsburg-Eckernförde</data>
  <data key="d2">Warehouse_Wasgau</data>
  <data key="d3">1058</data>
  <data key="d6">0.0</data>
  <data key="d4">0.0</data>
</node>
<node id="649">
  <data key="d0">Eggs</data>
  <data key="d1">Rendsburg-Eckernförde</data>
  <data key="d2">Store_Wasgau</data>
  <data key="d3">1058</data>
  <data key="d6">0.0</data>
  <data key="d4">0.0</data>
</node>
<node id="650">
  <data key="d0">Eggs</data>
  <data key="d1">Schleswig-Flensburg</data>
  <data key="d2">Producer</data>
  <data key="d3">1059</data>
  <data key="d4">905.3031306395409</data>
</node>
<node id="651">
  <data key="d0">Eggs</data>
  <data key="d1">Schleswig-Flensburg</data>
  <data key="d2">Consumer</data>
  <data key="d3">1059</data>
  <data key="d5">1817.8260236427648</data>
</node>
<node id="652">
  <data key="d0">Eggs</data>
  <data key="d1">Schleswig-Flensburg</data>
  <data key="d2">Wholesale</data>
  <data key="d3">1059</data>
  <data key="d6">299.9412939010562</data>
  <data key="d4">299.9412939010562</data>
</node>
<node id="653">
  <data key="d0">Eggs</data>
  <data key="d1">Schleswig-Flensburg</data>
  <data key="d2">Warehouse_AldiNord</data>
  <data key="d3">1059</data>
  <data key="d6">0.0</data>
  <data key="d4">0.0</data>
</node>
<node id="654">
  <data key="d0">Eggs</data>
  <data key="d1">Schleswig-Flensburg</data>
  <data key="d2">Store_AldiNord</data>
  <data key="d3">1059</data>
  <data key="d6">264.49075020279065</data>
  <data key="d4">264.49075020279065</data>
</node>
<node id="655">
  <data key="d0">Eggs</data>
  <data key="d1">Schleswig-Flensburg</data>
  <data key="d2">Warehouse_AldiSued</data>
  <data key="d3">1059</data>
  <data key="d6">0.0</data>
  <data key="d4">0.0</data>
</node>
<node id="656">
  <data key="d0">Eggs</data>
  <data key="d1">Schleswig-Flensburg</data>
  <data key="d2">Store_AldiSued</data>
  <data key="d3">1059</data>
  <data key="d6">0.0</data>
  <data key="d4">0.0</data>
</node>
<node id="657">
  <data key="d0">Eggs</data>
  <data key="d1">Schleswig-Flensburg</data>
  <data key="d2">Warehouse_Alnatura</data>
  <data key="d3">1059</data>
  <data key="d6">0.0</data>
  <data key="d4">0.0</data>
</node>
<node id="658">
  <data key="d0">Eggs</data>
  <data key="d1">Schleswig-Flensburg</data>
  <data key="d2">Store_Alnatura</data>
  <data key="d3">1059</data>
  <data key="d6">0.0</data>
  <data key="d4">0.0</data>
</node>
<node id="659">
  <data key="d0">Eggs</data>
  <data key="d1">Schleswig-Flensburg</data>
  <data key="d2">Warehouse_BartelsLangness</data>
  <data key="d3">1059</data>
  <data key="d6">0.0</data>
  <data key="d4">0.0</data>
</node>
<node id="660">
  <data key="d0">Eggs</data>
  <data key="d1">Schleswig-Flensburg</data>
  <data key="d2">Store_BartelsLangness</data>
  <data key="d3">1059</data>
  <data key="d6">165.19149486887432</data>
  <data key="d4">165.19149486887432</data>
</node>
<node id="661">
  <data key="d0">Eggs</data>
  <data key="d1">Schleswig-Flensburg</data>
  <data key="d2">Warehouse_Buenting</data>
  <data key="d3">1059</data>
  <data key="d6">0.0</data>
  <data key="d4">0.0</data>
</node>
<node id="662">
  <data key="d0">Eggs</data>
  <data key="d1">Schleswig-Flensburg</data>
  <data key="d2">Store_Buenting</data>
  <data key="d3">1059</data>
  <data key="d6">0.0</data>
  <data key="d4">0.0</data>
</node>
<node id="663">
  <data key="d0">Eggs</data>
  <data key="d1">Schleswig-Flensburg</data>
  <data key="d2">Warehouse_Coop</data>
  <data key="d3">1059</data>
  <data key="d6">0.0</data>
  <data key="d4">0.0</data>
</node>
<node id="664">
  <data key="d0">Eggs</data>
  <data key="d1">Schleswig-Flensburg</data>
  <data key="d2">Store_Coop</data>
  <data key="d3">1059</data>
  <data key="d6">160.29646115523056</data>
  <data key="d4">160.29646115523056</data>
</node>
<node id="665">
  <data key="d0">Eggs</data>
  <data key="d1">Schleswig-Flensburg</data>
  <data key="d2">Warehouse_Dennree</data>
  <data key="d3">1059</data>
  <data key="d6">0.0</data>
  <data key="d4">0.0</data>
</node>
<node id="666">
  <data key="d0">Eggs</data>
  <data key="d1">Schleswig-Flensburg</data>
  <data key="d2">Store_Dennree</data>
  <data key="d3">1059</data>
  <data key="d6">0.0</data>
  <data key="d4">0.0</data>
</node>
<node id="667">
  <data key="d0">Eggs</data>
  <data key="d1">Schleswig-Flensburg</data>
  <data key="d2">Warehouse_EdekaHessenring</data>
  <data key="d3">1059</data>
  <data key="d6">0.0</data>
  <data key="d4">0.0</data>
</node>
<node id="668">
  <data key="d0">Eggs</data>
  <data key="d1">Schleswig-Flensburg</data>
  <data key="d2">Store_EdekaHessenring</data>
  <data key="d3">1059</data>
  <data key="d6">0.0</data>
  <data key="d4">0.0</data>
</node>
<node id="669">
  <data key="d0">Eggs</data>
  <data key="d1">Schleswig-Flensburg</data>
  <data key="d2">Warehouse_EdekaMindenHannover</data>
  <data key="d3">1059</data>
  <data key="d6">0.0</data>
  <data key="d4">0.0</data>
</node>
<node id="670">
  <data key="d0">Eggs</data>
  <data key="d1">Schleswig-Flensburg</data>
  <data key="d2">Store_EdekaMindenHannover</data>
  <data key="d3">1059</data>
  <data key="d6">0.0</data>
  <data key="d4">0.0</data>
</node>
<node id="671">
  <data key="d0">Eggs</data>
  <data key="d1">Schleswig-Flensburg</data>
  <data key="d2">Warehouse_EdekaNord</data>
  <data key="d3">1059</data>
  <data key="d6">0.0</data>
  <data key="d4">0.0</data>
</node>
<node id="672">
  <data key="d0">Eggs</data>
  <data key="d1">Schleswig-Flensburg</data>
  <data key="d2">Store_EdekaNord</data>
  <data key="d3">1059</data>
  <data key="d6">410.6742570147885</data>
  <data key="d4">410.6742570147885</data>
</node>
<node id="673">
  <data key="d0">Eggs</data>
  <data key="d1">Schleswig-Flensburg</data>
  <data key="d2">Warehouse_EdekaNordbayern</data>
  <data key="d3">1059</data>
  <data key="d6">0.0</data>
  <data key="d4">0.0</data>
</node>
<node id="674">
  <data key="d0">Eggs</data>
  <data key="d1">Schleswig-Flensburg</data>
  <data key="d2">Store_EdekaNordbayern</data>
  <data key="d3">1059</data>
  <data key="d6">0.0</data>
  <data key="d4">0.0</data>
</node>
<node id="675">
  <data key="d0">Eggs</data>
  <data key="d1">Schleswig-Flensburg</data>
  <data key="d2">Warehouse_EdekaRheinRuhr</data>
  <data key="d3">1059</data>
  <data key="d6">0.0</data>
  <data key="d4">0.0</data>
</node>
<node id="676">
  <data key="d0">Eggs</data>
  <data key="d1">Schleswig-Flensburg</data>
  <data key="d2">Store_EdekaRheinRuhr</data>
  <data key="d3">1059</data>
  <data key="d6">0.0</data>
  <data key="d4">0.0</data>
</node>
<node id="677">
  <data key="d0">Eggs</data>
  <data key="d1">Schleswig-Flensburg</data>
  <data key="d2">Warehouse_EdekaSuedbayern</data>
  <data key="d3">1059</data>
  <data key="d6">0.0</data>
  <data key="d4">0.0</data>
</node>
<node id="678">
  <data key="d0">Eggs</data>
  <data key="d1">Schleswig-Flensburg</data>
  <data key="d2">Store_EdekaSuedbayern</data>
  <data key="d3">1059</data>
  <data key="d6">0.0</data>
  <data key="d4">0.0</data>
</node>
<node id="679">
  <data key="d0">Eggs</data>
  <data key="d1">Schleswig-Flensburg</data>
  <data key="d2">Warehouse_EdekaSuedwest</data>
  <data key="d3">1059</data>
  <data key="d6">0.0</data>
  <data key="d4">0.0</data>
</node>
<node id="680">
  <data key="d0">Eggs</data>
  <data key="d1">Schleswig-Flensburg</data>
  <data key="d2">Store_EdekaSuedwest</data>
  <data key="d3">1059</data>
  <data key="d6">0.0</data>
  <data key="d4">0.0</data>
</node>
<node id="681">
  <data key="d0">Eggs</data>
  <data key="d1">Schleswig-Flensburg</data>
  <data key="d2">Warehouse_Globus</data>
  <data key="d3">1059</data>
  <data key="d6">0.0</data>
  <data key="d4">0.0</data>
</node>
<node id="682">
  <data key="d0">Eggs</data>
  <data key="d1">Schleswig-Flensburg</data>
  <data key="d2">Store_Globus</data>
  <data key="d3">1059</data>
  <data key="d6">0.0</data>
  <data key="d4">0.0</data>
</node>
<node id="683">
  <data key="d0">Eggs</data>
  <data key="d1">Schleswig-Flensburg</data>
  <data key="d2">Warehouse_Kaes</data>
  <data key="d3">1059</data>
  <data key="d6">0.0</data>
  <data key="d4">0.0</data>
</node>
<node id="684">
  <data key="d0">Eggs</data>
  <data key="d1">Schleswig-Flensburg</data>
  <data key="d2">Store_Kaes</data>
  <data key="d3">1059</data>
  <data key="d6">0.0</data>
  <data key="d4">0.0</data>
</node>
<node id="685">
  <data key="d0">Eggs</data>
  <data key="d1">Schleswig-Flensburg</data>
  <data key="d2">Warehouse_KaisersTengelmann</data>
  <data key="d3">1059</data>
  <data key="d6">0.0</data>
  <data key="d4">0.0</data>
</node>
<node id="686">
  <data key="d0">Eggs</data>
  <data key="d1">Schleswig-Flensburg</data>
  <data key="d2">Store_KaisersTengelmann</data>
  <data key="d3">1059</data>
  <data key="d6">0.0</data>
  <data key="d4">0.0</data>
</node>
<node id="687">
  <data key="d0">Eggs</data>
  <data key="d1">Schleswig-Flensburg</data>
  <data key="d2">Warehouse_Kaufland</data>
  <data key="d3">1059</data>
  <data key="d6">0.0</data>
  <data key="d4">0.0</data>
</node>
<node id="688">
  <data key="d0">Eggs</data>
  <data key="d1">Schleswig-Flensburg</data>
  <data key="d2">Store_Kaufland</data>
  <data key="d3">1059</data>
  <data key="d6">0.0</data>
  <data key="d4">0.0</data>
</node>
<node id="689">
  <data key="d0">Eggs</data>
  <data key="d1">Schleswig-Flensburg</data>
  <data key="d2">Warehouse_KlaasKock</data>
  <data key="d3">1059</data>
  <data key="d6">0.0</data>
  <data key="d4">0.0</data>
</node>
<node id="690">
  <data key="d0">Eggs</data>
  <data key="d1">Schleswig-Flensburg</data>
  <data key="d2">Store_KlaasKock</data>
  <data key="d3">1059</data>
  <data key="d6">0.0</data>
  <data key="d4">0.0</data>
</node>
<node id="691">
  <data key="d0">Eggs</data>
  <data key="d1">Schleswig-Flensburg</data>
  <data key="d2">Warehouse_Lidl</data>
  <data key="d3">1059</data>
  <data key="d6">0.0</data>
  <data key="d4">0.0</data>
</node>
<node id="692">
  <data key="d0">Eggs</data>
  <data key="d1">Schleswig-Flensburg</data>
  <data key="d2">Store_Lidl</data>
  <data key="d3">1059</data>
  <data key="d6">228.41371601457203</data>
  <data key="d4">228.41371601457203</data>
</node>
<node id="693">
  <data key="d0">Eggs</data>
  <data key="d1">Schleswig-Flensburg</data>
  <data key="d2">Warehouse_Netto</data>
  <data key="d3">1059</data>
  <data key="d6">0.0</data>
  <data key="d4">0.0</data>
</node>
<node id="694">
  <data key="d0">Eggs</data>
  <data key="d1">Schleswig-Flensburg</data>
  <data key="d2">Store_Netto</data>
  <data key="d3">1059</data>
  <data key="d6">66.87760346432779</data>
  <data key="d4">66.87760346432779</data>
</node>
<node id="695">
  <data key="d0">Eggs</data>
  <data key="d1">Schleswig-Flensburg</data>
  <data key="d2">Warehouse_NettoNord</data>
  <data key="d3">1059</data>
  <data key="d6">0.0</data>
  <data key="d4">0.0</data>
</node>
<node id="696">
  <data key="d0">Eggs</data>
  <data key="d1">Schleswig-Flensburg</data>
  <data key="d2">Store_NettoNord</data>
  <data key="d3">1059</data>
  <data key="d6">0.0</data>
  <data key="d4">0.0</data>
</node>
<node id="697">
  <data key="d0">Eggs</data>
  <data key="d1">Schleswig-Flensburg</data>
  <data key="d2">Warehouse_Norma</data>
  <data key="d3">1059</data>
  <data key="d6">0.0</data>
  <data key="d4">0.0</data>
</node>
<node id="698">
  <data key="d0">Eggs</data>
  <data key="d1">Schleswig-Flensburg</data>
  <data key="d2">Store_Norma</data>
  <data key="d3">1059</data>
  <data key="d6">0.0</data>
  <data key="d4">0.0</data>
</node>
<node id="699">
  <data key="d0">Eggs</data>
  <data key="d1">Schleswig-Flensburg</data>
  <data key="d2">Warehouse_Penny</data>
  <data key="d3">1059</data>
  <data key="d6">0.0</data>
  <data key="d4">0.0</data>
</node>
<node id="700">
  <data key="d0">Eggs</data>
  <data key="d1">Schleswig-Flensburg</data>
  <data key="d2">Store_Penny</data>
  <data key="d3">1059</data>
  <data key="d6">53.08250845314992</data>
  <data key="d4">53.08250845314992</data>
</node>
<node id="701">
  <data key="d0">Eggs</data>
  <data key="d1">Schleswig-Flensburg</data>
  <data key="d2">Warehouse_Real</data>
  <data key="d3">1059</data>
  <data key="d6">0.0</data>
  <data key="d4">0.0</data>
</node>
<node id="702">
  <data key="d0">Eggs</data>
  <data key="d1">Schleswig-Flensburg</data>
  <data key="d2">Store_Real</data>
  <data key="d3">1059</data>
  <data key="d6">105.33858264295736</data>
  <data key="d4">105.33858264295736</data>
</node>
<node id="703">
  <data key="d0">Eggs</data>
  <data key="d1">Schleswig-Flensburg</data>
  <data key="d2">Warehouse_ReweHit</data>
  <data key="d3">1059</data>
  <data key="d6">0.0</data>
  <data key="d4">0.0</data>
</node>
<node id="704">
  <data key="d0">Eggs</data>
  <data key="d1">Schleswig-Flensburg</data>
  <data key="d2">Store_ReweHit</data>
  <data key="d3">1059</data>
  <data key="d6">33.34344393254746</data>
  <data key="d4">33.34344393254746</data>
</node>
<node id="705">
  <data key="d0">Eggs</data>
  <data key="d1">Schleswig-Flensburg</data>
  <data key="d2">Warehouse_Tegut</data>
  <data key="d3">1059</data>
  <data key="d6">0.0</data>
  <data key="d4">0.0</data>
</node>
<node id="706">
  <data key="d0">Eggs</data>
  <data key="d1">Schleswig-Flensburg</data>
  <data key="d2">Store_Tegut</data>
  <data key="d3">1059</data>
  <data key="d6">0.0</data>
  <data key="d4">0.0</data>
</node>
<node id="707">
  <data key="d0">Eggs</data>
  <data key="d1">Schleswig-Flensburg</data>
  <data key="d2">Warehouse_Wasgau</data>
  <data key="d3">1059</data>
  <data key="d6">0.0</data>
  <data key="d4">0.0</data>
</node>
<node id="708">
  <data key="d0">Eggs</data>
  <data key="d1">Schleswig-Flensburg</data>
  <data key="d2">Store_Wasgau</data>
  <data key="d3">1059</data>
  <data key="d6">0.0</data>
  <data key="d4">0.0</data>
</node>
<node id="709">
  <data key="d0">Eggs</data>
  <data key="d1">Segeberg</data>
  <data key="d2">Producer</data>
  <data key="d3">1060</data>
  <data key="d4">4848.267764080765</data>
</node>
<node id="710">
  <data key="d0">Eggs</data>
  <data key="d1">Segeberg</data>
  <data key="d2">Consumer</data>
  <data key="d3">1060</data>
  <data key="d5">2443.4157347821347</data>
</node>
<node id="711">
  <data key="d0">Eggs</data>
  <data key="d1">Segeberg</data>
  <data key="d2">Wholesale</data>
  <data key="d3">1060</data>
  <data key="d6">403.16359623905225</data>
  <data key="d4">403.16359623905225</data>
</node>
<node id="712">
  <data key="d0">Eggs</data>
  <data key="d1">Segeberg</data>
  <data key="d2">Warehouse_AldiNord</data>
  <data key="d3">1060</data>
  <data key="d6">0.0</data>
  <data key="d4">0.0</data>
</node>
<node id="713">
  <data key="d0">Eggs</data>
  <data key="d1">Segeberg</data>
  <data key="d2">Store_AldiNord</data>
  <data key="d3">1060</data>
  <data key="d6">351.81870772852074</data>
  <data key="d4">351.81870772852074</data>
</node>
<node id="714">
  <data key="d0">Eggs</data>
  <data key="d1">Segeberg</data>
  <data key="d2">Warehouse_AldiSued</data>
  <data key="d3">1060</data>
  <data key="d6">0.0</data>
  <data key="d4">0.0</data>
</node>
<node id="715">
  <data key="d0">Eggs</data>
  <data key="d1">Segeberg</data>
  <data key="d2">Store_AldiSued</data>
  <data key="d3">1060</data>
  <data key="d6">0.0</data>
  <data key="d4">0.0</data>
</node>
<node id="716">
  <data key="d0">Eggs</data>
  <data key="d1">Segeberg</data>
  <data key="d2">Warehouse_Alnatura</data>
  <data key="d3">1060</data>
  <data key="d6">0.0</data>
  <data key="d4">0.0</data>
</node>
<node id="717">
  <data key="d0">Eggs</data>
  <data key="d1">Segeberg</data>
  <data key="d2">Store_Alnatura</data>
  <data key="d3">1060</data>
  <data key="d6">0.0</data>
  <data key="d4">0.0</data>
</node>
<node id="718">
  <data key="d0">Eggs</data>
  <data key="d1">Segeberg</data>
  <data key="d2">Warehouse_BartelsLangness</data>
  <data key="d3">1060</data>
  <data key="d6">0.0</data>
  <data key="d4">0.0</data>
</node>
<node id="719">
  <data key="d0">Eggs</data>
  <data key="d1">Segeberg</data>
  <data key="d2">Store_BartelsLangness</data>
  <data key="d3">1060</data>
  <data key="d6">289.8844090564933</data>
  <data key="d4">289.8844090564933</data>
</node>
<node id="720">
  <data key="d0">Eggs</data>
  <data key="d1">Segeberg</data>
  <data key="d2">Warehouse_Buenting</data>
  <data key="d3">1060</data>
  <data key="d6">0.0</data>
  <data key="d4">0.0</data>
</node>
<node id="721">
  <data key="d0">Eggs</data>
  <data key="d1">Segeberg</data>
  <data key="d2">Store_Buenting</data>
  <data key="d3">1060</data>
  <data key="d6">0.0</data>
  <data key="d4">0.0</data>
</node>
<node id="722">
  <data key="d0">Eggs</data>
  <data key="d1">Segeberg</data>
  <data key="d2">Warehouse_Coop</data>
  <data key="d3">1060</data>
  <data key="d6">0.0</data>
  <data key="d4">0.0</data>
</node>
<node id="723">
  <data key="d0">Eggs</data>
  <data key="d1">Segeberg</data>
  <data key="d2">Store_Coop</data>
  <data key="d3">1060</data>
  <data key="d6">109.3363248060308</data>
  <data key="d4">109.3363248060308</data>
</node>
<node id="724">
  <data key="d0">Eggs</data>
  <data key="d1">Segeberg</data>
  <data key="d2">Warehouse_Dennree</data>
  <data key="d3">1060</data>
  <data key="d6">0.0</data>
  <data key="d4">0.0</data>
</node>
<node id="725">
  <data key="d0">Eggs</data>
  <data key="d1">Segeberg</data>
  <data key="d2">Store_Dennree</data>
  <data key="d3">1060</data>
  <data key="d6">0.0</data>
  <data key="d4">0.0</data>
</node>
<node id="726">
  <data key="d0">Eggs</data>
  <data key="d1">Segeberg</data>
  <data key="d2">Warehouse_EdekaHessenring</data>
  <data key="d3">1060</data>
  <data key="d6">0.0</data>
  <data key="d4">0.0</data>
</node>
<node id="727">
  <data key="d0">Eggs</data>
  <data key="d1">Segeberg</data>
  <data key="d2">Store_EdekaHessenring</data>
  <data key="d3">1060</data>
  <data key="d6">0.0</data>
  <data key="d4">0.0</data>
</node>
<node id="728">
  <data key="d0">Eggs</data>
  <data key="d1">Segeberg</data>
  <data key="d2">Warehouse_EdekaMindenHannover</data>
  <data key="d3">1060</data>
  <data key="d6">0.0</data>
  <data key="d4">0.0</data>
</node>
<node id="729">
  <data key="d0">Eggs</data>
  <data key="d1">Segeberg</data>
  <data key="d2">Store_EdekaMindenHannover</data>
  <data key="d3">1060</data>
  <data key="d6">0.0</data>
  <data key="d4">0.0</data>
</node>
<node id="730">
  <data key="d0">Eggs</data>
  <data key="d1">Segeberg</data>
  <data key="d2">Warehouse_EdekaNord</data>
  <data key="d3">1060</data>
  <data key="d6">0.0</data>
  <data key="d4">0.0</data>
</node>
<node id="731">
  <data key="d0">Eggs</data>
  <data key="d1">Segeberg</data>
  <data key="d2">Store_EdekaNord</data>
  <data key="d3">1060</data>
  <data key="d6">397.98857110368914</data>
  <data key="d4">397.98857110368914</data>
</node>
<node id="732">
  <data key="d0">Eggs</data>
  <data key="d1">Segeberg</data>
  <data key="d2">Warehouse_EdekaNordbayern</data>
  <data key="d3">1060</data>
  <data key="d6">0.0</data>
  <data key="d4">0.0</data>
</node>
<node id="733">
  <data key="d0">Eggs</data>
  <data key="d1">Segeberg</data>
  <data key="d2">Store_EdekaNordbayern</data>
  <data key="d3">1060</data>
  <data key="d6">0.0</data>
  <data key="d4">0.0</data>
</node>
<node id="734">
  <data key="d0">Eggs</data>
  <data key="d1">Segeberg</data>
  <data key="d2">Warehouse_EdekaRheinRuhr</data>
  <data key="d3">1060</data>
  <data key="d6">0.0</data>
  <data key="d4">0.0</data>
</node>
<node id="735">
  <data key="d0">Eggs</data>
  <data key="d1">Segeberg</data>
  <data key="d2">Store_EdekaRheinRuhr</data>
  <data key="d3">1060</data>
  <data key="d6">0.0</data>
  <data key="d4">0.0</data>
</node>
<node id="736">
  <data key="d0">Eggs</data>
  <data key="d1">Segeberg</data>
  <data key="d2">Warehouse_EdekaSuedbayern</data>
  <data key="d3">1060</data>
  <data key="d6">0.0</data>
  <data key="d4">0.0</data>
</node>
<node id="737">
  <data key="d0">Eggs</data>
  <data key="d1">Segeberg</data>
  <data key="d2">Store_EdekaSuedbayern</data>
  <data key="d3">1060</data>
  <data key="d6">0.0</data>
  <data key="d4">0.0</data>
</node>
<node id="738">
  <data key="d0">Eggs</data>
  <data key="d1">Segeberg</data>
  <data key="d2">Warehouse_EdekaSuedwest</data>
  <data key="d3">1060</data>
  <data key="d6">0.0</data>
  <data key="d4">0.0</data>
</node>
<node id="739">
  <data key="d0">Eggs</data>
  <data key="d1">Segeberg</data>
  <data key="d2">Store_EdekaSuedwest</data>
  <data key="d3">1060</data>
  <data key="d6">0.0</data>
  <data key="d4">0.0</data>
</node>
<node id="740">
  <data key="d0">Eggs</data>
  <data key="d1">Segeberg</data>
  <data key="d2">Warehouse_Globus</data>
  <data key="d3">1060</data>
  <data key="d6">0.0</data>
  <data key="d4">0.0</data>
</node>
<node id="741">
  <data key="d0">Eggs</data>
  <data key="d1">Segeberg</data>
  <data key="d2">Store_Globus</data>
  <data key="d3">1060</data>
  <data key="d6">0.0</data>
  <data key="d4">0.0</data>
</node>
<node id="742">
  <data key="d0">Eggs</data>
  <data key="d1">Segeberg</data>
  <data key="d2">Warehouse_Kaes</data>
  <data key="d3">1060</data>
  <data key="d6">0.0</data>
  <data key="d4">0.0</data>
</node>
<node id="743">
  <data key="d0">Eggs</data>
  <data key="d1">Segeberg</data>
  <data key="d2">Store_Kaes</data>
  <data key="d3">1060</data>
  <data key="d6">0.0</data>
  <data key="d4">0.0</data>
</node>
<node id="744">
  <data key="d0">Eggs</data>
  <data key="d1">Segeberg</data>
  <data key="d2">Warehouse_KaisersTengelmann</data>
  <data key="d3">1060</data>
  <data key="d6">0.0</data>
  <data key="d4">0.0</data>
</node>
<node id="745">
  <data key="d0">Eggs</data>
  <data key="d1">Segeberg</data>
  <data key="d2">Store_KaisersTengelmann</data>
  <data key="d3">1060</data>
  <data key="d6">0.0</data>
  <data key="d4">0.0</data>
</node>
<node id="746">
  <data key="d0">Eggs</data>
  <data key="d1">Segeberg</data>
  <data key="d2">Warehouse_Kaufland</data>
  <data key="d3">1060</data>
  <data key="d6">0.0</data>
  <data key="d4">0.0</data>
</node>
<node id="747">
  <data key="d0">Eggs</data>
  <data key="d1">Segeberg</data>
  <data key="d2">Store_Kaufland</data>
  <data key="d3">1060</data>
  <data key="d6">50.33747270652198</data>
  <data key="d4">50.33747270652198</data>
</node>
<node id="748">
  <data key="d0">Eggs</data>
  <data key="d1">Segeberg</data>
  <data key="d2">Warehouse_KlaasKock</data>
  <data key="d3">1060</data>
  <data key="d6">0.0</data>
  <data key="d4">0.0</data>
</node>
<node id="749">
  <data key="d0">Eggs</data>
  <data key="d1">Segeberg</data>
  <data key="d2">Store_KlaasKock</data>
  <data key="d3">1060</data>
  <data key="d6">0.0</data>
  <data key="d4">0.0</data>
</node>
<node id="750">
  <data key="d0">Eggs</data>
  <data key="d1">Segeberg</data>
  <data key="d2">Warehouse_Lidl</data>
  <data key="d3">1060</data>
  <data key="d6">0.0</data>
  <data key="d4">0.0</data>
</node>
<node id="751">
  <data key="d0">Eggs</data>
  <data key="d1">Segeberg</data>
  <data key="d2">Store_Lidl</data>
  <data key="d3">1060</data>
  <data key="d6">200.3351685541062</data>
  <data key="d4">200.3351685541062</data>
</node>
<node id="752">
  <data key="d0">Eggs</data>
  <data key="d1">Segeberg</data>
  <data key="d2">Warehouse_Netto</data>
  <data key="d3">1060</data>
  <data key="d6">0.0</data>
  <data key="d4">0.0</data>
</node>
<node id="753">
  <data key="d0">Eggs</data>
  <data key="d1">Segeberg</data>
  <data key="d2">Store_Netto</data>
  <data key="d3">1060</data>
  <data key="d6">65.34086629939462</data>
  <data key="d4">65.34086629939462</data>
</node>
<node id="754">
  <data key="d0">Eggs</data>
  <data key="d1">Segeberg</data>
  <data key="d2">Warehouse_NettoNord</data>
  <data key="d3">1060</data>
  <data key="d6">0.0</data>
  <data key="d4">0.0</data>
</node>
<node id="755">
  <data key="d0">Eggs</data>
  <data key="d1">Segeberg</data>
  <data key="d2">Store_NettoNord</data>
  <data key="d3">1060</data>
  <data key="d6">49.25027027225584</data>
  <data key="d4">49.25027027225584</data>
</node>
<node id="756">
  <data key="d0">Eggs</data>
  <data key="d1">Segeberg</data>
  <data key="d2">Warehouse_Norma</data>
  <data key="d3">1060</data>
  <data key="d6">0.0</data>
  <data key="d4">0.0</data>
</node>
<node id="757">
  <data key="d0">Eggs</data>
  <data key="d1">Segeberg</data>
  <data key="d2">Store_Norma</data>
  <data key="d3">1060</data>
  <data key="d6">0.0</data>
  <data key="d4">0.0</data>
</node>
<node id="758">
  <data key="d0">Eggs</data>
  <data key="d1">Segeberg</data>
  <data key="d2">Warehouse_Penny</data>
  <data key="d3">1060</data>
  <data key="d6">4835.984742171771</data>
  <data key="d4">4835.984742171771</data>
</node>
<node id="759">
  <data key="d0">Eggs</data>
  <data key="d1">Segeberg</data>
  <data key="d2">Store_Penny</data>
  <data key="d3">1060</data>
  <data key="d6">169.42237933980576</data>
  <data key="d4">169.42237933980576</data>
</node>
<node id="760">
  <data key="d0">Eggs</data>
  <data key="d1">Segeberg</data>
  <data key="d2">Warehouse_Real</data>
  <data key="d3">1060</data>
  <data key="d6">0.0</data>
  <data key="d4">0.0</data>
</node>
<node id="761">
  <data key="d0">Eggs</data>
  <data key="d1">Segeberg</data>
  <data key="d2">Store_Real</data>
  <data key="d3">1060</data>
  <data key="d6">120.09962890526552</data>
  <data key="d4">120.09962890526552</data>
</node>
<node id="762">
  <data key="d0">Eggs</data>
  <data key="d1">Segeberg</data>
  <data key="d2">Warehouse_ReweHit</data>
  <data key="d3">1060</data>
  <data key="d6">0.0</data>
  <data key="d4">0.0</data>
</node>
<node id="763">
  <data key="d0">Eggs</data>
  <data key="d1">Segeberg</data>
  <data key="d2">Store_ReweHit</data>
  <data key="d3">1060</data>
  <data key="d6">195.877638573615</data>
  <data key="d4">195.877638573615</data>
</node>
<node id="764">
  <data key="d0">Eggs</data>
  <data key="d1">Segeberg</data>
  <data key="d2">Warehouse_Tegut</data>
  <data key="d3">1060</data>
  <data key="d6">0.0</data>
  <data key="d4">0.0</data>
</node>
<node id="765">
  <data key="d0">Eggs</data>
  <data key="d1">Segeberg</data>
  <data key="d2">Store_Tegut</data>
  <data key="d3">1060</data>
  <data key="d6">0.0</data>
  <data key="d4">0.0</data>
</node>
<node id="766">
  <data key="d0">Eggs</data>
  <data key="d1">Segeberg</data>
  <data key="d2">Warehouse_Wasgau</data>
  <data key="d3">1060</data>
  <data key="d6">0.0</data>
  <data key="d4">0.0</data>
</node>
<node id="767">
  <data key="d0">Eggs</data>
  <data key="d1">Segeberg</data>
  <data key="d2">Store_Wasgau</data>
  <data key="d3">1060</data>
  <data key="d6">0.0</data>
  <data key="d4">0.0</data>
</node>
<node id="768">
  <data key="d0">Eggs</data>
  <data key="d1">Steinburg</data>
  <data key="d2">Producer</data>
  <data key="d3">1061</data>
  <data key="d4">482.4423407392428</data>
</node>
<node id="769">
  <data key="d0">Eggs</data>
  <data key="d1">Steinburg</data>
  <data key="d2">Consumer</data>
  <data key="d3">1061</data>
  <data key="d5">1213.6964542111589</data>
</node>
<node id="770">
  <data key="d0">Eggs</data>
  <data key="d1">Steinburg</data>
  <data key="d2">Wholesale</data>
  <data key="d3">1061</data>
  <data key="d6">200.25991494484126</data>
  <data key="d4">200.25991494484126</data>
</node>
<node id="771">
  <data key="d0">Eggs</data>
  <data key="d1">Steinburg</data>
  <data key="d2">Warehouse_AldiNord</data>
  <data key="d3">1061</data>
  <data key="d6">1512.4485291843453</data>
  <data key="d4">1512.4485291843453</data>
</node>
<node id="772">
  <data key="d0">Eggs</data>
  <data key="d1">Steinburg</data>
  <data key="d2">Store_AldiNord</data>
  <data key="d3">1061</data>
  <data key="d6">200.53012482243494</data>
  <data key="d4">200.53012482243494</data>
</node>
<node id="773">
  <data key="d0">Eggs</data>
  <data key="d1">Steinburg</data>
  <data key="d2">Warehouse_AldiSued</data>
  <data key="d3">1061</data>
  <data key="d6">0.0</data>
  <data key="d4">0.0</data>
</node>
<node id="774">
  <data key="d0">Eggs</data>
  <data key="d1">Steinburg</data>
  <data key="d2">Store_AldiSued</data>
  <data key="d3">1061</data>
  <data key="d6">0.0</data>
  <data key="d4">0.0</data>
</node>
<node id="775">
  <data key="d0">Eggs</data>
  <data key="d1">Steinburg</data>
  <data key="d2">Warehouse_Alnatura</data>
  <data key="d3">1061</data>
  <data key="d6">0.0</data>
  <data key="d4">0.0</data>
</node>
<node id="776">
  <data key="d0">Eggs</data>
  <data key="d1">Steinburg</data>
  <data key="d2">Store_Alnatura</data>
  <data key="d3">1061</data>
  <data key="d6">0.0</data>
  <data key="d4">0.0</data>
</node>
<node id="777">
  <data key="d0">Eggs</data>
  <data key="d1">Steinburg</data>
  <data key="d2">Warehouse_BartelsLangness</data>
  <data key="d3">1061</data>
  <data key="d6">0.0</data>
  <data key="d4">0.0</data>
</node>
<node id="778">
  <data key="d0">Eggs</data>
  <data key="d1">Steinburg</data>
  <data key="d2">Store_BartelsLangness</data>
  <data key="d3">1061</data>
  <data key="d6">39.90361532155158</data>
  <data key="d4">39.90361532155158</data>
</node>
<node id="779">
  <data key="d0">Eggs</data>
  <data key="d1">Steinburg</data>
  <data key="d2">Warehouse_Buenting</data>
  <data key="d3">1061</data>
  <data key="d6">0.0</data>
  <data key="d4">0.0</data>
</node>
<node id="780">
  <data key="d0">Eggs</data>
  <data key="d1">Steinburg</data>
  <data key="d2">Store_Buenting</data>
  <data key="d3">1061</data>
  <data key="d6">0.0</data>
  <data key="d4">0.0</data>
</node>
<node id="781">
  <data key="d0">Eggs</data>
  <data key="d1">Steinburg</data>
  <data key="d2">Warehouse_Coop</data>
  <data key="d3">1061</data>
  <data key="d6">0.0</data>
  <data key="d4">0.0</data>
</node>
<node id="782">
  <data key="d0">Eggs</data>
  <data key="d1">Steinburg</data>
  <data key="d2">Store_Coop</data>
  <data key="d3">1061</data>
  <data key="d6">194.06024516432106</data>
  <data key="d4">194.06024516432106</data>
</node>
<node id="783">
  <data key="d0">Eggs</data>
  <data key="d1">Steinburg</data>
  <data key="d2">Warehouse_Dennree</data>
  <data key="d3">1061</data>
  <data key="d6">0.0</data>
  <data key="d4">0.0</data>
</node>
<node id="784">
  <data key="d0">Eggs</data>
  <data key="d1">Steinburg</data>
  <data key="d2">Store_Dennree</data>
  <data key="d3">1061</data>
  <data key="d6">0.0</data>
  <data key="d4">0.0</data>
</node>
<node id="785">
  <data key="d0">Eggs</data>
  <data key="d1">Steinburg</data>
  <data key="d2">Warehouse_EdekaHessenring</data>
  <data key="d3">1061</data>
  <data key="d6">0.0</data>
  <data key="d4">0.0</data>
</node>
<node id="786">
  <data key="d0">Eggs</data>
  <data key="d1">Steinburg</data>
  <data key="d2">Store_EdekaHessenring</data>
  <data key="d3">1061</data>
  <data key="d6">0.0</data>
  <data key="d4">0.0</data>
</node>
<node id="787">
  <data key="d0">Eggs</data>
  <data key="d1">Steinburg</data>
  <data key="d2">Warehouse_EdekaMindenHannover</data>
  <data key="d3">1061</data>
  <data key="d6">0.0</data>
  <data key="d4">0.0</data>
</node>
<node id="788">
  <data key="d0">Eggs</data>
  <data key="d1">Steinburg</data>
  <data key="d2">Store_EdekaMindenHannover</data>
  <data key="d3">1061</data>
  <data key="d6">0.0</data>
  <data key="d4">0.0</data>
</node>
<node id="789">
  <data key="d0">Eggs</data>
  <data key="d1">Steinburg</data>
  <data key="d2">Warehouse_EdekaNord</data>
  <data key="d3">1061</data>
  <data key="d6">0.0</data>
  <data key="d4">0.0</data>
</node>
<node id="790">
  <data key="d0">Eggs</data>
  <data key="d1">Steinburg</data>
  <data key="d2">Store_EdekaNord</data>
  <data key="d3">1061</data>
  <data key="d6">283.15663263499556</data>
  <data key="d4">283.15663263499556</data>
</node>
<node id="791">
  <data key="d0">Eggs</data>
  <data key="d1">Steinburg</data>
  <data key="d2">Warehouse_EdekaNordbayern</data>
  <data key="d3">1061</data>
  <data key="d6">0.0</data>
  <data key="d4">0.0</data>
</node>
<node id="792">
  <data key="d0">Eggs</data>
  <data key="d1">Steinburg</data>
  <data key="d2">Store_EdekaNordbayern</data>
  <data key="d3">1061</data>
  <data key="d6">0.0</data>
  <data key="d4">0.0</data>
</node>
<node id="793">
  <data key="d0">Eggs</data>
  <data key="d1">Steinburg</data>
  <data key="d2">Warehouse_EdekaRheinRuhr</data>
  <data key="d3">1061</data>
  <data key="d6">0.0</data>
  <data key="d4">0.0</data>
</node>
<node id="794">
  <data key="d0">Eggs</data>
  <data key="d1">Steinburg</data>
  <data key="d2">Store_EdekaRheinRuhr</data>
  <data key="d3">1061</data>
  <data key="d6">0.0</data>
  <data key="d4">0.0</data>
</node>
<node id="795">
  <data key="d0">Eggs</data>
  <data key="d1">Steinburg</data>
  <data key="d2">Warehouse_EdekaSuedbayern</data>
  <data key="d3">1061</data>
  <data key="d6">0.0</data>
  <data key="d4">0.0</data>
</node>
<node id="796">
  <data key="d0">Eggs</data>
  <data key="d1">Steinburg</data>
  <data key="d2">Store_EdekaSuedbayern</data>
  <data key="d3">1061</data>
  <data key="d6">0.0</data>
  <data key="d4">0.0</data>
</node>
<node id="797">
  <data key="d0">Eggs</data>
  <data key="d1">Steinburg</data>
  <data key="d2">Warehouse_EdekaSuedwest</data>
  <data key="d3">1061</data>
  <data key="d6">0.0</data>
  <data key="d4">0.0</data>
</node>
<node id="798">
  <data key="d0">Eggs</data>
  <data key="d1">Steinburg</data>
  <data key="d2">Store_EdekaSuedwest</data>
  <data key="d3">1061</data>
  <data key="d6">0.0</data>
  <data key="d4">0.0</data>
</node>
<node id="799">
  <data key="d0">Eggs</data>
  <data key="d1">Steinburg</data>
  <data key="d2">Warehouse_Globus</data>
  <data key="d3">1061</data>
  <data key="d6">0.0</data>
  <data key="d4">0.0</data>
</node>
<node id="800">
  <data key="d0">Eggs</data>
  <data key="d1">Steinburg</data>
  <data key="d2">Store_Globus</data>
  <data key="d3">1061</data>
  <data key="d6">0.0</data>
  <data key="d4">0.0</data>
</node>
<node id="801">
  <data key="d0">Eggs</data>
  <data key="d1">Steinburg</data>
  <data key="d2">Warehouse_Kaes</data>
  <data key="d3">1061</data>
  <data key="d6">0.0</data>
  <data key="d4">0.0</data>
</node>
<node id="802">
  <data key="d0">Eggs</data>
  <data key="d1">Steinburg</data>
  <data key="d2">Store_Kaes</data>
  <data key="d3">1061</data>
  <data key="d6">0.0</data>
  <data key="d4">0.0</data>
</node>
<node id="803">
  <data key="d0">Eggs</data>
  <data key="d1">Steinburg</data>
  <data key="d2">Warehouse_KaisersTengelmann</data>
  <data key="d3">1061</data>
  <data key="d6">0.0</data>
  <data key="d4">0.0</data>
</node>
<node id="804">
  <data key="d0">Eggs</data>
  <data key="d1">Steinburg</data>
  <data key="d2">Store_KaisersTengelmann</data>
  <data key="d3">1061</data>
  <data key="d6">0.0</data>
  <data key="d4">0.0</data>
</node>
<node id="805">
  <data key="d0">Eggs</data>
  <data key="d1">Steinburg</data>
  <data key="d2">Warehouse_Kaufland</data>
  <data key="d3">1061</data>
  <data key="d6">0.0</data>
  <data key="d4">0.0</data>
</node>
<node id="806">
  <data key="d0">Eggs</data>
  <data key="d1">Steinburg</data>
  <data key="d2">Store_Kaufland</data>
  <data key="d3">1061</data>
  <data key="d6">0.0</data>
  <data key="d4">0.0</data>
</node>
<node id="807">
  <data key="d0">Eggs</data>
  <data key="d1">Steinburg</data>
  <data key="d2">Warehouse_KlaasKock</data>
  <data key="d3">1061</data>
  <data key="d6">0.0</data>
  <data key="d4">0.0</data>
</node>
<node id="808">
  <data key="d0">Eggs</data>
  <data key="d1">Steinburg</data>
  <data key="d2">Store_KlaasKock</data>
  <data key="d3">1061</data>
  <data key="d6">0.0</data>
  <data key="d4">0.0</data>
</node>
<node id="809">
  <data key="d0">Eggs</data>
  <data key="d1">Steinburg</data>
  <data key="d2">Warehouse_Lidl</data>
  <data key="d3">1061</data>
  <data key="d6">0.0</data>
  <data key="d4">0.0</data>
</node>
<node id="810">
  <data key="d0">Eggs</data>
  <data key="d1">Steinburg</data>
  <data key="d2">Store_Lidl</data>
  <data key="d3">1061</data>
  <data key="d6">79.91566438038998</data>
  <data key="d4">79.91566438038998</data>
</node>
<node id="811">
  <data key="d0">Eggs</data>
  <data key="d1">Steinburg</data>
  <data key="d2">Warehouse_Netto</data>
  <data key="d3">1061</data>
  <data key="d6">0.0</data>
  <data key="d4">0.0</data>
</node>
<node id="812">
  <data key="d0">Eggs</data>
  <data key="d1">Steinburg</data>
  <data key="d2">Store_Netto</data>
  <data key="d3">1061</data>
  <data key="d6">65.1686761093818</data>
  <data key="d4">65.1686761093818</data>
</node>
<node id="813">
  <data key="d0">Eggs</data>
  <data key="d1">Steinburg</data>
  <data key="d2">Warehouse_NettoNord</data>
  <data key="d3">1061</data>
  <data key="d6">0.0</data>
  <data key="d4">0.0</data>
</node>
<node id="814">
  <data key="d0">Eggs</data>
  <data key="d1">Steinburg</data>
  <data key="d2">Store_NettoNord</data>
  <data key="d3">1061</data>
  <data key="d6">12.289156892506828</data>
  <data key="d4">12.289156892506828</data>
</node>
<node id="815">
  <data key="d0">Eggs</data>
  <data key="d1">Steinburg</data>
  <data key="d2">Warehouse_Norma</data>
  <data key="d3">1061</data>
  <data key="d6">0.0</data>
  <data key="d4">0.0</data>
</node>
<node id="816">
  <data key="d0">Eggs</data>
  <data key="d1">Steinburg</data>
  <data key="d2">Store_Norma</data>
  <data key="d3">1061</data>
  <data key="d6">0.0</data>
  <data key="d4">0.0</data>
</node>
<node id="817">
  <data key="d0">Eggs</data>
  <data key="d1">Steinburg</data>
  <data key="d2">Warehouse_Penny</data>
  <data key="d3">1061</data>
  <data key="d6">0.0</data>
  <data key="d4">0.0</data>
</node>
<node id="818">
  <data key="d0">Eggs</data>
  <data key="d1">Steinburg</data>
  <data key="d2">Store_Penny</data>
  <data key="d3">1061</data>
  <data key="d6">84.46988134643664</data>
  <data key="d4">84.46988134643664</data>
</node>
<node id="819">
  <data key="d0">Eggs</data>
  <data key="d1">Steinburg</data>
  <data key="d2">Warehouse_Real</data>
  <data key="d3">1061</data>
  <data key="d6">0.0</data>
  <data key="d4">0.0</data>
</node>
<node id="820">
  <data key="d0">Eggs</data>
  <data key="d1">Steinburg</data>
  <data key="d2">Store_Real</data>
  <data key="d3">1061</data>
  <data key="d6">0.0</data>
  <data key="d4">0.0</data>
</node>
<node id="821">
  <data key="d0">Eggs</data>
  <data key="d1">Steinburg</data>
  <data key="d2">Warehouse_ReweHit</data>
  <data key="d3">1061</data>
  <data key="d6">0.0</data>
  <data key="d4">0.0</data>
</node>
<node id="822">
  <data key="d0">Eggs</data>
  <data key="d1">Steinburg</data>
  <data key="d2">Store_ReweHit</data>
  <data key="d3">1061</data>
  <data key="d6">33.79518145439378</data>
  <data key="d4">33.79518145439378</data>
</node>
<node id="823">
  <data key="d0">Eggs</data>
  <data key="d1">Steinburg</data>
  <data key="d2">Warehouse_Tegut</data>
  <data key="d3">1061</data>
  <data key="d6">0.0</data>
  <data key="d4">0.0</data>
</node>
<node id="824">
  <data key="d0">Eggs</data>
  <data key="d1">Steinburg</data>
  <data key="d2">Store_Tegut</data>
  <data key="d3">1061</data>
  <data key="d6">0.0</data>
  <data key="d4">0.0</data>
</node>
<node id="825">
  <data key="d0">Eggs</data>
  <data key="d1">Steinburg</data>
  <data key="d2">Warehouse_Wasgau</data>
  <data key="d3">1061</data>
  <data key="d6">0.0</data>
  <data key="d4">0.0</data>
</node>
<node id="826">
  <data key="d0">Eggs</data>
  <data key="d1">Steinburg</data>
  <data key="d2">Store_Wasgau</data>
  <data key="d3">1061</data>
  <data key="d6">0.0</data>
  <data key="d4">0.0</data>
</node>
<node id="827">
  <data key="d0">Eggs</data>
  <data key="d1">Stormarn</data>
  <data key="d2">Producer</data>
  <data key="d3">1062</data>
  <data key="d4">490.07097003247605</data>
</node>
<node id="828">
  <data key="d0">Eggs</data>
  <data key="d1">Stormarn</data>
  <data key="d2">Consumer</data>
  <data key="d3">1062</data>
  <data key="d5">2172.2307976084476</data>
</node>
<node id="829">
  <data key="d0">Eggs</data>
  <data key="d1">Stormarn</data>
  <data key="d2">Wholesale</data>
  <data key="d3">1062</data>
  <data key="d6">358.4180816053938</data>
  <data key="d4">358.4180816053938</data>
</node>
<node id="830">
  <data key="d0">Eggs</data>
  <data key="d1">Stormarn</data>
  <data key="d2">Warehouse_AldiNord</data>
  <data key="d3">1062</data>
  <data key="d6">1379.6909544430946</data>
  <data key="d4">1379.6909544430946</data>
</node>
<node id="831">
  <data key="d0">Eggs</data>
  <data key="d1">Stormarn</data>
  <data key="d2">Store_AldiNord</data>
  <data key="d3">1062</data>
  <data key="d6">327.7739872973719</data>
  <data key="d4">327.7739872973719</data>
</node>
<node id="832">
  <data key="d0">Eggs</data>
  <data key="d1">Stormarn</data>
  <data key="d2">Warehouse_AldiSued</data>
  <data key="d3">1062</data>
  <data key="d6">0.0</data>
  <data key="d4">0.0</data>
</node>
<node id="833">
  <data key="d0">Eggs</data>
  <data key="d1">Stormarn</data>
  <data key="d2">Store_AldiSued</data>
  <data key="d3">1062</data>
  <data key="d6">0.0</data>
  <data key="d4">0.0</data>
</node>
<node id="834">
  <data key="d0">Eggs</data>
  <data key="d1">Stormarn</data>
  <data key="d2">Warehouse_Alnatura</data>
  <data key="d3">1062</data>
  <data key="d6">0.0</data>
  <data key="d4">0.0</data>
</node>
<node id="835">
  <data key="d0">Eggs</data>
  <data key="d1">Stormarn</data>
  <data key="d2">Store_Alnatura</data>
  <data key="d3">1062</data>
  <data key="d6">0.0</data>
  <data key="d4">0.0</data>
</node>
<node id="836">
  <data key="d0">Eggs</data>
  <data key="d1">Stormarn</data>
  <data key="d2">Warehouse_BartelsLangness</data>
  <data key="d3">1062</data>
  <data key="d6">0.0</data>
  <data key="d4">0.0</data>
</node>
<node id="837">
  <data key="d0">Eggs</data>
  <data key="d1">Stormarn</data>
  <data key="d2">Store_BartelsLangness</data>
  <data key="d3">1062</data>
  <data key="d6">338.49264294509095</data>
  <data key="d4">338.49264294509095</data>
</node>
<node id="838">
  <data key="d0">Eggs</data>
  <data key="d1">Stormarn</data>
  <data key="d2">Warehouse_Buenting</data>
  <data key="d3">1062</data>
  <data key="d6">0.0</data>
  <data key="d4">0.0</data>
</node>
<node id="839">
  <data key="d0">Eggs</data>
  <data key="d1">Stormarn</data>
  <data key="d2">Store_Buenting</data>
  <data key="d3">1062</data>
  <data key="d6">0.0</data>
  <data key="d4">0.0</data>
</node>
<node id="840">
  <data key="d0">Eggs</data>
  <data key="d1">Stormarn</data>
  <data key="d2">Warehouse_Coop</data>
  <data key="d3">1062</data>
  <data key="d6">0.0</data>
  <data key="d4">0.0</data>
</node>
<node id="841">
  <data key="d0">Eggs</data>
  <data key="d1">Stormarn</data>
  <data key="d2">Store_Coop</data>
  <data key="d3">1062</data>
  <data key="d6">100.97223861139297</data>
  <data key="d4">100.97223861139297</data>
</node>
<node id="842">
  <data key="d0">Eggs</data>
  <data key="d1">Stormarn</data>
  <data key="d2">Warehouse_Dennree</data>
  <data key="d3">1062</data>
  <data key="d6">0.0</data>
  <data key="d4">0.0</data>
</node>
<node id="843">
  <data key="d0">Eggs</data>
  <data key="d1">Stormarn</data>
  <data key="d2">Store_Dennree</data>
  <data key="d3">1062</data>
  <data key="d6">2.6692372041012598</data>
  <data key="d4">2.6692372041012598</data>
</node>
<node id="844">
  <data key="d0">Eggs</data>
  <data key="d1">Stormarn</data>
  <data key="d2">Warehouse_EdekaHessenring</data>
  <data key="d3">1062</data>
  <data key="d6">0.0</data>
  <data key="d4">0.0</data>
</node>
<node id="845">
  <data key="d0">Eggs</data>
  <data key="d1">Stormarn</data>
  <data key="d2">Store_EdekaHessenring</data>
  <data key="d3">1062</data>
  <data key="d6">0.0</data>
  <data key="d4">0.0</data>
</node>
<node id="846">
  <data key="d0">Eggs</data>
  <data key="d1">Stormarn</data>
  <data key="d2">Warehouse_EdekaMindenHannover</data>
  <data key="d3">1062</data>
  <data key="d6">0.0</data>
  <data key="d4">0.0</data>
</node>
<node id="847">
  <data key="d0">Eggs</data>
  <data key="d1">Stormarn</data>
  <data key="d2">Store_EdekaMindenHannover</data>
  <data key="d3">1062</data>
  <data key="d6">0.0</data>
  <data key="d4">0.0</data>
</node>
<node id="848">
  <data key="d0">Eggs</data>
  <data key="d1">Stormarn</data>
  <data key="d2">Warehouse_EdekaNord</data>
  <data key="d3">1062</data>
  <data key="d6">0.0</data>
  <data key="d4">0.0</data>
</node>
<node id="849">
  <data key="d0">Eggs</data>
  <data key="d1">Stormarn</data>
  <data key="d2">Store_EdekaNord</data>
  <data key="d3">1062</data>
  <data key="d6">395.7561223393258</data>
  <data key="d4">395.7561223393258</data>
</node>
<node id="850">
  <data key="d0">Eggs</data>
  <data key="d1">Stormarn</data>
  <data key="d2">Warehouse_EdekaNordbayern</data>
  <data key="d3">1062</data>
  <data key="d6">0.0</data>
  <data key="d4">0.0</data>
</node>
<node id="851">
  <data key="d0">Eggs</data>
  <data key="d1">Stormarn</data>
  <data key="d2">Store_EdekaNordbayern</data>
  <data key="d3">1062</data>
  <data key="d6">0.0</data>
  <data key="d4">0.0</data>
</node>
<node id="852">
  <data key="d0">Eggs</data>
  <data key="d1">Stormarn</data>
  <data key="d2">Warehouse_EdekaRheinRuhr</data>
  <data key="d3">1062</data>
  <data key="d6">0.0</data>
  <data key="d4">0.0</data>
</node>
<node id="853">
  <data key="d0">Eggs</data>
  <data key="d1">Stormarn</data>
  <data key="d2">Store_EdekaRheinRuhr</data>
  <data key="d3">1062</data>
  <data key="d6">0.0</data>
  <data key="d4">0.0</data>
</node>
<node id="854">
  <data key="d0">Eggs</data>
  <data key="d1">Stormarn</data>
  <data key="d2">Warehouse_EdekaSuedbayern</data>
  <data key="d3">1062</data>
  <data key="d6">0.0</data>
  <data key="d4">0.0</data>
</node>
<node id="855">
  <data key="d0">Eggs</data>
  <data key="d1">Stormarn</data>
  <data key="d2">Store_EdekaSuedbayern</data>
  <data key="d3">1062</data>
  <data key="d6">0.0</data>
  <data key="d4">0.0</data>
</node>
<node id="856">
  <data key="d0">Eggs</data>
  <data key="d1">Stormarn</data>
  <data key="d2">Warehouse_EdekaSuedwest</data>
  <data key="d3">1062</data>
  <data key="d6">0.0</data>
  <data key="d4">0.0</data>
</node>
<node id="857">
  <data key="d0">Eggs</data>
  <data key="d1">Stormarn</data>
  <data key="d2">Store_EdekaSuedwest</data>
  <data key="d3">1062</data>
  <data key="d6">0.0</data>
  <data key="d4">0.0</data>
</node>
<node id="858">
  <data key="d0">Eggs</data>
  <data key="d1">Stormarn</data>
  <data key="d2">Warehouse_Globus</data>
  <data key="d3">1062</data>
  <data key="d6">0.0</data>
  <data key="d4">0.0</data>
</node>
<node id="859">
  <data key="d0">Eggs</data>
  <data key="d1">Stormarn</data>
  <data key="d2">Store_Globus</data>
  <data key="d3">1062</data>
  <data key="d6">0.0</data>
  <data key="d4">0.0</data>
</node>
<node id="860">
  <data key="d0">Eggs</data>
  <data key="d1">Stormarn</data>
  <data key="d2">Warehouse_Kaes</data>
  <data key="d3">1062</data>
  <data key="d6">0.0</data>
  <data key="d4">0.0</data>
</node>
<node id="861">
  <data key="d0">Eggs</data>
  <data key="d1">Stormarn</data>
  <data key="d2">Store_Kaes</data>
  <data key="d3">1062</data>
  <data key="d6">0.0</data>
  <data key="d4">0.0</data>
</node>
<node id="862">
  <data key="d0">Eggs</data>
  <data key="d1">Stormarn</data>
  <data key="d2">Warehouse_KaisersTengelmann</data>
  <data key="d3">1062</data>
  <data key="d6">0.0</data>
  <data key="d4">0.0</data>
</node>
<node id="863">
  <data key="d0">Eggs</data>
  <data key="d1">Stormarn</data>
  <data key="d2">Store_KaisersTengelmann</data>
  <data key="d3">1062</data>
  <data key="d6">0.0</data>
  <data key="d4">0.0</data>
</node>
<node id="864">
  <data key="d0">Eggs</data>
  <data key="d1">Stormarn</data>
  <data key="d2">Warehouse_Kaufland</data>
  <data key="d3">1062</data>
  <data key="d6">0.0</data>
  <data key="d4">0.0</data>
</node>
<node id="865">
  <data key="d0">Eggs</data>
  <data key="d1">Stormarn</data>
  <data key="d2">Store_Kaufland</data>
  <data key="d3">1062</data>
  <data key="d6">0.0</data>
  <data key="d4">0.0</data>
</node>
<node id="866">
  <data key="d0">Eggs</data>
  <data key="d1">Stormarn</data>
  <data key="d2">Warehouse_KlaasKock</data>
  <data key="d3">1062</data>
  <data key="d6">0.0</data>
  <data key="d4">0.0</data>
</node>
<node id="867">
  <data key="d0">Eggs</data>
  <data key="d1">Stormarn</data>
  <data key="d2">Store_KlaasKock</data>
  <data key="d3">1062</data>
  <data key="d6">0.0</data>
  <data key="d4">0.0</data>
</node>
<node id="868">
  <data key="d0">Eggs</data>
  <data key="d1">Stormarn</data>
  <data key="d2">Warehouse_Lidl</data>
  <data key="d3">1062</data>
  <data key="d6">1530.0156484323952</data>
  <data key="d4">1530.0156484323952</data>
</node>
<node id="869">
  <data key="d0">Eggs</data>
  <data key="d1">Stormarn</data>
  <data key="d2">Store_Lidl</data>
  <data key="d3">1062</data>
  <data key="d6">184.4276080708714</data>
  <data key="d4">184.4276080708714</data>
</node>
<node id="870">
  <data key="d0">Eggs</data>
  <data key="d1">Stormarn</data>
  <data key="d2">Warehouse_Netto</data>
  <data key="d3">1062</data>
  <data key="d6">0.0</data>
  <data key="d4">0.0</data>
</node>
<node id="871">
  <data key="d0">Eggs</data>
  <data key="d1">Stormarn</data>
  <data key="d2">Store_Netto</data>
  <data key="d3">1062</data>
  <data key="d6">12.553756225538736</data>
  <data key="d4">12.553756225538736</data>
</node>
<node id="872">
  <data key="d0">Eggs</data>
  <data key="d1">Stormarn</data>
  <data key="d2">Warehouse_NettoNord</data>
  <data key="d3">1062</data>
  <data key="d6">0.0</data>
  <data key="d4">0.0</data>
</node>
<node id="873">
  <data key="d0">Eggs</data>
  <data key="d1">Stormarn</data>
  <data key="d2">Store_NettoNord</data>
  <data key="d3">1062</data>
  <data key="d6">56.679583755837676</data>
  <data key="d4">56.679583755837676</data>
</node>
<node id="874">
  <data key="d0">Eggs</data>
  <data key="d1">Stormarn</data>
  <data key="d2">Warehouse_Norma</data>
  <data key="d3">1062</data>
  <data key="d6">0.0</data>
  <data key="d4">0.0</data>
</node>
<node id="875">
  <data key="d0">Eggs</data>
  <data key="d1">Stormarn</data>
  <data key="d2">Store_Norma</data>
  <data key="d3">1062</data>
  <data key="d6">9.34233021435441</data>
  <data key="d4">9.34233021435441</data>
</node>
<node id="876">
  <data key="d0">Eggs</data>
  <data key="d1">Stormarn</data>
  <data key="d2">Warehouse_Penny</data>
  <data key="d3">1062</data>
  <data key="d6">0.0</data>
  <data key="d4">0.0</data>
</node>
<node id="877">
  <data key="d0">Eggs</data>
  <data key="d1">Stormarn</data>
  <data key="d2">Store_Penny</data>
  <data key="d3">1062</data>
  <data key="d6">167.1192730755273</data>
  <data key="d4">167.1192730755273</data>
</node>
<node id="878">
  <data key="d0">Eggs</data>
  <data key="d1">Stormarn</data>
  <data key="d2">Warehouse_Real</data>
  <data key="d3">1062</data>
  <data key="d6">0.0</data>
  <data key="d4">0.0</data>
</node>
<node id="879">
  <data key="d0">Eggs</data>
  <data key="d1">Stormarn</data>
  <data key="d2">Store_Real</data>
  <data key="d3">1062</data>
  <data key="d6">138.21643897486834</data>
  <data key="d4">138.21643897486834</data>
</node>
<node id="880">
  <data key="d0">Eggs</data>
  <data key="d1">Stormarn</data>
  <data key="d2">Warehouse_ReweHit</data>
  <data key="d3">1062</data>
  <data key="d6">0.0</data>
  <data key="d4">0.0</data>
</node>
<node id="881">
  <data key="d0">Eggs</data>
  <data key="d1">Stormarn</data>
  <data key="d2">Store_ReweHit</data>
  <data key="d3">1062</data>
  <data key="d6">43.75046604847221</data>
  <data key="d4">43.75046604847221</data>
</node>
<node id="882">
  <data key="d0">Eggs</data>
  <data key="d1">Stormarn</data>
  <data key="d2">Warehouse_Tegut</data>
  <data key="d3">1062</data>
  <data key="d6">0.0</data>
  <data key="d4">0.0</data>
</node>
<node id="883">
  <data key="d0">Eggs</data>
  <data key="d1">Stormarn</data>
  <data key="d2">Store_Tegut</data>
  <data key="d3">1062</data>
  <data key="d6">0.0</data>
  <data key="d4">0.0</data>
</node>
<node id="884">
  <data key="d0">Eggs</data>
  <data key="d1">Stormarn</data>
  <data key="d2">Warehouse_Wasgau</data>
  <data key="d3">1062</data>
  <data key="d6">0.0</data>
  <data key="d4">0.0</data>
</node>
<node id="885">
  <data key="d0">Eggs</data>
  <data key="d1">Stormarn</data>
  <data key="d2">Store_Wasgau</data>
  <data key="d3">1062</data>
  <data key="d6">0.0</data>
  <data key="d4">0.0</data>
</node>
<node id="886">
  <data key="d0">Eggs</data>
  <data key="d1">Hamburg; Freie und Hansestadt</data>
  <data key="d2">Producer</data>
  <data key="d3">2000</data>
  <data key="d4">58.27099144754315</data>
</node>
<node id="887">
  <data key="d0">Eggs</data>
  <data key="d1">Hamburg; Freie und Hansestadt</data>
  <data key="d2">Consumer</data>
  <data key="d3">2000</data>
  <data key="d5">16174.586214605562</data>
</node>
<node id="888">
  <data key="d0">Eggs</data>
  <data key="d1">Hamburg; Freie und Hansestadt</data>
  <data key="d2">Wholesale</data>
  <data key="d3">2000</data>
  <data key="d6">2668.8067254099183</data>
  <data key="d4">2668.8067254099183</data>
</node>
<node id="889">
  <data key="d0">Eggs</data>
  <data key="d1">Hamburg; Freie und Hansestadt</data>
  <data key="d2">Warehouse_AldiNord</data>
  <data key="d3">2000</data>
  <data key="d6">0.0</data>
  <data key="d4">0.0</data>
</node>
<node id="890">
  <data key="d0">Eggs</data>
  <data key="d1">Hamburg; Freie und Hansestadt</data>
  <data key="d2">Store_AldiNord</data>
  <data key="d3">2000</data>
  <data key="d6">2114.7358603642315</data>
  <data key="d4">2114.7358603642315</data>
</node>
<node id="891">
  <data key="d0">Eggs</data>
  <data key="d1">Hamburg; Freie und Hansestadt</data>
  <data key="d2">Warehouse_AldiSued</data>
  <data key="d3">2000</data>
  <data key="d6">0.0</data>
  <data key="d4">0.0</data>
</node>
<node id="892">
  <data key="d0">Eggs</data>
  <data key="d1">Hamburg; Freie und Hansestadt</data>
  <data key="d2">Store_AldiSued</data>
  <data key="d3">2000</data>
  <data key="d6">0.0</data>
  <data key="d4">0.0</data>
</node>
<node id="893">
  <data key="d0">Eggs</data>
  <data key="d1">Hamburg; Freie und Hansestadt</data>
  <data key="d2">Warehouse_Alnatura</data>
  <data key="d3">2000</data>
  <data key="d6">0.0</data>
  <data key="d4">0.0</data>
</node>
<node id="894">
  <data key="d0">Eggs</data>
  <data key="d1">Hamburg; Freie und Hansestadt</data>
  <data key="d2">Store_Alnatura</data>
  <data key="d3">2000</data>
  <data key="d6">196.89613418223664</data>
  <data key="d4">196.89613418223664</data>
</node>
<node id="895">
  <data key="d0">Eggs</data>
  <data key="d1">Hamburg; Freie und Hansestadt</data>
  <data key="d2">Warehouse_BartelsLangness</data>
  <data key="d3">2000</data>
  <data key="d6">0.0</data>
  <data key="d4">0.0</data>
</node>
<node id="896">
  <data key="d0">Eggs</data>
  <data key="d1">Hamburg; Freie und Hansestadt</data>
  <data key="d2">Store_BartelsLangness</data>
  <data key="d3">2000</data>
  <data key="d6">277.27318768169954</data>
  <data key="d4">277.27318768169954</data>
</node>
<node id="897">
  <data key="d0">Eggs</data>
  <data key="d1">Hamburg; Freie und Hansestadt</data>
  <data key="d2">Warehouse_Buenting</data>
  <data key="d3">2000</data>
  <data key="d6">0.0</data>
  <data key="d4">0.0</data>
</node>
<node id="898">
  <data key="d0">Eggs</data>
  <data key="d1">Hamburg; Freie und Hansestadt</data>
  <data key="d2">Store_Buenting</data>
  <data key="d3">2000</data>
  <data key="d6">0.0</data>
  <data key="d4">0.0</data>
</node>
<node id="899">
  <data key="d0">Eggs</data>
  <data key="d1">Hamburg; Freie und Hansestadt</data>
  <data key="d2">Warehouse_Coop</data>
  <data key="d3">2000</data>
  <data key="d6">0.0</data>
  <data key="d4">0.0</data>
</node>
<node id="900">
  <data key="d0">Eggs</data>
  <data key="d1">Hamburg; Freie und Hansestadt</data>
  <data key="d2">Store_Coop</data>
  <data key="d3">2000</data>
  <data key="d6">232.03281985836205</data>
  <data key="d4">232.03281985836205</data>
</node>
<node id="901">
  <data key="d0">Eggs</data>
  <data key="d1">Hamburg; Freie und Hansestadt</data>
  <data key="d2">Warehouse_Dennree</data>
  <data key="d3">2000</data>
  <data key="d6">0.0</data>
  <data key="d4">0.0</data>
</node>
<node id="902">
  <data key="d0">Eggs</data>
  <data key="d1">Hamburg; Freie und Hansestadt</data>
  <data key="d2">Store_Dennree</data>
  <data key="d3">2000</data>
  <data key="d6">138.4355255394127</data>
  <data key="d4">138.4355255394127</data>
</node>
<node id="903">
  <data key="d0">Eggs</data>
  <data key="d1">Hamburg; Freie und Hansestadt</data>
  <data key="d2">Warehouse_EdekaHessenring</data>
  <data key="d3">2000</data>
  <data key="d6">0.0</data>
  <data key="d4">0.0</data>
</node>
<node id="904">
  <data key="d0">Eggs</data>
  <data key="d1">Hamburg; Freie und Hansestadt</data>
  <data key="d2">Store_EdekaHessenring</data>
  <data key="d3">2000</data>
  <data key="d6">0.0</data>
  <data key="d4">0.0</data>
</node>
<node id="905">
  <data key="d0">Eggs</data>
  <data key="d1">Hamburg; Freie und Hansestadt</data>
  <data key="d2">Warehouse_EdekaMindenHannover</data>
  <data key="d3">2000</data>
  <data key="d6">0.0</data>
  <data key="d4">0.0</data>
</node>
<node id="906">
  <data key="d0">Eggs</data>
  <data key="d1">Hamburg; Freie und Hansestadt</data>
  <data key="d2">Store_EdekaMindenHannover</data>
  <data key="d3">2000</data>
  <data key="d6">0.0</data>
  <data key="d4">0.0</data>
</node>
<node id="907">
  <data key="d0">Eggs</data>
  <data key="d1">Hamburg; Freie und Hansestadt</data>
  <data key="d2">Warehouse_EdekaNord</data>
  <data key="d3">2000</data>
  <data key="d6">0.0</data>
  <data key="d4">0.0</data>
</node>
<node id="908">
  <data key="d0">Eggs</data>
  <data key="d1">Hamburg; Freie und Hansestadt</data>
  <data key="d2">Store_EdekaNord</data>
  <data key="d3">2000</data>
  <data key="d6">3061.365423529889</data>
  <data key="d4">3061.365423529889</data>
</node>
<node id="909">
  <data key="d0">Eggs</data>
  <data key="d1">Hamburg; Freie und Hansestadt</data>
  <data key="d2">Warehouse_EdekaNordbayern</data>
  <data key="d3">2000</data>
  <data key="d6">0.0</data>
  <data key="d4">0.0</data>
</node>
<node id="910">
  <data key="d0">Eggs</data>
  <data key="d1">Hamburg; Freie und Hansestadt</data>
  <data key="d2">Store_EdekaNordbayern</data>
  <data key="d3">2000</data>
  <data key="d6">0.0</data>
  <data key="d4">0.0</data>
</node>
<node id="911">
  <data key="d0">Eggs</data>
  <data key="d1">Hamburg; Freie und Hansestadt</data>
  <data key="d2">Warehouse_EdekaRheinRuhr</data>
  <data key="d3">2000</data>
  <data key="d6">0.0</data>
  <data key="d4">0.0</data>
</node>
<node id="912">
  <data key="d0">Eggs</data>
  <data key="d1">Hamburg; Freie und Hansestadt</data>
  <data key="d2">Store_EdekaRheinRuhr</data>
  <data key="d3">2000</data>
  <data key="d6">0.0</data>
  <data key="d4">0.0</data>
</node>
<node id="913">
  <data key="d0">Eggs</data>
  <data key="d1">Hamburg; Freie und Hansestadt</data>
  <data key="d2">Warehouse_EdekaSuedbayern</data>
  <data key="d3">2000</data>
  <data key="d6">0.0</data>
  <data key="d4">0.0</data>
</node>
<node id="914">
  <data key="d0">Eggs</data>
  <data key="d1">Hamburg; Freie und Hansestadt</data>
  <data key="d2">Store_EdekaSuedbayern</data>
  <data key="d3">2000</data>
  <data key="d6">0.0</data>
  <data key="d4">0.0</data>
</node>
<node id="915">
  <data key="d0">Eggs</data>
  <data key="d1">Hamburg; Freie und Hansestadt</data>
  <data key="d2">Warehouse_EdekaSuedwest</data>
  <data key="d3">2000</data>
  <data key="d6">0.0</data>
  <data key="d4">0.0</data>
</node>
<node id="916">
  <data key="d0">Eggs</data>
  <data key="d1">Hamburg; Freie und Hansestadt</data>
  <data key="d2">Store_EdekaSuedwest</data>
  <data key="d3">2000</data>
  <data key="d6">0.0</data>
  <data key="d4">0.0</data>
</node>
<node id="917">
  <data key="d0">Eggs</data>
  <data key="d1">Hamburg; Freie und Hansestadt</data>
  <data key="d2">Warehouse_Globus</data>
  <data key="d3">2000</data>
  <data key="d6">0.0</data>
  <data key="d4">0.0</data>
</node>
<node id="918">
  <data key="d0">Eggs</data>
  <data key="d1">Hamburg; Freie und Hansestadt</data>
  <data key="d2">Store_Globus</data>
  <data key="d3">2000</data>
  <data key="d6">0.0</data>
  <data key="d4">0.0</data>
</node>
<node id="919">
  <data key="d0">Eggs</data>
  <data key="d1">Hamburg; Freie und Hansestadt</data>
  <data key="d2">Warehouse_Kaes</data>
  <data key="d3">2000</data>
  <data key="d6">0.0</data>
  <data key="d4">0.0</data>
</node>
<node id="920">
  <data key="d0">Eggs</data>
  <data key="d1">Hamburg; Freie und Hansestadt</data>
  <data key="d2">Store_Kaes</data>
  <data key="d3">2000</data>
  <data key="d6">0.0</data>
  <data key="d4">0.0</data>
</node>
<node id="921">
  <data key="d0">Eggs</data>
  <data key="d1">Hamburg; Freie und Hansestadt</data>
  <data key="d2">Warehouse_KaisersTengelmann</data>
  <data key="d3">2000</data>
  <data key="d6">0.0</data>
  <data key="d4">0.0</data>
</node>
<node id="922">
  <data key="d0">Eggs</data>
  <data key="d1">Hamburg; Freie und Hansestadt</data>
  <data key="d2">Store_KaisersTengelmann</data>
  <data key="d3">2000</data>
  <data key="d6">0.0</data>
  <data key="d4">0.0</data>
</node>
<node id="923">
  <data key="d0">Eggs</data>
  <data key="d1">Hamburg; Freie und Hansestadt</data>
  <data key="d2">Warehouse_Kaufland</data>
  <data key="d3">2000</data>
  <data key="d6">0.0</data>
  <data key="d4">0.0</data>
</node>
<node id="924">
  <data key="d0">Eggs</data>
  <data key="d1">Hamburg; Freie und Hansestadt</data>
  <data key="d2">Store_Kaufland</data>
  <data key="d3">2000</data>
  <data key="d6">1070.6384380769616</data>
  <data key="d4">1070.6384380769616</data>
</node>
<node id="925">
  <data key="d0">Eggs</data>
  <data key="d1">Hamburg; Freie und Hansestadt</data>
  <data key="d2">Warehouse_KlaasKock</data>
  <data key="d3">2000</data>
  <data key="d6">0.0</data>
  <data key="d4">0.0</data>
</node>
<node id="926">
  <data key="d0">Eggs</data>
  <data key="d1">Hamburg; Freie und Hansestadt</data>
  <data key="d2">Store_KlaasKock</data>
  <data key="d3">2000</data>
  <data key="d6">0.0</data>
  <data key="d4">0.0</data>
</node>
<node id="927">
  <data key="d0">Eggs</data>
  <data key="d1">Hamburg; Freie und Hansestadt</data>
  <data key="d2">Warehouse_Lidl</data>
  <data key="d3">2000</data>
  <data key="d6">0.0</data>
  <data key="d4">0.0</data>
</node>
<node id="928">
  <data key="d0">Eggs</data>
  <data key="d1">Hamburg; Freie und Hansestadt</data>
  <data key="d2">Store_Lidl</data>
  <data key="d3">2000</data>
  <data key="d6">1667.2583555160645</data>
  <data key="d4">1667.2583555160645</data>
</node>
<node id="929">
  <data key="d0">Eggs</data>
  <data key="d1">Hamburg; Freie und Hansestadt</data>
  <data key="d2">Warehouse_Netto</data>
  <data key="d3">2000</data>
  <data key="d6">0.0</data>
  <data key="d4">0.0</data>
</node>
<node id="930">
  <data key="d0">Eggs</data>
  <data key="d1">Hamburg; Freie und Hansestadt</data>
  <data key="d2">Store_Netto</data>
  <data key="d3">2000</data>
  <data key="d6">589.2809244366505</data>
  <data key="d4">589.2809244366505</data>
</node>
<node id="931">
  <data key="d0">Eggs</data>
  <data key="d1">Hamburg; Freie und Hansestadt</data>
  <data key="d2">Warehouse_NettoNord</data>
  <data key="d3">2000</data>
  <data key="d6">0.0</data>
  <data key="d4">0.0</data>
</node>
<node id="932">
  <data key="d0">Eggs</data>
  <data key="d1">Hamburg; Freie und Hansestadt</data>
  <data key="d2">Store_NettoNord</data>
  <data key="d3">2000</data>
  <data key="d6">17.09080562214972</data>
  <data key="d4">17.09080562214972</data>
</node>
<node id="933">
  <data key="d0">Eggs</data>
  <data key="d1">Hamburg; Freie und Hansestadt</data>
  <data key="d2">Warehouse_Norma</data>
  <data key="d3">2000</data>
  <data key="d6">0.0</data>
  <data key="d4">0.0</data>
</node>
<node id="934">
  <data key="d0">Eggs</data>
  <data key="d1">Hamburg; Freie und Hansestadt</data>
  <data key="d2">Store_Norma</data>
  <data key="d3">2000</data>
  <data key="d6">0.0</data>
  <data key="d4">0.0</data>
</node>
<node id="935">
  <data key="d0">Eggs</data>
  <data key="d1">Hamburg; Freie und Hansestadt</data>
  <data key="d2">Warehouse_Penny</data>
  <data key="d3">2000</data>
  <data key="d6">0.0</data>
  <data key="d4">0.0</data>
</node>
<node id="936">
  <data key="d0">Eggs</data>
  <data key="d1">Hamburg; Freie und Hansestadt</data>
  <data key="d2">Store_Penny</data>
  <data key="d3">2000</data>
  <data key="d6">1510.575881621239</data>
  <data key="d4">1510.575881621239</data>
</node>
<node id="937">
  <data key="d0">Eggs</data>
  <data key="d1">Hamburg; Freie und Hansestadt</data>
  <data key="d2">Warehouse_Real</data>
  <data key="d3">2000</data>
  <data key="d6">0.0</data>
  <data key="d4">0.0</data>
</node>
<node id="938">
  <data key="d0">Eggs</data>
  <data key="d1">Hamburg; Freie und Hansestadt</data>
  <data key="d2">Store_Real</data>
  <data key="d3">2000</data>
  <data key="d6">499.80553029716083</data>
  <data key="d4">499.80553029716083</data>
</node>
<node id="939">
  <data key="d0">Eggs</data>
  <data key="d1">Hamburg; Freie und Hansestadt</data>
  <data key="d2">Warehouse_ReweHit</data>
  <data key="d3">2000</data>
  <data key="d6">0.0</data>
  <data key="d4">0.0</data>
</node>
<node id="940">
  <data key="d0">Eggs</data>
  <data key="d1">Hamburg; Freie und Hansestadt</data>
  <data key="d2">Store_ReweHit</data>
  <data key="d3">2000</data>
  <data key="d6">1861.892471307134</data>
  <data key="d4">1861.892471307134</data>
</node>
<node id="941">
  <data key="d0">Eggs</data>
  <data key="d1">Hamburg; Freie und Hansestadt</data>
  <data key="d2">Warehouse_Tegut</data>
  <data key="d3">2000</data>
  <data key="d6">0.0</data>
  <data key="d4">0.0</data>
</node>
<node id="942">
  <data key="d0">Eggs</data>
  <data key="d1">Hamburg; Freie und Hansestadt</data>
  <data key="d2">Store_Tegut</data>
  <data key="d3">2000</data>
  <data key="d6">0.0</data>
  <data key="d4">0.0</data>
</node>
<node id="943">
  <data key="d0">Eggs</data>
  <data key="d1">Hamburg; Freie und Hansestadt</data>
  <data key="d2">Warehouse_Wasgau</data>
  <data key="d3">2000</data>
  <data key="d6">0.0</data>
  <data key="d4">0.0</data>
</node>
<node id="944">
  <data key="d0">Eggs</data>
  <data key="d1">Hamburg; Freie und Hansestadt</data>
  <data key="d2">Store_Wasgau</data>
  <data key="d3">2000</data>
  <data key="d6">0.0</data>
  <data key="d4">0.0</data>
</node>
<node id="945">
  <data key="d0">Eggs</data>
  <data key="d1">Braunschweig; Stadt</data>
  <data key="d2">Producer</data>
  <data key="d3">3101</data>
  <data key="d4">11.775473934683108</data>
</node>
<node id="946">
  <data key="d0">Eggs</data>
  <data key="d1">Braunschweig; Stadt</data>
  <data key="d2">Consumer</data>
  <data key="d3">3101</data>
  <data key="d5">2292.4206481899146</data>
</node>
<node id="947">
  <data key="d0">Eggs</data>
  <data key="d1">Braunschweig; Stadt</data>
  <data key="d2">Wholesale</data>
  <data key="d3">3101</data>
  <data key="d6">378.24940695133586</data>
  <data key="d4">378.24940695133586</data>
</node>
<node id="948">
  <data key="d0">Eggs</data>
  <data key="d1">Braunschweig; Stadt</data>
  <data key="d2">Warehouse_AldiNord</data>
  <data key="d3">3101</data>
  <data key="d6">0.0</data>
  <data key="d4">0.0</data>
</node>
<node id="949">
  <data key="d0">Eggs</data>
  <data key="d1">Braunschweig; Stadt</data>
  <data key="d2">Store_AldiNord</data>
  <data key="d3">3101</data>
  <data key="d6">271.50668392874246</data>
  <data key="d4">271.50668392874246</data>
</node>
<node id="950">
  <data key="d0">Eggs</data>
  <data key="d1">Braunschweig; Stadt</data>
  <data key="d2">Warehouse_AldiSued</data>
  <data key="d3">3101</data>
  <data key="d6">0.0</data>
  <data key="d4">0.0</data>
</node>
<node id="951">
  <data key="d0">Eggs</data>
  <data key="d1">Braunschweig; Stadt</data>
  <data key="d2">Store_AldiSued</data>
  <data key="d3">3101</data>
  <data key="d6">0.0</data>
  <data key="d4">0.0</data>
</node>
<node id="952">
  <data key="d0">Eggs</data>
  <data key="d1">Braunschweig; Stadt</data>
  <data key="d2">Warehouse_Alnatura</data>
  <data key="d3">3101</data>
  <data key="d6">0.0</data>
  <data key="d4">0.0</data>
</node>
<node id="953">
  <data key="d0">Eggs</data>
  <data key="d1">Braunschweig; Stadt</data>
  <data key="d2">Store_Alnatura</data>
  <data key="d3">3101</data>
  <data key="d6">0.0</data>
  <data key="d4">0.0</data>
</node>
<node id="954">
  <data key="d0">Eggs</data>
  <data key="d1">Braunschweig; Stadt</data>
  <data key="d2">Warehouse_BartelsLangness</data>
  <data key="d3">3101</data>
  <data key="d6">0.0</data>
  <data key="d4">0.0</data>
</node>
<node id="955">
  <data key="d0">Eggs</data>
  <data key="d1">Braunschweig; Stadt</data>
  <data key="d2">Store_BartelsLangness</data>
  <data key="d3">3101</data>
  <data key="d6">0.0</data>
  <data key="d4">0.0</data>
</node>
<node id="956">
  <data key="d0">Eggs</data>
  <data key="d1">Braunschweig; Stadt</data>
  <data key="d2">Warehouse_Buenting</data>
  <data key="d3">3101</data>
  <data key="d6">0.0</data>
  <data key="d4">0.0</data>
</node>
<node id="957">
  <data key="d0">Eggs</data>
  <data key="d1">Braunschweig; Stadt</data>
  <data key="d2">Store_Buenting</data>
  <data key="d3">3101</data>
  <data key="d6">0.0</data>
  <data key="d4">0.0</data>
</node>
<node id="958">
  <data key="d0">Eggs</data>
  <data key="d1">Braunschweig; Stadt</data>
  <data key="d2">Warehouse_Coop</data>
  <data key="d3">3101</data>
  <data key="d6">0.0</data>
  <data key="d4">0.0</data>
</node>
<node id="959">
  <data key="d0">Eggs</data>
  <data key="d1">Braunschweig; Stadt</data>
  <data key="d2">Store_Coop</data>
  <data key="d3">3101</data>
  <data key="d6">0.0</data>
  <data key="d4">0.0</data>
</node>
<node id="960">
  <data key="d0">Eggs</data>
  <data key="d1">Braunschweig; Stadt</data>
  <data key="d2">Warehouse_Dennree</data>
  <data key="d3">3101</data>
  <data key="d6">0.0</data>
  <data key="d4">0.0</data>
</node>
<node id="961">
  <data key="d0">Eggs</data>
  <data key="d1">Braunschweig; Stadt</data>
  <data key="d2">Store_Dennree</data>
  <data key="d3">3101</data>
  <data key="d6">21.728364755652787</data>
  <data key="d4">21.728364755652787</data>
</node>
<node id="962">
  <data key="d0">Eggs</data>
  <data key="d1">Braunschweig; Stadt</data>
  <data key="d2">Warehouse_EdekaHessenring</data>
  <data key="d3">3101</data>
  <data key="d6">0.0</data>
  <data key="d4">0.0</data>
</node>
<node id="963">
  <data key="d0">Eggs</data>
  <data key="d1">Braunschweig; Stadt</data>
  <data key="d2">Store_EdekaHessenring</data>
  <data key="d3">3101</data>
  <data key="d6">0.0</data>
  <data key="d4">0.0</data>
</node>
<node id="964">
  <data key="d0">Eggs</data>
  <data key="d1">Braunschweig; Stadt</data>
  <data key="d2">Warehouse_EdekaMindenHannover</data>
  <data key="d3">3101</data>
  <data key="d6">0.0</data>
  <data key="d4">0.0</data>
</node>
<node id="965">
  <data key="d0">Eggs</data>
  <data key="d1">Braunschweig; Stadt</data>
  <data key="d2">Store_EdekaMindenHannover</data>
  <data key="d3">3101</data>
  <data key="d6">350.39435056413055</data>
  <data key="d4">350.39435056413055</data>
</node>
<node id="966">
  <data key="d0">Eggs</data>
  <data key="d1">Braunschweig; Stadt</data>
  <data key="d2">Warehouse_EdekaNord</data>
  <data key="d3">3101</data>
  <data key="d6">0.0</data>
  <data key="d4">0.0</data>
</node>
<node id="967">
  <data key="d0">Eggs</data>
  <data key="d1">Braunschweig; Stadt</data>
  <data key="d2">Store_EdekaNord</data>
  <data key="d3">3101</data>
  <data key="d6">0.0</data>
  <data key="d4">0.0</data>
</node>
<node id="968">
  <data key="d0">Eggs</data>
  <data key="d1">Braunschweig; Stadt</data>
  <data key="d2">Warehouse_EdekaNordbayern</data>
  <data key="d3">3101</data>
  <data key="d6">0.0</data>
  <data key="d4">0.0</data>
</node>
<node id="969">
  <data key="d0">Eggs</data>
  <data key="d1">Braunschweig; Stadt</data>
  <data key="d2">Store_EdekaNordbayern</data>
  <data key="d3">3101</data>
  <data key="d6">0.0</data>
  <data key="d4">0.0</data>
</node>
<node id="970">
  <data key="d0">Eggs</data>
  <data key="d1">Braunschweig; Stadt</data>
  <data key="d2">Warehouse_EdekaRheinRuhr</data>
  <data key="d3">3101</data>
  <data key="d6">0.0</data>
  <data key="d4">0.0</data>
</node>
<node id="971">
  <data key="d0">Eggs</data>
  <data key="d1">Braunschweig; Stadt</data>
  <data key="d2">Store_EdekaRheinRuhr</data>
  <data key="d3">3101</data>
  <data key="d6">0.0</data>
  <data key="d4">0.0</data>
</node>
<node id="972">
  <data key="d0">Eggs</data>
  <data key="d1">Braunschweig; Stadt</data>
  <data key="d2">Warehouse_EdekaSuedbayern</data>
  <data key="d3">3101</data>
  <data key="d6">0.0</data>
  <data key="d4">0.0</data>
</node>
<node id="973">
  <data key="d0">Eggs</data>
  <data key="d1">Braunschweig; Stadt</data>
  <data key="d2">Store_EdekaSuedbayern</data>
  <data key="d3">3101</data>
  <data key="d6">0.0</data>
  <data key="d4">0.0</data>
</node>
<node id="974">
  <data key="d0">Eggs</data>
  <data key="d1">Braunschweig; Stadt</data>
  <data key="d2">Warehouse_EdekaSuedwest</data>
  <data key="d3">3101</data>
  <data key="d6">0.0</data>
  <data key="d4">0.0</data>
</node>
<node id="975">
  <data key="d0">Eggs</data>
  <data key="d1">Braunschweig; Stadt</data>
  <data key="d2">Store_EdekaSuedwest</data>
  <data key="d3">3101</data>
  <data key="d6">0.0</data>
  <data key="d4">0.0</data>
</node>
<node id="976">
  <data key="d0">Eggs</data>
  <data key="d1">Braunschweig; Stadt</data>
  <data key="d2">Warehouse_Globus</data>
  <data key="d3">3101</data>
  <data key="d6">0.0</data>
  <data key="d4">0.0</data>
</node>
<node id="977">
  <data key="d0">Eggs</data>
  <data key="d1">Braunschweig; Stadt</data>
  <data key="d2">Store_Globus</data>
  <data key="d3">3101</data>
  <data key="d6">0.0</data>
  <data key="d4">0.0</data>
</node>
<node id="978">
  <data key="d0">Eggs</data>
  <data key="d1">Braunschweig; Stadt</data>
  <data key="d2">Warehouse_Kaes</data>
  <data key="d3">3101</data>
  <data key="d6">0.0</data>
  <data key="d4">0.0</data>
</node>
<node id="979">
  <data key="d0">Eggs</data>
  <data key="d1">Braunschweig; Stadt</data>
  <data key="d2">Store_Kaes</data>
  <data key="d3">3101</data>
  <data key="d6">0.0</data>
  <data key="d4">0.0</data>
</node>
<node id="980">
  <data key="d0">Eggs</data>
  <data key="d1">Braunschweig; Stadt</data>
  <data key="d2">Warehouse_KaisersTengelmann</data>
  <data key="d3">3101</data>
  <data key="d6">0.0</data>
  <data key="d4">0.0</data>
</node>
<node id="981">
  <data key="d0">Eggs</data>
  <data key="d1">Braunschweig; Stadt</data>
  <data key="d2">Store_KaisersTengelmann</data>
  <data key="d3">3101</data>
  <data key="d6">0.0</data>
  <data key="d4">0.0</data>
</node>
<node id="982">
  <data key="d0">Eggs</data>
  <data key="d1">Braunschweig; Stadt</data>
  <data key="d2">Warehouse_Kaufland</data>
  <data key="d3">3101</data>
  <data key="d6">0.0</data>
  <data key="d4">0.0</data>
</node>
<node id="983">
  <data key="d0">Eggs</data>
  <data key="d1">Braunschweig; Stadt</data>
  <data key="d2">Store_Kaufland</data>
  <data key="d3">3101</data>
  <data key="d6">154.09521383468356</data>
  <data key="d4">154.09521383468356</data>
</node>
<node id="984">
  <data key="d0">Eggs</data>
  <data key="d1">Braunschweig; Stadt</data>
  <data key="d2">Warehouse_KlaasKock</data>
  <data key="d3">3101</data>
  <data key="d6">0.0</data>
  <data key="d4">0.0</data>
</node>
<node id="985">
  <data key="d0">Eggs</data>
  <data key="d1">Braunschweig; Stadt</data>
  <data key="d2">Store_KlaasKock</data>
  <data key="d3">3101</data>
  <data key="d6">0.0</data>
  <data key="d4">0.0</data>
</node>
<node id="986">
  <data key="d0">Eggs</data>
  <data key="d1">Braunschweig; Stadt</data>
  <data key="d2">Warehouse_Lidl</data>
  <data key="d3">3101</data>
  <data key="d6">0.0</data>
  <data key="d4">0.0</data>
</node>
<node id="987">
  <data key="d0">Eggs</data>
  <data key="d1">Braunschweig; Stadt</data>
  <data key="d2">Store_Lidl</data>
  <data key="d3">3101</data>
  <data key="d6">151.5113001880654</data>
  <data key="d4">151.5113001880654</data>
</node>
<node id="988">
  <data key="d0">Eggs</data>
  <data key="d1">Braunschweig; Stadt</data>
  <data key="d2">Warehouse_Netto</data>
  <data key="d3">3101</data>
  <data key="d6">0.0</data>
  <data key="d4">0.0</data>
</node>
<node id="989">
  <data key="d0">Eggs</data>
  <data key="d1">Braunschweig; Stadt</data>
  <data key="d2">Store_Netto</data>
  <data key="d3">3101</data>
  <data key="d6">176.52828231214133</data>
  <data key="d4">176.52828231214133</data>
</node>
<node id="990">
  <data key="d0">Eggs</data>
  <data key="d1">Braunschweig; Stadt</data>
  <data key="d2">Warehouse_NettoNord</data>
  <data key="d3">3101</data>
  <data key="d6">0.0</data>
  <data key="d4">0.0</data>
</node>
<node id="991">
  <data key="d0">Eggs</data>
  <data key="d1">Braunschweig; Stadt</data>
  <data key="d2">Store_NettoNord</data>
  <data key="d3">3101</data>
  <data key="d6">0.0</data>
  <data key="d4">0.0</data>
</node>
<node id="992">
  <data key="d0">Eggs</data>
  <data key="d1">Braunschweig; Stadt</data>
  <data key="d2">Warehouse_Norma</data>
  <data key="d3">3101</data>
  <data key="d6">0.0</data>
  <data key="d4">0.0</data>
</node>
<node id="993">
  <data key="d0">Eggs</data>
  <data key="d1">Braunschweig; Stadt</data>
  <data key="d2">Store_Norma</data>
  <data key="d3">3101</data>
  <data key="d6">0.0</data>
  <data key="d4">0.0</data>
</node>
<node id="994">
  <data key="d0">Eggs</data>
  <data key="d1">Braunschweig; Stadt</data>
  <data key="d2">Warehouse_Penny</data>
  <data key="d3">3101</data>
  <data key="d6">0.0</data>
  <data key="d4">0.0</data>
</node>
<node id="995">
  <data key="d0">Eggs</data>
  <data key="d1">Braunschweig; Stadt</data>
  <data key="d2">Store_Penny</data>
  <data key="d3">3101</data>
  <data key="d6">156.87487851513643</data>
  <data key="d4">156.87487851513643</data>
</node>
<node id="996">
  <data key="d0">Eggs</data>
  <data key="d1">Braunschweig; Stadt</data>
  <data key="d2">Warehouse_Real</data>
  <data key="d3">3101</data>
  <data key="d6">0.0</data>
  <data key="d4">0.0</data>
</node>
<node id="997">
  <data key="d0">Eggs</data>
  <data key="d1">Braunschweig; Stadt</data>
  <data key="d2">Store_Real</data>
  <data key="d3">3101</data>
  <data key="d6">389.270505883704</data>
  <data key="d4">389.270505883704</data>
</node>
<node id="998">
  <data key="d0">Eggs</data>
  <data key="d1">Braunschweig; Stadt</data>
  <data key="d2">Warehouse_ReweHit</data>
  <data key="d3">3101</data>
  <data key="d6">0.0</data>
  <data key="d4">0.0</data>
</node>
<node id="999">
  <data key="d0">Eggs</data>
  <data key="d1">Braunschweig; Stadt</data>
  <data key="d2">Store_ReweHit</data>
  <data key="d3">3101</data>
  <data key="d6">204.20747849636928</data>
  <data key="d4">204.20747849636928</data>
</node>
<node id="1000">
  <data key="d0">Eggs</data>
  <data key="d1">Braunschweig; Stadt</data>
  <data key="d2">Warehouse_Tegut</data>
  <data key="d3">3101</data>
  <data key="d6">0.0</data>
  <data key="d4">0.0</data>
</node>
<node id="1001">
  <data key="d0">Eggs</data>
  <data key="d1">Braunschweig; Stadt</data>
  <data key="d2">Store_Tegut</data>
  <data key="d3">3101</data>
  <data key="d6">0.0</data>
  <data key="d4">0.0</data>
</node>
<node id="1002">
  <data key="d0">Eggs</data>
  <data key="d1">Braunschweig; Stadt</data>
  <data key="d2">Warehouse_Wasgau</data>
  <data key="d3">3101</data>
  <data key="d6">0.0</data>
  <data key="d4">0.0</data>
</node>
<node id="1003">
  <data key="d0">Eggs</data>
  <data key="d1">Braunschweig; Stadt</data>
  <data key="d2">Store_Wasgau</data>
  <data key="d3">3101</data>
  <data key="d6">0.0</data>
  <data key="d4">0.0</data>
</node>
<node id="1004">
  <data key="d0">Eggs</data>
  <data key="d1">Salzgitter; Stadt</data>
  <data key="d2">Producer</data>
  <data key="d3">3102</data>
  <data key="d4">7.687311057027344</data>
</node>
<node id="1005">
  <data key="d0">Eggs</data>
  <data key="d1">Salzgitter; Stadt</data>
  <data key="d2">Consumer</data>
  <data key="d3">3102</data>
  <data key="d5">914.8772711095678</data>
</node>
<node id="1006">
  <data key="d0">Eggs</data>
  <data key="d1">Salzgitter; Stadt</data>
  <data key="d2">Wholesale</data>
  <data key="d3">3102</data>
  <data key="d6">150.95474973307873</data>
  <data key="d4">150.95474973307873</data>
</node>
<node id="1007">
  <data key="d0">Eggs</data>
  <data key="d1">Salzgitter; Stadt</data>
  <data key="d2">Warehouse_AldiNord</data>
  <data key="d3">3102</data>
  <data key="d6">1235.9972249430489</data>
  <data key="d4">1235.9972249430489</data>
</node>
<node id="1008">
  <data key="d0">Eggs</data>
  <data key="d1">Salzgitter; Stadt</data>
  <data key="d2">Store_AldiNord</data>
  <data key="d3">3102</data>
  <data key="d6">112.39021559865309</data>
  <data key="d4">112.39021559865309</data>
</node>
<node id="1009">
  <data key="d0">Eggs</data>
  <data key="d1">Salzgitter; Stadt</data>
  <data key="d2">Warehouse_AldiSued</data>
  <data key="d3">3102</data>
  <data key="d6">0.0</data>
  <data key="d4">0.0</data>
</node>
<node id="1010">
  <data key="d0">Eggs</data>
  <data key="d1">Salzgitter; Stadt</data>
  <data key="d2">Store_AldiSued</data>
  <data key="d3">3102</data>
  <data key="d6">0.0</data>
  <data key="d4">0.0</data>
</node>
<node id="1011">
  <data key="d0">Eggs</data>
  <data key="d1">Salzgitter; Stadt</data>
  <data key="d2">Warehouse_Alnatura</data>
  <data key="d3">3102</data>
  <data key="d6">0.0</data>
  <data key="d4">0.0</data>
</node>
<node id="1012">
  <data key="d0">Eggs</data>
  <data key="d1">Salzgitter; Stadt</data>
  <data key="d2">Store_Alnatura</data>
  <data key="d3">3102</data>
  <data key="d6">0.0</data>
  <data key="d4">0.0</data>
</node>
<node id="1013">
  <data key="d0">Eggs</data>
  <data key="d1">Salzgitter; Stadt</data>
  <data key="d2">Warehouse_BartelsLangness</data>
  <data key="d3">3102</data>
  <data key="d6">0.0</data>
  <data key="d4">0.0</data>
</node>
<node id="1014">
  <data key="d0">Eggs</data>
  <data key="d1">Salzgitter; Stadt</data>
  <data key="d2">Store_BartelsLangness</data>
  <data key="d3">3102</data>
  <data key="d6">0.0</data>
  <data key="d4">0.0</data>
</node>
<node id="1015">
  <data key="d0">Eggs</data>
  <data key="d1">Salzgitter; Stadt</data>
  <data key="d2">Warehouse_Buenting</data>
  <data key="d3">3102</data>
  <data key="d6">0.0</data>
  <data key="d4">0.0</data>
</node>
<node id="1016">
  <data key="d0">Eggs</data>
  <data key="d1">Salzgitter; Stadt</data>
  <data key="d2">Store_Buenting</data>
  <data key="d3">3102</data>
  <data key="d6">0.0</data>
  <data key="d4">0.0</data>
</node>
<node id="1017">
  <data key="d0">Eggs</data>
  <data key="d1">Salzgitter; Stadt</data>
  <data key="d2">Warehouse_Coop</data>
  <data key="d3">3102</data>
  <data key="d6">0.0</data>
  <data key="d4">0.0</data>
</node>
<node id="1018">
  <data key="d0">Eggs</data>
  <data key="d1">Salzgitter; Stadt</data>
  <data key="d2">Store_Coop</data>
  <data key="d3">3102</data>
  <data key="d6">0.0</data>
  <data key="d4">0.0</data>
</node>
<node id="1019">
  <data key="d0">Eggs</data>
  <data key="d1">Salzgitter; Stadt</data>
  <data key="d2">Warehouse_Dennree</data>
  <data key="d3">3102</data>
  <data key="d6">0.0</data>
  <data key="d4">0.0</data>
</node>
<node id="1020">
  <data key="d0">Eggs</data>
  <data key="d1">Salzgitter; Stadt</data>
  <data key="d2">Store_Dennree</data>
  <data key="d3">3102</data>
  <data key="d6">0.0</data>
  <data key="d4">0.0</data>
</node>
<node id="1021">
  <data key="d0">Eggs</data>
  <data key="d1">Salzgitter; Stadt</data>
  <data key="d2">Warehouse_EdekaHessenring</data>
  <data key="d3">3102</data>
  <data key="d6">0.0</data>
  <data key="d4">0.0</data>
</node>
<node id="1022">
  <data key="d0">Eggs</data>
  <data key="d1">Salzgitter; Stadt</data>
  <data key="d2">Store_EdekaHessenring</data>
  <data key="d3">3102</data>
  <data key="d6">0.0</data>
  <data key="d4">0.0</data>
</node>
<node id="1023">
  <data key="d0">Eggs</data>
  <data key="d1">Salzgitter; Stadt</data>
  <data key="d2">Warehouse_EdekaMindenHannover</data>
  <data key="d3">3102</data>
  <data key="d6">0.0</data>
  <data key="d4">0.0</data>
</node>
<node id="1024">
  <data key="d0">Eggs</data>
  <data key="d1">Salzgitter; Stadt</data>
  <data key="d2">Store_EdekaMindenHannover</data>
  <data key="d3">3102</data>
  <data key="d6">134.340344232259</data>
  <data key="d4">134.340344232259</data>
</node>
<node id="1025">
  <data key="d0">Eggs</data>
  <data key="d1">Salzgitter; Stadt</data>
  <data key="d2">Warehouse_EdekaNord</data>
  <data key="d3">3102</data>
  <data key="d6">0.0</data>
  <data key="d4">0.0</data>
</node>
<node id="1026">
  <data key="d0">Eggs</data>
  <data key="d1">Salzgitter; Stadt</data>
  <data key="d2">Store_EdekaNord</data>
  <data key="d3">3102</data>
  <data key="d6">0.0</data>
  <data key="d4">0.0</data>
</node>
<node id="1027">
  <data key="d0">Eggs</data>
  <data key="d1">Salzgitter; Stadt</data>
  <data key="d2">Warehouse_EdekaNordbayern</data>
  <data key="d3">3102</data>
  <data key="d6">0.0</data>
  <data key="d4">0.0</data>
</node>
<node id="1028">
  <data key="d0">Eggs</data>
  <data key="d1">Salzgitter; Stadt</data>
  <data key="d2">Store_EdekaNordbayern</data>
  <data key="d3">3102</data>
  <data key="d6">0.0</data>
  <data key="d4">0.0</data>
</node>
<node id="1029">
  <data key="d0">Eggs</data>
  <data key="d1">Salzgitter; Stadt</data>
  <data key="d2">Warehouse_EdekaRheinRuhr</data>
  <data key="d3">3102</data>
  <data key="d6">0.0</data>
  <data key="d4">0.0</data>
</node>
<node id="1030">
  <data key="d0">Eggs</data>
  <data key="d1">Salzgitter; Stadt</data>
  <data key="d2">Store_EdekaRheinRuhr</data>
  <data key="d3">3102</data>
  <data key="d6">0.0</data>
  <data key="d4">0.0</data>
</node>
<node id="1031">
  <data key="d0">Eggs</data>
  <data key="d1">Salzgitter; Stadt</data>
  <data key="d2">Warehouse_EdekaSuedbayern</data>
  <data key="d3">3102</data>
  <data key="d6">0.0</data>
  <data key="d4">0.0</data>
</node>
<node id="1032">
  <data key="d0">Eggs</data>
  <data key="d1">Salzgitter; Stadt</data>
  <data key="d2">Store_EdekaSuedbayern</data>
  <data key="d3">3102</data>
  <data key="d6">0.0</data>
  <data key="d4">0.0</data>
</node>
<node id="1033">
  <data key="d0">Eggs</data>
  <data key="d1">Salzgitter; Stadt</data>
  <data key="d2">Warehouse_EdekaSuedwest</data>
  <data key="d3">3102</data>
  <data key="d6">0.0</data>
  <data key="d4">0.0</data>
</node>
<node id="1034">
  <data key="d0">Eggs</data>
  <data key="d1">Salzgitter; Stadt</data>
  <data key="d2">Store_EdekaSuedwest</data>
  <data key="d3">3102</data>
  <data key="d6">0.0</data>
  <data key="d4">0.0</data>
</node>
<node id="1035">
  <data key="d0">Eggs</data>
  <data key="d1">Salzgitter; Stadt</data>
  <data key="d2">Warehouse_Globus</data>
  <data key="d3">3102</data>
  <data key="d6">0.0</data>
  <data key="d4">0.0</data>
</node>
<node id="1036">
  <data key="d0">Eggs</data>
  <data key="d1">Salzgitter; Stadt</data>
  <data key="d2">Store_Globus</data>
  <data key="d3">3102</data>
  <data key="d6">0.0</data>
  <data key="d4">0.0</data>
</node>
<node id="1037">
  <data key="d0">Eggs</data>
  <data key="d1">Salzgitter; Stadt</data>
  <data key="d2">Warehouse_Kaes</data>
  <data key="d3">3102</data>
  <data key="d6">0.0</data>
  <data key="d4">0.0</data>
</node>
<node id="1038">
  <data key="d0">Eggs</data>
  <data key="d1">Salzgitter; Stadt</data>
  <data key="d2">Store_Kaes</data>
  <data key="d3">3102</data>
  <data key="d6">0.0</data>
  <data key="d4">0.0</data>
</node>
<node id="1039">
  <data key="d0">Eggs</data>
  <data key="d1">Salzgitter; Stadt</data>
  <data key="d2">Warehouse_KaisersTengelmann</data>
  <data key="d3">3102</data>
  <data key="d6">0.0</data>
  <data key="d4">0.0</data>
</node>
<node id="1040">
  <data key="d0">Eggs</data>
  <data key="d1">Salzgitter; Stadt</data>
  <data key="d2">Store_KaisersTengelmann</data>
  <data key="d3">3102</data>
  <data key="d6">0.0</data>
  <data key="d4">0.0</data>
</node>
<node id="1041">
  <data key="d0">Eggs</data>
  <data key="d1">Salzgitter; Stadt</data>
  <data key="d2">Warehouse_Kaufland</data>
  <data key="d3">3102</data>
  <data key="d6">0.0</data>
  <data key="d4">0.0</data>
</node>
<node id="1042">
  <data key="d0">Eggs</data>
  <data key="d1">Salzgitter; Stadt</data>
  <data key="d2">Store_Kaufland</data>
  <data key="d3">3102</data>
  <data key="d6">48.241659291263645</data>
  <data key="d4">48.241659291263645</data>
</node>
<node id="1043">
  <data key="d0">Eggs</data>
  <data key="d1">Salzgitter; Stadt</data>
  <data key="d2">Warehouse_KlaasKock</data>
  <data key="d3">3102</data>
  <data key="d6">0.0</data>
  <data key="d4">0.0</data>
</node>
<node id="1044">
  <data key="d0">Eggs</data>
  <data key="d1">Salzgitter; Stadt</data>
  <data key="d2">Store_KlaasKock</data>
  <data key="d3">3102</data>
  <data key="d6">0.0</data>
  <data key="d4">0.0</data>
</node>
<node id="1045">
  <data key="d0">Eggs</data>
  <data key="d1">Salzgitter; Stadt</data>
  <data key="d2">Warehouse_Lidl</data>
  <data key="d3">3102</data>
  <data key="d6">0.0</data>
  <data key="d4">0.0</data>
</node>
<node id="1046">
  <data key="d0">Eggs</data>
  <data key="d1">Salzgitter; Stadt</data>
  <data key="d2">Store_Lidl</data>
  <data key="d3">3102</data>
  <data key="d6">76.7907190014283</data>
  <data key="d4">76.7907190014283</data>
</node>
<node id="1047">
  <data key="d0">Eggs</data>
  <data key="d1">Salzgitter; Stadt</data>
  <data key="d2">Warehouse_Netto</data>
  <data key="d3">3102</data>
  <data key="d6">0.0</data>
  <data key="d4">0.0</data>
</node>
<node id="1048">
  <data key="d0">Eggs</data>
  <data key="d1">Salzgitter; Stadt</data>
  <data key="d2">Store_Netto</data>
  <data key="d3">3102</data>
  <data key="d6">62.62038279492322</data>
  <data key="d4">62.62038279492322</data>
</node>
<node id="1049">
  <data key="d0">Eggs</data>
  <data key="d1">Salzgitter; Stadt</data>
  <data key="d2">Warehouse_NettoNord</data>
  <data key="d3">3102</data>
  <data key="d6">0.0</data>
  <data key="d4">0.0</data>
</node>
<node id="1050">
  <data key="d0">Eggs</data>
  <data key="d1">Salzgitter; Stadt</data>
  <data key="d2">Store_NettoNord</data>
  <data key="d3">3102</data>
  <data key="d6">0.0</data>
  <data key="d4">0.0</data>
</node>
<node id="1051">
  <data key="d0">Eggs</data>
  <data key="d1">Salzgitter; Stadt</data>
  <data key="d2">Warehouse_Norma</data>
  <data key="d3">3102</data>
  <data key="d6">0.0</data>
  <data key="d4">0.0</data>
</node>
<node id="1052">
  <data key="d0">Eggs</data>
  <data key="d1">Salzgitter; Stadt</data>
  <data key="d2">Store_Norma</data>
  <data key="d3">3102</data>
  <data key="d6">0.0</data>
  <data key="d4">0.0</data>
</node>
<node id="1053">
  <data key="d0">Eggs</data>
  <data key="d1">Salzgitter; Stadt</data>
  <data key="d2">Warehouse_Penny</data>
  <data key="d3">3102</data>
  <data key="d6">0.0</data>
  <data key="d4">0.0</data>
</node>
<node id="1054">
  <data key="d0">Eggs</data>
  <data key="d1">Salzgitter; Stadt</data>
  <data key="d2">Store_Penny</data>
  <data key="d3">3102</data>
  <data key="d6">81.16685224167253</data>
  <data key="d4">81.16685224167253</data>
</node>
<node id="1055">
  <data key="d0">Eggs</data>
  <data key="d1">Salzgitter; Stadt</data>
  <data key="d2">Warehouse_Real</data>
  <data key="d3">3102</data>
  <data key="d6">0.0</data>
  <data key="d4">0.0</data>
</node>
<node id="1056">
  <data key="d0">Eggs</data>
  <data key="d1">Salzgitter; Stadt</data>
  <data key="d2">Store_Real</data>
  <data key="d3">3102</data>
  <data key="d6">155.73477340678633</data>
  <data key="d4">155.73477340678633</data>
</node>
<node id="1057">
  <data key="d0">Eggs</data>
  <data key="d1">Salzgitter; Stadt</data>
  <data key="d2">Warehouse_ReweHit</data>
  <data key="d3">3102</data>
  <data key="d6">0.0</data>
  <data key="d4">0.0</data>
</node>
<node id="1058">
  <data key="d0">Eggs</data>
  <data key="d1">Salzgitter; Stadt</data>
  <data key="d2">Store_ReweHit</data>
  <data key="d3">3102</data>
  <data key="d6">77.45061210908418</data>
  <data key="d4">77.45061210908418</data>
</node>
<node id="1059">
  <data key="d0">Eggs</data>
  <data key="d1">Salzgitter; Stadt</data>
  <data key="d2">Warehouse_Tegut</data>
  <data key="d3">3102</data>
  <data key="d6">0.0</data>
  <data key="d4">0.0</data>
</node>
<node id="1060">
  <data key="d0">Eggs</data>
  <data key="d1">Salzgitter; Stadt</data>
  <data key="d2">Store_Tegut</data>
  <data key="d3">3102</data>
  <data key="d6">0.0</data>
  <data key="d4">0.0</data>
</node>
<node id="1061">
  <data key="d0">Eggs</data>
  <data key="d1">Salzgitter; Stadt</data>
  <data key="d2">Warehouse_Wasgau</data>
  <data key="d3">3102</data>
  <data key="d6">0.0</data>
  <data key="d4">0.0</data>
</node>
<node id="1062">
  <data key="d0">Eggs</data>
  <data key="d1">Salzgitter; Stadt</data>
  <data key="d2">Store_Wasgau</data>
  <data key="d3">3102</data>
  <data key="d6">0.0</data>
  <data key="d4">0.0</data>
</node>
<node id="1063">
  <data key="d0">Eggs</data>
  <data key="d1">Wolfsburg; Stadt</data>
  <data key="d2">Producer</data>
  <data key="d3">3103</data>
  <data key="d4">23.687871984885785</data>
</node>
<node id="1064">
  <data key="d0">Eggs</data>
  <data key="d1">Wolfsburg; Stadt</data>
  <data key="d2">Consumer</data>
  <data key="d3">3103</data>
  <data key="d5">1135.5688544345664</data>
</node>
<node id="1065">
  <data key="d0">Eggs</data>
  <data key="d1">Wolfsburg; Stadt</data>
  <data key="d2">Wholesale</data>
  <data key="d3">3103</data>
  <data key="d6">187.36886098170348</data>
  <data key="d4">187.36886098170348</data>
</node>
<node id="1066">
  <data key="d0">Eggs</data>
  <data key="d1">Wolfsburg; Stadt</data>
  <data key="d2">Warehouse_AldiNord</data>
  <data key="d3">3103</data>
  <data key="d6">0.0</data>
  <data key="d4">0.0</data>
</node>
<node id="1067">
  <data key="d0">Eggs</data>
  <data key="d1">Wolfsburg; Stadt</data>
  <data key="d2">Store_AldiNord</data>
  <data key="d3">3103</data>
  <data key="d6">141.61808684913737</data>
  <data key="d4">141.61808684913737</data>
</node>
<node id="1068">
  <data key="d0">Eggs</data>
  <data key="d1">Wolfsburg; Stadt</data>
  <data key="d2">Warehouse_AldiSued</data>
  <data key="d3">3103</data>
  <data key="d6">0.0</data>
  <data key="d4">0.0</data>
</node>
<node id="1069">
  <data key="d0">Eggs</data>
  <data key="d1">Wolfsburg; Stadt</data>
  <data key="d2">Store_AldiSued</data>
  <data key="d3">3103</data>
  <data key="d6">0.0</data>
  <data key="d4">0.0</data>
</node>
<node id="1070">
  <data key="d0">Eggs</data>
  <data key="d1">Wolfsburg; Stadt</data>
  <data key="d2">Warehouse_Alnatura</data>
  <data key="d3">3103</data>
  <data key="d6">0.0</data>
  <data key="d4">0.0</data>
</node>
<node id="1071">
  <data key="d0">Eggs</data>
  <data key="d1">Wolfsburg; Stadt</data>
  <data key="d2">Store_Alnatura</data>
  <data key="d3">3103</data>
  <data key="d6">0.0</data>
  <data key="d4">0.0</data>
</node>
<node id="1072">
  <data key="d0">Eggs</data>
  <data key="d1">Wolfsburg; Stadt</data>
  <data key="d2">Warehouse_BartelsLangness</data>
  <data key="d3">3103</data>
  <data key="d6">0.0</data>
  <data key="d4">0.0</data>
</node>
<node id="1073">
  <data key="d0">Eggs</data>
  <data key="d1">Wolfsburg; Stadt</data>
  <data key="d2">Store_BartelsLangness</data>
  <data key="d3">3103</data>
  <data key="d6">0.0</data>
  <data key="d4">0.0</data>
</node>
<node id="1074">
  <data key="d0">Eggs</data>
  <data key="d1">Wolfsburg; Stadt</data>
  <data key="d2">Warehouse_Buenting</data>
  <data key="d3">3103</data>
  <data key="d6">0.0</data>
  <data key="d4">0.0</data>
</node>
<node id="1075">
  <data key="d0">Eggs</data>
  <data key="d1">Wolfsburg; Stadt</data>
  <data key="d2">Store_Buenting</data>
  <data key="d3">3103</data>
  <data key="d6">0.0</data>
  <data key="d4">0.0</data>
</node>
<node id="1076">
  <data key="d0">Eggs</data>
  <data key="d1">Wolfsburg; Stadt</data>
  <data key="d2">Warehouse_Coop</data>
  <data key="d3">3103</data>
  <data key="d6">0.0</data>
  <data key="d4">0.0</data>
</node>
<node id="1077">
  <data key="d0">Eggs</data>
  <data key="d1">Wolfsburg; Stadt</data>
  <data key="d2">Store_Coop</data>
  <data key="d3">3103</data>
  <data key="d6">0.0</data>
  <data key="d4">0.0</data>
</node>
<node id="1078">
  <data key="d0">Eggs</data>
  <data key="d1">Wolfsburg; Stadt</data>
  <data key="d2">Warehouse_Dennree</data>
  <data key="d3">3103</data>
  <data key="d6">0.0</data>
  <data key="d4">0.0</data>
</node>
<node id="1079">
  <data key="d0">Eggs</data>
  <data key="d1">Wolfsburg; Stadt</data>
  <data key="d2">Store_Dennree</data>
  <data key="d3">3103</data>
  <data key="d6">0.0</data>
  <data key="d4">0.0</data>
</node>
<node id="1080">
  <data key="d0">Eggs</data>
  <data key="d1">Wolfsburg; Stadt</data>
  <data key="d2">Warehouse_EdekaHessenring</data>
  <data key="d3">3103</data>
  <data key="d6">0.0</data>
  <data key="d4">0.0</data>
</node>
<node id="1081">
  <data key="d0">Eggs</data>
  <data key="d1">Wolfsburg; Stadt</data>
  <data key="d2">Store_EdekaHessenring</data>
  <data key="d3">3103</data>
  <data key="d6">0.0</data>
  <data key="d4">0.0</data>
</node>
<node id="1082">
  <data key="d0">Eggs</data>
  <data key="d1">Wolfsburg; Stadt</data>
  <data key="d2">Warehouse_EdekaMindenHannover</data>
  <data key="d3">3103</data>
  <data key="d6">0.0</data>
  <data key="d4">0.0</data>
</node>
<node id="1083">
  <data key="d0">Eggs</data>
  <data key="d1">Wolfsburg; Stadt</data>
  <data key="d2">Store_EdekaMindenHannover</data>
  <data key="d3">3103</data>
  <data key="d6">169.3222739904971</data>
  <data key="d4">169.3222739904971</data>
</node>
<node id="1084">
  <data key="d0">Eggs</data>
  <data key="d1">Wolfsburg; Stadt</data>
  <data key="d2">Warehouse_EdekaNord</data>
  <data key="d3">3103</data>
  <data key="d6">0.0</data>
  <data key="d4">0.0</data>
</node>
<node id="1085">
  <data key="d0">Eggs</data>
  <data key="d1">Wolfsburg; Stadt</data>
  <data key="d2">Store_EdekaNord</data>
  <data key="d3">3103</data>
  <data key="d6">0.0</data>
  <data key="d4">0.0</data>
</node>
<node id="1086">
  <data key="d0">Eggs</data>
  <data key="d1">Wolfsburg; Stadt</data>
  <data key="d2">Warehouse_EdekaNordbayern</data>
  <data key="d3">3103</data>
  <data key="d6">0.0</data>
  <data key="d4">0.0</data>
</node>
<node id="1087">
  <data key="d0">Eggs</data>
  <data key="d1">Wolfsburg; Stadt</data>
  <data key="d2">Store_EdekaNordbayern</data>
  <data key="d3">3103</data>
  <data key="d6">0.0</data>
  <data key="d4">0.0</data>
</node>
<node id="1088">
  <data key="d0">Eggs</data>
  <data key="d1">Wolfsburg; Stadt</data>
  <data key="d2">Warehouse_EdekaRheinRuhr</data>
  <data key="d3">3103</data>
  <data key="d6">0.0</data>
  <data key="d4">0.0</data>
</node>
<node id="1089">
  <data key="d0">Eggs</data>
  <data key="d1">Wolfsburg; Stadt</data>
  <data key="d2">Store_EdekaRheinRuhr</data>
  <data key="d3">3103</data>
  <data key="d6">0.0</data>
  <data key="d4">0.0</data>
</node>
<node id="1090">
  <data key="d0">Eggs</data>
  <data key="d1">Wolfsburg; Stadt</data>
  <data key="d2">Warehouse_EdekaSuedbayern</data>
  <data key="d3">3103</data>
  <data key="d6">0.0</data>
  <data key="d4">0.0</data>
</node>
<node id="1091">
  <data key="d0">Eggs</data>
  <data key="d1">Wolfsburg; Stadt</data>
  <data key="d2">Store_EdekaSuedbayern</data>
  <data key="d3">3103</data>
  <data key="d6">0.0</data>
  <data key="d4">0.0</data>
</node>
<node id="1092">
  <data key="d0">Eggs</data>
  <data key="d1">Wolfsburg; Stadt</data>
  <data key="d2">Warehouse_EdekaSuedwest</data>
  <data key="d3">3103</data>
  <data key="d6">0.0</data>
  <data key="d4">0.0</data>
</node>
<node id="1093">
  <data key="d0">Eggs</data>
  <data key="d1">Wolfsburg; Stadt</data>
  <data key="d2">Store_EdekaSuedwest</data>
  <data key="d3">3103</data>
  <data key="d6">0.0</data>
  <data key="d4">0.0</data>
</node>
<node id="1094">
  <data key="d0">Eggs</data>
  <data key="d1">Wolfsburg; Stadt</data>
  <data key="d2">Warehouse_Globus</data>
  <data key="d3">3103</data>
  <data key="d6">0.0</data>
  <data key="d4">0.0</data>
</node>
<node id="1095">
  <data key="d0">Eggs</data>
  <data key="d1">Wolfsburg; Stadt</data>
  <data key="d2">Store_Globus</data>
  <data key="d3">3103</data>
  <data key="d6">0.0</data>
  <data key="d4">0.0</data>
</node>
<node id="1096">
  <data key="d0">Eggs</data>
  <data key="d1">Wolfsburg; Stadt</data>
  <data key="d2">Warehouse_Kaes</data>
  <data key="d3">3103</data>
  <data key="d6">0.0</data>
  <data key="d4">0.0</data>
</node>
<node id="1097">
  <data key="d0">Eggs</data>
  <data key="d1">Wolfsburg; Stadt</data>
  <data key="d2">Store_Kaes</data>
  <data key="d3">3103</data>
  <data key="d6">0.0</data>
  <data key="d4">0.0</data>
</node>
<node id="1098">
  <data key="d0">Eggs</data>
  <data key="d1">Wolfsburg; Stadt</data>
  <data key="d2">Warehouse_KaisersTengelmann</data>
  <data key="d3">3103</data>
  <data key="d6">0.0</data>
  <data key="d4">0.0</data>
</node>
<node id="1099">
  <data key="d0">Eggs</data>
  <data key="d1">Wolfsburg; Stadt</data>
  <data key="d2">Store_KaisersTengelmann</data>
  <data key="d3">3103</data>
  <data key="d6">0.0</data>
  <data key="d4">0.0</data>
</node>
<node id="1100">
  <data key="d0">Eggs</data>
  <data key="d1">Wolfsburg; Stadt</data>
  <data key="d2">Warehouse_Kaufland</data>
  <data key="d3">3103</data>
  <data key="d6">0.0</data>
  <data key="d4">0.0</data>
</node>
<node id="1101">
  <data key="d0">Eggs</data>
  <data key="d1">Wolfsburg; Stadt</data>
  <data key="d2">Store_Kaufland</data>
  <data key="d3">3103</data>
  <data key="d6">0.0</data>
  <data key="d4">0.0</data>
</node>
<node id="1102">
  <data key="d0">Eggs</data>
  <data key="d1">Wolfsburg; Stadt</data>
  <data key="d2">Warehouse_KlaasKock</data>
  <data key="d3">3103</data>
  <data key="d6">0.0</data>
  <data key="d4">0.0</data>
</node>
<node id="1103">
  <data key="d0">Eggs</data>
  <data key="d1">Wolfsburg; Stadt</data>
  <data key="d2">Store_KlaasKock</data>
  <data key="d3">3103</data>
  <data key="d6">0.0</data>
  <data key="d4">0.0</data>
</node>
<node id="1104">
  <data key="d0">Eggs</data>
  <data key="d1">Wolfsburg; Stadt</data>
  <data key="d2">Warehouse_Lidl</data>
  <data key="d3">3103</data>
  <data key="d6">0.0</data>
  <data key="d4">0.0</data>
</node>
<node id="1105">
  <data key="d0">Eggs</data>
  <data key="d1">Wolfsburg; Stadt</data>
  <data key="d2">Store_Lidl</data>
  <data key="d3">3103</data>
  <data key="d6">56.4294131208531</data>
  <data key="d4">56.4294131208531</data>
</node>
<node id="1106">
  <data key="d0">Eggs</data>
  <data key="d1">Wolfsburg; Stadt</data>
  <data key="d2">Warehouse_Netto</data>
  <data key="d3">3103</data>
  <data key="d6">0.0</data>
  <data key="d4">0.0</data>
</node>
<node id="1107">
  <data key="d0">Eggs</data>
  <data key="d1">Wolfsburg; Stadt</data>
  <data key="d2">Store_Netto</data>
  <data key="d3">3103</data>
  <data key="d6">40.90962278122161</data>
  <data key="d4">40.90962278122161</data>
</node>
<node id="1108">
  <data key="d0">Eggs</data>
  <data key="d1">Wolfsburg; Stadt</data>
  <data key="d2">Warehouse_NettoNord</data>
  <data key="d3">3103</data>
  <data key="d6">0.0</data>
  <data key="d4">0.0</data>
</node>
<node id="1109">
  <data key="d0">Eggs</data>
  <data key="d1">Wolfsburg; Stadt</data>
  <data key="d2">Store_NettoNord</data>
  <data key="d3">3103</data>
  <data key="d6">0.0</data>
  <data key="d4">0.0</data>
</node>
<node id="1110">
  <data key="d0">Eggs</data>
  <data key="d1">Wolfsburg; Stadt</data>
  <data key="d2">Warehouse_Norma</data>
  <data key="d3">3103</data>
  <data key="d6">0.0</data>
  <data key="d4">0.0</data>
</node>
<node id="1111">
  <data key="d0">Eggs</data>
  <data key="d1">Wolfsburg; Stadt</data>
  <data key="d2">Store_Norma</data>
  <data key="d3">3103</data>
  <data key="d6">0.0</data>
  <data key="d4">0.0</data>
</node>
<node id="1112">
  <data key="d0">Eggs</data>
  <data key="d1">Wolfsburg; Stadt</data>
  <data key="d2">Warehouse_Penny</data>
  <data key="d3">3103</data>
  <data key="d6">0.0</data>
  <data key="d4">0.0</data>
</node>
<node id="1113">
  <data key="d0">Eggs</data>
  <data key="d1">Wolfsburg; Stadt</data>
  <data key="d2">Store_Penny</data>
  <data key="d3">3103</data>
  <data key="d6">136.37675414671796</data>
  <data key="d4">136.37675414671796</data>
</node>
<node id="1114">
  <data key="d0">Eggs</data>
  <data key="d1">Wolfsburg; Stadt</data>
  <data key="d2">Warehouse_Real</data>
  <data key="d3">3103</data>
  <data key="d6">0.0</data>
  <data key="d4">0.0</data>
</node>
<node id="1115">
  <data key="d0">Eggs</data>
  <data key="d1">Wolfsburg; Stadt</data>
  <data key="d2">Store_Real</data>
  <data key="d3">3103</data>
  <data key="d6">265.4020286588737</data>
  <data key="d4">265.4020286588737</data>
</node>
<node id="1116">
  <data key="d0">Eggs</data>
  <data key="d1">Wolfsburg; Stadt</data>
  <data key="d2">Warehouse_ReweHit</data>
  <data key="d3">3103</data>
  <data key="d6">0.0</data>
  <data key="d4">0.0</data>
</node>
<node id="1117">
  <data key="d0">Eggs</data>
  <data key="d1">Wolfsburg; Stadt</data>
  <data key="d2">Store_ReweHit</data>
  <data key="d3">3103</data>
  <data key="d6">119.29137092194821</data>
  <data key="d4">119.29137092194821</data>
</node>
<node id="1118">
  <data key="d0">Eggs</data>
  <data key="d1">Wolfsburg; Stadt</data>
  <data key="d2">Warehouse_Tegut</data>
  <data key="d3">3103</data>
  <data key="d6">0.0</data>
  <data key="d4">0.0</data>
</node>
<node id="1119">
  <data key="d0">Eggs</data>
  <data key="d1">Wolfsburg; Stadt</data>
  <data key="d2">Store_Tegut</data>
  <data key="d3">3103</data>
  <data key="d6">0.0</data>
  <data key="d4">0.0</data>
</node>
<node id="1120">
  <data key="d0">Eggs</data>
  <data key="d1">Wolfsburg; Stadt</data>
  <data key="d2">Warehouse_Wasgau</data>
  <data key="d3">3103</data>
  <data key="d6">0.0</data>
  <data key="d4">0.0</data>
</node>
<node id="1121">
  <data key="d0">Eggs</data>
  <data key="d1">Wolfsburg; Stadt</data>
  <data key="d2">Store_Wasgau</data>
  <data key="d3">3103</data>
  <data key="d6">0.0</data>
  <data key="d4">0.0</data>
</node>
<node id="1122">
  <data key="d0">Eggs</data>
  <data key="d1">Gifhorn</data>
  <data key="d2">Producer</data>
  <data key="d3">3151</data>
  <data key="d4">426.5381804313951</data>
</node>
<node id="1123">
  <data key="d0">Eggs</data>
  <data key="d1">Gifhorn</data>
  <data key="d2">Consumer</data>
  <data key="d3">3151</data>
  <data key="d5">1594.9613794668714</data>
</node>
<node id="1124">
  <data key="d0">Eggs</data>
  <data key="d1">Gifhorn</data>
  <data key="d2">Wholesale</data>
  <data key="d3">3151</data>
  <data key="d6">263.16862761203384</data>
  <data key="d4">263.16862761203384</data>
</node>
<node id="1125">
  <data key="d0">Eggs</data>
  <data key="d1">Gifhorn</data>
  <data key="d2">Warehouse_AldiNord</data>
  <data key="d3">3151</data>
  <data key="d6">0.0</data>
  <data key="d4">0.0</data>
</node>
<node id="1126">
  <data key="d0">Eggs</data>
  <data key="d1">Gifhorn</data>
  <data key="d2">Store_AldiNord</data>
  <data key="d3">3151</data>
  <data key="d6">188.64669200453807</data>
  <data key="d4">188.64669200453807</data>
</node>
<node id="1127">
  <data key="d0">Eggs</data>
  <data key="d1">Gifhorn</data>
  <data key="d2">Warehouse_AldiSued</data>
  <data key="d3">3151</data>
  <data key="d6">0.0</data>
  <data key="d4">0.0</data>
</node>
<node id="1128">
  <data key="d0">Eggs</data>
  <data key="d1">Gifhorn</data>
  <data key="d2">Store_AldiSued</data>
  <data key="d3">3151</data>
  <data key="d6">0.0</data>
  <data key="d4">0.0</data>
</node>
<node id="1129">
  <data key="d0">Eggs</data>
  <data key="d1">Gifhorn</data>
  <data key="d2">Warehouse_Alnatura</data>
  <data key="d3">3151</data>
  <data key="d6">0.0</data>
  <data key="d4">0.0</data>
</node>
<node id="1130">
  <data key="d0">Eggs</data>
  <data key="d1">Gifhorn</data>
  <data key="d2">Store_Alnatura</data>
  <data key="d3">3151</data>
  <data key="d6">0.0</data>
  <data key="d4">0.0</data>
</node>
<node id="1131">
  <data key="d0">Eggs</data>
  <data key="d1">Gifhorn</data>
  <data key="d2">Warehouse_BartelsLangness</data>
  <data key="d3">3151</data>
  <data key="d6">0.0</data>
  <data key="d4">0.0</data>
</node>
<node id="1132">
  <data key="d0">Eggs</data>
  <data key="d1">Gifhorn</data>
  <data key="d2">Store_BartelsLangness</data>
  <data key="d3">3151</data>
  <data key="d6">40.9569219219292</data>
  <data key="d4">40.9569219219292</data>
</node>
<node id="1133">
  <data key="d0">Eggs</data>
  <data key="d1">Gifhorn</data>
  <data key="d2">Warehouse_Buenting</data>
  <data key="d3">3151</data>
  <data key="d6">0.0</data>
  <data key="d4">0.0</data>
</node>
<node id="1134">
  <data key="d0">Eggs</data>
  <data key="d1">Gifhorn</data>
  <data key="d2">Store_Buenting</data>
  <data key="d3">3151</data>
  <data key="d6">0.0</data>
  <data key="d4">0.0</data>
</node>
<node id="1135">
  <data key="d0">Eggs</data>
  <data key="d1">Gifhorn</data>
  <data key="d2">Warehouse_Coop</data>
  <data key="d3">3151</data>
  <data key="d6">0.0</data>
  <data key="d4">0.0</data>
</node>
<node id="1136">
  <data key="d0">Eggs</data>
  <data key="d1">Gifhorn</data>
  <data key="d2">Store_Coop</data>
  <data key="d3">3151</data>
  <data key="d6">0.0</data>
  <data key="d4">0.0</data>
</node>
<node id="1137">
  <data key="d0">Eggs</data>
  <data key="d1">Gifhorn</data>
  <data key="d2">Warehouse_Dennree</data>
  <data key="d3">3151</data>
  <data key="d6">0.0</data>
  <data key="d4">0.0</data>
</node>
<node id="1138">
  <data key="d0">Eggs</data>
  <data key="d1">Gifhorn</data>
  <data key="d2">Store_Dennree</data>
  <data key="d3">3151</data>
  <data key="d6">0.0</data>
  <data key="d4">0.0</data>
</node>
<node id="1139">
  <data key="d0">Eggs</data>
  <data key="d1">Gifhorn</data>
  <data key="d2">Warehouse_EdekaHessenring</data>
  <data key="d3">3151</data>
  <data key="d6">0.0</data>
  <data key="d4">0.0</data>
</node>
<node id="1140">
  <data key="d0">Eggs</data>
  <data key="d1">Gifhorn</data>
  <data key="d2">Store_EdekaHessenring</data>
  <data key="d3">3151</data>
  <data key="d6">0.0</data>
  <data key="d4">0.0</data>
</node>
<node id="1141">
  <data key="d0">Eggs</data>
  <data key="d1">Gifhorn</data>
  <data key="d2">Warehouse_EdekaMindenHannover</data>
  <data key="d3">3151</data>
  <data key="d6">0.0</data>
  <data key="d4">0.0</data>
</node>
<node id="1142">
  <data key="d0">Eggs</data>
  <data key="d1">Gifhorn</data>
  <data key="d2">Store_EdekaMindenHannover</data>
  <data key="d3">3151</data>
  <data key="d6">398.84770614371456</data>
  <data key="d4">398.84770614371456</data>
</node>
<node id="1143">
  <data key="d0">Eggs</data>
  <data key="d1">Gifhorn</data>
  <data key="d2">Warehouse_EdekaNord</data>
  <data key="d3">3151</data>
  <data key="d6">0.0</data>
  <data key="d4">0.0</data>
</node>
<node id="1144">
  <data key="d0">Eggs</data>
  <data key="d1">Gifhorn</data>
  <data key="d2">Store_EdekaNord</data>
  <data key="d3">3151</data>
  <data key="d6">0.0</data>
  <data key="d4">0.0</data>
</node>
<node id="1145">
  <data key="d0">Eggs</data>
  <data key="d1">Gifhorn</data>
  <data key="d2">Warehouse_EdekaNordbayern</data>
  <data key="d3">3151</data>
  <data key="d6">0.0</data>
  <data key="d4">0.0</data>
</node>
<node id="1146">
  <data key="d0">Eggs</data>
  <data key="d1">Gifhorn</data>
  <data key="d2">Store_EdekaNordbayern</data>
  <data key="d3">3151</data>
  <data key="d6">0.0</data>
  <data key="d4">0.0</data>
</node>
<node id="1147">
  <data key="d0">Eggs</data>
  <data key="d1">Gifhorn</data>
  <data key="d2">Warehouse_EdekaRheinRuhr</data>
  <data key="d3">3151</data>
  <data key="d6">0.0</data>
  <data key="d4">0.0</data>
</node>
<node id="1148">
  <data key="d0">Eggs</data>
  <data key="d1">Gifhorn</data>
  <data key="d2">Store_EdekaRheinRuhr</data>
  <data key="d3">3151</data>
  <data key="d6">0.0</data>
  <data key="d4">0.0</data>
</node>
<node id="1149">
  <data key="d0">Eggs</data>
  <data key="d1">Gifhorn</data>
  <data key="d2">Warehouse_EdekaSuedbayern</data>
  <data key="d3">3151</data>
  <data key="d6">0.0</data>
  <data key="d4">0.0</data>
</node>
<node id="1150">
  <data key="d0">Eggs</data>
  <data key="d1">Gifhorn</data>
  <data key="d2">Store_EdekaSuedbayern</data>
  <data key="d3">3151</data>
  <data key="d6">0.0</data>
  <data key="d4">0.0</data>
</node>
<node id="1151">
  <data key="d0">Eggs</data>
  <data key="d1">Gifhorn</data>
  <data key="d2">Warehouse_EdekaSuedwest</data>
  <data key="d3">3151</data>
  <data key="d6">0.0</data>
  <data key="d4">0.0</data>
</node>
<node id="1152">
  <data key="d0">Eggs</data>
  <data key="d1">Gifhorn</data>
  <data key="d2">Store_EdekaSuedwest</data>
  <data key="d3">3151</data>
  <data key="d6">0.0</data>
  <data key="d4">0.0</data>
</node>
<node id="1153">
  <data key="d0">Eggs</data>
  <data key="d1">Gifhorn</data>
  <data key="d2">Warehouse_Globus</data>
  <data key="d3">3151</data>
  <data key="d6">0.0</data>
  <data key="d4">0.0</data>
</node>
<node id="1154">
  <data key="d0">Eggs</data>
  <data key="d1">Gifhorn</data>
  <data key="d2">Store_Globus</data>
  <data key="d3">3151</data>
  <data key="d6">0.0</data>
  <data key="d4">0.0</data>
</node>
<node id="1155">
  <data key="d0">Eggs</data>
  <data key="d1">Gifhorn</data>
  <data key="d2">Warehouse_Kaes</data>
  <data key="d3">3151</data>
  <data key="d6">0.0</data>
  <data key="d4">0.0</data>
</node>
<node id="1156">
  <data key="d0">Eggs</data>
  <data key="d1">Gifhorn</data>
  <data key="d2">Store_Kaes</data>
  <data key="d3">3151</data>
  <data key="d6">0.0</data>
  <data key="d4">0.0</data>
</node>
<node id="1157">
  <data key="d0">Eggs</data>
  <data key="d1">Gifhorn</data>
  <data key="d2">Warehouse_KaisersTengelmann</data>
  <data key="d3">3151</data>
  <data key="d6">0.0</data>
  <data key="d4">0.0</data>
</node>
<node id="1158">
  <data key="d0">Eggs</data>
  <data key="d1">Gifhorn</data>
  <data key="d2">Store_KaisersTengelmann</data>
  <data key="d3">3151</data>
  <data key="d6">0.0</data>
  <data key="d4">0.0</data>
</node>
<node id="1159">
  <data key="d0">Eggs</data>
  <data key="d1">Gifhorn</data>
  <data key="d2">Warehouse_Kaufland</data>
  <data key="d3">3151</data>
  <data key="d6">0.0</data>
  <data key="d4">0.0</data>
</node>
<node id="1160">
  <data key="d0">Eggs</data>
  <data key="d1">Gifhorn</data>
  <data key="d2">Store_Kaufland</data>
  <data key="d3">3151</data>
  <data key="d6">0.0</data>
  <data key="d4">0.0</data>
</node>
<node id="1161">
  <data key="d0">Eggs</data>
  <data key="d1">Gifhorn</data>
  <data key="d2">Warehouse_KlaasKock</data>
  <data key="d3">3151</data>
  <data key="d6">0.0</data>
  <data key="d4">0.0</data>
</node>
<node id="1162">
  <data key="d0">Eggs</data>
  <data key="d1">Gifhorn</data>
  <data key="d2">Store_KlaasKock</data>
  <data key="d3">3151</data>
  <data key="d6">0.0</data>
  <data key="d4">0.0</data>
</node>
<node id="1163">
  <data key="d0">Eggs</data>
  <data key="d1">Gifhorn</data>
  <data key="d2">Warehouse_Lidl</data>
  <data key="d3">3151</data>
  <data key="d6">0.0</data>
  <data key="d4">0.0</data>
</node>
<node id="1164">
  <data key="d0">Eggs</data>
  <data key="d1">Gifhorn</data>
  <data key="d2">Store_Lidl</data>
  <data key="d3">3151</data>
  <data key="d6">164.0502796546838</data>
  <data key="d4">164.0502796546838</data>
</node>
<node id="1165">
  <data key="d0">Eggs</data>
  <data key="d1">Gifhorn</data>
  <data key="d2">Warehouse_Netto</data>
  <data key="d3">3151</data>
  <data key="d6">0.0</data>
  <data key="d4">0.0</data>
</node>
<node id="1166">
  <data key="d0">Eggs</data>
  <data key="d1">Gifhorn</data>
  <data key="d2">Store_Netto</data>
  <data key="d3">3151</data>
  <data key="d6">122.64817379882061</data>
  <data key="d4">122.64817379882061</data>
</node>
<node id="1167">
  <data key="d0">Eggs</data>
  <data key="d1">Gifhorn</data>
  <data key="d2">Warehouse_NettoNord</data>
  <data key="d3">3151</data>
  <data key="d6">0.0</data>
  <data key="d4">0.0</data>
</node>
<node id="1168">
  <data key="d0">Eggs</data>
  <data key="d1">Gifhorn</data>
  <data key="d2">Store_NettoNord</data>
  <data key="d3">3151</data>
  <data key="d6">0.0</data>
  <data key="d4">0.0</data>
</node>
<node id="1169">
  <data key="d0">Eggs</data>
  <data key="d1">Gifhorn</data>
  <data key="d2">Warehouse_Norma</data>
  <data key="d3">3151</data>
  <data key="d6">0.0</data>
  <data key="d4">0.0</data>
</node>
<node id="1170">
  <data key="d0">Eggs</data>
  <data key="d1">Gifhorn</data>
  <data key="d2">Store_Norma</data>
  <data key="d3">3151</data>
  <data key="d6">8.310100100101579</data>
  <data key="d4">8.310100100101579</data>
</node>
<node id="1171">
  <data key="d0">Eggs</data>
  <data key="d1">Gifhorn</data>
  <data key="d2">Warehouse_Penny</data>
  <data key="d3">3151</data>
  <data key="d6">0.0</data>
  <data key="d4">0.0</data>
</node>
<node id="1172">
  <data key="d0">Eggs</data>
  <data key="d1">Gifhorn</data>
  <data key="d2">Store_Penny</data>
  <data key="d3">3151</data>
  <data key="d6">136.26338244496915</data>
  <data key="d4">136.26338244496915</data>
</node>
<node id="1173">
  <data key="d0">Eggs</data>
  <data key="d1">Gifhorn</data>
  <data key="d2">Warehouse_Real</data>
  <data key="d3">3151</data>
  <data key="d6">0.0</data>
  <data key="d4">0.0</data>
</node>
<node id="1174">
  <data key="d0">Eggs</data>
  <data key="d1">Gifhorn</data>
  <data key="d2">Store_Real</data>
  <data key="d3">3151</data>
  <data key="d6">122.94496308810994</data>
  <data key="d4">122.94496308810994</data>
</node>
<node id="1175">
  <data key="d0">Eggs</data>
  <data key="d1">Gifhorn</data>
  <data key="d2">Warehouse_ReweHit</data>
  <data key="d3">3151</data>
  <data key="d6">0.0</data>
  <data key="d4">0.0</data>
</node>
<node id="1176">
  <data key="d0">Eggs</data>
  <data key="d1">Gifhorn</data>
  <data key="d2">Store_ReweHit</data>
  <data key="d3">3151</data>
  <data key="d6">122.64817379882061</data>
  <data key="d4">122.64817379882061</data>
</node>
<node id="1177">
  <data key="d0">Eggs</data>
  <data key="d1">Gifhorn</data>
  <data key="d2">Warehouse_Tegut</data>
  <data key="d3">3151</data>
  <data key="d6">0.0</data>
  <data key="d4">0.0</data>
</node>
<node id="1178">
  <data key="d0">Eggs</data>
  <data key="d1">Gifhorn</data>
  <data key="d2">Store_Tegut</data>
  <data key="d3">3151</data>
  <data key="d6">0.0</data>
  <data key="d4">0.0</data>
</node>
<node id="1179">
  <data key="d0">Eggs</data>
  <data key="d1">Gifhorn</data>
  <data key="d2">Warehouse_Wasgau</data>
  <data key="d3">3151</data>
  <data key="d6">0.0</data>
  <data key="d4">0.0</data>
</node>
<node id="1180">
  <data key="d0">Eggs</data>
  <data key="d1">Gifhorn</data>
  <data key="d2">Store_Wasgau</data>
  <data key="d3">3151</data>
  <data key="d6">0.0</data>
  <data key="d4">0.0</data>
</node>
<node id="1181">
  <data key="d0">Eggs</data>
  <data key="d1">Göttingen</data>
  <data key="d2">Producer</data>
  <data key="d3">3152</data>
  <data key="d4">195.97753048436888</data>
</node>
<node id="1182">
  <data key="d0">Eggs</data>
  <data key="d1">Göttingen</data>
  <data key="d2">Consumer</data>
  <data key="d3">3152</data>
  <data key="d5">2312.8455549000414</data>
</node>
<node id="1183">
  <data key="d0">Eggs</data>
  <data key="d1">Göttingen</data>
  <data key="d2">Wholesale</data>
  <data key="d3">3152</data>
  <data key="d6">381.61951655850686</data>
  <data key="d4">381.61951655850686</data>
</node>
<node id="1184">
  <data key="d0">Eggs</data>
  <data key="d1">Göttingen</data>
  <data key="d2">Warehouse_AldiNord</data>
  <data key="d3">3152</data>
  <data key="d6">1406.127860974916</data>
  <data key="d4">1406.127860974916</data>
</node>
<node id="1185">
  <data key="d0">Eggs</data>
  <data key="d1">Göttingen</data>
  <data key="d2">Store_AldiNord</data>
  <data key="d3">3152</data>
  <data key="d6">241.5207187292815</data>
  <data key="d4">241.5207187292815</data>
</node>
<node id="1186">
  <data key="d0">Eggs</data>
  <data key="d1">Göttingen</data>
  <data key="d2">Warehouse_AldiSued</data>
  <data key="d3">3152</data>
  <data key="d6">0.0</data>
  <data key="d4">0.0</data>
</node>
<node id="1187">
  <data key="d0">Eggs</data>
  <data key="d1">Göttingen</data>
  <data key="d2">Store_AldiSued</data>
  <data key="d3">3152</data>
  <data key="d6">0.0</data>
  <data key="d4">0.0</data>
</node>
<node id="1188">
  <data key="d0">Eggs</data>
  <data key="d1">Göttingen</data>
  <data key="d2">Warehouse_Alnatura</data>
  <data key="d3">3152</data>
  <data key="d6">0.0</data>
  <data key="d4">0.0</data>
</node>
<node id="1189">
  <data key="d0">Eggs</data>
  <data key="d1">Göttingen</data>
  <data key="d2">Store_Alnatura</data>
  <data key="d3">3152</data>
  <data key="d6">25.67463759050458</data>
  <data key="d4">25.67463759050458</data>
</node>
<node id="1190">
  <data key="d0">Eggs</data>
  <data key="d1">Göttingen</data>
  <data key="d2">Warehouse_BartelsLangness</data>
  <data key="d3">3152</data>
  <data key="d6">0.0</data>
  <data key="d4">0.0</data>
</node>
<node id="1191">
  <data key="d0">Eggs</data>
  <data key="d1">Göttingen</data>
  <data key="d2">Store_BartelsLangness</data>
  <data key="d3">3152</data>
  <data key="d6">0.0</data>
  <data key="d4">0.0</data>
</node>
<node id="1192">
  <data key="d0">Eggs</data>
  <data key="d1">Göttingen</data>
  <data key="d2">Warehouse_Buenting</data>
  <data key="d3">3152</data>
  <data key="d6">0.0</data>
  <data key="d4">0.0</data>
</node>
<node id="1193">
  <data key="d0">Eggs</data>
  <data key="d1">Göttingen</data>
  <data key="d2">Store_Buenting</data>
  <data key="d3">3152</data>
  <data key="d6">0.0</data>
  <data key="d4">0.0</data>
</node>
<node id="1194">
  <data key="d0">Eggs</data>
  <data key="d1">Göttingen</data>
  <data key="d2">Warehouse_Coop</data>
  <data key="d3">3152</data>
  <data key="d6">0.0</data>
  <data key="d4">0.0</data>
</node>
<node id="1195">
  <data key="d0">Eggs</data>
  <data key="d1">Göttingen</data>
  <data key="d2">Store_Coop</data>
  <data key="d3">3152</data>
  <data key="d6">0.0</data>
  <data key="d4">0.0</data>
</node>
<node id="1196">
  <data key="d0">Eggs</data>
  <data key="d1">Göttingen</data>
  <data key="d2">Warehouse_Dennree</data>
  <data key="d3">3152</data>
  <data key="d6">0.0</data>
  <data key="d4">0.0</data>
</node>
<node id="1197">
  <data key="d0">Eggs</data>
  <data key="d1">Göttingen</data>
  <data key="d2">Store_Dennree</data>
  <data key="d3">3152</data>
  <data key="d6">10.337027053153735</data>
  <data key="d4">10.337027053153735</data>
</node>
<node id="1198">
  <data key="d0">Eggs</data>
  <data key="d1">Göttingen</data>
  <data key="d2">Warehouse_EdekaHessenring</data>
  <data key="d3">3152</data>
  <data key="d6">0.0</data>
  <data key="d4">0.0</data>
</node>
<node id="1199">
  <data key="d0">Eggs</data>
  <data key="d1">Göttingen</data>
  <data key="d2">Store_EdekaHessenring</data>
  <data key="d3">3152</data>
  <data key="d6">325.7842822167224</data>
  <data key="d4">325.7842822167224</data>
</node>
<node id="1200">
  <data key="d0">Eggs</data>
  <data key="d1">Göttingen</data>
  <data key="d2">Warehouse_EdekaMindenHannover</data>
  <data key="d3">3152</data>
  <data key="d6">0.0</data>
  <data key="d4">0.0</data>
</node>
<node id="1201">
  <data key="d0">Eggs</data>
  <data key="d1">Göttingen</data>
  <data key="d2">Store_EdekaMindenHannover</data>
  <data key="d3">3152</data>
  <data key="d6">0.0</data>
  <data key="d4">0.0</data>
</node>
<node id="1202">
  <data key="d0">Eggs</data>
  <data key="d1">Göttingen</data>
  <data key="d2">Warehouse_EdekaNord</data>
  <data key="d3">3152</data>
  <data key="d6">0.0</data>
  <data key="d4">0.0</data>
</node>
<node id="1203">
  <data key="d0">Eggs</data>
  <data key="d1">Göttingen</data>
  <data key="d2">Store_EdekaNord</data>
  <data key="d3">3152</data>
  <data key="d6">0.0</data>
  <data key="d4">0.0</data>
</node>
<node id="1204">
  <data key="d0">Eggs</data>
  <data key="d1">Göttingen</data>
  <data key="d2">Warehouse_EdekaNordbayern</data>
  <data key="d3">3152</data>
  <data key="d6">0.0</data>
  <data key="d4">0.0</data>
</node>
<node id="1205">
  <data key="d0">Eggs</data>
  <data key="d1">Göttingen</data>
  <data key="d2">Store_EdekaNordbayern</data>
  <data key="d3">3152</data>
  <data key="d6">0.0</data>
  <data key="d4">0.0</data>
</node>
<node id="1206">
  <data key="d0">Eggs</data>
  <data key="d1">Göttingen</data>
  <data key="d2">Warehouse_EdekaRheinRuhr</data>
  <data key="d3">3152</data>
  <data key="d6">0.0</data>
  <data key="d4">0.0</data>
</node>
<node id="1207">
  <data key="d0">Eggs</data>
  <data key="d1">Göttingen</data>
  <data key="d2">Store_EdekaRheinRuhr</data>
  <data key="d3">3152</data>
  <data key="d6">0.0</data>
  <data key="d4">0.0</data>
</node>
<node id="1208">
  <data key="d0">Eggs</data>
  <data key="d1">Göttingen</data>
  <data key="d2">Warehouse_EdekaSuedbayern</data>
  <data key="d3">3152</data>
  <data key="d6">0.0</data>
  <data key="d4">0.0</data>
</node>
<node id="1209">
  <data key="d0">Eggs</data>
  <data key="d1">Göttingen</data>
  <data key="d2">Store_EdekaSuedbayern</data>
  <data key="d3">3152</data>
  <data key="d6">0.0</data>
  <data key="d4">0.0</data>
</node>
<node id="1210">
  <data key="d0">Eggs</data>
  <data key="d1">Göttingen</data>
  <data key="d2">Warehouse_EdekaSuedwest</data>
  <data key="d3">3152</data>
  <data key="d6">0.0</data>
  <data key="d4">0.0</data>
</node>
<node id="1211">
  <data key="d0">Eggs</data>
  <data key="d1">Göttingen</data>
  <data key="d2">Store_EdekaSuedwest</data>
  <data key="d3">3152</data>
  <data key="d6">0.0</data>
  <data key="d4">0.0</data>
</node>
<node id="1212">
  <data key="d0">Eggs</data>
  <data key="d1">Göttingen</data>
  <data key="d2">Warehouse_Globus</data>
  <data key="d3">3152</data>
  <data key="d6">0.0</data>
  <data key="d4">0.0</data>
</node>
<node id="1213">
  <data key="d0">Eggs</data>
  <data key="d1">Göttingen</data>
  <data key="d2">Store_Globus</data>
  <data key="d3">3152</data>
  <data key="d6">0.0</data>
  <data key="d4">0.0</data>
</node>
<node id="1214">
  <data key="d0">Eggs</data>
  <data key="d1">Göttingen</data>
  <data key="d2">Warehouse_Kaes</data>
  <data key="d3">3152</data>
  <data key="d6">0.0</data>
  <data key="d4">0.0</data>
</node>
<node id="1215">
  <data key="d0">Eggs</data>
  <data key="d1">Göttingen</data>
  <data key="d2">Store_Kaes</data>
  <data key="d3">3152</data>
  <data key="d6">0.0</data>
  <data key="d4">0.0</data>
</node>
<node id="1216">
  <data key="d0">Eggs</data>
  <data key="d1">Göttingen</data>
  <data key="d2">Warehouse_KaisersTengelmann</data>
  <data key="d3">3152</data>
  <data key="d6">0.0</data>
  <data key="d4">0.0</data>
</node>
<node id="1217">
  <data key="d0">Eggs</data>
  <data key="d1">Göttingen</data>
  <data key="d2">Store_KaisersTengelmann</data>
  <data key="d3">3152</data>
  <data key="d6">0.0</data>
  <data key="d4">0.0</data>
</node>
<node id="1218">
  <data key="d0">Eggs</data>
  <data key="d1">Göttingen</data>
  <data key="d2">Warehouse_Kaufland</data>
  <data key="d3">3152</data>
  <data key="d6">0.0</data>
  <data key="d4">0.0</data>
</node>
<node id="1219">
  <data key="d0">Eggs</data>
  <data key="d1">Göttingen</data>
  <data key="d2">Store_Kaufland</data>
  <data key="d3">3152</data>
  <data key="d6">198.717216816042</data>
  <data key="d4">198.717216816042</data>
</node>
<node id="1220">
  <data key="d0">Eggs</data>
  <data key="d1">Göttingen</data>
  <data key="d2">Warehouse_KlaasKock</data>
  <data key="d3">3152</data>
  <data key="d6">0.0</data>
  <data key="d4">0.0</data>
</node>
<node id="1221">
  <data key="d0">Eggs</data>
  <data key="d1">Göttingen</data>
  <data key="d2">Store_KlaasKock</data>
  <data key="d3">3152</data>
  <data key="d6">0.0</data>
  <data key="d4">0.0</data>
</node>
<node id="1222">
  <data key="d0">Eggs</data>
  <data key="d1">Göttingen</data>
  <data key="d2">Warehouse_Lidl</data>
  <data key="d3">3152</data>
  <data key="d6">0.0</data>
  <data key="d4">0.0</data>
</node>
<node id="1223">
  <data key="d0">Eggs</data>
  <data key="d1">Göttingen</data>
  <data key="d2">Store_Lidl</data>
  <data key="d3">3152</data>
  <data key="d6">165.01925497850473</data>
  <data key="d4">165.01925497850473</data>
</node>
<node id="1224">
  <data key="d0">Eggs</data>
  <data key="d1">Göttingen</data>
  <data key="d2">Warehouse_Netto</data>
  <data key="d3">3152</data>
  <data key="d6">0.0</data>
  <data key="d4">0.0</data>
</node>
<node id="1225">
  <data key="d0">Eggs</data>
  <data key="d1">Göttingen</data>
  <data key="d2">Store_Netto</data>
  <data key="d3">3152</data>
  <data key="d6">67.28397031348804</data>
  <data key="d4">67.28397031348804</data>
</node>
<node id="1226">
  <data key="d0">Eggs</data>
  <data key="d1">Göttingen</data>
  <data key="d2">Warehouse_NettoNord</data>
  <data key="d3">3152</data>
  <data key="d6">0.0</data>
  <data key="d4">0.0</data>
</node>
<node id="1227">
  <data key="d0">Eggs</data>
  <data key="d1">Göttingen</data>
  <data key="d2">Store_NettoNord</data>
  <data key="d3">3152</data>
  <data key="d6">0.0</data>
  <data key="d4">0.0</data>
</node>
<node id="1228">
  <data key="d0">Eggs</data>
  <data key="d1">Göttingen</data>
  <data key="d2">Warehouse_Norma</data>
  <data key="d3">3152</data>
  <data key="d6">0.0</data>
  <data key="d4">0.0</data>
</node>
<node id="1229">
  <data key="d0">Eggs</data>
  <data key="d1">Göttingen</data>
  <data key="d2">Store_Norma</data>
  <data key="d3">3152</data>
  <data key="d6">0.0</data>
  <data key="d4">0.0</data>
</node>
<node id="1230">
  <data key="d0">Eggs</data>
  <data key="d1">Göttingen</data>
  <data key="d2">Warehouse_Penny</data>
  <data key="d3">3152</data>
  <data key="d6">0.0</data>
  <data key="d4">0.0</data>
</node>
<node id="1231">
  <data key="d0">Eggs</data>
  <data key="d1">Göttingen</data>
  <data key="d2">Store_Penny</data>
  <data key="d3">3152</data>
  <data key="d6">74.7475277525882</data>
  <data key="d4">74.7475277525882</data>
</node>
<node id="1232">
  <data key="d0">Eggs</data>
  <data key="d1">Göttingen</data>
  <data key="d2">Warehouse_Real</data>
  <data key="d3">3152</data>
  <data key="d6">0.0</data>
  <data key="d4">0.0</data>
</node>
<node id="1233">
  <data key="d0">Eggs</data>
  <data key="d1">Göttingen</data>
  <data key="d2">Store_Real</data>
  <data key="d3">3152</data>
  <data key="d6">247.37961131897515</data>
  <data key="d4">247.37961131897515</data>
</node>
<node id="1234">
  <data key="d0">Eggs</data>
  <data key="d1">Göttingen</data>
  <data key="d2">Warehouse_ReweHit</data>
  <data key="d3">3152</data>
  <data key="d6">0.0</data>
  <data key="d4">0.0</data>
</node>
<node id="1235">
  <data key="d0">Eggs</data>
  <data key="d1">Göttingen</data>
  <data key="d2">Store_ReweHit</data>
  <data key="d3">3152</data>
  <data key="d6">440.125982183737</data>
  <data key="d4">440.125982183737</data>
</node>
<node id="1236">
  <data key="d0">Eggs</data>
  <data key="d1">Göttingen</data>
  <data key="d2">Warehouse_Tegut</data>
  <data key="d3">3152</data>
  <data key="d6">0.0</data>
  <data key="d4">0.0</data>
</node>
<node id="1237">
  <data key="d0">Eggs</data>
  <data key="d1">Göttingen</data>
  <data key="d2">Store_Tegut</data>
  <data key="d3">3152</data>
  <data key="d6">96.24257317719669</data>
  <data key="d4">96.24257317719669</data>
</node>
<node id="1238">
  <data key="d0">Eggs</data>
  <data key="d1">Göttingen</data>
  <data key="d2">Warehouse_Wasgau</data>
  <data key="d3">3152</data>
  <data key="d6">0.0</data>
  <data key="d4">0.0</data>
</node>
<node id="1239">
  <data key="d0">Eggs</data>
  <data key="d1">Göttingen</data>
  <data key="d2">Store_Wasgau</data>
  <data key="d3">3152</data>
  <data key="d6">0.0</data>
  <data key="d4">0.0</data>
</node>
<node id="1240">
  <data key="d0">Eggs</data>
  <data key="d1">Goslar</data>
  <data key="d2">Producer</data>
  <data key="d3">3153</data>
  <data key="d4">157.91262636992812</data>
</node>
<node id="1241">
  <data key="d0">Eggs</data>
  <data key="d1">Goslar</data>
  <data key="d2">Consumer</data>
  <data key="d3">3153</data>
  <data key="d5">1293.157735110833</data>
</node>
<node id="1242">
  <data key="d0">Eggs</data>
  <data key="d1">Goslar</data>
  <data key="d2">Wholesale</data>
  <data key="d3">3153</data>
  <data key="d6">213.37102629328746</data>
  <data key="d4">213.37102629328746</data>
</node>
<node id="1243">
  <data key="d0">Eggs</data>
  <data key="d1">Goslar</data>
  <data key="d2">Warehouse_AldiNord</data>
  <data key="d3">3153</data>
  <data key="d6">0.0</data>
  <data key="d4">0.0</data>
</node>
<node id="1244">
  <data key="d0">Eggs</data>
  <data key="d1">Goslar</data>
  <data key="d2">Store_AldiNord</data>
  <data key="d3">3153</data>
  <data key="d6">171.31239339501624</data>
  <data key="d4">171.31239339501624</data>
</node>
<node id="1245">
  <data key="d0">Eggs</data>
  <data key="d1">Goslar</data>
  <data key="d2">Warehouse_AldiSued</data>
  <data key="d3">3153</data>
  <data key="d6">0.0</data>
  <data key="d4">0.0</data>
</node>
<node id="1246">
  <data key="d0">Eggs</data>
  <data key="d1">Goslar</data>
  <data key="d2">Store_AldiSued</data>
  <data key="d3">3153</data>
  <data key="d6">0.0</data>
  <data key="d4">0.0</data>
</node>
<node id="1247">
  <data key="d0">Eggs</data>
  <data key="d1">Goslar</data>
  <data key="d2">Warehouse_Alnatura</data>
  <data key="d3">3153</data>
  <data key="d6">0.0</data>
  <data key="d4">0.0</data>
</node>
<node id="1248">
  <data key="d0">Eggs</data>
  <data key="d1">Goslar</data>
  <data key="d2">Store_Alnatura</data>
  <data key="d3">3153</data>
  <data key="d6">0.0</data>
  <data key="d4">0.0</data>
</node>
<node id="1249">
  <data key="d0">Eggs</data>
  <data key="d1">Goslar</data>
  <data key="d2">Warehouse_BartelsLangness</data>
  <data key="d3">3153</data>
  <data key="d6">0.0</data>
  <data key="d4">0.0</data>
</node>
<node id="1250">
  <data key="d0">Eggs</data>
  <data key="d1">Goslar</data>
  <data key="d2">Store_BartelsLangness</data>
  <data key="d3">3153</data>
  <data key="d6">0.0</data>
  <data key="d4">0.0</data>
</node>
<node id="1251">
  <data key="d0">Eggs</data>
  <data key="d1">Goslar</data>
  <data key="d2">Warehouse_Buenting</data>
  <data key="d3">3153</data>
  <data key="d6">0.0</data>
  <data key="d4">0.0</data>
</node>
<node id="1252">
  <data key="d0">Eggs</data>
  <data key="d1">Goslar</data>
  <data key="d2">Store_Buenting</data>
  <data key="d3">3153</data>
  <data key="d6">0.0</data>
  <data key="d4">0.0</data>
</node>
<node id="1253">
  <data key="d0">Eggs</data>
  <data key="d1">Goslar</data>
  <data key="d2">Warehouse_Coop</data>
  <data key="d3">3153</data>
  <data key="d6">0.0</data>
  <data key="d4">0.0</data>
</node>
<node id="1254">
  <data key="d0">Eggs</data>
  <data key="d1">Goslar</data>
  <data key="d2">Store_Coop</data>
  <data key="d3">3153</data>
  <data key="d6">0.0</data>
  <data key="d4">0.0</data>
</node>
<node id="1255">
  <data key="d0">Eggs</data>
  <data key="d1">Goslar</data>
  <data key="d2">Warehouse_Dennree</data>
  <data key="d3">3153</data>
  <data key="d6">0.0</data>
  <data key="d4">0.0</data>
</node>
<node id="1256">
  <data key="d0">Eggs</data>
  <data key="d1">Goslar</data>
  <data key="d2">Store_Dennree</data>
  <data key="d3">3153</data>
  <data key="d6">1.9762064126317667</data>
  <data key="d4">1.9762064126317667</data>
</node>
<node id="1257">
  <data key="d0">Eggs</data>
  <data key="d1">Goslar</data>
  <data key="d2">Warehouse_EdekaHessenring</data>
  <data key="d3">3153</data>
  <data key="d6">0.0</data>
  <data key="d4">0.0</data>
</node>
<node id="1258">
  <data key="d0">Eggs</data>
  <data key="d1">Goslar</data>
  <data key="d2">Store_EdekaHessenring</data>
  <data key="d3">3153</data>
  <data key="d6">29.982756666647585</data>
  <data key="d4">29.982756666647585</data>
</node>
<node id="1259">
  <data key="d0">Eggs</data>
  <data key="d1">Goslar</data>
  <data key="d2">Warehouse_EdekaMindenHannover</data>
  <data key="d3">3153</data>
  <data key="d6">0.0</data>
  <data key="d4">0.0</data>
</node>
<node id="1260">
  <data key="d0">Eggs</data>
  <data key="d1">Goslar</data>
  <data key="d2">Store_EdekaMindenHannover</data>
  <data key="d3">3153</data>
  <data key="d6">312.642030123385</data>
  <data key="d4">312.642030123385</data>
</node>
<node id="1261">
  <data key="d0">Eggs</data>
  <data key="d1">Goslar</data>
  <data key="d2">Warehouse_EdekaNord</data>
  <data key="d3">3153</data>
  <data key="d6">0.0</data>
  <data key="d4">0.0</data>
</node>
<node id="1262">
  <data key="d0">Eggs</data>
  <data key="d1">Goslar</data>
  <data key="d2">Store_EdekaNord</data>
  <data key="d3">3153</data>
  <data key="d6">0.0</data>
  <data key="d4">0.0</data>
</node>
<node id="1263">
  <data key="d0">Eggs</data>
  <data key="d1">Goslar</data>
  <data key="d2">Warehouse_EdekaNordbayern</data>
  <data key="d3">3153</data>
  <data key="d6">0.0</data>
  <data key="d4">0.0</data>
</node>
<node id="1264">
  <data key="d0">Eggs</data>
  <data key="d1">Goslar</data>
  <data key="d2">Store_EdekaNordbayern</data>
  <data key="d3">3153</data>
  <data key="d6">0.0</data>
  <data key="d4">0.0</data>
</node>
<node id="1265">
  <data key="d0">Eggs</data>
  <data key="d1">Goslar</data>
  <data key="d2">Warehouse_EdekaRheinRuhr</data>
  <data key="d3">3153</data>
  <data key="d6">0.0</data>
  <data key="d4">0.0</data>
</node>
<node id="1266">
  <data key="d0">Eggs</data>
  <data key="d1">Goslar</data>
  <data key="d2">Store_EdekaRheinRuhr</data>
  <data key="d3">3153</data>
  <data key="d6">0.0</data>
  <data key="d4">0.0</data>
</node>
<node id="1267">
  <data key="d0">Eggs</data>
  <data key="d1">Goslar</data>
  <data key="d2">Warehouse_EdekaSuedbayern</data>
  <data key="d3">3153</data>
  <data key="d6">0.0</data>
  <data key="d4">0.0</data>
</node>
<node id="1268">
  <data key="d0">Eggs</data>
  <data key="d1">Goslar</data>
  <data key="d2">Store_EdekaSuedbayern</data>
  <data key="d3">3153</data>
  <data key="d6">0.0</data>
  <data key="d4">0.0</data>
</node>
<node id="1269">
  <data key="d0">Eggs</data>
  <data key="d1">Goslar</data>
  <data key="d2">Warehouse_EdekaSuedwest</data>
  <data key="d3">3153</data>
  <data key="d6">0.0</data>
  <data key="d4">0.0</data>
</node>
<node id="1270">
  <data key="d0">Eggs</data>
  <data key="d1">Goslar</data>
  <data key="d2">Store_EdekaSuedwest</data>
  <data key="d3">3153</data>
  <data key="d6">0.0</data>
  <data key="d4">0.0</data>
</node>
<node id="1271">
  <data key="d0">Eggs</data>
  <data key="d1">Goslar</data>
  <data key="d2">Warehouse_Globus</data>
  <data key="d3">3153</data>
  <data key="d6">0.0</data>
  <data key="d4">0.0</data>
</node>
<node id="1272">
  <data key="d0">Eggs</data>
  <data key="d1">Goslar</data>
  <data key="d2">Store_Globus</data>
  <data key="d3">3153</data>
  <data key="d6">0.0</data>
  <data key="d4">0.0</data>
</node>
<node id="1273">
  <data key="d0">Eggs</data>
  <data key="d1">Goslar</data>
  <data key="d2">Warehouse_Kaes</data>
  <data key="d3">3153</data>
  <data key="d6">0.0</data>
  <data key="d4">0.0</data>
</node>
<node id="1274">
  <data key="d0">Eggs</data>
  <data key="d1">Goslar</data>
  <data key="d2">Store_Kaes</data>
  <data key="d3">3153</data>
  <data key="d6">0.0</data>
  <data key="d4">0.0</data>
</node>
<node id="1275">
  <data key="d0">Eggs</data>
  <data key="d1">Goslar</data>
  <data key="d2">Warehouse_KaisersTengelmann</data>
  <data key="d3">3153</data>
  <data key="d6">0.0</data>
  <data key="d4">0.0</data>
</node>
<node id="1276">
  <data key="d0">Eggs</data>
  <data key="d1">Goslar</data>
  <data key="d2">Store_KaisersTengelmann</data>
  <data key="d3">3153</data>
  <data key="d6">0.0</data>
  <data key="d4">0.0</data>
</node>
<node id="1277">
  <data key="d0">Eggs</data>
  <data key="d1">Goslar</data>
  <data key="d2">Warehouse_Kaufland</data>
  <data key="d3">3153</data>
  <data key="d6">0.0</data>
  <data key="d4">0.0</data>
</node>
<node id="1278">
  <data key="d0">Eggs</data>
  <data key="d1">Goslar</data>
  <data key="d2">Store_Kaufland</data>
  <data key="d3">3153</data>
  <data key="d6">0.0</data>
  <data key="d4">0.0</data>
</node>
<node id="1279">
  <data key="d0">Eggs</data>
  <data key="d1">Goslar</data>
  <data key="d2">Warehouse_KlaasKock</data>
  <data key="d3">3153</data>
  <data key="d6">0.0</data>
  <data key="d4">0.0</data>
</node>
<node id="1280">
  <data key="d0">Eggs</data>
  <data key="d1">Goslar</data>
  <data key="d2">Store_KlaasKock</data>
  <data key="d3">3153</data>
  <data key="d6">0.0</data>
  <data key="d4">0.0</data>
</node>
<node id="1281">
  <data key="d0">Eggs</data>
  <data key="d1">Goslar</data>
  <data key="d2">Warehouse_Lidl</data>
  <data key="d3">3153</data>
  <data key="d6">0.0</data>
  <data key="d4">0.0</data>
</node>
<node id="1282">
  <data key="d0">Eggs</data>
  <data key="d1">Goslar</data>
  <data key="d2">Store_Lidl</data>
  <data key="d3">3153</data>
  <data key="d6">85.34741444553443</data>
  <data key="d4">85.34741444553443</data>
</node>
<node id="1283">
  <data key="d0">Eggs</data>
  <data key="d1">Goslar</data>
  <data key="d2">Warehouse_Netto</data>
  <data key="d3">3153</data>
  <data key="d6">0.0</data>
  <data key="d4">0.0</data>
</node>
<node id="1284">
  <data key="d0">Eggs</data>
  <data key="d1">Goslar</data>
  <data key="d2">Store_Netto</data>
  <data key="d3">3153</data>
  <data key="d6">64.96778581526932</data>
  <data key="d4">64.96778581526932</data>
</node>
<node id="1285">
  <data key="d0">Eggs</data>
  <data key="d1">Goslar</data>
  <data key="d2">Warehouse_NettoNord</data>
  <data key="d3">3153</data>
  <data key="d6">0.0</data>
  <data key="d4">0.0</data>
</node>
<node id="1286">
  <data key="d0">Eggs</data>
  <data key="d1">Goslar</data>
  <data key="d2">Store_NettoNord</data>
  <data key="d3">3153</data>
  <data key="d6">0.0</data>
  <data key="d4">0.0</data>
</node>
<node id="1287">
  <data key="d0">Eggs</data>
  <data key="d1">Goslar</data>
  <data key="d2">Warehouse_Norma</data>
  <data key="d3">3153</data>
  <data key="d6">0.0</data>
  <data key="d4">0.0</data>
</node>
<node id="1288">
  <data key="d0">Eggs</data>
  <data key="d1">Goslar</data>
  <data key="d2">Store_Norma</data>
  <data key="d3">3153</data>
  <data key="d6">0.0</data>
  <data key="d4">0.0</data>
</node>
<node id="1289">
  <data key="d0">Eggs</data>
  <data key="d1">Goslar</data>
  <data key="d2">Warehouse_Penny</data>
  <data key="d3">3153</data>
  <data key="d6">0.0</data>
  <data key="d4">0.0</data>
</node>
<node id="1290">
  <data key="d0">Eggs</data>
  <data key="d1">Goslar</data>
  <data key="d2">Store_Penny</data>
  <data key="d3">3153</data>
  <data key="d6">123.72904836586702</data>
  <data key="d4">123.72904836586702</data>
</node>
<node id="1291">
  <data key="d0">Eggs</data>
  <data key="d1">Goslar</data>
  <data key="d2">Warehouse_Real</data>
  <data key="d3">3153</data>
  <data key="d6">0.0</data>
  <data key="d4">0.0</data>
</node>
<node id="1292">
  <data key="d0">Eggs</data>
  <data key="d1">Goslar</data>
  <data key="d2">Store_Real</data>
  <data key="d3">3153</data>
  <data key="d6">102.33043830408867</data>
  <data key="d4">102.33043830408867</data>
</node>
<node id="1293">
  <data key="d0">Eggs</data>
  <data key="d1">Goslar</data>
  <data key="d2">Warehouse_ReweHit</data>
  <data key="d3">3153</data>
  <data key="d6">0.0</data>
  <data key="d4">0.0</data>
</node>
<node id="1294">
  <data key="d0">Eggs</data>
  <data key="d1">Goslar</data>
  <data key="d2">Store_ReweHit</data>
  <data key="d3">3153</data>
  <data key="d6">166.0322168862658</data>
  <data key="d4">166.0322168862658</data>
</node>
<node id="1295">
  <data key="d0">Eggs</data>
  <data key="d1">Goslar</data>
  <data key="d2">Warehouse_Tegut</data>
  <data key="d3">3153</data>
  <data key="d6">0.0</data>
  <data key="d4">0.0</data>
</node>
<node id="1296">
  <data key="d0">Eggs</data>
  <data key="d1">Goslar</data>
  <data key="d2">Store_Tegut</data>
  <data key="d3">3153</data>
  <data key="d6">0.0</data>
  <data key="d4">0.0</data>
</node>
<node id="1297">
  <data key="d0">Eggs</data>
  <data key="d1">Goslar</data>
  <data key="d2">Warehouse_Wasgau</data>
  <data key="d3">3153</data>
  <data key="d6">0.0</data>
  <data key="d4">0.0</data>
</node>
<node id="1298">
  <data key="d0">Eggs</data>
  <data key="d1">Goslar</data>
  <data key="d2">Store_Wasgau</data>
  <data key="d3">3153</data>
  <data key="d6">0.0</data>
  <data key="d4">0.0</data>
</node>
<node id="1299">
  <data key="d0">Eggs</data>
  <data key="d1">Helmstedt</data>
  <data key="d2">Producer</data>
  <data key="d3">3154</data>
  <data key="d4">50.114226280162995</data>
</node>
<node id="1300">
  <data key="d0">Eggs</data>
  <data key="d1">Helmstedt</data>
  <data key="d2">Consumer</data>
  <data key="d3">3154</data>
  <data key="d5">843.0263664087361</data>
</node>
<node id="1301">
  <data key="d0">Eggs</data>
  <data key="d1">Helmstedt</data>
  <data key="d2">Wholesale</data>
  <data key="d3">3154</data>
  <data key="d6">139.09935045744146</data>
  <data key="d4">139.09935045744146</data>
</node>
<node id="1302">
  <data key="d0">Eggs</data>
  <data key="d1">Helmstedt</data>
  <data key="d2">Warehouse_AldiNord</data>
  <data key="d3">3154</data>
  <data key="d6">0.0</data>
  <data key="d4">0.0</data>
</node>
<node id="1303">
  <data key="d0">Eggs</data>
  <data key="d1">Helmstedt</data>
  <data key="d2">Store_AldiNord</data>
  <data key="d3">3154</data>
  <data key="d6">125.92343319109932</data>
  <data key="d4">125.92343319109932</data>
</node>
<node id="1304">
  <data key="d0">Eggs</data>
  <data key="d1">Helmstedt</data>
  <data key="d2">Warehouse_AldiSued</data>
  <data key="d3">3154</data>
  <data key="d6">0.0</data>
  <data key="d4">0.0</data>
</node>
<node id="1305">
  <data key="d0">Eggs</data>
  <data key="d1">Helmstedt</data>
  <data key="d2">Store_AldiSued</data>
  <data key="d3">3154</data>
  <data key="d6">0.0</data>
  <data key="d4">0.0</data>
</node>
<node id="1306">
  <data key="d0">Eggs</data>
  <data key="d1">Helmstedt</data>
  <data key="d2">Warehouse_Alnatura</data>
  <data key="d3">3154</data>
  <data key="d6">0.0</data>
  <data key="d4">0.0</data>
</node>
<node id="1307">
  <data key="d0">Eggs</data>
  <data key="d1">Helmstedt</data>
  <data key="d2">Store_Alnatura</data>
  <data key="d3">3154</data>
  <data key="d6">0.0</data>
  <data key="d4">0.0</data>
</node>
<node id="1308">
  <data key="d0">Eggs</data>
  <data key="d1">Helmstedt</data>
  <data key="d2">Warehouse_BartelsLangness</data>
  <data key="d3">3154</data>
  <data key="d6">0.0</data>
  <data key="d4">0.0</data>
</node>
<node id="1309">
  <data key="d0">Eggs</data>
  <data key="d1">Helmstedt</data>
  <data key="d2">Store_BartelsLangness</data>
  <data key="d3">3154</data>
  <data key="d6">0.0</data>
  <data key="d4">0.0</data>
</node>
<node id="1310">
  <data key="d0">Eggs</data>
  <data key="d1">Helmstedt</data>
  <data key="d2">Warehouse_Buenting</data>
  <data key="d3">3154</data>
  <data key="d6">0.0</data>
  <data key="d4">0.0</data>
</node>
<node id="1311">
  <data key="d0">Eggs</data>
  <data key="d1">Helmstedt</data>
  <data key="d2">Store_Buenting</data>
  <data key="d3">3154</data>
  <data key="d6">0.0</data>
  <data key="d4">0.0</data>
</node>
<node id="1312">
  <data key="d0">Eggs</data>
  <data key="d1">Helmstedt</data>
  <data key="d2">Warehouse_Coop</data>
  <data key="d3">3154</data>
  <data key="d6">0.0</data>
  <data key="d4">0.0</data>
</node>
<node id="1313">
  <data key="d0">Eggs</data>
  <data key="d1">Helmstedt</data>
  <data key="d2">Store_Coop</data>
  <data key="d3">3154</data>
  <data key="d6">0.0</data>
  <data key="d4">0.0</data>
</node>
<node id="1314">
  <data key="d0">Eggs</data>
  <data key="d1">Helmstedt</data>
  <data key="d2">Warehouse_Dennree</data>
  <data key="d3">3154</data>
  <data key="d6">0.0</data>
  <data key="d4">0.0</data>
</node>
<node id="1315">
  <data key="d0">Eggs</data>
  <data key="d1">Helmstedt</data>
  <data key="d2">Store_Dennree</data>
  <data key="d3">3154</data>
  <data key="d6">0.0</data>
  <data key="d4">0.0</data>
</node>
<node id="1316">
  <data key="d0">Eggs</data>
  <data key="d1">Helmstedt</data>
  <data key="d2">Warehouse_EdekaHessenring</data>
  <data key="d3">3154</data>
  <data key="d6">0.0</data>
  <data key="d4">0.0</data>
</node>
<node id="1317">
  <data key="d0">Eggs</data>
  <data key="d1">Helmstedt</data>
  <data key="d2">Store_EdekaHessenring</data>
  <data key="d3">3154</data>
  <data key="d6">0.0</data>
  <data key="d4">0.0</data>
</node>
<node id="1318">
  <data key="d0">Eggs</data>
  <data key="d1">Helmstedt</data>
  <data key="d2">Warehouse_EdekaMindenHannover</data>
  <data key="d3">3154</data>
  <data key="d6">0.0</data>
  <data key="d4">0.0</data>
</node>
<node id="1319">
  <data key="d0">Eggs</data>
  <data key="d1">Helmstedt</data>
  <data key="d2">Store_EdekaMindenHannover</data>
  <data key="d3">3154</data>
  <data key="d6">207.71918614774046</data>
  <data key="d4">207.71918614774046</data>
</node>
<node id="1320">
  <data key="d0">Eggs</data>
  <data key="d1">Helmstedt</data>
  <data key="d2">Warehouse_EdekaNord</data>
  <data key="d3">3154</data>
  <data key="d6">0.0</data>
  <data key="d4">0.0</data>
</node>
<node id="1321">
  <data key="d0">Eggs</data>
  <data key="d1">Helmstedt</data>
  <data key="d2">Store_EdekaNord</data>
  <data key="d3">3154</data>
  <data key="d6">0.0</data>
  <data key="d4">0.0</data>
</node>
<node id="1322">
  <data key="d0">Eggs</data>
  <data key="d1">Helmstedt</data>
  <data key="d2">Warehouse_EdekaNordbayern</data>
  <data key="d3">3154</data>
  <data key="d6">0.0</data>
  <data key="d4">0.0</data>
</node>
<node id="1323">
  <data key="d0">Eggs</data>
  <data key="d1">Helmstedt</data>
  <data key="d2">Store_EdekaNordbayern</data>
  <data key="d3">3154</data>
  <data key="d6">0.0</data>
  <data key="d4">0.0</data>
</node>
<node id="1324">
  <data key="d0">Eggs</data>
  <data key="d1">Helmstedt</data>
  <data key="d2">Warehouse_EdekaRheinRuhr</data>
  <data key="d3">3154</data>
  <data key="d6">0.0</data>
  <data key="d4">0.0</data>
</node>
<node id="1325">
  <data key="d0">Eggs</data>
  <data key="d1">Helmstedt</data>
  <data key="d2">Store_EdekaRheinRuhr</data>
  <data key="d3">3154</data>
  <data key="d6">0.0</data>
  <data key="d4">0.0</data>
</node>
<node id="1326">
  <data key="d0">Eggs</data>
  <data key="d1">Helmstedt</data>
  <data key="d2">Warehouse_EdekaSuedbayern</data>
  <data key="d3">3154</data>
  <data key="d6">0.0</data>
  <data key="d4">0.0</data>
</node>
<node id="1327">
  <data key="d0">Eggs</data>
  <data key="d1">Helmstedt</data>
  <data key="d2">Store_EdekaSuedbayern</data>
  <data key="d3">3154</data>
  <data key="d6">0.0</data>
  <data key="d4">0.0</data>
</node>
<node id="1328">
  <data key="d0">Eggs</data>
  <data key="d1">Helmstedt</data>
  <data key="d2">Warehouse_EdekaSuedwest</data>
  <data key="d3">3154</data>
  <data key="d6">0.0</data>
  <data key="d4">0.0</data>
</node>
<node id="1329">
  <data key="d0">Eggs</data>
  <data key="d1">Helmstedt</data>
  <data key="d2">Store_EdekaSuedwest</data>
  <data key="d3">3154</data>
  <data key="d6">0.0</data>
  <data key="d4">0.0</data>
</node>
<node id="1330">
  <data key="d0">Eggs</data>
  <data key="d1">Helmstedt</data>
  <data key="d2">Warehouse_Globus</data>
  <data key="d3">3154</data>
  <data key="d6">0.0</data>
  <data key="d4">0.0</data>
</node>
<node id="1331">
  <data key="d0">Eggs</data>
  <data key="d1">Helmstedt</data>
  <data key="d2">Store_Globus</data>
  <data key="d3">3154</data>
  <data key="d6">0.0</data>
  <data key="d4">0.0</data>
</node>
<node id="1332">
  <data key="d0">Eggs</data>
  <data key="d1">Helmstedt</data>
  <data key="d2">Warehouse_Kaes</data>
  <data key="d3">3154</data>
  <data key="d6">0.0</data>
  <data key="d4">0.0</data>
</node>
<node id="1333">
  <data key="d0">Eggs</data>
  <data key="d1">Helmstedt</data>
  <data key="d2">Store_Kaes</data>
  <data key="d3">3154</data>
  <data key="d6">0.0</data>
  <data key="d4">0.0</data>
</node>
<node id="1334">
  <data key="d0">Eggs</data>
  <data key="d1">Helmstedt</data>
  <data key="d2">Warehouse_KaisersTengelmann</data>
  <data key="d3">3154</data>
  <data key="d6">0.0</data>
  <data key="d4">0.0</data>
</node>
<node id="1335">
  <data key="d0">Eggs</data>
  <data key="d1">Helmstedt</data>
  <data key="d2">Store_KaisersTengelmann</data>
  <data key="d3">3154</data>
  <data key="d6">0.0</data>
  <data key="d4">0.0</data>
</node>
<node id="1336">
  <data key="d0">Eggs</data>
  <data key="d1">Helmstedt</data>
  <data key="d2">Warehouse_Kaufland</data>
  <data key="d3">3154</data>
  <data key="d6">0.0</data>
  <data key="d4">0.0</data>
</node>
<node id="1337">
  <data key="d0">Eggs</data>
  <data key="d1">Helmstedt</data>
  <data key="d2">Store_Kaufland</data>
  <data key="d3">3154</data>
  <data key="d6">54.05057129247125</data>
  <data key="d4">54.05057129247125</data>
</node>
<node id="1338">
  <data key="d0">Eggs</data>
  <data key="d1">Helmstedt</data>
  <data key="d2">Warehouse_KlaasKock</data>
  <data key="d3">3154</data>
  <data key="d6">0.0</data>
  <data key="d4">0.0</data>
</node>
<node id="1339">
  <data key="d0">Eggs</data>
  <data key="d1">Helmstedt</data>
  <data key="d2">Store_KlaasKock</data>
  <data key="d3">3154</data>
  <data key="d6">0.0</data>
  <data key="d4">0.0</data>
</node>
<node id="1340">
  <data key="d0">Eggs</data>
  <data key="d1">Helmstedt</data>
  <data key="d2">Warehouse_Lidl</data>
  <data key="d3">3154</data>
  <data key="d6">0.0</data>
  <data key="d4">0.0</data>
</node>
<node id="1341">
  <data key="d0">Eggs</data>
  <data key="d1">Helmstedt</data>
  <data key="d2">Store_Lidl</data>
  <data key="d3">3154</data>
  <data key="d6">86.0373024677134</data>
  <data key="d4">86.0373024677134</data>
</node>
<node id="1342">
  <data key="d0">Eggs</data>
  <data key="d1">Helmstedt</data>
  <data key="d2">Warehouse_Netto</data>
  <data key="d3">3154</data>
  <data key="d6">0.0</data>
  <data key="d4">0.0</data>
</node>
<node id="1343">
  <data key="d0">Eggs</data>
  <data key="d1">Helmstedt</data>
  <data key="d2">Store_Netto</data>
  <data key="d3">3154</data>
  <data key="d6">70.1606767748925</data>
  <data key="d4">70.1606767748925</data>
</node>
<node id="1344">
  <data key="d0">Eggs</data>
  <data key="d1">Helmstedt</data>
  <data key="d2">Warehouse_NettoNord</data>
  <data key="d3">3154</data>
  <data key="d6">0.0</data>
  <data key="d4">0.0</data>
</node>
<node id="1345">
  <data key="d0">Eggs</data>
  <data key="d1">Helmstedt</data>
  <data key="d2">Store_NettoNord</data>
  <data key="d3">3154</data>
  <data key="d6">0.0</data>
  <data key="d4">0.0</data>
</node>
<node id="1346">
  <data key="d0">Eggs</data>
  <data key="d1">Helmstedt</data>
  <data key="d2">Warehouse_Norma</data>
  <data key="d3">3154</data>
  <data key="d6">0.0</data>
  <data key="d4">0.0</data>
</node>
<node id="1347">
  <data key="d0">Eggs</data>
  <data key="d1">Helmstedt</data>
  <data key="d2">Store_Norma</data>
  <data key="d3">3154</data>
  <data key="d6">8.716578811744824</data>
  <data key="d4">8.716578811744824</data>
</node>
<node id="1348">
  <data key="d0">Eggs</data>
  <data key="d1">Helmstedt</data>
  <data key="d2">Warehouse_Penny</data>
  <data key="d3">3154</data>
  <data key="d6">0.0</data>
  <data key="d4">0.0</data>
</node>
<node id="1349">
  <data key="d0">Eggs</data>
  <data key="d1">Helmstedt</data>
  <data key="d2">Store_Penny</data>
  <data key="d3">3154</data>
  <data key="d6">64.98520810541899</data>
  <data key="d4">64.98520810541899</data>
</node>
<node id="1350">
  <data key="d0">Eggs</data>
  <data key="d1">Helmstedt</data>
  <data key="d2">Warehouse_Real</data>
  <data key="d3">3154</data>
  <data key="d6">0.0</data>
  <data key="d4">0.0</data>
</node>
<node id="1351">
  <data key="d0">Eggs</data>
  <data key="d1">Helmstedt</data>
  <data key="d2">Store_Real</data>
  <data key="d3">3154</data>
  <data key="d6">45.48964567379329</data>
  <data key="d4">45.48964567379329</data>
</node>
<node id="1352">
  <data key="d0">Eggs</data>
  <data key="d1">Helmstedt</data>
  <data key="d2">Warehouse_ReweHit</data>
  <data key="d3">3154</data>
  <data key="d6">0.0</data>
  <data key="d4">0.0</data>
</node>
<node id="1353">
  <data key="d0">Eggs</data>
  <data key="d1">Helmstedt</data>
  <data key="d2">Store_ReweHit</data>
  <data key="d3">3154</data>
  <data key="d6">26.850175804035395</data>
  <data key="d4">26.850175804035395</data>
</node>
<node id="1354">
  <data key="d0">Eggs</data>
  <data key="d1">Helmstedt</data>
  <data key="d2">Warehouse_Tegut</data>
  <data key="d3">3154</data>
  <data key="d6">0.0</data>
  <data key="d4">0.0</data>
</node>
<node id="1355">
  <data key="d0">Eggs</data>
  <data key="d1">Helmstedt</data>
  <data key="d2">Store_Tegut</data>
  <data key="d3">3154</data>
  <data key="d6">0.0</data>
  <data key="d4">0.0</data>
</node>
<node id="1356">
  <data key="d0">Eggs</data>
  <data key="d1">Helmstedt</data>
  <data key="d2">Warehouse_Wasgau</data>
  <data key="d3">3154</data>
  <data key="d6">0.0</data>
  <data key="d4">0.0</data>
</node>
<node id="1357">
  <data key="d0">Eggs</data>
  <data key="d1">Helmstedt</data>
  <data key="d2">Store_Wasgau</data>
  <data key="d3">3154</data>
  <data key="d6">0.0</data>
  <data key="d4">0.0</data>
</node>
<node id="1358">
  <data key="d0">Eggs</data>
  <data key="d1">Northeim</data>
  <data key="d2">Producer</data>
  <data key="d3">3155</data>
  <data key="d4">292.3525472222155</data>
</node>
<node id="1359">
  <data key="d0">Eggs</data>
  <data key="d1">Northeim</data>
  <data key="d2">Consumer</data>
  <data key="d3">3155</data>
  <data key="d5">1262.9680442338088</data>
</node>
<node id="1360">
  <data key="d0">Eggs</data>
  <data key="d1">Northeim</data>
  <data key="d2">Wholesale</data>
  <data key="d3">3155</data>
  <data key="d6">208.3897272985785</data>
  <data key="d4">208.3897272985785</data>
</node>
<node id="1361">
  <data key="d0">Eggs</data>
  <data key="d1">Northeim</data>
  <data key="d2">Warehouse_AldiNord</data>
  <data key="d3">3155</data>
  <data key="d6">0.0</data>
  <data key="d4">0.0</data>
</node>
<node id="1362">
  <data key="d0">Eggs</data>
  <data key="d1">Northeim</data>
  <data key="d2">Store_AldiNord</data>
  <data key="d3">3155</data>
  <data key="d6">176.66965869021266</data>
  <data key="d4">176.66965869021266</data>
</node>
<node id="1363">
  <data key="d0">Eggs</data>
  <data key="d1">Northeim</data>
  <data key="d2">Warehouse_AldiSued</data>
  <data key="d3">3155</data>
  <data key="d6">0.0</data>
  <data key="d4">0.0</data>
</node>
<node id="1364">
  <data key="d0">Eggs</data>
  <data key="d1">Northeim</data>
  <data key="d2">Store_AldiSued</data>
  <data key="d3">3155</data>
  <data key="d6">0.0</data>
  <data key="d4">0.0</data>
</node>
<node id="1365">
  <data key="d0">Eggs</data>
  <data key="d1">Northeim</data>
  <data key="d2">Warehouse_Alnatura</data>
  <data key="d3">3155</data>
  <data key="d6">0.0</data>
  <data key="d4">0.0</data>
</node>
<node id="1366">
  <data key="d0">Eggs</data>
  <data key="d1">Northeim</data>
  <data key="d2">Store_Alnatura</data>
  <data key="d3">3155</data>
  <data key="d6">0.0</data>
  <data key="d4">0.0</data>
</node>
<node id="1367">
  <data key="d0">Eggs</data>
  <data key="d1">Northeim</data>
  <data key="d2">Warehouse_BartelsLangness</data>
  <data key="d3">3155</data>
  <data key="d6">0.0</data>
  <data key="d4">0.0</data>
</node>
<node id="1368">
  <data key="d0">Eggs</data>
  <data key="d1">Northeim</data>
  <data key="d2">Store_BartelsLangness</data>
  <data key="d3">3155</data>
  <data key="d6">0.0</data>
  <data key="d4">0.0</data>
</node>
<node id="1369">
  <data key="d0">Eggs</data>
  <data key="d1">Northeim</data>
  <data key="d2">Warehouse_Buenting</data>
  <data key="d3">3155</data>
  <data key="d6">0.0</data>
  <data key="d4">0.0</data>
</node>
<node id="1370">
  <data key="d0">Eggs</data>
  <data key="d1">Northeim</data>
  <data key="d2">Store_Buenting</data>
  <data key="d3">3155</data>
  <data key="d6">2.2235709255012015</data>
  <data key="d4">2.2235709255012015</data>
</node>
<node id="1371">
  <data key="d0">Eggs</data>
  <data key="d1">Northeim</data>
  <data key="d2">Warehouse_Coop</data>
  <data key="d3">3155</data>
  <data key="d6">0.0</data>
  <data key="d4">0.0</data>
</node>
<node id="1372">
  <data key="d0">Eggs</data>
  <data key="d1">Northeim</data>
  <data key="d2">Store_Coop</data>
  <data key="d3">3155</data>
  <data key="d6">0.0</data>
  <data key="d4">0.0</data>
</node>
<node id="1373">
  <data key="d0">Eggs</data>
  <data key="d1">Northeim</data>
  <data key="d2">Warehouse_Dennree</data>
  <data key="d3">3155</data>
  <data key="d6">0.0</data>
  <data key="d4">0.0</data>
</node>
<node id="1374">
  <data key="d0">Eggs</data>
  <data key="d1">Northeim</data>
  <data key="d2">Store_Dennree</data>
  <data key="d3">3155</data>
  <data key="d6">0.0</data>
  <data key="d4">0.0</data>
</node>
<node id="1375">
  <data key="d0">Eggs</data>
  <data key="d1">Northeim</data>
  <data key="d2">Warehouse_EdekaHessenring</data>
  <data key="d3">3155</data>
  <data key="d6">0.0</data>
  <data key="d4">0.0</data>
</node>
<node id="1376">
  <data key="d0">Eggs</data>
  <data key="d1">Northeim</data>
  <data key="d2">Store_EdekaHessenring</data>
  <data key="d3">3155</data>
  <data key="d6">183.8962641980916</data>
  <data key="d4">183.8962641980916</data>
</node>
<node id="1377">
  <data key="d0">Eggs</data>
  <data key="d1">Northeim</data>
  <data key="d2">Warehouse_EdekaMindenHannover</data>
  <data key="d3">3155</data>
  <data key="d6">0.0</data>
  <data key="d4">0.0</data>
</node>
<node id="1378">
  <data key="d0">Eggs</data>
  <data key="d1">Northeim</data>
  <data key="d2">Store_EdekaMindenHannover</data>
  <data key="d3">3155</data>
  <data key="d6">31.790115575524993</data>
  <data key="d4">31.790115575524993</data>
</node>
<node id="1379">
  <data key="d0">Eggs</data>
  <data key="d1">Northeim</data>
  <data key="d2">Warehouse_EdekaNord</data>
  <data key="d3">3155</data>
  <data key="d6">0.0</data>
  <data key="d4">0.0</data>
</node>
<node id="1380">
  <data key="d0">Eggs</data>
  <data key="d1">Northeim</data>
  <data key="d2">Store_EdekaNord</data>
  <data key="d3">3155</data>
  <data key="d6">0.0</data>
  <data key="d4">0.0</data>
</node>
<node id="1381">
  <data key="d0">Eggs</data>
  <data key="d1">Northeim</data>
  <data key="d2">Warehouse_EdekaNordbayern</data>
  <data key="d3">3155</data>
  <data key="d6">0.0</data>
  <data key="d4">0.0</data>
</node>
<node id="1382">
  <data key="d0">Eggs</data>
  <data key="d1">Northeim</data>
  <data key="d2">Store_EdekaNordbayern</data>
  <data key="d3">3155</data>
  <data key="d6">0.0</data>
  <data key="d4">0.0</data>
</node>
<node id="1383">
  <data key="d0">Eggs</data>
  <data key="d1">Northeim</data>
  <data key="d2">Warehouse_EdekaRheinRuhr</data>
  <data key="d3">3155</data>
  <data key="d6">0.0</data>
  <data key="d4">0.0</data>
</node>
<node id="1384">
  <data key="d0">Eggs</data>
  <data key="d1">Northeim</data>
  <data key="d2">Store_EdekaRheinRuhr</data>
  <data key="d3">3155</data>
  <data key="d6">0.0</data>
  <data key="d4">0.0</data>
</node>
<node id="1385">
  <data key="d0">Eggs</data>
  <data key="d1">Northeim</data>
  <data key="d2">Warehouse_EdekaSuedbayern</data>
  <data key="d3">3155</data>
  <data key="d6">0.0</data>
  <data key="d4">0.0</data>
</node>
<node id="1386">
  <data key="d0">Eggs</data>
  <data key="d1">Northeim</data>
  <data key="d2">Store_EdekaSuedbayern</data>
  <data key="d3">3155</data>
  <data key="d6">0.0</data>
  <data key="d4">0.0</data>
</node>
<node id="1387">
  <data key="d0">Eggs</data>
  <data key="d1">Northeim</data>
  <data key="d2">Warehouse_EdekaSuedwest</data>
  <data key="d3">3155</data>
  <data key="d6">0.0</data>
  <data key="d4">0.0</data>
</node>
<node id="1388">
  <data key="d0">Eggs</data>
  <data key="d1">Northeim</data>
  <data key="d2">Store_EdekaSuedwest</data>
  <data key="d3">3155</data>
  <data key="d6">0.0</data>
  <data key="d4">0.0</data>
</node>
<node id="1389">
  <data key="d0">Eggs</data>
  <data key="d1">Northeim</data>
  <data key="d2">Warehouse_Globus</data>
  <data key="d3">3155</data>
  <data key="d6">0.0</data>
  <data key="d4">0.0</data>
</node>
<node id="1390">
  <data key="d0">Eggs</data>
  <data key="d1">Northeim</data>
  <data key="d2">Store_Globus</data>
  <data key="d3">3155</data>
  <data key="d6">0.0</data>
  <data key="d4">0.0</data>
</node>
<node id="1391">
  <data key="d0">Eggs</data>
  <data key="d1">Northeim</data>
  <data key="d2">Warehouse_Kaes</data>
  <data key="d3">3155</data>
  <data key="d6">0.0</data>
  <data key="d4">0.0</data>
</node>
<node id="1392">
  <data key="d0">Eggs</data>
  <data key="d1">Northeim</data>
  <data key="d2">Store_Kaes</data>
  <data key="d3">3155</data>
  <data key="d6">0.0</data>
  <data key="d4">0.0</data>
</node>
<node id="1393">
  <data key="d0">Eggs</data>
  <data key="d1">Northeim</data>
  <data key="d2">Warehouse_KaisersTengelmann</data>
  <data key="d3">3155</data>
  <data key="d6">0.0</data>
  <data key="d4">0.0</data>
</node>
<node id="1394">
  <data key="d0">Eggs</data>
  <data key="d1">Northeim</data>
  <data key="d2">Store_KaisersTengelmann</data>
  <data key="d3">3155</data>
  <data key="d6">0.0</data>
  <data key="d4">0.0</data>
</node>
<node id="1395">
  <data key="d0">Eggs</data>
  <data key="d1">Northeim</data>
  <data key="d2">Warehouse_Kaufland</data>
  <data key="d3">3155</data>
  <data key="d6">0.0</data>
  <data key="d4">0.0</data>
</node>
<node id="1396">
  <data key="d0">Eggs</data>
  <data key="d1">Northeim</data>
  <data key="d2">Store_Kaufland</data>
  <data key="d3">3155</data>
  <data key="d6">96.48213218932558</data>
  <data key="d4">96.48213218932558</data>
</node>
<node id="1397">
  <data key="d0">Eggs</data>
  <data key="d1">Northeim</data>
  <data key="d2">Warehouse_KlaasKock</data>
  <data key="d3">3155</data>
  <data key="d6">0.0</data>
  <data key="d4">0.0</data>
</node>
<node id="1398">
  <data key="d0">Eggs</data>
  <data key="d1">Northeim</data>
  <data key="d2">Store_KlaasKock</data>
  <data key="d3">3155</data>
  <data key="d6">0.0</data>
  <data key="d4">0.0</data>
</node>
<node id="1399">
  <data key="d0">Eggs</data>
  <data key="d1">Northeim</data>
  <data key="d2">Warehouse_Lidl</data>
  <data key="d3">3155</data>
  <data key="d6">0.0</data>
  <data key="d4">0.0</data>
</node>
<node id="1400">
  <data key="d0">Eggs</data>
  <data key="d1">Northeim</data>
  <data key="d2">Store_Lidl</data>
  <data key="d3">3155</data>
  <data key="d6">115.24351187324197</data>
  <data key="d4">115.24351187324197</data>
</node>
<node id="1401">
  <data key="d0">Eggs</data>
  <data key="d1">Northeim</data>
  <data key="d2">Warehouse_Netto</data>
  <data key="d3">3155</data>
  <data key="d6">0.0</data>
  <data key="d4">0.0</data>
</node>
<node id="1402">
  <data key="d0">Eggs</data>
  <data key="d1">Northeim</data>
  <data key="d2">Store_Netto</data>
  <data key="d3">3155</data>
  <data key="d6">83.55762618484984</data>
  <data key="d4">83.55762618484984</data>
</node>
<node id="1403">
  <data key="d0">Eggs</data>
  <data key="d1">Northeim</data>
  <data key="d2">Warehouse_NettoNord</data>
  <data key="d3">3155</data>
  <data key="d6">0.0</data>
  <data key="d4">0.0</data>
</node>
<node id="1404">
  <data key="d0">Eggs</data>
  <data key="d1">Northeim</data>
  <data key="d2">Store_NettoNord</data>
  <data key="d3">3155</data>
  <data key="d6">0.0</data>
  <data key="d4">0.0</data>
</node>
<node id="1405">
  <data key="d0">Eggs</data>
  <data key="d1">Northeim</data>
  <data key="d2">Warehouse_Norma</data>
  <data key="d3">3155</data>
  <data key="d6">0.0</data>
  <data key="d4">0.0</data>
</node>
<node id="1406">
  <data key="d0">Eggs</data>
  <data key="d1">Northeim</data>
  <data key="d2">Store_Norma</data>
  <data key="d3">3155</data>
  <data key="d6">0.0</data>
  <data key="d4">0.0</data>
</node>
<node id="1407">
  <data key="d0">Eggs</data>
  <data key="d1">Northeim</data>
  <data key="d2">Warehouse_Penny</data>
  <data key="d3">3155</data>
  <data key="d6">0.0</data>
  <data key="d4">0.0</data>
</node>
<node id="1408">
  <data key="d0">Eggs</data>
  <data key="d1">Northeim</data>
  <data key="d2">Store_Penny</data>
  <data key="d3">3155</data>
  <data key="d6">58.02130383729698</data>
  <data key="d4">58.02130383729698</data>
</node>
<node id="1409">
  <data key="d0">Eggs</data>
  <data key="d1">Northeim</data>
  <data key="d2">Warehouse_Real</data>
  <data key="d3">3155</data>
  <data key="d6">0.0</data>
  <data key="d4">0.0</data>
</node>
<node id="1410">
  <data key="d0">Eggs</data>
  <data key="d1">Northeim</data>
  <data key="d2">Store_Real</data>
  <data key="d3">3155</data>
  <data key="d6">0.0</data>
  <data key="d4">0.0</data>
</node>
<node id="1411">
  <data key="d0">Eggs</data>
  <data key="d1">Northeim</data>
  <data key="d2">Warehouse_ReweHit</data>
  <data key="d3">3155</data>
  <data key="d6">0.0</data>
  <data key="d4">0.0</data>
</node>
<node id="1412">
  <data key="d0">Eggs</data>
  <data key="d1">Northeim</data>
  <data key="d2">Store_ReweHit</data>
  <data key="d3">3155</data>
  <data key="d6">285.7288639269044</data>
  <data key="d4">285.7288639269044</data>
</node>
<node id="1413">
  <data key="d0">Eggs</data>
  <data key="d1">Northeim</data>
  <data key="d2">Warehouse_Tegut</data>
  <data key="d3">3155</data>
  <data key="d6">0.0</data>
  <data key="d4">0.0</data>
</node>
<node id="1414">
  <data key="d0">Eggs</data>
  <data key="d1">Northeim</data>
  <data key="d2">Store_Tegut</data>
  <data key="d3">3155</data>
  <data key="d6">0.0</data>
  <data key="d4">0.0</data>
</node>
<node id="1415">
  <data key="d0">Eggs</data>
  <data key="d1">Northeim</data>
  <data key="d2">Warehouse_Wasgau</data>
  <data key="d3">3155</data>
  <data key="d6">0.0</data>
  <data key="d4">0.0</data>
</node>
<node id="1416">
  <data key="d0">Eggs</data>
  <data key="d1">Northeim</data>
  <data key="d2">Store_Wasgau</data>
  <data key="d3">3155</data>
  <data key="d6">0.0</data>
  <data key="d4">0.0</data>
</node>
<node id="1417">
  <data key="d0">Eggs</data>
  <data key="d1">Osterode am Harz</data>
  <data key="d2">Producer</data>
  <data key="d3">3156</data>
  <data key="d4">33.99630182471635</data>
</node>
<node id="1418">
  <data key="d0">Eggs</data>
  <data key="d1">Osterode am Harz</data>
  <data key="d2">Consumer</data>
  <data key="d3">3156</data>
  <data key="d5">701.7680846591513</data>
</node>
<node id="1419">
  <data key="d0">Eggs</data>
  <data key="d1">Osterode am Harz</data>
  <data key="d2">Wholesale</data>
  <data key="d3">3156</data>
  <data key="d6">115.79173396875997</data>
  <data key="d4">115.79173396875997</data>
</node>
<node id="1420">
  <data key="d0">Eggs</data>
  <data key="d1">Osterode am Harz</data>
  <data key="d2">Warehouse_AldiNord</data>
  <data key="d3">3156</data>
  <data key="d6">0.0</data>
  <data key="d4">0.0</data>
</node>
<node id="1421">
  <data key="d0">Eggs</data>
  <data key="d1">Osterode am Harz</data>
  <data key="d2">Store_AldiNord</data>
  <data key="d3">3156</data>
  <data key="d6">94.07635661916309</data>
  <data key="d4">94.07635661916309</data>
</node>
<node id="1422">
  <data key="d0">Eggs</data>
  <data key="d1">Osterode am Harz</data>
  <data key="d2">Warehouse_AldiSued</data>
  <data key="d3">3156</data>
  <data key="d6">0.0</data>
  <data key="d4">0.0</data>
</node>
<node id="1423">
  <data key="d0">Eggs</data>
  <data key="d1">Osterode am Harz</data>
  <data key="d2">Store_AldiSued</data>
  <data key="d3">3156</data>
  <data key="d6">0.0</data>
  <data key="d4">0.0</data>
</node>
<node id="1424">
  <data key="d0">Eggs</data>
  <data key="d1">Osterode am Harz</data>
  <data key="d2">Warehouse_Alnatura</data>
  <data key="d3">3156</data>
  <data key="d6">0.0</data>
  <data key="d4">0.0</data>
</node>
<node id="1425">
  <data key="d0">Eggs</data>
  <data key="d1">Osterode am Harz</data>
  <data key="d2">Store_Alnatura</data>
  <data key="d3">3156</data>
  <data key="d6">0.0</data>
  <data key="d4">0.0</data>
</node>
<node id="1426">
  <data key="d0">Eggs</data>
  <data key="d1">Osterode am Harz</data>
  <data key="d2">Warehouse_BartelsLangness</data>
  <data key="d3">3156</data>
  <data key="d6">0.0</data>
  <data key="d4">0.0</data>
</node>
<node id="1427">
  <data key="d0">Eggs</data>
  <data key="d1">Osterode am Harz</data>
  <data key="d2">Store_BartelsLangness</data>
  <data key="d3">3156</data>
  <data key="d6">0.0</data>
  <data key="d4">0.0</data>
</node>
<node id="1428">
  <data key="d0">Eggs</data>
  <data key="d1">Osterode am Harz</data>
  <data key="d2">Warehouse_Buenting</data>
  <data key="d3">3156</data>
  <data key="d6">0.0</data>
  <data key="d4">0.0</data>
</node>
<node id="1429">
  <data key="d0">Eggs</data>
  <data key="d1">Osterode am Harz</data>
  <data key="d2">Store_Buenting</data>
  <data key="d3">3156</data>
  <data key="d6">0.0</data>
  <data key="d4">0.0</data>
</node>
<node id="1430">
  <data key="d0">Eggs</data>
  <data key="d1">Osterode am Harz</data>
  <data key="d2">Warehouse_Coop</data>
  <data key="d3">3156</data>
  <data key="d6">0.0</data>
  <data key="d4">0.0</data>
</node>
<node id="1431">
  <data key="d0">Eggs</data>
  <data key="d1">Osterode am Harz</data>
  <data key="d2">Store_Coop</data>
  <data key="d3">3156</data>
  <data key="d6">0.0</data>
  <data key="d4">0.0</data>
</node>
<node id="1432">
  <data key="d0">Eggs</data>
  <data key="d1">Osterode am Harz</data>
  <data key="d2">Warehouse_Dennree</data>
  <data key="d3">3156</data>
  <data key="d6">0.0</data>
  <data key="d4">0.0</data>
</node>
<node id="1433">
  <data key="d0">Eggs</data>
  <data key="d1">Osterode am Harz</data>
  <data key="d2">Store_Dennree</data>
  <data key="d3">3156</data>
  <data key="d6">0.0</data>
  <data key="d4">0.0</data>
</node>
<node id="1434">
  <data key="d0">Eggs</data>
  <data key="d1">Osterode am Harz</data>
  <data key="d2">Warehouse_EdekaHessenring</data>
  <data key="d3">3156</data>
  <data key="d6">0.0</data>
  <data key="d4">0.0</data>
</node>
<node id="1435">
  <data key="d0">Eggs</data>
  <data key="d1">Osterode am Harz</data>
  <data key="d2">Store_EdekaHessenring</data>
  <data key="d3">3156</data>
  <data key="d6">166.04103893562456</data>
  <data key="d4">166.04103893562456</data>
</node>
<node id="1436">
  <data key="d0">Eggs</data>
  <data key="d1">Osterode am Harz</data>
  <data key="d2">Warehouse_EdekaMindenHannover</data>
  <data key="d3">3156</data>
  <data key="d6">0.0</data>
  <data key="d4">0.0</data>
</node>
<node id="1437">
  <data key="d0">Eggs</data>
  <data key="d1">Osterode am Harz</data>
  <data key="d2">Store_EdekaMindenHannover</data>
  <data key="d3">3156</data>
  <data key="d6">0.0</data>
  <data key="d4">0.0</data>
</node>
<node id="1438">
  <data key="d0">Eggs</data>
  <data key="d1">Osterode am Harz</data>
  <data key="d2">Warehouse_EdekaNord</data>
  <data key="d3">3156</data>
  <data key="d6">0.0</data>
  <data key="d4">0.0</data>
</node>
<node id="1439">
  <data key="d0">Eggs</data>
  <data key="d1">Osterode am Harz</data>
  <data key="d2">Store_EdekaNord</data>
  <data key="d3">3156</data>
  <data key="d6">0.0</data>
  <data key="d4">0.0</data>
</node>
<node id="1440">
  <data key="d0">Eggs</data>
  <data key="d1">Osterode am Harz</data>
  <data key="d2">Warehouse_EdekaNordbayern</data>
  <data key="d3">3156</data>
  <data key="d6">0.0</data>
  <data key="d4">0.0</data>
</node>
<node id="1441">
  <data key="d0">Eggs</data>
  <data key="d1">Osterode am Harz</data>
  <data key="d2">Store_EdekaNordbayern</data>
  <data key="d3">3156</data>
  <data key="d6">0.0</data>
  <data key="d4">0.0</data>
</node>
<node id="1442">
  <data key="d0">Eggs</data>
  <data key="d1">Osterode am Harz</data>
  <data key="d2">Warehouse_EdekaRheinRuhr</data>
  <data key="d3">3156</data>
  <data key="d6">0.0</data>
  <data key="d4">0.0</data>
</node>
<node id="1443">
  <data key="d0">Eggs</data>
  <data key="d1">Osterode am Harz</data>
  <data key="d2">Store_EdekaRheinRuhr</data>
  <data key="d3">3156</data>
  <data key="d6">0.0</data>
  <data key="d4">0.0</data>
</node>
<node id="1444">
  <data key="d0">Eggs</data>
  <data key="d1">Osterode am Harz</data>
  <data key="d2">Warehouse_EdekaSuedbayern</data>
  <data key="d3">3156</data>
  <data key="d6">0.0</data>
  <data key="d4">0.0</data>
</node>
<node id="1445">
  <data key="d0">Eggs</data>
  <data key="d1">Osterode am Harz</data>
  <data key="d2">Store_EdekaSuedbayern</data>
  <data key="d3">3156</data>
  <data key="d6">0.0</data>
  <data key="d4">0.0</data>
</node>
<node id="1446">
  <data key="d0">Eggs</data>
  <data key="d1">Osterode am Harz</data>
  <data key="d2">Warehouse_EdekaSuedwest</data>
  <data key="d3">3156</data>
  <data key="d6">0.0</data>
  <data key="d4">0.0</data>
</node>
<node id="1447">
  <data key="d0">Eggs</data>
  <data key="d1">Osterode am Harz</data>
  <data key="d2">Store_EdekaSuedwest</data>
  <data key="d3">3156</data>
  <data key="d6">0.0</data>
  <data key="d4">0.0</data>
</node>
<node id="1448">
  <data key="d0">Eggs</data>
  <data key="d1">Osterode am Harz</data>
  <data key="d2">Warehouse_Globus</data>
  <data key="d3">3156</data>
  <data key="d6">0.0</data>
  <data key="d4">0.0</data>
</node>
<node id="1449">
  <data key="d0">Eggs</data>
  <data key="d1">Osterode am Harz</data>
  <data key="d2">Store_Globus</data>
  <data key="d3">3156</data>
  <data key="d6">0.0</data>
  <data key="d4">0.0</data>
</node>
<node id="1450">
  <data key="d0">Eggs</data>
  <data key="d1">Osterode am Harz</data>
  <data key="d2">Warehouse_Kaes</data>
  <data key="d3">3156</data>
  <data key="d6">0.0</data>
  <data key="d4">0.0</data>
</node>
<node id="1451">
  <data key="d0">Eggs</data>
  <data key="d1">Osterode am Harz</data>
  <data key="d2">Store_Kaes</data>
  <data key="d3">3156</data>
  <data key="d6">0.0</data>
  <data key="d4">0.0</data>
</node>
<node id="1452">
  <data key="d0">Eggs</data>
  <data key="d1">Osterode am Harz</data>
  <data key="d2">Warehouse_KaisersTengelmann</data>
  <data key="d3">3156</data>
  <data key="d6">0.0</data>
  <data key="d4">0.0</data>
</node>
<node id="1453">
  <data key="d0">Eggs</data>
  <data key="d1">Osterode am Harz</data>
  <data key="d2">Store_KaisersTengelmann</data>
  <data key="d3">3156</data>
  <data key="d6">0.0</data>
  <data key="d4">0.0</data>
</node>
<node id="1454">
  <data key="d0">Eggs</data>
  <data key="d1">Osterode am Harz</data>
  <data key="d2">Warehouse_Kaufland</data>
  <data key="d3">3156</data>
  <data key="d6">0.0</data>
  <data key="d4">0.0</data>
</node>
<node id="1455">
  <data key="d0">Eggs</data>
  <data key="d1">Osterode am Harz</data>
  <data key="d2">Store_Kaufland</data>
  <data key="d3">3156</data>
  <data key="d6">47.106005531368986</data>
  <data key="d4">47.106005531368986</data>
</node>
<node id="1456">
  <data key="d0">Eggs</data>
  <data key="d1">Osterode am Harz</data>
  <data key="d2">Warehouse_KlaasKock</data>
  <data key="d3">3156</data>
  <data key="d6">0.0</data>
  <data key="d4">0.0</data>
</node>
<node id="1457">
  <data key="d0">Eggs</data>
  <data key="d1">Osterode am Harz</data>
  <data key="d2">Store_KlaasKock</data>
  <data key="d3">3156</data>
  <data key="d6">0.0</data>
  <data key="d4">0.0</data>
</node>
<node id="1458">
  <data key="d0">Eggs</data>
  <data key="d1">Osterode am Harz</data>
  <data key="d2">Warehouse_Lidl</data>
  <data key="d3">3156</data>
  <data key="d6">0.0</data>
  <data key="d4">0.0</data>
</node>
<node id="1459">
  <data key="d0">Eggs</data>
  <data key="d1">Osterode am Harz</data>
  <data key="d2">Store_Lidl</data>
  <data key="d3">3156</data>
  <data key="d6">56.228766861778084</data>
  <data key="d4">56.228766861778084</data>
</node>
<node id="1460">
  <data key="d0">Eggs</data>
  <data key="d1">Osterode am Harz</data>
  <data key="d2">Warehouse_Netto</data>
  <data key="d3">3156</data>
  <data key="d6">0.0</data>
  <data key="d4">0.0</data>
</node>
<node id="1461">
  <data key="d0">Eggs</data>
  <data key="d1">Osterode am Harz</data>
  <data key="d2">Store_Netto</data>
  <data key="d3">3156</data>
  <data key="d6">30.59007702613018</data>
  <data key="d4">30.59007702613018</data>
</node>
<node id="1462">
  <data key="d0">Eggs</data>
  <data key="d1">Osterode am Harz</data>
  <data key="d2">Warehouse_NettoNord</data>
  <data key="d3">3156</data>
  <data key="d6">0.0</data>
  <data key="d4">0.0</data>
</node>
<node id="1463">
  <data key="d0">Eggs</data>
  <data key="d1">Osterode am Harz</data>
  <data key="d2">Store_NettoNord</data>
  <data key="d3">3156</data>
  <data key="d6">0.0</data>
  <data key="d4">0.0</data>
</node>
<node id="1464">
  <data key="d0">Eggs</data>
  <data key="d1">Osterode am Harz</data>
  <data key="d2">Warehouse_Norma</data>
  <data key="d3">3156</data>
  <data key="d6">0.0</data>
  <data key="d4">0.0</data>
</node>
<node id="1465">
  <data key="d0">Eggs</data>
  <data key="d1">Osterode am Harz</data>
  <data key="d2">Store_Norma</data>
  <data key="d3">3156</data>
  <data key="d6">7.596648840191975</data>
  <data key="d4">7.596648840191975</data>
</node>
<node id="1466">
  <data key="d0">Eggs</data>
  <data key="d1">Osterode am Harz</data>
  <data key="d2">Warehouse_Penny</data>
  <data key="d3">3156</data>
  <data key="d6">0.0</data>
  <data key="d4">0.0</data>
</node>
<node id="1467">
  <data key="d0">Eggs</data>
  <data key="d1">Osterode am Harz</data>
  <data key="d2">Store_Penny</data>
  <data key="d3">3156</data>
  <data key="d6">45.308584154002126</data>
  <data key="d4">45.308584154002126</data>
</node>
<node id="1468">
  <data key="d0">Eggs</data>
  <data key="d1">Osterode am Harz</data>
  <data key="d2">Warehouse_Real</data>
  <data key="d3">3156</data>
  <data key="d6">0.0</data>
  <data key="d4">0.0</data>
</node>
<node id="1469">
  <data key="d0">Eggs</data>
  <data key="d1">Osterode am Harz</data>
  <data key="d2">Store_Real</data>
  <data key="d3">3156</data>
  <data key="d6">0.0</data>
  <data key="d4">0.0</data>
</node>
<node id="1470">
  <data key="d0">Eggs</data>
  <data key="d1">Osterode am Harz</data>
  <data key="d2">Warehouse_ReweHit</data>
  <data key="d3">3156</data>
  <data key="d6">0.0</data>
  <data key="d4">0.0</data>
</node>
<node id="1471">
  <data key="d0">Eggs</data>
  <data key="d1">Osterode am Harz</data>
  <data key="d2">Store_ReweHit</data>
  <data key="d3">3156</data>
  <data key="d6">125.34470586316756</data>
  <data key="d4">125.34470586316756</data>
</node>
<node id="1472">
  <data key="d0">Eggs</data>
  <data key="d1">Osterode am Harz</data>
  <data key="d2">Warehouse_Tegut</data>
  <data key="d3">3156</data>
  <data key="d6">0.0</data>
  <data key="d4">0.0</data>
</node>
<node id="1473">
  <data key="d0">Eggs</data>
  <data key="d1">Osterode am Harz</data>
  <data key="d2">Store_Tegut</data>
  <data key="d3">3156</data>
  <data key="d6">2.0348166536228502</data>
  <data key="d4">2.0348166536228502</data>
</node>
<node id="1474">
  <data key="d0">Eggs</data>
  <data key="d1">Osterode am Harz</data>
  <data key="d2">Warehouse_Wasgau</data>
  <data key="d3">3156</data>
  <data key="d6">0.0</data>
  <data key="d4">0.0</data>
</node>
<node id="1475">
  <data key="d0">Eggs</data>
  <data key="d1">Osterode am Harz</data>
  <data key="d2">Store_Wasgau</data>
  <data key="d3">3156</data>
  <data key="d6">0.0</data>
  <data key="d4">0.0</data>
</node>
<node id="1476">
  <data key="d0">Eggs</data>
  <data key="d1">Peine</data>
  <data key="d2">Producer</data>
  <data key="d3">3157</data>
  <data key="d4">234.35540400571148</data>
</node>
<node id="1477">
  <data key="d0">Eggs</data>
  <data key="d1">Peine</data>
  <data key="d2">Consumer</data>
  <data key="d3">3157</data>
  <data key="d5">1212.875727366186</data>
</node>
<node id="1478">
  <data key="d0">Eggs</data>
  <data key="d1">Peine</data>
  <data key="d2">Wholesale</data>
  <data key="d3">3157</data>
  <data key="d6">200.12449501542068</data>
  <data key="d4">200.12449501542068</data>
</node>
<node id="1479">
  <data key="d0">Eggs</data>
  <data key="d1">Peine</data>
  <data key="d2">Warehouse_AldiNord</data>
  <data key="d3">3157</data>
  <data key="d6">0.0</data>
  <data key="d4">0.0</data>
</node>
<node id="1480">
  <data key="d0">Eggs</data>
  <data key="d1">Peine</data>
  <data key="d2">Store_AldiNord</data>
  <data key="d3">3157</data>
  <data key="d6">153.66201859613304</data>
  <data key="d4">153.66201859613304</data>
</node>
<node id="1481">
  <data key="d0">Eggs</data>
  <data key="d1">Peine</data>
  <data key="d2">Warehouse_AldiSued</data>
  <data key="d3">3157</data>
  <data key="d6">0.0</data>
  <data key="d4">0.0</data>
</node>
<node id="1482">
  <data key="d0">Eggs</data>
  <data key="d1">Peine</data>
  <data key="d2">Store_AldiSued</data>
  <data key="d3">3157</data>
  <data key="d6">0.0</data>
  <data key="d4">0.0</data>
</node>
<node id="1483">
  <data key="d0">Eggs</data>
  <data key="d1">Peine</data>
  <data key="d2">Warehouse_Alnatura</data>
  <data key="d3">3157</data>
  <data key="d6">0.0</data>
  <data key="d4">0.0</data>
</node>
<node id="1484">
  <data key="d0">Eggs</data>
  <data key="d1">Peine</data>
  <data key="d2">Store_Alnatura</data>
  <data key="d3">3157</data>
  <data key="d6">0.0</data>
  <data key="d4">0.0</data>
</node>
<node id="1485">
  <data key="d0">Eggs</data>
  <data key="d1">Peine</data>
  <data key="d2">Warehouse_BartelsLangness</data>
  <data key="d3">3157</data>
  <data key="d6">0.0</data>
  <data key="d4">0.0</data>
</node>
<node id="1486">
  <data key="d0">Eggs</data>
  <data key="d1">Peine</data>
  <data key="d2">Store_BartelsLangness</data>
  <data key="d3">3157</data>
  <data key="d6">0.0</data>
  <data key="d4">0.0</data>
</node>
<node id="1487">
  <data key="d0">Eggs</data>
  <data key="d1">Peine</data>
  <data key="d2">Warehouse_Buenting</data>
  <data key="d3">3157</data>
  <data key="d6">0.0</data>
  <data key="d4">0.0</data>
</node>
<node id="1488">
  <data key="d0">Eggs</data>
  <data key="d1">Peine</data>
  <data key="d2">Store_Buenting</data>
  <data key="d3">3157</data>
  <data key="d6">0.0</data>
  <data key="d4">0.0</data>
</node>
<node id="1489">
  <data key="d0">Eggs</data>
  <data key="d1">Peine</data>
  <data key="d2">Warehouse_Coop</data>
  <data key="d3">3157</data>
  <data key="d6">0.0</data>
  <data key="d4">0.0</data>
</node>
<node id="1490">
  <data key="d0">Eggs</data>
  <data key="d1">Peine</data>
  <data key="d2">Store_Coop</data>
  <data key="d3">3157</data>
  <data key="d6">0.0</data>
  <data key="d4">0.0</data>
</node>
<node id="1491">
  <data key="d0">Eggs</data>
  <data key="d1">Peine</data>
  <data key="d2">Warehouse_Dennree</data>
  <data key="d3">3157</data>
  <data key="d6">0.0</data>
  <data key="d4">0.0</data>
</node>
<node id="1492">
  <data key="d0">Eggs</data>
  <data key="d1">Peine</data>
  <data key="d2">Store_Dennree</data>
  <data key="d3">3157</data>
  <data key="d6">0.0</data>
  <data key="d4">0.0</data>
</node>
<node id="1493">
  <data key="d0">Eggs</data>
  <data key="d1">Peine</data>
  <data key="d2">Warehouse_EdekaHessenring</data>
  <data key="d3">3157</data>
  <data key="d6">0.0</data>
  <data key="d4">0.0</data>
</node>
<node id="1494">
  <data key="d0">Eggs</data>
  <data key="d1">Peine</data>
  <data key="d2">Store_EdekaHessenring</data>
  <data key="d3">3157</data>
  <data key="d6">0.0</data>
  <data key="d4">0.0</data>
</node>
<node id="1495">
  <data key="d0">Eggs</data>
  <data key="d1">Peine</data>
  <data key="d2">Warehouse_EdekaMindenHannover</data>
  <data key="d3">3157</data>
  <data key="d6">0.0</data>
  <data key="d4">0.0</data>
</node>
<node id="1496">
  <data key="d0">Eggs</data>
  <data key="d1">Peine</data>
  <data key="d2">Store_EdekaMindenHannover</data>
  <data key="d3">3157</data>
  <data key="d6">233.65046663247628</data>
  <data key="d4">233.65046663247628</data>
</node>
<node id="1497">
  <data key="d0">Eggs</data>
  <data key="d1">Peine</data>
  <data key="d2">Warehouse_EdekaNord</data>
  <data key="d3">3157</data>
  <data key="d6">0.0</data>
  <data key="d4">0.0</data>
</node>
<node id="1498">
  <data key="d0">Eggs</data>
  <data key="d1">Peine</data>
  <data key="d2">Store_EdekaNord</data>
  <data key="d3">3157</data>
  <data key="d6">0.0</data>
  <data key="d4">0.0</data>
</node>
<node id="1499">
  <data key="d0">Eggs</data>
  <data key="d1">Peine</data>
  <data key="d2">Warehouse_EdekaNordbayern</data>
  <data key="d3">3157</data>
  <data key="d6">0.0</data>
  <data key="d4">0.0</data>
</node>
<node id="1500">
  <data key="d0">Eggs</data>
  <data key="d1">Peine</data>
  <data key="d2">Store_EdekaNordbayern</data>
  <data key="d3">3157</data>
  <data key="d6">0.0</data>
  <data key="d4">0.0</data>
</node>
<node id="1501">
  <data key="d0">Eggs</data>
  <data key="d1">Peine</data>
  <data key="d2">Warehouse_EdekaRheinRuhr</data>
  <data key="d3">3157</data>
  <data key="d6">0.0</data>
  <data key="d4">0.0</data>
</node>
<node id="1502">
  <data key="d0">Eggs</data>
  <data key="d1">Peine</data>
  <data key="d2">Store_EdekaRheinRuhr</data>
  <data key="d3">3157</data>
  <data key="d6">0.0</data>
  <data key="d4">0.0</data>
</node>
<node id="1503">
  <data key="d0">Eggs</data>
  <data key="d1">Peine</data>
  <data key="d2">Warehouse_EdekaSuedbayern</data>
  <data key="d3">3157</data>
  <data key="d6">0.0</data>
  <data key="d4">0.0</data>
</node>
<node id="1504">
  <data key="d0">Eggs</data>
  <data key="d1">Peine</data>
  <data key="d2">Store_EdekaSuedbayern</data>
  <data key="d3">3157</data>
  <data key="d6">0.0</data>
  <data key="d4">0.0</data>
</node>
<node id="1505">
  <data key="d0">Eggs</data>
  <data key="d1">Peine</data>
  <data key="d2">Warehouse_EdekaSuedwest</data>
  <data key="d3">3157</data>
  <data key="d6">0.0</data>
  <data key="d4">0.0</data>
</node>
<node id="1506">
  <data key="d0">Eggs</data>
  <data key="d1">Peine</data>
  <data key="d2">Store_EdekaSuedwest</data>
  <data key="d3">3157</data>
  <data key="d6">0.0</data>
  <data key="d4">0.0</data>
</node>
<node id="1507">
  <data key="d0">Eggs</data>
  <data key="d1">Peine</data>
  <data key="d2">Warehouse_Globus</data>
  <data key="d3">3157</data>
  <data key="d6">0.0</data>
  <data key="d4">0.0</data>
</node>
<node id="1508">
  <data key="d0">Eggs</data>
  <data key="d1">Peine</data>
  <data key="d2">Store_Globus</data>
  <data key="d3">3157</data>
  <data key="d6">0.0</data>
  <data key="d4">0.0</data>
</node>
<node id="1509">
  <data key="d0">Eggs</data>
  <data key="d1">Peine</data>
  <data key="d2">Warehouse_Kaes</data>
  <data key="d3">3157</data>
  <data key="d6">0.0</data>
  <data key="d4">0.0</data>
</node>
<node id="1510">
  <data key="d0">Eggs</data>
  <data key="d1">Peine</data>
  <data key="d2">Store_Kaes</data>
  <data key="d3">3157</data>
  <data key="d6">0.0</data>
  <data key="d4">0.0</data>
</node>
<node id="1511">
  <data key="d0">Eggs</data>
  <data key="d1">Peine</data>
  <data key="d2">Warehouse_KaisersTengelmann</data>
  <data key="d3">3157</data>
  <data key="d6">0.0</data>
  <data key="d4">0.0</data>
</node>
<node id="1512">
  <data key="d0">Eggs</data>
  <data key="d1">Peine</data>
  <data key="d2">Store_KaisersTengelmann</data>
  <data key="d3">3157</data>
  <data key="d6">0.0</data>
  <data key="d4">0.0</data>
</node>
<node id="1513">
  <data key="d0">Eggs</data>
  <data key="d1">Peine</data>
  <data key="d2">Warehouse_Kaufland</data>
  <data key="d3">3157</data>
  <data key="d6">0.0</data>
  <data key="d4">0.0</data>
</node>
<node id="1514">
  <data key="d0">Eggs</data>
  <data key="d1">Peine</data>
  <data key="d2">Store_Kaufland</data>
  <data key="d3">3157</data>
  <data key="d6">51.29453108147772</data>
  <data key="d4">51.29453108147772</data>
</node>
<node id="1515">
  <data key="d0">Eggs</data>
  <data key="d1">Peine</data>
  <data key="d2">Warehouse_KlaasKock</data>
  <data key="d3">3157</data>
  <data key="d6">0.0</data>
  <data key="d4">0.0</data>
</node>
<node id="1516">
  <data key="d0">Eggs</data>
  <data key="d1">Peine</data>
  <data key="d2">Store_KlaasKock</data>
  <data key="d3">3157</data>
  <data key="d6">0.0</data>
  <data key="d4">0.0</data>
</node>
<node id="1517">
  <data key="d0">Eggs</data>
  <data key="d1">Peine</data>
  <data key="d2">Warehouse_Lidl</data>
  <data key="d3">3157</data>
  <data key="d6">0.0</data>
  <data key="d4">0.0</data>
</node>
<node id="1518">
  <data key="d0">Eggs</data>
  <data key="d1">Peine</data>
  <data key="d2">Store_Lidl</data>
  <data key="d3">3157</data>
  <data key="d6">142.91564815357725</data>
  <data key="d4">142.91564815357725</data>
</node>
<node id="1519">
  <data key="d0">Eggs</data>
  <data key="d1">Peine</data>
  <data key="d2">Warehouse_Netto</data>
  <data key="d3">3157</data>
  <data key="d6">0.0</data>
  <data key="d4">0.0</data>
</node>
<node id="1520">
  <data key="d0">Eggs</data>
  <data key="d1">Peine</data>
  <data key="d2">Store_Netto</data>
  <data key="d3">3157</data>
  <data key="d6">99.893237275304</data>
  <data key="d4">99.893237275304</data>
</node>
<node id="1521">
  <data key="d0">Eggs</data>
  <data key="d1">Peine</data>
  <data key="d2">Warehouse_NettoNord</data>
  <data key="d3">3157</data>
  <data key="d6">0.0</data>
  <data key="d4">0.0</data>
</node>
<node id="1522">
  <data key="d0">Eggs</data>
  <data key="d1">Peine</data>
  <data key="d2">Store_NettoNord</data>
  <data key="d3">3157</data>
  <data key="d6">0.0</data>
  <data key="d4">0.0</data>
</node>
<node id="1523">
  <data key="d0">Eggs</data>
  <data key="d1">Peine</data>
  <data key="d2">Warehouse_Norma</data>
  <data key="d3">3157</data>
  <data key="d6">0.0</data>
  <data key="d4">0.0</data>
</node>
<node id="1524">
  <data key="d0">Eggs</data>
  <data key="d1">Peine</data>
  <data key="d2">Store_Norma</data>
  <data key="d3">3157</data>
  <data key="d6">0.0</data>
  <data key="d4">0.0</data>
</node>
<node id="1525">
  <data key="d0">Eggs</data>
  <data key="d1">Peine</data>
  <data key="d2">Warehouse_Penny</data>
  <data key="d3">3157</data>
  <data key="d6">0.0</data>
  <data key="d4">0.0</data>
</node>
<node id="1526">
  <data key="d0">Eggs</data>
  <data key="d1">Peine</data>
  <data key="d2">Store_Penny</data>
  <data key="d3">3157</data>
  <data key="d6">61.67161044353333</data>
  <data key="d4">61.67161044353333</data>
</node>
<node id="1527">
  <data key="d0">Eggs</data>
  <data key="d1">Peine</data>
  <data key="d2">Warehouse_Real</data>
  <data key="d3">3157</data>
  <data key="d6">0.0</data>
  <data key="d4">0.0</data>
</node>
<node id="1528">
  <data key="d0">Eggs</data>
  <data key="d1">Peine</data>
  <data key="d2">Store_Real</data>
  <data key="d3">3157</data>
  <data key="d6">0.0</data>
  <data key="d4">0.0</data>
</node>
<node id="1529">
  <data key="d0">Eggs</data>
  <data key="d1">Peine</data>
  <data key="d2">Warehouse_ReweHit</data>
  <data key="d3">3157</data>
  <data key="d6">0.0</data>
  <data key="d4">0.0</data>
</node>
<node id="1530">
  <data key="d0">Eggs</data>
  <data key="d1">Peine</data>
  <data key="d2">Store_ReweHit</data>
  <data key="d3">3157</data>
  <data key="d6">249.52998309398487</data>
  <data key="d4">249.52998309398487</data>
</node>
<node id="1531">
  <data key="d0">Eggs</data>
  <data key="d1">Peine</data>
  <data key="d2">Warehouse_Tegut</data>
  <data key="d3">3157</data>
  <data key="d6">0.0</data>
  <data key="d4">0.0</data>
</node>
<node id="1532">
  <data key="d0">Eggs</data>
  <data key="d1">Peine</data>
  <data key="d2">Store_Tegut</data>
  <data key="d3">3157</data>
  <data key="d6">0.0</data>
  <data key="d4">0.0</data>
</node>
<node id="1533">
  <data key="d0">Eggs</data>
  <data key="d1">Peine</data>
  <data key="d2">Warehouse_Wasgau</data>
  <data key="d3">3157</data>
  <data key="d6">0.0</data>
  <data key="d4">0.0</data>
</node>
<node id="1534">
  <data key="d0">Eggs</data>
  <data key="d1">Peine</data>
  <data key="d2">Store_Wasgau</data>
  <data key="d3">3157</data>
  <data key="d6">0.0</data>
  <data key="d4">0.0</data>
</node>
<node id="1535">
  <data key="d0">Eggs</data>
  <data key="d1">Wolfenbüttel</data>
  <data key="d2">Producer</data>
  <data key="d3">3158</data>
  <data key="d4">52.324572716407495</data>
</node>
<node id="1536">
  <data key="d0">Eggs</data>
  <data key="d1">Wolfenbüttel</data>
  <data key="d2">Consumer</data>
  <data key="d3">3158</data>
  <data key="d5">1120.264164064101</data>
</node>
<node id="1537">
  <data key="d0">Eggs</data>
  <data key="d1">Wolfenbüttel</data>
  <data key="d2">Wholesale</data>
  <data key="d3">3158</data>
  <data key="d6">184.8435870705767</data>
  <data key="d4">184.8435870705767</data>
</node>
<node id="1538">
  <data key="d0">Eggs</data>
  <data key="d1">Wolfenbüttel</data>
  <data key="d2">Warehouse_AldiNord</data>
  <data key="d3">3158</data>
  <data key="d6">0.0</data>
  <data key="d4">0.0</data>
</node>
<node id="1539">
  <data key="d0">Eggs</data>
  <data key="d1">Wolfenbüttel</data>
  <data key="d2">Store_AldiNord</data>
  <data key="d3">3158</data>
  <data key="d6">145.33052687794086</data>
  <data key="d4">145.33052687794086</data>
</node>
<node id="1540">
  <data key="d0">Eggs</data>
  <data key="d1">Wolfenbüttel</data>
  <data key="d2">Warehouse_AldiSued</data>
  <data key="d3">3158</data>
  <data key="d6">0.0</data>
  <data key="d4">0.0</data>
</node>
<node id="1541">
  <data key="d0">Eggs</data>
  <data key="d1">Wolfenbüttel</data>
  <data key="d2">Store_AldiSued</data>
  <data key="d3">3158</data>
  <data key="d6">0.0</data>
  <data key="d4">0.0</data>
</node>
<node id="1542">
  <data key="d0">Eggs</data>
  <data key="d1">Wolfenbüttel</data>
  <data key="d2">Warehouse_Alnatura</data>
  <data key="d3">3158</data>
  <data key="d6">0.0</data>
  <data key="d4">0.0</data>
</node>
<node id="1543">
  <data key="d0">Eggs</data>
  <data key="d1">Wolfenbüttel</data>
  <data key="d2">Store_Alnatura</data>
  <data key="d3">3158</data>
  <data key="d6">0.0</data>
  <data key="d4">0.0</data>
</node>
<node id="1544">
  <data key="d0">Eggs</data>
  <data key="d1">Wolfenbüttel</data>
  <data key="d2">Warehouse_BartelsLangness</data>
  <data key="d3">3158</data>
  <data key="d6">0.0</data>
  <data key="d4">0.0</data>
</node>
<node id="1545">
  <data key="d0">Eggs</data>
  <data key="d1">Wolfenbüttel</data>
  <data key="d2">Store_BartelsLangness</data>
  <data key="d3">3158</data>
  <data key="d6">0.0</data>
  <data key="d4">0.0</data>
</node>
<node id="1546">
  <data key="d0">Eggs</data>
  <data key="d1">Wolfenbüttel</data>
  <data key="d2">Warehouse_Buenting</data>
  <data key="d3">3158</data>
  <data key="d6">0.0</data>
  <data key="d4">0.0</data>
</node>
<node id="1547">
  <data key="d0">Eggs</data>
  <data key="d1">Wolfenbüttel</data>
  <data key="d2">Store_Buenting</data>
  <data key="d3">3158</data>
  <data key="d6">0.0</data>
  <data key="d4">0.0</data>
</node>
<node id="1548">
  <data key="d0">Eggs</data>
  <data key="d1">Wolfenbüttel</data>
  <data key="d2">Warehouse_Coop</data>
  <data key="d3">3158</data>
  <data key="d6">0.0</data>
  <data key="d4">0.0</data>
</node>
<node id="1549">
  <data key="d0">Eggs</data>
  <data key="d1">Wolfenbüttel</data>
  <data key="d2">Store_Coop</data>
  <data key="d3">3158</data>
  <data key="d6">0.0</data>
  <data key="d4">0.0</data>
</node>
<node id="1550">
  <data key="d0">Eggs</data>
  <data key="d1">Wolfenbüttel</data>
  <data key="d2">Warehouse_Dennree</data>
  <data key="d3">3158</data>
  <data key="d6">0.0</data>
  <data key="d4">0.0</data>
</node>
<node id="1551">
  <data key="d0">Eggs</data>
  <data key="d1">Wolfenbüttel</data>
  <data key="d2">Store_Dennree</data>
  <data key="d3">3158</data>
  <data key="d6">0.0</data>
  <data key="d4">0.0</data>
</node>
<node id="1552">
  <data key="d0">Eggs</data>
  <data key="d1">Wolfenbüttel</data>
  <data key="d2">Warehouse_EdekaHessenring</data>
  <data key="d3">3158</data>
  <data key="d6">0.0</data>
  <data key="d4">0.0</data>
</node>
<node id="1553">
  <data key="d0">Eggs</data>
  <data key="d1">Wolfenbüttel</data>
  <data key="d2">Store_EdekaHessenring</data>
  <data key="d3">3158</data>
  <data key="d6">0.0</data>
  <data key="d4">0.0</data>
</node>
<node id="1554">
  <data key="d0">Eggs</data>
  <data key="d1">Wolfenbüttel</data>
  <data key="d2">Warehouse_EdekaMindenHannover</data>
  <data key="d3">3158</data>
  <data key="d6">0.0</data>
  <data key="d4">0.0</data>
</node>
<node id="1555">
  <data key="d0">Eggs</data>
  <data key="d1">Wolfenbüttel</data>
  <data key="d2">Store_EdekaMindenHannover</data>
  <data key="d3">3158</data>
  <data key="d6">307.83505057731503</data>
  <data key="d4">307.83505057731503</data>
</node>
<node id="1556">
  <data key="d0">Eggs</data>
  <data key="d1">Wolfenbüttel</data>
  <data key="d2">Warehouse_EdekaNord</data>
  <data key="d3">3158</data>
  <data key="d6">0.0</data>
  <data key="d4">0.0</data>
</node>
<node id="1557">
  <data key="d0">Eggs</data>
  <data key="d1">Wolfenbüttel</data>
  <data key="d2">Store_EdekaNord</data>
  <data key="d3">3158</data>
  <data key="d6">0.0</data>
  <data key="d4">0.0</data>
</node>
<node id="1558">
  <data key="d0">Eggs</data>
  <data key="d1">Wolfenbüttel</data>
  <data key="d2">Warehouse_EdekaNordbayern</data>
  <data key="d3">3158</data>
  <data key="d6">0.0</data>
  <data key="d4">0.0</data>
</node>
<node id="1559">
  <data key="d0">Eggs</data>
  <data key="d1">Wolfenbüttel</data>
  <data key="d2">Store_EdekaNordbayern</data>
  <data key="d3">3158</data>
  <data key="d6">0.0</data>
  <data key="d4">0.0</data>
</node>
<node id="1560">
  <data key="d0">Eggs</data>
  <data key="d1">Wolfenbüttel</data>
  <data key="d2">Warehouse_EdekaRheinRuhr</data>
  <data key="d3">3158</data>
  <data key="d6">0.0</data>
  <data key="d4">0.0</data>
</node>
<node id="1561">
  <data key="d0">Eggs</data>
  <data key="d1">Wolfenbüttel</data>
  <data key="d2">Store_EdekaRheinRuhr</data>
  <data key="d3">3158</data>
  <data key="d6">0.0</data>
  <data key="d4">0.0</data>
</node>
<node id="1562">
  <data key="d0">Eggs</data>
  <data key="d1">Wolfenbüttel</data>
  <data key="d2">Warehouse_EdekaSuedbayern</data>
  <data key="d3">3158</data>
  <data key="d6">0.0</data>
  <data key="d4">0.0</data>
</node>
<node id="1563">
  <data key="d0">Eggs</data>
  <data key="d1">Wolfenbüttel</data>
  <data key="d2">Store_EdekaSuedbayern</data>
  <data key="d3">3158</data>
  <data key="d6">0.0</data>
  <data key="d4">0.0</data>
</node>
<node id="1564">
  <data key="d0">Eggs</data>
  <data key="d1">Wolfenbüttel</data>
  <data key="d2">Warehouse_EdekaSuedwest</data>
  <data key="d3">3158</data>
  <data key="d6">0.0</data>
  <data key="d4">0.0</data>
</node>
<node id="1565">
  <data key="d0">Eggs</data>
  <data key="d1">Wolfenbüttel</data>
  <data key="d2">Store_EdekaSuedwest</data>
  <data key="d3">3158</data>
  <data key="d6">0.0</data>
  <data key="d4">0.0</data>
</node>
<node id="1566">
  <data key="d0">Eggs</data>
  <data key="d1">Wolfenbüttel</data>
  <data key="d2">Warehouse_Globus</data>
  <data key="d3">3158</data>
  <data key="d6">0.0</data>
  <data key="d4">0.0</data>
</node>
<node id="1567">
  <data key="d0">Eggs</data>
  <data key="d1">Wolfenbüttel</data>
  <data key="d2">Store_Globus</data>
  <data key="d3">3158</data>
  <data key="d6">0.0</data>
  <data key="d4">0.0</data>
</node>
<node id="1568">
  <data key="d0">Eggs</data>
  <data key="d1">Wolfenbüttel</data>
  <data key="d2">Warehouse_Kaes</data>
  <data key="d3">3158</data>
  <data key="d6">0.0</data>
  <data key="d4">0.0</data>
</node>
<node id="1569">
  <data key="d0">Eggs</data>
  <data key="d1">Wolfenbüttel</data>
  <data key="d2">Store_Kaes</data>
  <data key="d3">3158</data>
  <data key="d6">0.0</data>
  <data key="d4">0.0</data>
</node>
<node id="1570">
  <data key="d0">Eggs</data>
  <data key="d1">Wolfenbüttel</data>
  <data key="d2">Warehouse_KaisersTengelmann</data>
  <data key="d3">3158</data>
  <data key="d6">0.0</data>
  <data key="d4">0.0</data>
</node>
<node id="1571">
  <data key="d0">Eggs</data>
  <data key="d1">Wolfenbüttel</data>
  <data key="d2">Store_KaisersTengelmann</data>
  <data key="d3">3158</data>
  <data key="d6">0.0</data>
  <data key="d4">0.0</data>
</node>
<node id="1572">
  <data key="d0">Eggs</data>
  <data key="d1">Wolfenbüttel</data>
  <data key="d2">Warehouse_Kaufland</data>
  <data key="d3">3158</data>
  <data key="d6">0.0</data>
  <data key="d4">0.0</data>
</node>
<node id="1573">
  <data key="d0">Eggs</data>
  <data key="d1">Wolfenbüttel</data>
  <data key="d2">Store_Kaufland</data>
  <data key="d3">3158</data>
  <data key="d6">0.0</data>
  <data key="d4">0.0</data>
</node>
<node id="1574">
  <data key="d0">Eggs</data>
  <data key="d1">Wolfenbüttel</data>
  <data key="d2">Warehouse_KlaasKock</data>
  <data key="d3">3158</data>
  <data key="d6">0.0</data>
  <data key="d4">0.0</data>
</node>
<node id="1575">
  <data key="d0">Eggs</data>
  <data key="d1">Wolfenbüttel</data>
  <data key="d2">Store_KlaasKock</data>
  <data key="d3">3158</data>
  <data key="d6">0.0</data>
  <data key="d4">0.0</data>
</node>
<node id="1576">
  <data key="d0">Eggs</data>
  <data key="d1">Wolfenbüttel</data>
  <data key="d2">Warehouse_Lidl</data>
  <data key="d3">3158</data>
  <data key="d6">0.0</data>
  <data key="d4">0.0</data>
</node>
<node id="1577">
  <data key="d0">Eggs</data>
  <data key="d1">Wolfenbüttel</data>
  <data key="d2">Store_Lidl</data>
  <data key="d3">3158</data>
  <data key="d6">108.62454740146798</data>
  <data key="d4">108.62454740146798</data>
</node>
<node id="1578">
  <data key="d0">Eggs</data>
  <data key="d1">Wolfenbüttel</data>
  <data key="d2">Warehouse_Netto</data>
  <data key="d3">3158</data>
  <data key="d6">0.0</data>
  <data key="d4">0.0</data>
</node>
<node id="1579">
  <data key="d0">Eggs</data>
  <data key="d1">Wolfenbüttel</data>
  <data key="d2">Store_Netto</data>
  <data key="d3">3158</data>
  <data key="d6">82.68670323179761</data>
  <data key="d4">82.68670323179761</data>
</node>
<node id="1580">
  <data key="d0">Eggs</data>
  <data key="d1">Wolfenbüttel</data>
  <data key="d2">Warehouse_NettoNord</data>
  <data key="d3">3158</data>
  <data key="d6">0.0</data>
  <data key="d4">0.0</data>
</node>
<node id="1581">
  <data key="d0">Eggs</data>
  <data key="d1">Wolfenbüttel</data>
  <data key="d2">Store_NettoNord</data>
  <data key="d3">3158</data>
  <data key="d6">0.0</data>
  <data key="d4">0.0</data>
</node>
<node id="1582">
  <data key="d0">Eggs</data>
  <data key="d1">Wolfenbüttel</data>
  <data key="d2">Warehouse_Norma</data>
  <data key="d3">3158</data>
  <data key="d6">0.0</data>
  <data key="d4">0.0</data>
</node>
<node id="1583">
  <data key="d0">Eggs</data>
  <data key="d1">Wolfenbüttel</data>
  <data key="d2">Store_Norma</data>
  <data key="d3">3158</data>
  <data key="d6">0.0</data>
  <data key="d4">0.0</data>
</node>
<node id="1584">
  <data key="d0">Eggs</data>
  <data key="d1">Wolfenbüttel</data>
  <data key="d2">Warehouse_Penny</data>
  <data key="d3">3158</data>
  <data key="d6">0.0</data>
  <data key="d4">0.0</data>
</node>
<node id="1585">
  <data key="d0">Eggs</data>
  <data key="d1">Wolfenbüttel</data>
  <data key="d2">Store_Penny</data>
  <data key="d3">3158</data>
  <data key="d6">26.252242280817875</data>
  <data key="d4">26.252242280817875</data>
</node>
<node id="1586">
  <data key="d0">Eggs</data>
  <data key="d1">Wolfenbüttel</data>
  <data key="d2">Warehouse_Real</data>
  <data key="d3">3158</data>
  <data key="d6">0.0</data>
  <data key="d4">0.0</data>
</node>
<node id="1587">
  <data key="d0">Eggs</data>
  <data key="d1">Wolfenbüttel</data>
  <data key="d2">Store_Real</data>
  <data key="d3">3158</data>
  <data key="d6">130.23941754285994</data>
  <data key="d4">130.23941754285994</data>
</node>
<node id="1588">
  <data key="d0">Eggs</data>
  <data key="d1">Wolfenbüttel</data>
  <data key="d2">Warehouse_ReweHit</data>
  <data key="d3">3158</data>
  <data key="d6">0.0</data>
  <data key="d4">0.0</data>
</node>
<node id="1589">
  <data key="d0">Eggs</data>
  <data key="d1">Wolfenbüttel</data>
  <data key="d2">Store_ReweHit</data>
  <data key="d3">3158</data>
  <data key="d6">115.85570395786092</data>
  <data key="d4">115.85570395786092</data>
</node>
<node id="1590">
  <data key="d0">Eggs</data>
  <data key="d1">Wolfenbüttel</data>
  <data key="d2">Warehouse_Tegut</data>
  <data key="d3">3158</data>
  <data key="d6">0.0</data>
  <data key="d4">0.0</data>
</node>
<node id="1591">
  <data key="d0">Eggs</data>
  <data key="d1">Wolfenbüttel</data>
  <data key="d2">Store_Tegut</data>
  <data key="d3">3158</data>
  <data key="d6">0.0</data>
  <data key="d4">0.0</data>
</node>
<node id="1592">
  <data key="d0">Eggs</data>
  <data key="d1">Wolfenbüttel</data>
  <data key="d2">Warehouse_Wasgau</data>
  <data key="d3">3158</data>
  <data key="d6">0.0</data>
  <data key="d4">0.0</data>
</node>
<node id="1593">
  <data key="d0">Eggs</data>
  <data key="d1">Wolfenbüttel</data>
  <data key="d2">Store_Wasgau</data>
  <data key="d3">3158</data>
  <data key="d6">0.0</data>
  <data key="d4">0.0</data>
</node>
<node id="1594">
  <data key="d0">Eggs</data>
  <data key="d1">Region Hannover</data>
  <data key="d2">Producer</data>
  <data key="d3">3241</data>
  <data key="d4">936.0719354555815</data>
</node>
<node id="1595">
  <data key="d0">Eggs</data>
  <data key="d1">Region Hannover</data>
  <data key="d2">Consumer</data>
  <data key="d3">3241</data>
  <data key="d5">10377.298207164877</data>
</node>
<node id="1596">
  <data key="d0">Eggs</data>
  <data key="d1">Region Hannover</data>
  <data key="d2">Wholesale</data>
  <data key="d3">3241</data>
  <data key="d6">1712.2542041822048</data>
  <data key="d4">1712.2542041822048</data>
</node>
<node id="1597">
  <data key="d0">Eggs</data>
  <data key="d1">Region Hannover</data>
  <data key="d2">Warehouse_AldiNord</data>
  <data key="d3">3241</data>
  <data key="d6">1510.4472732237748</data>
  <data key="d4">1510.4472732237748</data>
</node>
<node id="1598">
  <data key="d0">Eggs</data>
  <data key="d1">Region Hannover</data>
  <data key="d2">Store_AldiNord</data>
  <data key="d3">3241</data>
  <data key="d6">1045.2115812430238</data>
  <data key="d4">1045.2115812430238</data>
</node>
<node id="1599">
  <data key="d0">Eggs</data>
  <data key="d1">Region Hannover</data>
  <data key="d2">Warehouse_AldiSued</data>
  <data key="d3">3241</data>
  <data key="d6">0.0</data>
  <data key="d4">0.0</data>
</node>
<node id="1600">
  <data key="d0">Eggs</data>
  <data key="d1">Region Hannover</data>
  <data key="d2">Store_AldiSued</data>
  <data key="d3">3241</data>
  <data key="d6">0.0</data>
  <data key="d4">0.0</data>
</node>
<node id="1601">
  <data key="d0">Eggs</data>
  <data key="d1">Region Hannover</data>
  <data key="d2">Warehouse_Alnatura</data>
  <data key="d3">3241</data>
  <data key="d6">0.0</data>
  <data key="d4">0.0</data>
</node>
<node id="1602">
  <data key="d0">Eggs</data>
  <data key="d1">Region Hannover</data>
  <data key="d2">Store_Alnatura</data>
  <data key="d3">3241</data>
  <data key="d6">84.80243410958263</data>
  <data key="d4">84.80243410958263</data>
</node>
<node id="1603">
  <data key="d0">Eggs</data>
  <data key="d1">Region Hannover</data>
  <data key="d2">Warehouse_BartelsLangness</data>
  <data key="d3">3241</data>
  <data key="d6">0.0</data>
  <data key="d4">0.0</data>
</node>
<node id="1604">
  <data key="d0">Eggs</data>
  <data key="d1">Region Hannover</data>
  <data key="d2">Store_BartelsLangness</data>
  <data key="d3">3241</data>
  <data key="d6">181.4846081404786</data>
  <data key="d4">181.4846081404786</data>
</node>
<node id="1605">
  <data key="d0">Eggs</data>
  <data key="d1">Region Hannover</data>
  <data key="d2">Warehouse_Buenting</data>
  <data key="d3">3241</data>
  <data key="d6">0.0</data>
  <data key="d4">0.0</data>
</node>
<node id="1606">
  <data key="d0">Eggs</data>
  <data key="d1">Region Hannover</data>
  <data key="d2">Store_Buenting</data>
  <data key="d3">3241</data>
  <data key="d6">187.6505631169388</data>
  <data key="d4">187.6505631169388</data>
</node>
<node id="1607">
  <data key="d0">Eggs</data>
  <data key="d1">Region Hannover</data>
  <data key="d2">Warehouse_Coop</data>
  <data key="d3">3241</data>
  <data key="d6">0.0</data>
  <data key="d4">0.0</data>
</node>
<node id="1608">
  <data key="d0">Eggs</data>
  <data key="d1">Region Hannover</data>
  <data key="d2">Store_Coop</data>
  <data key="d3">3241</data>
  <data key="d6">0.0</data>
  <data key="d4">0.0</data>
</node>
<node id="1609">
  <data key="d0">Eggs</data>
  <data key="d1">Region Hannover</data>
  <data key="d2">Warehouse_Dennree</data>
  <data key="d3">3241</data>
  <data key="d6">0.0</data>
  <data key="d4">0.0</data>
</node>
<node id="1610">
  <data key="d0">Eggs</data>
  <data key="d1">Region Hannover</data>
  <data key="d2">Store_Dennree</data>
  <data key="d3">3241</data>
  <data key="d6">81.63724388833306</data>
  <data key="d4">81.63724388833306</data>
</node>
<node id="1611">
  <data key="d0">Eggs</data>
  <data key="d1">Region Hannover</data>
  <data key="d2">Warehouse_EdekaHessenring</data>
  <data key="d3">3241</data>
  <data key="d6">0.0</data>
  <data key="d4">0.0</data>
</node>
<node id="1612">
  <data key="d0">Eggs</data>
  <data key="d1">Region Hannover</data>
  <data key="d2">Store_EdekaHessenring</data>
  <data key="d3">3241</data>
  <data key="d6">0.0</data>
  <data key="d4">0.0</data>
</node>
<node id="1613">
  <data key="d0">Eggs</data>
  <data key="d1">Region Hannover</data>
  <data key="d2">Warehouse_EdekaMindenHannover</data>
  <data key="d3">3241</data>
  <data key="d6">0.0</data>
  <data key="d4">0.0</data>
</node>
<node id="1614">
  <data key="d0">Eggs</data>
  <data key="d1">Region Hannover</data>
  <data key="d2">Store_EdekaMindenHannover</data>
  <data key="d3">3241</data>
  <data key="d6">2277.4160237388305</data>
  <data key="d4">2277.4160237388305</data>
</node>
<node id="1615">
  <data key="d0">Eggs</data>
  <data key="d1">Region Hannover</data>
  <data key="d2">Warehouse_EdekaNord</data>
  <data key="d3">3241</data>
  <data key="d6">0.0</data>
  <data key="d4">0.0</data>
</node>
<node id="1616">
  <data key="d0">Eggs</data>
  <data key="d1">Region Hannover</data>
  <data key="d2">Store_EdekaNord</data>
  <data key="d3">3241</data>
  <data key="d6">0.0</data>
  <data key="d4">0.0</data>
</node>
<node id="1617">
  <data key="d0">Eggs</data>
  <data key="d1">Region Hannover</data>
  <data key="d2">Warehouse_EdekaNordbayern</data>
  <data key="d3">3241</data>
  <data key="d6">0.0</data>
  <data key="d4">0.0</data>
</node>
<node id="1618">
  <data key="d0">Eggs</data>
  <data key="d1">Region Hannover</data>
  <data key="d2">Store_EdekaNordbayern</data>
  <data key="d3">3241</data>
  <data key="d6">0.0</data>
  <data key="d4">0.0</data>
</node>
<node id="1619">
  <data key="d0">Eggs</data>
  <data key="d1">Region Hannover</data>
  <data key="d2">Warehouse_EdekaRheinRuhr</data>
  <data key="d3">3241</data>
  <data key="d6">0.0</data>
  <data key="d4">0.0</data>
</node>
<node id="1620">
  <data key="d0">Eggs</data>
  <data key="d1">Region Hannover</data>
  <data key="d2">Store_EdekaRheinRuhr</data>
  <data key="d3">3241</data>
  <data key="d6">0.0</data>
  <data key="d4">0.0</data>
</node>
<node id="1621">
  <data key="d0">Eggs</data>
  <data key="d1">Region Hannover</data>
  <data key="d2">Warehouse_EdekaSuedbayern</data>
  <data key="d3">3241</data>
  <data key="d6">0.0</data>
  <data key="d4">0.0</data>
</node>
<node id="1622">
  <data key="d0">Eggs</data>
  <data key="d1">Region Hannover</data>
  <data key="d2">Store_EdekaSuedbayern</data>
  <data key="d3">3241</data>
  <data key="d6">0.0</data>
  <data key="d4">0.0</data>
</node>
<node id="1623">
  <data key="d0">Eggs</data>
  <data key="d1">Region Hannover</data>
  <data key="d2">Warehouse_EdekaSuedwest</data>
  <data key="d3">3241</data>
  <data key="d6">0.0</data>
  <data key="d4">0.0</data>
</node>
<node id="1624">
  <data key="d0">Eggs</data>
  <data key="d1">Region Hannover</data>
  <data key="d2">Store_EdekaSuedwest</data>
  <data key="d3">3241</data>
  <data key="d6">0.0</data>
  <data key="d4">0.0</data>
</node>
<node id="1625">
  <data key="d0">Eggs</data>
  <data key="d1">Region Hannover</data>
  <data key="d2">Warehouse_Globus</data>
  <data key="d3">3241</data>
  <data key="d6">0.0</data>
  <data key="d4">0.0</data>
</node>
<node id="1626">
  <data key="d0">Eggs</data>
  <data key="d1">Region Hannover</data>
  <data key="d2">Store_Globus</data>
  <data key="d3">3241</data>
  <data key="d6">0.0</data>
  <data key="d4">0.0</data>
</node>
<node id="1627">
  <data key="d0">Eggs</data>
  <data key="d1">Region Hannover</data>
  <data key="d2">Warehouse_Kaes</data>
  <data key="d3">3241</data>
  <data key="d6">0.0</data>
  <data key="d4">0.0</data>
</node>
<node id="1628">
  <data key="d0">Eggs</data>
  <data key="d1">Region Hannover</data>
  <data key="d2">Store_Kaes</data>
  <data key="d3">3241</data>
  <data key="d6">0.0</data>
  <data key="d4">0.0</data>
</node>
<node id="1629">
  <data key="d0">Eggs</data>
  <data key="d1">Region Hannover</data>
  <data key="d2">Warehouse_KaisersTengelmann</data>
  <data key="d3">3241</data>
  <data key="d6">0.0</data>
  <data key="d4">0.0</data>
</node>
<node id="1630">
  <data key="d0">Eggs</data>
  <data key="d1">Region Hannover</data>
  <data key="d2">Store_KaisersTengelmann</data>
  <data key="d3">3241</data>
  <data key="d6">0.0</data>
  <data key="d4">0.0</data>
</node>
<node id="1631">
  <data key="d0">Eggs</data>
  <data key="d1">Region Hannover</data>
  <data key="d2">Warehouse_Kaufland</data>
  <data key="d3">3241</data>
  <data key="d6">3572.331308613892</data>
  <data key="d4">3572.331308613892</data>
</node>
<node id="1632">
  <data key="d0">Eggs</data>
  <data key="d1">Region Hannover</data>
  <data key="d2">Store_Kaufland</data>
  <data key="d3">3241</data>
  <data key="d6">437.74169696216455</data>
  <data key="d4">437.74169696216455</data>
</node>
<node id="1633">
  <data key="d0">Eggs</data>
  <data key="d1">Region Hannover</data>
  <data key="d2">Warehouse_KlaasKock</data>
  <data key="d3">3241</data>
  <data key="d6">0.0</data>
  <data key="d4">0.0</data>
</node>
<node id="1634">
  <data key="d0">Eggs</data>
  <data key="d1">Region Hannover</data>
  <data key="d2">Store_KlaasKock</data>
  <data key="d3">3241</data>
  <data key="d6">0.0</data>
  <data key="d4">0.0</data>
</node>
<node id="1635">
  <data key="d0">Eggs</data>
  <data key="d1">Region Hannover</data>
  <data key="d2">Warehouse_Lidl</data>
  <data key="d3">3241</data>
  <data key="d6">1858.148234031761</data>
  <data key="d4">1858.148234031761</data>
</node>
<node id="1636">
  <data key="d0">Eggs</data>
  <data key="d1">Region Hannover</data>
  <data key="d2">Store_Lidl</data>
  <data key="d3">3241</data>
  <data key="d6">818.0577999102297</data>
  <data key="d4">818.0577999102297</data>
</node>
<node id="1637">
  <data key="d0">Eggs</data>
  <data key="d1">Region Hannover</data>
  <data key="d2">Warehouse_Netto</data>
  <data key="d3">3241</data>
  <data key="d6">0.0</data>
  <data key="d4">0.0</data>
</node>
<node id="1638">
  <data key="d0">Eggs</data>
  <data key="d1">Region Hannover</data>
  <data key="d2">Store_Netto</data>
  <data key="d3">3241</data>
  <data key="d6">815.4680988201166</data>
  <data key="d4">815.4680988201166</data>
</node>
<node id="1639">
  <data key="d0">Eggs</data>
  <data key="d1">Region Hannover</data>
  <data key="d2">Warehouse_NettoNord</data>
  <data key="d3">3241</data>
  <data key="d6">0.0</data>
  <data key="d4">0.0</data>
</node>
<node id="1640">
  <data key="d0">Eggs</data>
  <data key="d1">Region Hannover</data>
  <data key="d2">Store_NettoNord</data>
  <data key="d3">3241</data>
  <data key="d6">0.0</data>
  <data key="d4">0.0</data>
</node>
<node id="1641">
  <data key="d0">Eggs</data>
  <data key="d1">Region Hannover</data>
  <data key="d2">Warehouse_Norma</data>
  <data key="d3">3241</data>
  <data key="d6">0.0</data>
  <data key="d4">0.0</data>
</node>
<node id="1642">
  <data key="d0">Eggs</data>
  <data key="d1">Region Hannover</data>
  <data key="d2">Store_Norma</data>
  <data key="d3">3241</data>
  <data key="d6">0.0</data>
  <data key="d4">0.0</data>
</node>
<node id="1643">
  <data key="d0">Eggs</data>
  <data key="d1">Region Hannover</data>
  <data key="d2">Warehouse_Penny</data>
  <data key="d3">3241</data>
  <data key="d6">3065.5005591343183</data>
  <data key="d4">3065.5005591343183</data>
</node>
<node id="1644">
  <data key="d0">Eggs</data>
  <data key="d1">Region Hannover</data>
  <data key="d2">Store_Penny</data>
  <data key="d3">3241</data>
  <data key="d6">672.541262465769</data>
  <data key="d4">672.541262465769</data>
</node>
<node id="1645">
  <data key="d0">Eggs</data>
  <data key="d1">Region Hannover</data>
  <data key="d2">Warehouse_Real</data>
  <data key="d3">3241</data>
  <data key="d6">0.0</data>
  <data key="d4">0.0</data>
</node>
<node id="1646">
  <data key="d0">Eggs</data>
  <data key="d1">Region Hannover</data>
  <data key="d2">Store_Real</data>
  <data key="d3">3241</data>
  <data key="d6">729.2680482492029</data>
  <data key="d4">729.2680482492029</data>
</node>
<node id="1647">
  <data key="d0">Eggs</data>
  <data key="d1">Region Hannover</data>
  <data key="d2">Warehouse_ReweHit</data>
  <data key="d3">3241</data>
  <data key="d6">6266.377896553537</data>
  <data key="d4">6266.377896553537</data>
</node>
<node id="1648">
  <data key="d0">Eggs</data>
  <data key="d1">Region Hannover</data>
  <data key="d2">Store_ReweHit</data>
  <data key="d3">3241</data>
  <data key="d6">1161.501492099063</data>
  <data key="d4">1161.501492099063</data>
</node>
<node id="1649">
  <data key="d0">Eggs</data>
  <data key="d1">Region Hannover</data>
  <data key="d2">Warehouse_Tegut</data>
  <data key="d3">3241</data>
  <data key="d6">0.0</data>
  <data key="d4">0.0</data>
</node>
<node id="1650">
  <data key="d0">Eggs</data>
  <data key="d1">Region Hannover</data>
  <data key="d2">Store_Tegut</data>
  <data key="d3">3241</data>
  <data key="d6">0.0</data>
  <data key="d4">0.0</data>
</node>
<node id="1651">
  <data key="d0">Eggs</data>
  <data key="d1">Region Hannover</data>
  <data key="d2">Warehouse_Wasgau</data>
  <data key="d3">3241</data>
  <data key="d6">0.0</data>
  <data key="d4">0.0</data>
</node>
<node id="1652">
  <data key="d0">Eggs</data>
  <data key="d1">Region Hannover</data>
  <data key="d2">Store_Wasgau</data>
  <data key="d3">3241</data>
  <data key="d6">0.0</data>
  <data key="d4">0.0</data>
</node>
<node id="1653">
  <data key="d0">Eggs</data>
  <data key="d1">Diepholz</data>
  <data key="d2">Producer</data>
  <data key="d3">3251</data>
  <data key="d4">12779.069019677769</data>
</node>
<node id="1654">
  <data key="d0">Eggs</data>
  <data key="d1">Diepholz</data>
  <data key="d2">Consumer</data>
  <data key="d3">3251</data>
  <data key="d5">1955.484299004172</data>
</node>
<node id="1655">
  <data key="d0">Eggs</data>
  <data key="d1">Diepholz</data>
  <data key="d2">Wholesale</data>
  <data key="d3">3251</data>
  <data key="d6">322.6549093356884</data>
  <data key="d4">322.6549093356884</data>
</node>
<node id="1656">
  <data key="d0">Eggs</data>
  <data key="d1">Diepholz</data>
  <data key="d2">Warehouse_AldiNord</data>
  <data key="d3">3251</data>
  <data key="d6">0.0</data>
  <data key="d4">0.0</data>
</node>
<node id="1657">
  <data key="d0">Eggs</data>
  <data key="d1">Diepholz</data>
  <data key="d2">Store_AldiNord</data>
  <data key="d3">3251</data>
  <data key="d6">199.417024694372</data>
  <data key="d4">199.417024694372</data>
</node>
<node id="1658">
  <data key="d0">Eggs</data>
  <data key="d1">Diepholz</data>
  <data key="d2">Warehouse_AldiSued</data>
  <data key="d3">3251</data>
  <data key="d6">0.0</data>
  <data key="d4">0.0</data>
</node>
<node id="1659">
  <data key="d0">Eggs</data>
  <data key="d1">Diepholz</data>
  <data key="d2">Store_AldiSued</data>
  <data key="d3">3251</data>
  <data key="d6">0.0</data>
  <data key="d4">0.0</data>
</node>
<node id="1660">
  <data key="d0">Eggs</data>
  <data key="d1">Diepholz</data>
  <data key="d2">Warehouse_Alnatura</data>
  <data key="d3">3251</data>
  <data key="d6">0.0</data>
  <data key="d4">0.0</data>
</node>
<node id="1661">
  <data key="d0">Eggs</data>
  <data key="d1">Diepholz</data>
  <data key="d2">Store_Alnatura</data>
  <data key="d3">3251</data>
  <data key="d6">0.0</data>
  <data key="d4">0.0</data>
</node>
<node id="1662">
  <data key="d0">Eggs</data>
  <data key="d1">Diepholz</data>
  <data key="d2">Warehouse_BartelsLangness</data>
  <data key="d3">3251</data>
  <data key="d6">0.0</data>
  <data key="d4">0.0</data>
</node>
<node id="1663">
  <data key="d0">Eggs</data>
  <data key="d1">Diepholz</data>
  <data key="d2">Store_BartelsLangness</data>
  <data key="d3">3251</data>
  <data key="d6">0.0</data>
  <data key="d4">0.0</data>
</node>
<node id="1664">
  <data key="d0">Eggs</data>
  <data key="d1">Diepholz</data>
  <data key="d2">Warehouse_Buenting</data>
  <data key="d3">3251</data>
  <data key="d6">0.0</data>
  <data key="d4">0.0</data>
</node>
<node id="1665">
  <data key="d0">Eggs</data>
  <data key="d1">Diepholz</data>
  <data key="d2">Store_Buenting</data>
  <data key="d3">3251</data>
  <data key="d6">207.5044130426477</data>
  <data key="d4">207.5044130426477</data>
</node>
<node id="1666">
  <data key="d0">Eggs</data>
  <data key="d1">Diepholz</data>
  <data key="d2">Warehouse_Coop</data>
  <data key="d3">3251</data>
  <data key="d6">0.0</data>
  <data key="d4">0.0</data>
</node>
<node id="1667">
  <data key="d0">Eggs</data>
  <data key="d1">Diepholz</data>
  <data key="d2">Store_Coop</data>
  <data key="d3">3251</data>
  <data key="d6">0.0</data>
  <data key="d4">0.0</data>
</node>
<node id="1668">
  <data key="d0">Eggs</data>
  <data key="d1">Diepholz</data>
  <data key="d2">Warehouse_Dennree</data>
  <data key="d3">3251</data>
  <data key="d6">0.0</data>
  <data key="d4">0.0</data>
</node>
<node id="1669">
  <data key="d0">Eggs</data>
  <data key="d1">Diepholz</data>
  <data key="d2">Store_Dennree</data>
  <data key="d3">3251</data>
  <data key="d6">0.0</data>
  <data key="d4">0.0</data>
</node>
<node id="1670">
  <data key="d0">Eggs</data>
  <data key="d1">Diepholz</data>
  <data key="d2">Warehouse_EdekaHessenring</data>
  <data key="d3">3251</data>
  <data key="d6">0.0</data>
  <data key="d4">0.0</data>
</node>
<node id="1671">
  <data key="d0">Eggs</data>
  <data key="d1">Diepholz</data>
  <data key="d2">Store_EdekaHessenring</data>
  <data key="d3">3251</data>
  <data key="d6">0.0</data>
  <data key="d4">0.0</data>
</node>
<node id="1672">
  <data key="d0">Eggs</data>
  <data key="d1">Diepholz</data>
  <data key="d2">Warehouse_EdekaMindenHannover</data>
  <data key="d3">3251</data>
  <data key="d6">0.0</data>
  <data key="d4">0.0</data>
</node>
<node id="1673">
  <data key="d0">Eggs</data>
  <data key="d1">Diepholz</data>
  <data key="d2">Store_EdekaMindenHannover</data>
  <data key="d3">3251</data>
  <data key="d6">464.9349701553175</data>
  <data key="d4">464.9349701553175</data>
</node>
<node id="1674">
  <data key="d0">Eggs</data>
  <data key="d1">Diepholz</data>
  <data key="d2">Warehouse_EdekaNord</data>
  <data key="d3">3251</data>
  <data key="d6">0.0</data>
  <data key="d4">0.0</data>
</node>
<node id="1675">
  <data key="d0">Eggs</data>
  <data key="d1">Diepholz</data>
  <data key="d2">Store_EdekaNord</data>
  <data key="d3">3251</data>
  <data key="d6">0.0</data>
  <data key="d4">0.0</data>
</node>
<node id="1676">
  <data key="d0">Eggs</data>
  <data key="d1">Diepholz</data>
  <data key="d2">Warehouse_EdekaNordbayern</data>
  <data key="d3">3251</data>
  <data key="d6">0.0</data>
  <data key="d4">0.0</data>
</node>
<node id="1677">
  <data key="d0">Eggs</data>
  <data key="d1">Diepholz</data>
  <data key="d2">Store_EdekaNordbayern</data>
  <data key="d3">3251</data>
  <data key="d6">0.0</data>
  <data key="d4">0.0</data>
</node>
<node id="1678">
  <data key="d0">Eggs</data>
  <data key="d1">Diepholz</data>
  <data key="d2">Warehouse_EdekaRheinRuhr</data>
  <data key="d3">3251</data>
  <data key="d6">0.0</data>
  <data key="d4">0.0</data>
</node>
<node id="1679">
  <data key="d0">Eggs</data>
  <data key="d1">Diepholz</data>
  <data key="d2">Store_EdekaRheinRuhr</data>
  <data key="d3">3251</data>
  <data key="d6">0.0</data>
  <data key="d4">0.0</data>
</node>
<node id="1680">
  <data key="d0">Eggs</data>
  <data key="d1">Diepholz</data>
  <data key="d2">Warehouse_EdekaSuedbayern</data>
  <data key="d3">3251</data>
  <data key="d6">0.0</data>
  <data key="d4">0.0</data>
</node>
<node id="1681">
  <data key="d0">Eggs</data>
  <data key="d1">Diepholz</data>
  <data key="d2">Store_EdekaSuedbayern</data>
  <data key="d3">3251</data>
  <data key="d6">0.0</data>
  <data key="d4">0.0</data>
</node>
<node id="1682">
  <data key="d0">Eggs</data>
  <data key="d1">Diepholz</data>
  <data key="d2">Warehouse_EdekaSuedwest</data>
  <data key="d3">3251</data>
  <data key="d6">0.0</data>
  <data key="d4">0.0</data>
</node>
<node id="1683">
  <data key="d0">Eggs</data>
  <data key="d1">Diepholz</data>
  <data key="d2">Store_EdekaSuedwest</data>
  <data key="d3">3251</data>
  <data key="d6">0.0</data>
  <data key="d4">0.0</data>
</node>
<node id="1684">
  <data key="d0">Eggs</data>
  <data key="d1">Diepholz</data>
  <data key="d2">Warehouse_Globus</data>
  <data key="d3">3251</data>
  <data key="d6">0.0</data>
  <data key="d4">0.0</data>
</node>
<node id="1685">
  <data key="d0">Eggs</data>
  <data key="d1">Diepholz</data>
  <data key="d2">Store_Globus</data>
  <data key="d3">3251</data>
  <data key="d6">0.0</data>
  <data key="d4">0.0</data>
</node>
<node id="1686">
  <data key="d0">Eggs</data>
  <data key="d1">Diepholz</data>
  <data key="d2">Warehouse_Kaes</data>
  <data key="d3">3251</data>
  <data key="d6">0.0</data>
  <data key="d4">0.0</data>
</node>
<node id="1687">
  <data key="d0">Eggs</data>
  <data key="d1">Diepholz</data>
  <data key="d2">Store_Kaes</data>
  <data key="d3">3251</data>
  <data key="d6">0.0</data>
  <data key="d4">0.0</data>
</node>
<node id="1688">
  <data key="d0">Eggs</data>
  <data key="d1">Diepholz</data>
  <data key="d2">Warehouse_KaisersTengelmann</data>
  <data key="d3">3251</data>
  <data key="d6">0.0</data>
  <data key="d4">0.0</data>
</node>
<node id="1689">
  <data key="d0">Eggs</data>
  <data key="d1">Diepholz</data>
  <data key="d2">Store_KaisersTengelmann</data>
  <data key="d3">3251</data>
  <data key="d6">0.0</data>
  <data key="d4">0.0</data>
</node>
<node id="1690">
  <data key="d0">Eggs</data>
  <data key="d1">Diepholz</data>
  <data key="d2">Warehouse_Kaufland</data>
  <data key="d3">3251</data>
  <data key="d6">0.0</data>
  <data key="d4">0.0</data>
</node>
<node id="1691">
  <data key="d0">Eggs</data>
  <data key="d1">Diepholz</data>
  <data key="d2">Store_Kaufland</data>
  <data key="d3">3251</data>
  <data key="d6">0.0</data>
  <data key="d4">0.0</data>
</node>
<node id="1692">
  <data key="d0">Eggs</data>
  <data key="d1">Diepholz</data>
  <data key="d2">Warehouse_KlaasKock</data>
  <data key="d3">3251</data>
  <data key="d6">0.0</data>
  <data key="d4">0.0</data>
</node>
<node id="1693">
  <data key="d0">Eggs</data>
  <data key="d1">Diepholz</data>
  <data key="d2">Store_KlaasKock</data>
  <data key="d3">3251</data>
  <data key="d6">49.06348931287271</data>
  <data key="d4">49.06348931287271</data>
</node>
<node id="1694">
  <data key="d0">Eggs</data>
  <data key="d1">Diepholz</data>
  <data key="d2">Warehouse_Lidl</data>
  <data key="d3">3251</data>
  <data key="d6">0.0</data>
  <data key="d4">0.0</data>
</node>
<node id="1695">
  <data key="d0">Eggs</data>
  <data key="d1">Diepholz</data>
  <data key="d2">Store_Lidl</data>
  <data key="d3">3251</data>
  <data key="d6">198.69814573008082</data>
  <data key="d4">198.69814573008082</data>
</node>
<node id="1696">
  <data key="d0">Eggs</data>
  <data key="d1">Diepholz</data>
  <data key="d2">Warehouse_Netto</data>
  <data key="d3">3251</data>
  <data key="d6">0.0</data>
  <data key="d4">0.0</data>
</node>
<node id="1697">
  <data key="d0">Eggs</data>
  <data key="d1">Diepholz</data>
  <data key="d2">Store_Netto</data>
  <data key="d3">3251</data>
  <data key="d6">162.07126249944545</data>
  <data key="d4">162.07126249944545</data>
</node>
<node id="1698">
  <data key="d0">Eggs</data>
  <data key="d1">Diepholz</data>
  <data key="d2">Warehouse_NettoNord</data>
  <data key="d3">3251</data>
  <data key="d6">0.0</data>
  <data key="d4">0.0</data>
</node>
<node id="1699">
  <data key="d0">Eggs</data>
  <data key="d1">Diepholz</data>
  <data key="d2">Store_NettoNord</data>
  <data key="d3">3251</data>
  <data key="d6">0.0</data>
  <data key="d4">0.0</data>
</node>
<node id="1700">
  <data key="d0">Eggs</data>
  <data key="d1">Diepholz</data>
  <data key="d2">Warehouse_Norma</data>
  <data key="d3">3251</data>
  <data key="d6">0.0</data>
  <data key="d4">0.0</data>
</node>
<node id="1701">
  <data key="d0">Eggs</data>
  <data key="d1">Diepholz</data>
  <data key="d2">Store_Norma</data>
  <data key="d3">3251</data>
  <data key="d6">0.0</data>
  <data key="d4">0.0</data>
</node>
<node id="1702">
  <data key="d0">Eggs</data>
  <data key="d1">Diepholz</data>
  <data key="d2">Warehouse_Penny</data>
  <data key="d3">3251</data>
  <data key="d6">0.0</data>
  <data key="d4">0.0</data>
</node>
<node id="1703">
  <data key="d0">Eggs</data>
  <data key="d1">Diepholz</data>
  <data key="d2">Store_Penny</data>
  <data key="d3">3251</data>
  <data key="d6">12.005278703662626</data>
  <data key="d4">12.005278703662626</data>
</node>
<node id="1704">
  <data key="d0">Eggs</data>
  <data key="d1">Diepholz</data>
  <data key="d2">Warehouse_Real</data>
  <data key="d3">3251</data>
  <data key="d6">0.0</data>
  <data key="d4">0.0</data>
</node>
<node id="1705">
  <data key="d0">Eggs</data>
  <data key="d1">Diepholz</data>
  <data key="d2">Store_Real</data>
  <data key="d3">3251</data>
  <data key="d6">119.11824438304774</data>
  <data key="d4">119.11824438304774</data>
</node>
<node id="1706">
  <data key="d0">Eggs</data>
  <data key="d1">Diepholz</data>
  <data key="d2">Warehouse_ReweHit</data>
  <data key="d3">3251</data>
  <data key="d6">0.0</data>
  <data key="d4">0.0</data>
</node>
<node id="1707">
  <data key="d0">Eggs</data>
  <data key="d1">Diepholz</data>
  <data key="d2">Store_ReweHit</data>
  <data key="d3">3251</data>
  <data key="d6">187.5555217835676</data>
  <data key="d4">187.5555217835676</data>
</node>
<node id="1708">
  <data key="d0">Eggs</data>
  <data key="d1">Diepholz</data>
  <data key="d2">Warehouse_Tegut</data>
  <data key="d3">3251</data>
  <data key="d6">0.0</data>
  <data key="d4">0.0</data>
</node>
<node id="1709">
  <data key="d0">Eggs</data>
  <data key="d1">Diepholz</data>
  <data key="d2">Store_Tegut</data>
  <data key="d3">3251</data>
  <data key="d6">0.0</data>
  <data key="d4">0.0</data>
</node>
<node id="1710">
  <data key="d0">Eggs</data>
  <data key="d1">Diepholz</data>
  <data key="d2">Warehouse_Wasgau</data>
  <data key="d3">3251</data>
  <data key="d6">0.0</data>
  <data key="d4">0.0</data>
</node>
<node id="1711">
  <data key="d0">Eggs</data>
  <data key="d1">Diepholz</data>
  <data key="d2">Store_Wasgau</data>
  <data key="d3">3251</data>
  <data key="d6">0.0</data>
  <data key="d4">0.0</data>
</node>
<node id="1712">
  <data key="d0">Eggs</data>
  <data key="d1">Hameln-Pyrmont</data>
  <data key="d2">Producer</data>
  <data key="d3">3252</data>
  <data key="d4">818.9626955104857</data>
</node>
<node id="1713">
  <data key="d0">Eggs</data>
  <data key="d1">Hameln-Pyrmont</data>
  <data key="d2">Consumer</data>
  <data key="d3">3252</data>
  <data key="d5">1385.2749970176499</data>
</node>
<node id="1714">
  <data key="d0">Eggs</data>
  <data key="d1">Hameln-Pyrmont</data>
  <data key="d2">Wholesale</data>
  <data key="d3">3252</data>
  <data key="d6">228.57037450791225</data>
  <data key="d4">228.57037450791225</data>
</node>
<node id="1715">
  <data key="d0">Eggs</data>
  <data key="d1">Hameln-Pyrmont</data>
  <data key="d2">Warehouse_AldiNord</data>
  <data key="d3">3252</data>
  <data key="d6">0.0</data>
  <data key="d4">0.0</data>
</node>
<node id="1716">
  <data key="d0">Eggs</data>
  <data key="d1">Hameln-Pyrmont</data>
  <data key="d2">Store_AldiNord</data>
  <data key="d3">3252</data>
  <data key="d6">164.2526238082167</data>
  <data key="d4">164.2526238082167</data>
</node>
<node id="1717">
  <data key="d0">Eggs</data>
  <data key="d1">Hameln-Pyrmont</data>
  <data key="d2">Warehouse_AldiSued</data>
  <data key="d3">3252</data>
  <data key="d6">0.0</data>
  <data key="d4">0.0</data>
</node>
<node id="1718">
  <data key="d0">Eggs</data>
  <data key="d1">Hameln-Pyrmont</data>
  <data key="d2">Store_AldiSued</data>
  <data key="d3">3252</data>
  <data key="d6">0.0</data>
  <data key="d4">0.0</data>
</node>
<node id="1719">
  <data key="d0">Eggs</data>
  <data key="d1">Hameln-Pyrmont</data>
  <data key="d2">Warehouse_Alnatura</data>
  <data key="d3">3252</data>
  <data key="d6">0.0</data>
  <data key="d4">0.0</data>
</node>
<node id="1720">
  <data key="d0">Eggs</data>
  <data key="d1">Hameln-Pyrmont</data>
  <data key="d2">Store_Alnatura</data>
  <data key="d3">3252</data>
  <data key="d6">0.0</data>
  <data key="d4">0.0</data>
</node>
<node id="1721">
  <data key="d0">Eggs</data>
  <data key="d1">Hameln-Pyrmont</data>
  <data key="d2">Warehouse_BartelsLangness</data>
  <data key="d3">3252</data>
  <data key="d6">0.0</data>
  <data key="d4">0.0</data>
</node>
<node id="1722">
  <data key="d0">Eggs</data>
  <data key="d1">Hameln-Pyrmont</data>
  <data key="d2">Store_BartelsLangness</data>
  <data key="d3">3252</data>
  <data key="d6">0.0</data>
  <data key="d4">0.0</data>
</node>
<node id="1723">
  <data key="d0">Eggs</data>
  <data key="d1">Hameln-Pyrmont</data>
  <data key="d2">Warehouse_Buenting</data>
  <data key="d3">3252</data>
  <data key="d6">0.0</data>
  <data key="d4">0.0</data>
</node>
<node id="1724">
  <data key="d0">Eggs</data>
  <data key="d1">Hameln-Pyrmont</data>
  <data key="d2">Store_Buenting</data>
  <data key="d3">3252</data>
  <data key="d6">26.25625978677745</data>
  <data key="d4">26.25625978677745</data>
</node>
<node id="1725">
  <data key="d0">Eggs</data>
  <data key="d1">Hameln-Pyrmont</data>
  <data key="d2">Warehouse_Coop</data>
  <data key="d3">3252</data>
  <data key="d6">0.0</data>
  <data key="d4">0.0</data>
</node>
<node id="1726">
  <data key="d0">Eggs</data>
  <data key="d1">Hameln-Pyrmont</data>
  <data key="d2">Store_Coop</data>
  <data key="d3">3252</data>
  <data key="d6">0.0</data>
  <data key="d4">0.0</data>
</node>
<node id="1727">
  <data key="d0">Eggs</data>
  <data key="d1">Hameln-Pyrmont</data>
  <data key="d2">Warehouse_Dennree</data>
  <data key="d3">3252</data>
  <data key="d6">0.0</data>
  <data key="d4">0.0</data>
</node>
<node id="1728">
  <data key="d0">Eggs</data>
  <data key="d1">Hameln-Pyrmont</data>
  <data key="d2">Store_Dennree</data>
  <data key="d3">3252</data>
  <data key="d6">0.0</data>
  <data key="d4">0.0</data>
</node>
<node id="1729">
  <data key="d0">Eggs</data>
  <data key="d1">Hameln-Pyrmont</data>
  <data key="d2">Warehouse_EdekaHessenring</data>
  <data key="d3">3252</data>
  <data key="d6">0.0</data>
  <data key="d4">0.0</data>
</node>
<node id="1730">
  <data key="d0">Eggs</data>
  <data key="d1">Hameln-Pyrmont</data>
  <data key="d2">Store_EdekaHessenring</data>
  <data key="d3">3252</data>
  <data key="d6">0.0</data>
  <data key="d4">0.0</data>
</node>
<node id="1731">
  <data key="d0">Eggs</data>
  <data key="d1">Hameln-Pyrmont</data>
  <data key="d2">Warehouse_EdekaMindenHannover</data>
  <data key="d3">3252</data>
  <data key="d6">0.0</data>
  <data key="d4">0.0</data>
</node>
<node id="1732">
  <data key="d0">Eggs</data>
  <data key="d1">Hameln-Pyrmont</data>
  <data key="d2">Store_EdekaMindenHannover</data>
  <data key="d3">3252</data>
  <data key="d6">335.2558421488932</data>
  <data key="d4">335.2558421488932</data>
</node>
<node id="1733">
  <data key="d0">Eggs</data>
  <data key="d1">Hameln-Pyrmont</data>
  <data key="d2">Warehouse_EdekaNord</data>
  <data key="d3">3252</data>
  <data key="d6">0.0</data>
  <data key="d4">0.0</data>
</node>
<node id="1734">
  <data key="d0">Eggs</data>
  <data key="d1">Hameln-Pyrmont</data>
  <data key="d2">Store_EdekaNord</data>
  <data key="d3">3252</data>
  <data key="d6">0.0</data>
  <data key="d4">0.0</data>
</node>
<node id="1735">
  <data key="d0">Eggs</data>
  <data key="d1">Hameln-Pyrmont</data>
  <data key="d2">Warehouse_EdekaNordbayern</data>
  <data key="d3">3252</data>
  <data key="d6">0.0</data>
  <data key="d4">0.0</data>
</node>
<node id="1736">
  <data key="d0">Eggs</data>
  <data key="d1">Hameln-Pyrmont</data>
  <data key="d2">Store_EdekaNordbayern</data>
  <data key="d3">3252</data>
  <data key="d6">0.0</data>
  <data key="d4">0.0</data>
</node>
<node id="1737">
  <data key="d0">Eggs</data>
  <data key="d1">Hameln-Pyrmont</data>
  <data key="d2">Warehouse_EdekaRheinRuhr</data>
  <data key="d3">3252</data>
  <data key="d6">0.0</data>
  <data key="d4">0.0</data>
</node>
<node id="1738">
  <data key="d0">Eggs</data>
  <data key="d1">Hameln-Pyrmont</data>
  <data key="d2">Store_EdekaRheinRuhr</data>
  <data key="d3">3252</data>
  <data key="d6">0.0</data>
  <data key="d4">0.0</data>
</node>
<node id="1739">
  <data key="d0">Eggs</data>
  <data key="d1">Hameln-Pyrmont</data>
  <data key="d2">Warehouse_EdekaSuedbayern</data>
  <data key="d3">3252</data>
  <data key="d6">0.0</data>
  <data key="d4">0.0</data>
</node>
<node id="1740">
  <data key="d0">Eggs</data>
  <data key="d1">Hameln-Pyrmont</data>
  <data key="d2">Store_EdekaSuedbayern</data>
  <data key="d3">3252</data>
  <data key="d6">0.0</data>
  <data key="d4">0.0</data>
</node>
<node id="1741">
  <data key="d0">Eggs</data>
  <data key="d1">Hameln-Pyrmont</data>
  <data key="d2">Warehouse_EdekaSuedwest</data>
  <data key="d3">3252</data>
  <data key="d6">0.0</data>
  <data key="d4">0.0</data>
</node>
<node id="1742">
  <data key="d0">Eggs</data>
  <data key="d1">Hameln-Pyrmont</data>
  <data key="d2">Store_EdekaSuedwest</data>
  <data key="d3">3252</data>
  <data key="d6">0.0</data>
  <data key="d4">0.0</data>
</node>
<node id="1743">
  <data key="d0">Eggs</data>
  <data key="d1">Hameln-Pyrmont</data>
  <data key="d2">Warehouse_Globus</data>
  <data key="d3">3252</data>
  <data key="d6">0.0</data>
  <data key="d4">0.0</data>
</node>
<node id="1744">
  <data key="d0">Eggs</data>
  <data key="d1">Hameln-Pyrmont</data>
  <data key="d2">Store_Globus</data>
  <data key="d3">3252</data>
  <data key="d6">0.0</data>
  <data key="d4">0.0</data>
</node>
<node id="1745">
  <data key="d0">Eggs</data>
  <data key="d1">Hameln-Pyrmont</data>
  <data key="d2">Warehouse_Kaes</data>
  <data key="d3">3252</data>
  <data key="d6">0.0</data>
  <data key="d4">0.0</data>
</node>
<node id="1746">
  <data key="d0">Eggs</data>
  <data key="d1">Hameln-Pyrmont</data>
  <data key="d2">Store_Kaes</data>
  <data key="d3">3252</data>
  <data key="d6">0.0</data>
  <data key="d4">0.0</data>
</node>
<node id="1747">
  <data key="d0">Eggs</data>
  <data key="d1">Hameln-Pyrmont</data>
  <data key="d2">Warehouse_KaisersTengelmann</data>
  <data key="d3">3252</data>
  <data key="d6">0.0</data>
  <data key="d4">0.0</data>
</node>
<node id="1748">
  <data key="d0">Eggs</data>
  <data key="d1">Hameln-Pyrmont</data>
  <data key="d2">Store_KaisersTengelmann</data>
  <data key="d3">3252</data>
  <data key="d6">0.0</data>
  <data key="d4">0.0</data>
</node>
<node id="1749">
  <data key="d0">Eggs</data>
  <data key="d1">Hameln-Pyrmont</data>
  <data key="d2">Warehouse_Kaufland</data>
  <data key="d3">3252</data>
  <data key="d6">0.0</data>
  <data key="d4">0.0</data>
</node>
<node id="1750">
  <data key="d0">Eggs</data>
  <data key="d1">Hameln-Pyrmont</data>
  <data key="d2">Store_Kaufland</data>
  <data key="d3">3252</data>
  <data key="d6">49.35039897677115</data>
  <data key="d4">49.35039897677115</data>
</node>
<node id="1751">
  <data key="d0">Eggs</data>
  <data key="d1">Hameln-Pyrmont</data>
  <data key="d2">Warehouse_KlaasKock</data>
  <data key="d3">3252</data>
  <data key="d6">0.0</data>
  <data key="d4">0.0</data>
</node>
<node id="1752">
  <data key="d0">Eggs</data>
  <data key="d1">Hameln-Pyrmont</data>
  <data key="d2">Store_KlaasKock</data>
  <data key="d3">3252</data>
  <data key="d6">0.0</data>
  <data key="d4">0.0</data>
</node>
<node id="1753">
  <data key="d0">Eggs</data>
  <data key="d1">Hameln-Pyrmont</data>
  <data key="d2">Warehouse_Lidl</data>
  <data key="d3">3252</data>
  <data key="d6">0.0</data>
  <data key="d4">0.0</data>
</node>
<node id="1754">
  <data key="d0">Eggs</data>
  <data key="d1">Hameln-Pyrmont</data>
  <data key="d2">Store_Lidl</data>
  <data key="d3">3252</data>
  <data key="d6">157.1112053817725</data>
  <data key="d4">157.1112053817725</data>
</node>
<node id="1755">
  <data key="d0">Eggs</data>
  <data key="d1">Hameln-Pyrmont</data>
  <data key="d2">Warehouse_Netto</data>
  <data key="d3">3252</data>
  <data key="d6">0.0</data>
  <data key="d4">0.0</data>
</node>
<node id="1756">
  <data key="d0">Eggs</data>
  <data key="d1">Hameln-Pyrmont</data>
  <data key="d2">Store_Netto</data>
  <data key="d3">3252</data>
  <data key="d6">21.35319638951725</data>
  <data key="d4">21.35319638951725</data>
</node>
<node id="1757">
  <data key="d0">Eggs</data>
  <data key="d1">Hameln-Pyrmont</data>
  <data key="d2">Warehouse_NettoNord</data>
  <data key="d3">3252</data>
  <data key="d6">0.0</data>
  <data key="d4">0.0</data>
</node>
<node id="1758">
  <data key="d0">Eggs</data>
  <data key="d1">Hameln-Pyrmont</data>
  <data key="d2">Store_NettoNord</data>
  <data key="d3">3252</data>
  <data key="d6">0.0</data>
  <data key="d4">0.0</data>
</node>
<node id="1759">
  <data key="d0">Eggs</data>
  <data key="d1">Hameln-Pyrmont</data>
  <data key="d2">Warehouse_Norma</data>
  <data key="d3">3252</data>
  <data key="d6">0.0</data>
  <data key="d4">0.0</data>
</node>
<node id="1760">
  <data key="d0">Eggs</data>
  <data key="d1">Hameln-Pyrmont</data>
  <data key="d2">Store_Norma</data>
  <data key="d3">3252</data>
  <data key="d6">0.0</data>
  <data key="d4">0.0</data>
</node>
<node id="1761">
  <data key="d0">Eggs</data>
  <data key="d1">Hameln-Pyrmont</data>
  <data key="d2">Warehouse_Penny</data>
  <data key="d3">3252</data>
  <data key="d6">0.0</data>
  <data key="d4">0.0</data>
</node>
<node id="1762">
  <data key="d0">Eggs</data>
  <data key="d1">Hameln-Pyrmont</data>
  <data key="d2">Store_Penny</data>
  <data key="d3">3252</data>
  <data key="d6">154.23332034425022</data>
  <data key="d4">154.23332034425022</data>
</node>
<node id="1763">
  <data key="d0">Eggs</data>
  <data key="d1">Hameln-Pyrmont</data>
  <data key="d2">Warehouse_Real</data>
  <data key="d3">3252</data>
  <data key="d6">0.0</data>
  <data key="d4">0.0</data>
</node>
<node id="1764">
  <data key="d0">Eggs</data>
  <data key="d1">Hameln-Pyrmont</data>
  <data key="d2">Store_Real</data>
  <data key="d3">3252</data>
  <data key="d6">41.53392109708097</data>
  <data key="d4">41.53392109708097</data>
</node>
<node id="1765">
  <data key="d0">Eggs</data>
  <data key="d1">Hameln-Pyrmont</data>
  <data key="d2">Warehouse_ReweHit</data>
  <data key="d3">3252</data>
  <data key="d6">0.0</data>
  <data key="d4">0.0</data>
</node>
<node id="1766">
  <data key="d0">Eggs</data>
  <data key="d1">Hameln-Pyrmont</data>
  <data key="d2">Store_ReweHit</data>
  <data key="d3">3252</data>
  <data key="d6">184.36228962596508</data>
  <data key="d4">184.36228962596508</data>
</node>
<node id="1767">
  <data key="d0">Eggs</data>
  <data key="d1">Hameln-Pyrmont</data>
  <data key="d2">Warehouse_Tegut</data>
  <data key="d3">3252</data>
  <data key="d6">0.0</data>
  <data key="d4">0.0</data>
</node>
<node id="1768">
  <data key="d0">Eggs</data>
  <data key="d1">Hameln-Pyrmont</data>
  <data key="d2">Store_Tegut</data>
  <data key="d3">3252</data>
  <data key="d6">0.0</data>
  <data key="d4">0.0</data>
</node>
<node id="1769">
  <data key="d0">Eggs</data>
  <data key="d1">Hameln-Pyrmont</data>
  <data key="d2">Warehouse_Wasgau</data>
  <data key="d3">3252</data>
  <data key="d6">0.0</data>
  <data key="d4">0.0</data>
</node>
<node id="1770">
  <data key="d0">Eggs</data>
  <data key="d1">Hameln-Pyrmont</data>
  <data key="d2">Store_Wasgau</data>
  <data key="d3">3252</data>
  <data key="d6">0.0</data>
  <data key="d4">0.0</data>
</node>
<node id="1771">
  <data key="d0">Eggs</data>
  <data key="d1">Hildesheim</data>
  <data key="d2">Producer</data>
  <data key="d3">3254</data>
  <data key="d4">507.24516623621656</data>
</node>
<node id="1772">
  <data key="d0">Eggs</data>
  <data key="d1">Hildesheim</data>
  <data key="d2">Consumer</data>
  <data key="d3">3254</data>
  <data key="d5">2567.849116209769</data>
</node>
<node id="1773">
  <data key="d0">Eggs</data>
  <data key="d1">Hildesheim</data>
  <data key="d2">Wholesale</data>
  <data key="d3">3254</data>
  <data key="d6">423.695104174612</data>
  <data key="d4">423.695104174612</data>
</node>
<node id="1774">
  <data key="d0">Eggs</data>
  <data key="d1">Hildesheim</data>
  <data key="d2">Warehouse_AldiNord</data>
  <data key="d3">3254</data>
  <data key="d6">0.0</data>
  <data key="d4">0.0</data>
</node>
<node id="1775">
  <data key="d0">Eggs</data>
  <data key="d1">Hildesheim</data>
  <data key="d2">Store_AldiNord</data>
  <data key="d3">3254</data>
  <data key="d6">313.26589616892363</data>
  <data key="d4">313.26589616892363</data>
</node>
<node id="1776">
  <data key="d0">Eggs</data>
  <data key="d1">Hildesheim</data>
  <data key="d2">Warehouse_AldiSued</data>
  <data key="d3">3254</data>
  <data key="d6">0.0</data>
  <data key="d4">0.0</data>
</node>
<node id="1777">
  <data key="d0">Eggs</data>
  <data key="d1">Hildesheim</data>
  <data key="d2">Store_AldiSued</data>
  <data key="d3">3254</data>
  <data key="d6">0.0</data>
  <data key="d4">0.0</data>
</node>
<node id="1778">
  <data key="d0">Eggs</data>
  <data key="d1">Hildesheim</data>
  <data key="d2">Warehouse_Alnatura</data>
  <data key="d3">3254</data>
  <data key="d6">0.0</data>
  <data key="d4">0.0</data>
</node>
<node id="1779">
  <data key="d0">Eggs</data>
  <data key="d1">Hildesheim</data>
  <data key="d2">Store_Alnatura</data>
  <data key="d3">3254</data>
  <data key="d6">0.0</data>
  <data key="d4">0.0</data>
</node>
<node id="1780">
  <data key="d0">Eggs</data>
  <data key="d1">Hildesheim</data>
  <data key="d2">Warehouse_BartelsLangness</data>
  <data key="d3">3254</data>
  <data key="d6">0.0</data>
  <data key="d4">0.0</data>
</node>
<node id="1781">
  <data key="d0">Eggs</data>
  <data key="d1">Hildesheim</data>
  <data key="d2">Store_BartelsLangness</data>
  <data key="d3">3254</data>
  <data key="d6">0.0</data>
  <data key="d4">0.0</data>
</node>
<node id="1782">
  <data key="d0">Eggs</data>
  <data key="d1">Hildesheim</data>
  <data key="d2">Warehouse_Buenting</data>
  <data key="d3">3254</data>
  <data key="d6">0.0</data>
  <data key="d4">0.0</data>
</node>
<node id="1783">
  <data key="d0">Eggs</data>
  <data key="d1">Hildesheim</data>
  <data key="d2">Store_Buenting</data>
  <data key="d3">3254</data>
  <data key="d6">0.0</data>
  <data key="d4">0.0</data>
</node>
<node id="1784">
  <data key="d0">Eggs</data>
  <data key="d1">Hildesheim</data>
  <data key="d2">Warehouse_Coop</data>
  <data key="d3">3254</data>
  <data key="d6">0.0</data>
  <data key="d4">0.0</data>
</node>
<node id="1785">
  <data key="d0">Eggs</data>
  <data key="d1">Hildesheim</data>
  <data key="d2">Store_Coop</data>
  <data key="d3">3254</data>
  <data key="d6">0.0</data>
  <data key="d4">0.0</data>
</node>
<node id="1786">
  <data key="d0">Eggs</data>
  <data key="d1">Hildesheim</data>
  <data key="d2">Warehouse_Dennree</data>
  <data key="d3">3254</data>
  <data key="d6">0.0</data>
  <data key="d4">0.0</data>
</node>
<node id="1787">
  <data key="d0">Eggs</data>
  <data key="d1">Hildesheim</data>
  <data key="d2">Store_Dennree</data>
  <data key="d3">3254</data>
  <data key="d6">0.0</data>
  <data key="d4">0.0</data>
</node>
<node id="1788">
  <data key="d0">Eggs</data>
  <data key="d1">Hildesheim</data>
  <data key="d2">Warehouse_EdekaHessenring</data>
  <data key="d3">3254</data>
  <data key="d6">0.0</data>
  <data key="d4">0.0</data>
</node>
<node id="1789">
  <data key="d0">Eggs</data>
  <data key="d1">Hildesheim</data>
  <data key="d2">Store_EdekaHessenring</data>
  <data key="d3">3254</data>
  <data key="d6">0.0</data>
  <data key="d4">0.0</data>
</node>
<node id="1790">
  <data key="d0">Eggs</data>
  <data key="d1">Hildesheim</data>
[truncated: 41,975,722 more chars]
