# Supplementary material
Source: publisher site journal article supplement (https://fesmj.pensoft.net/article/download/suppl/6072903/)
Supplement: Supplementary file 1 [file  › manifest.xml]

<?xml version="1.0" encoding="UTF-8"?>
<omexManifest xmlns="http://identifiers.org/combine.specifications/omex-manifest">
  <content location="." format="http://identifiers.org/combine.specifications/omex" />
  <content location="./manifest.xml" format="http://identifiers.org/combine.specifications/omex-manifest" />
  <content location="./model.sbml" format="http://purl.org/NET/mediatypes/application/sbml+xml" />
  <content location="./simulations/Simulation_Producers.py" format="http://purl.org/NET/mediatypes/application/python" />
  <content location="./model.py" format="http://purl.org/NET/mediatypes/application/python" />
  <content location="./visualization.py" format="http://purl.org/NET/mediatypes/application/python" />
  <content location="./sim.sedml" format="http://identifiers.org/combine.specifications/sed-ml" />
  <content location="./GermanyNUTS3.txt" format="http://purl.org/NET/mediatypes/text-xplain" />
  <content location="./workspace.RData" format="http://purl.org/NET/mediatypes/text/x-RData" />
  <content location="./Graph.txt" format="http://purl.org/NET/mediatypes/text-xplain" />
  <content location="./metaData.json" format="https://www.iana.org/assignments/media-types/application/json" />
  <content location="./packages.json" format="https://www.iana.org/assignments/media-types/application/json" />
  <content location="./README.txt" format="http://purl.org/NET/mediatypes/text-xplain" />
  <content location="./simulations/defaultSimulation.py" format="http://purl.org/NET/mediatypes/application/python" />
  <content location=".\metadata.rdf" format="http://identifiers.org/combine.specifications/omex-metadata" />
</omexManifest>
