# Supplementary material
Source: publisher site journal article supplement (https://fesmj.pensoft.net/article/download/suppl/6072903/)
Supplement: Supplementary file 1 [file  › metaData.json]

{
    "modelType": "genericModel",
    "generalInformation": {
        "name": "Predicting and visualising the egg supply chain network in Germany",
        "source": "none",
        "identifier": "1401ff44-8463-4cad-b7ac-192c51e8f0b6",
        "author": [
            {
                "title": "Dr.",
                "familyName": "Ganas",
                "givenName": "Petra",
                "email": "petra.ganas@bfr.bund.de",
                "telephone": "0049-30-18412-24133",
                "streetAddress": "Alt-Marienfelde 17-21, 12277 Berlin",
                "country": "Germany",
                "zipCode": "12277",
                "region": "Berlin",
                "organization": "German Federal Institute for Risk Assessment (BfR)"
            },
            {
                "title": "Dr.",
                "familyName": "Fuhrmann",
                "givenName": "Marcel",
                "email": "marcel.fuhrmann@bfr.bund.de",
                "telephone": "0049-30-18412-24129",
                "streetAddress": "Alt-Marienfelde 17-21, 12277 Berlin",
                "country": "Germany",
                "zipCode": "12277",
                "region": "Berlin",
                "organization": "German Federal Institute for Risk Assessment (BfR)"
            },
            {
                "familyName": "Filter",
                "givenName": "Matthias",
                "email": "matthias.filter@bfr.bund.de",
                "telephone": "0049-30-18412-24109",
                "streetAddress": "Alt-Marienfelde 17-21, 12277 Berlin",
                "country": "Germany",
                "zipCode": "12277",
                "region": "Berlin",
                "organization": "German Federal Institute for Risk Assessment (BfR)"
            }
        ],
        "creator": [
            {
                "title": "Dr.",
                "familyName": "Ganas",
                "givenName": "Petra",
                "email": "petra.ganas@bfr.bund.de",
                "telephone": "0049-30-18412-24133",
                "streetAddress": "Alt-Marienfelde 17-21, 12277 Berlin",
                "country": "Germany",
                "zipCode": "12277",
                "region": "Berlin",
                "organization": "German Federal Institute for Risk Assessment (BfR)"
            }
        ],
        "creationDate": [
            2020,
            7,
            29
        ],
        "modificationDate": [
            [
                2021,
                8,
                30
            ],
            [
                2021,
                10,
                21
            ],
            [
                2021,
                10,
                25
            ],
            [
                2021,
                10,
                25
            ],
            [
                2021,
                10,
                25
            ]
        ],
        "rights": "Creative Commons Attribution-NonCommercial 4.0",
        "availability": "Open access",
        "format": ".fskx",
        "reference": [
            {
                "date": [ 2019, 1, 1 ],
                "doi": "https://doi.org/10.1016/j.tre.2018.03.002",
                "authorList": "Balster, Andreas; Friedrich, Hanno",
                "title": "Dynamic freight flow modelling for risk evaluation in food supply",
                "journal": "Transportation Research Part E: Logistics and Transportation Review",
                "volume": "121",
                "status": "Published",
                "website": "https://www.sciencedirect.com/science/article/pii/S136655451730176X",
                "abstract": "This paper presents a calibrated dynamic multi-scale multi-regional input–output (MSMRIO) model of the German food supply system based on real data. The model comprises 51 commodity groups from farm to fork differentiating three different temperature ranges as well as living animals. Spatially, it works on an aggregate level of 402 regions within Germany as well as its 50 most important trading nations. It determines the commodity flows and the additionally needed transport capacity in case of disruptions. Showing how changes in production, inventories, sourcing, and consumption affect commodity flows, the model uncovers vulnerabilities and makes risk evaluation possible."
            }
        ],
        "language": "Data of egg supply chain network data cube - English, Geodata - German",
        "software": "FSK-Lab",
        "languageWrittenIn": "Python 3.4.8",
        "modelCategory": {},
        "status": "Uncurated",
        "objective": "The objective of the present network model is the prediction and visualisation of data obtained by a modelled food supply chain network data cube implemented as a graph.",
        "description": "The network model generates a dataframe as output regarding the estimates of food flows for chicken eggs in Germany on NUTS-3 level according to the selected  parameters and a choropleth map for illustrating the distribution of product quantities. The required data for the network model will be obtained from the modelled egg supply chain network data cube and geodata from Eurostat (https://ec.europa.eu/eurostat/de/web/gisco/geodata/reference-data/administrative-units-statistical-units/nuts). The two parameters product and actor are implemented into the network model, wherefore different parameter variations can be simulated."
    },
    "scope": {
        "product": [
            {
                "name": "Eggs Chicken",
                "unit": "tons per year",
                "originCountry": "Germany",
                "originArea": "NUTS-3 level"
            }
        ],
        "generalComment": "Predicting and visualising the egg supply chain network in Germany",
        "temporalInformation": "2012",
        "spatialInformation": [
            "Germany, urban and rural districts on NUTS3-level"
        ]
    },
    "dataBackground": {
        "study": {
            "identifier": "SCN",
            "title": "Egg supply chain network data cube",
            "description": "The modelled egg supply chain network data cube is an excerpt and reimplementation of the dynamic freight flow model described by Balster and Friedrich (2019). It covers the supply chains for the product chicken eggs in Germany on NUTS-3 level. The supply chain network data cube is defined as a directed graph with nodes and edges.",
            "designType": "Python NetworkX Graph",
            "protocolName": "Methods like multi-regional input-output analyses for the food sector, optimisation models and gravity models are applied in order to generate the graph for food flows in a multi-level supply network for Germany on NUTS-3 level (402 urban and rural districts, Landkreise).",
            "protocolParametersName": "In the graph, nodes have the following attributes: 1) actor: Producer, Wholesale, Warehouse, Store (Retailer and Discounter) and Consumer; 2) product: Eggs; 3) location: names of urban and rural districts in Germany on NUTS-3 level with corresponding location ID (AGS, Amtlicher Gemeindeschlüssel).  The edges contain the attribute for the quantities of product which are handled by the actors.",
            "protocolComponentsName": "The supply chain network data cube is based on the same data sources as the dynamic freight flow model described by Balster and Friedrich (2019)."
        }
    },
    "modelMath": {
        "parameter": [
            {
                "id": "product",
                "classification": "CONSTANT",
                "name": "product",
                "description": "product defined in modelled supply chain network data cube",
                "unit": "[]",
                "dataType": "STRING",
                "source": "Data",
                "value": "\"Eggs\""
            },
            {
                "id": "actor",
                "classification": "INPUT",
                "name": "actor",
                "description": "actor defined in modelled supply chain network data cube, which handles the product within the supply chains in Germany",
                "unit": "[]",
                "unitCategory": "-",
                "dataType": "STRING",
                "source": "Data",
                "subject": "-",
                "distribution": "-",
                "value": "\"Consumers\"",
                "variabilitySubject": "-",
                "minValue": "-",
                "maxValue": "-",
                "error": "-"
            },
            {
                "id": "outputTable",
                "classification": "OUTPUT",
                "name": "outputTable",
                "description": "dataframe with data of product, actor, location (districts in Germany on NUTS-3 level), AGS and calculated product quantities in tons per year",
                "unit": "[]",
                "unitCategory": "-",
                "dataType": "MATRIXOFNUMBERS",
                "source": "Model result",
                "subject": "-",
                "distribution": "-",
                "value": "-",
                "variabilitySubject": "-",
                "minValue": "-",
                "maxValue": "-",
                "error": "-"
            },
            {
                "id": "outputTableFile",
                "classification": "OUTPUT",
                "name": "outputTableFile",
                "description": "CSV file with data of product, actor, location (districts in Germany on NUTS-3 level), AGS and calculated product quantities in tons per year",
                "unit": "[]",
                "dataType": "FILE",
                "source": "Model result"
            }
        ]
    }
}
