# Supplementary material
Source: publisher site journal article supplement (https://fesmj.pensoft.net/article/download/suppl/6072903/)
Supplement: Supplementary file 1 [file  › metadata.rdf]

<?xml version="1.0" encoding="UTF-8"?>
<rdf:RDF xmlns:rdf="http://www.w3.org/1999/02/22-rdf-syntax-ns#" xmlns:dcterms="http://purl.org/dc/terms/" xmlns:vCard="http://www.w3.org/2006/vcard/ns#">
  <rdf:Description rdf:about=".">
    <dcterms:conformsTo>2.0</dcterms:conformsTo>
  </rdf:Description>
  <rdf:Description rdf:about="/model.py">
    <dc:type xmlns:dc="http://purl.org/dc/elements/1.1/">modelScript</dc:type>
  </rdf:Description>
  <rdf:Description rdf:about="/visualization.py">
    <dc:type xmlns:dc="http://purl.org/dc/elements/1.1/">visualizationScript</dc:type>
  </rdf:Description>
  <rdf:Description rdf:about="/workspace.RData">
    <dc:type xmlns:dc="http://purl.org/dc/elements/1.1/">workspace</dc:type>
  </rdf:Description>
  <rdf:Description rdf:about="/README.txt">
    <dc:type xmlns:dc="http://purl.org/dc/elements/1.1/">readme</dc:type>
  </rdf:Description>
</rdf:RDF>
