# Supplementary material
Source: publisher site journal article supplement (https://fesmj.pensoft.net/article/download/suppl/6072903/)
Supplement: Supplementary file 1 [file  › model.py]

import pandas as pd
import networkx as nx

##########Parameter##########
product
actor

#product = "Eggs"

#actor = "Consumers"
#actor = "Consumers Store"
#actor = "Consumers Wholesale"
#actor = "Consumers Directsale"
#actor = "Stores"
#actor = "Warehouses"
#actor = "Wholesale"
#actor = "Producers"

#actor = "Warehouses Aldi Nord"
#actor = "Stores Aldi Nord"
#actor = "Warehouses Aldi Sued"
#actor = "Stores Aldi Sued"
#actor = "Warehouses Alnatura"
#actor = "Stores Alnatura"
#actor = "Warehouses Bartels-Langness"
#actor = "Stores Bartels-Langness"
#actor = "Warehouses Buenting"
#actor = "Stores Buenting"
#actor = "Warehouses Coop"
#actor = "Stores Coop"
#actor = "Warehouses Dennree"
#actor = "Stores Dennree"
#actor = "Warehouses Edeka Hessenring"
#actor = "Stores Edeka Hessenring"
#actor = "Warehouses Edeka Minden-Hannover"
#actor = "Stores Edeka Minden-Hannover"
#actor = "Warehouses Edeka Nord"
#actor = "Stores Edeka Nord"
#actor = "Warehouses Edeka Nordbayern-Sachsen-Thueringen"
#actor = "Stores Edeka Nordbayern-Sachsen-Thueringen"
#actor = "Warehouses Edeka Rhein-Ruhr"
#actor = "Stores Edeka Rhein-Ruhr"
#actor = "Warehouses Edeka Suedbayern"
#actor = "Stores Edeka Suedbayern"
#actor = "Warehouses Edeka Suedwest"
#actor = "Stores Edeka Suedwest"
#actor = "Warehouses Edeka"
#actor = "Stores Edeka"
#actor = "Warehouses Globus"
#actor = "Stores Globus"
#actor = "Warehouses Kaes"
#actor = "Stores Kaes"
#actor = "Warehouses Kaisers Tengelmann"
#actor = "Stores Kaisers Tengelmann"
#actor = "Warehouses Kaufland"
#actor = "Stores Kaufland"
#actor = "Warehouses Klaas & Kock"
#actor = "Stores Klaas & Kock"
#actor = "Warehouses Lidl"
#actor = "Stores Lidl"
#actor = "Warehouses Netto"
#actor = "Stores Netto"
#actor = "Warehouses Netto Nord"
#actor = "Stores Netto Nord"
#actor = "Warehouses Norma"
#actor = "Stores Norma"
#actor = "Warehouses Penny"
#actor = "Stores Penny"
#actor = "Warehouses Real"
#actor = "Stores Real"
#actor = "Warehouses Rewe Hit"
#actor = "Stores Rewe Hit"
#actor = "Warehouses Tegut"
#actor = "Stores Tegut"
#actor = "Warehouses Wasgau"
#actor = "Stores Wasgau"
#############################

if actor == "Consumers":
    actorGD = "Consumer"
    ID = "IDin"
elif actor == "Consumers Wholesale":
    actorGD = "Wholesale"
    ID = "IDout"
elif actor == "Consumers Store":
    actorGD = "Store"
    ID = "IDout"
elif actor == "Warehouses":
    actorGD = "Warehouse"
    ID = "IDin"
elif actor == "Stores":
    actorGD = "Store"
    ID = "IDin"
elif actor == "Wholesale":
    actorGD = "Wholesale"
    ID = "IDin"
elif actor == "Producers":
    actorGD = "Producer"
    ID = "IDout"
elif actor == "Warehouses Aldi Nord":
    actorGD = "Warehouse_AldiNord"
    ID = "IDin"
elif actor == "Stores Aldi Nord":
    actorGD = "Store_AldiNord"
    ID = "IDin"
elif actor == "Warehouses Aldi Sued":
    actorGD = "Warehouse_AldiSued"
    ID = "IDin"
elif actor == "Stores Aldi Sued":
    actorGD = "Store_AldiSued"
    ID = "IDin"
elif actor == "Warehouses Alnatura":
    actorGD = "Warehouse_Alnatura"
    ID = "IDin"
elif actor == "Stores Alnatura":
    actorGD = "Store_Alnatura"
    ID = "IDin"
elif actor == "Warehouses Bartels-Langness":
    actorGD = "Warehouse_BartelsLangness"
    ID = "IDin"
elif actor == "Stores Bartels-Langness":
    actorGD = "Store_BartelsLangness"
    ID = "IDin"
elif actor == "Warehouses Buenting":
    actorGD = "Warehouse_Buenting"
    ID = "IDin"
elif actor == "Stores Buenting":
    actorGD = "Store_Buenting"
    ID = "IDin"
elif actor == "Warehouses Coop":
    actorGD = "Warehouse_Coop"
    ID = "IDin"
elif actor == "Stores Coop":
    actorGD = "Store_Coop"
    ID = "IDin"
elif actor == "Warehouses Dennree":
    actorGD = "Warehouse_Dennree"
    ID = "IDin"
elif actor == "Stores Dennree":
    actorGD = "Store_Dennree"
    ID = "IDin"
elif actor == "Warehouses Edeka Hessenring":
    actorGD = "Warehouse_EdekaHessenring"
    ID = "IDin"
elif actor == "Stores Edeka Hessenring":
    actorGD = "Store_EdekaHessenring"
    ID = "IDin"
elif actor == "Warehouses Edeka Minden-Hannover":
    actorGD = "Warehouse_EdekaMindenHannover"
    ID = "IDin"
elif actor == "Stores Edeka Minden-Hannover":
    actorGD = "Store_EdekaMindenHannover"
    ID = "IDin"
elif actor == "Warehouses Edeka Nord":
    actorGD = "Warehouse_EdekaNord"
    ID = "IDin"
elif actor == "Stores Edeka Nord":
    actorGD = "Store_EdekaNord"
    ID = "IDin"
elif actor == "Warehouses Edeka Nordbayern-Sachsen-Thueringen":
    actorGD = "Warehouse_EdekaNordbayern"
    ID = "IDin"
elif actor == "Stores Edeka Nordbayern-Sachsen-Thueringen":
    actorGD = "Store_EdekaNordbayern"
    ID = "IDin"
elif actor == "Warehouses Edeka Rhein-Ruhr":
    actorGD = "Warehouse_EdekaRheinRuhr"
    ID = "IDin"
elif actor == "Stores Edeka Rhein-Ruhr":
    actorGD = "Store_EdekaRheinRuhr"
    ID = "IDin"
elif actor == "Warehouses Edeka Suedbayern":
    actorGD = "Warehouse_EdekaSuedbayern"
    ID = "IDin"
elif actor == "Stores Edeka Suedbayern":
    actorGD = "Store_EdekaSuedbayern"
    ID = "IDin"
elif actor == "Warehouses Edeka Suedwest":
    actorGD = "Warehouse_EdekaSuedwest"
    ID = "IDin"
elif actor == "Stores Edeka Suedwest":
    actorGD = "Store_EdekaSuedwest"
    ID = "IDin"
elif actor == "Warehouses Edeka":
    actorGD = "Warehouse_Edeka"
    ID = "IDin"
elif actor == "Stores Edeka":
    actorGD = "Store_Edeka"
    ID = "IDin"
elif actor == "Warehouses Globus":
    actorGD = "Warehouse_Globus"
    ID = "IDin"
elif actor == "Stores Globus":
    actorGD = "Store_Globus"
    ID = "IDin"
elif actor == "Warehouses Kaes":
    actorGD = "Warehouse_Kaes"
    ID = "IDin"
elif actor == "Stores Kaes":
    actorGD = "Store_Kaes"
    ID = "IDin"
elif actor == "Warehouses Kaisers Tengelmann":
    actorGD = "Warehouse_KaisersTengelmann"
    ID = "IDin"
elif actor == "Stores Kaisers Tengelmann":
    actorGD = "Store_KaisersTengelmann"
    ID = "IDin"
elif actor == "Warehouses Kaufland":
    actorGD = "Warehouse_Kaufland"
    ID = "IDin"
elif actor == "Stores Kaufland":
    actorGD = "Store_Kaufland"
    ID = "IDin"
elif actor == "Warehouses Klaas & Kock":
    actorGD = "Warehouse_KlaasKock"
    ID = "IDin"
elif actor == "Stores Klaas & Kock":
    actorGD = "Store_KlaasKock"
    ID = "IDin"
elif actor == "Warehouses Lidl":
    actorGD = "Warehouse_Lidl"
    ID = "IDin"
elif actor == "Stores Lidl":
    actorGD = "Store_Lidl"
    ID = "IDin"
elif actor == "Warehouses Netto":
    actorGD = "Warehouse_Netto"
    ID = "IDin"
elif actor == "Stores Netto":
    actorGD = "Store_Netto"
    ID = "IDin"
elif actor == "Warehouses Netto Nord":
    actorGD = "Warehouse_NettoNord"
    ID = "IDin"
elif actor == "Stores Netto Nord":
    actorGD = "Store_NettoNord"
    ID = "IDin"
elif actor == "Warehouses Norma":
    actorGD = "Warehouse_Norma"
    ID = "IDin"
elif actor == "Stores Norma":
    actorGD = "Store_Norma"
    ID = "IDin"
elif actor == "Warehouses Penny":
    actorGD = "Warehouse_Penny"
    ID = "IDin"
elif actor == "Stores Penny":
    actorGD = "Store_Penny"
    ID = "IDin"
elif actor == "Warehouses Real":
    actorGD = "Warehouse_Real"
    ID = "IDin"
elif actor == "Stores Real":
    actorGD = "Store_Real"
    ID = "IDin"
elif actor == "Warehouses Rewe Hit":
    actorGD = "Warehouse_ReweHit"
    ID = "IDin"
elif actor == "Stores Rewe Hit":
    actorGD = "Store_ReweHit"
    ID = "IDin"
elif actor == "Warehouses Tegut":
    actorGD = "Warehouse_Tegut"
    ID = "IDin"
elif actor == "Stores Tegut":
    actorGD = "Store_Tegut"
    ID = "IDin"
elif actor == "Warehouses Wasgau":
    actorGD = "Warehouse_Wasgau"
    ID = "IDin"
elif actor == "Stores Wasgau":
    actorGD = "Store_Wasgau"
    ID = "IDin"

###load graph of supply chain network model

G = nx.read_graphml("Graph.txt", node_type = int , edge_key_type = int)

###generate nodeTable dataframe
###create pandas dataframe with 7 columns and RangeIndex 0 to 23717 (23718 entries)
###column 1 is int64, columns 2 to 5 are object, columns 6 to 7 are float64

nodesActor = nx.get_node_attributes(G,'actor')
nodesLoc = nx.get_node_attributes(G,'location')
nodesPrd = nx.get_node_attributes(G,'product')
nodesAGS = nx.get_node_attributes(G,'ags')
nodesOutput = nx.get_node_attributes(G,'output')
nodesReceived = nx.get_node_attributes(G,'received')

nodeTable1 = pd.DataFrame.from_dict(nodesActor, orient='index', columns=['actor'])
nodeTable2 = pd.DataFrame.from_dict(nodesLoc, orient='index', columns=['location'])
nodeTable3 = pd.DataFrame.from_dict(nodesPrd, orient='index', columns=['product'])
nodeTable4 = pd.DataFrame.from_dict(nodesAGS, orient='index', columns=['AGS'])
nodeTable5 = pd.DataFrame.from_dict(nodesOutput, orient='index', columns=['output'])
nodeTable6 = pd.DataFrame.from_dict(nodesReceived, orient='index', columns=['received'])

nodeTable = pd.concat([nodeTable1, nodeTable2, nodeTable3, nodeTable4, nodeTable5, nodeTable6], axis=1)
nodeTable = nodeTable.reset_index()
nodeTable.columns = ["ID", "actorGD", "location", "product", "AGS", "sending", "receiving"]

###add "0" in order to obtain 5-digit AGS numbers

nodeTable = nodeTable.astype({"AGS": str})
nodeTable["AGS_len"] = nodeTable["AGS"].str.len()
nodeTable.loc[nodeTable["AGS_len"] == 4, "AGS"] = "0" + nodeTable["AGS"]

###filter dataframe for product = Eggs
####23718 entries

nodeTable_product = nodeTable[nodeTable["product"] == product]

###generate edgeTable dataframe
###create pandas dataframe with 3 columns and RangeIndex 0 to 419257 (419258 entries)
###column 1 and 2 are int64, column 3 is float64

edgeTable = nx.to_pandas_edgelist(G)
edgeTable.columns = ["IDout", "IDin", "product_quantity"]

actors = ["Consumers", "Consumers Wholesale", "Consumers Store", "Stores", "Warehouses", "Wholesale", "Producers", "Warehouses Aldi Nord", "Stores Aldi Nord", "Warehouses Aldi Sued", "Stores Aldi Sued", "Warehouses Alnatura", "Stores Alnatura", "Warehouses Bartels-Langness", "Stores Bartels-Langness", "Warehouses Buenting", "Stores Buenting", "Warehouses Coop", "Stores Coop", "Warehouses Dennree", "Stores Dennree", "Warehouses Edeka Hessenring", "Stores Edeka Hessenring", "Warehouses Edeka Minden-Hannover", "Stores Edeka Minden-Hannover", "Warehouses Edeka Nord", "Stores Edeka Nord", "Warehouses Edeka Nordbayern-Sachsen-Thueringen", "Stores Edeka Nordbayern-Sachsen-Thueringen", "Warehouses Edeka Rhein-Ruhr", "Stores Edeka Rhein-Ruhr", "Warehouses Edeka Suedbayern", "Stores Edeka Suedbayern", "Warehouses Edeka Suedwest", "Stores Edeka Suedwest", "Warehouses Edeka", "Stores Edeka", "Warehouses Globus", "Stores Globus", "Warehouses Kaes", "Stores Kaes", "Warehouses Kaisers Tengelmann", "Stores Kaisers Tengelmann", "Warehouses Kaufland", "Stores Kaufland", "Warehouses Klaas & Kock", "Stores Klaas & Kock", "Warehouses Lidl", "Stores Lidl", "Warehouses Netto", "Stores Netto", "Warehouses Netto Nord", "Stores Netto Nord", "Warehouses Norma", "Stores Norma", "Warehouses Penny", "Stores Penny", "Warehouses Real", "Stores Real", "Warehouses Rewe Hit", "Stores Rewe Hit", "Warehouses Tegut", "Stores Tegut", "Warehouses Wasgau", "Stores Wasgau"]

if actor in actors:
    ###summation of product_quantity based on ID
    
	edgeTable_ID = edgeTable[[ID, "product_quantity"]]
	edgeTable_ID_sum = edgeTable_ID.groupby([ID]).sum()
	edgeTable_ID_sum.reset_index(level=0, inplace=True)
	edgeTable_ID_sum.columns = ["ID", "product_quantity"]
        
    ###merge of nodeTable_product with edgeTable_ID_sum
    
	node_edge_product_allactors_merged = pd.merge(nodeTable_product, edgeTable_ID_sum, how="outer", on="ID") 
    
    ###filter dataframe for actor

	node_edge_product_actor = node_edge_product_allactors_merged[node_edge_product_allactors_merged["actorGD"].str.match(actorGD)]

elif actor == "Consumers Directsale":
    #select nodeTable_product for actor = "Consumer"
	nodeTable_product_consumer = nodeTable_product[nodeTable_product["actorGD"] == "Consumer"]
    
    #select nodeTable_product for actor = "Producer"
	nodeTable_product_producer = nodeTable_product[nodeTable_product["actorGD"] == "Producer"]
    
    #select columns of nodeTable_product_producer
	nodeTable_product_producer = nodeTable_product_producer[["ID", "actorGD"]]
    
    #rename columns of nodeTable_product_producer
	nodeTable_product_producer.columns = ["IDout", "actorGD2"]
    
    #rename columns of edgeTable
	edgeTable.columns = ["IDout", "ID", "product_quantity"]
    
    #merge of nodeTable_product_consumer with edgeTable
	node_product_consumer_edge_merged = pd.merge(nodeTable_product_consumer, edgeTable, on = "ID", how = "inner")
    
    #merge of node_product_consumer_edge_merged with nodeTable_product_producer
	node_edge_product_actor = pd.merge(node_product_consumer_edge_merged, nodeTable_product_producer, on = "IDout", how = "inner")

###summation of product_quantity for Warehouse, Store, Consumer Store and Consumer Directsale with the same AGS

if actor == "Warehouses":
	node_edge_product_actor = node_edge_product_actor.groupby(["AGS"], as_index=False).agg({"ID":"unique", "actorGD":"unique", "location":"unique", "product":"unique", "sending":"sum", "receiving":"sum", "AGS_len":"unique", "product_quantity": "sum"})
elif actor == "Stores":
	node_edge_product_actor = node_edge_product_actor.groupby(["AGS"], as_index=False).agg({"ID":"unique", "actorGD":"unique", "location":"unique", "product":"unique", "sending":"sum", "receiving":"sum", "AGS_len":"unique", "product_quantity": "sum"})
elif actor == "Consumers Store":
	node_edge_product_actor = node_edge_product_actor.groupby(["AGS"], as_index=False).agg({"ID":"unique", "actorGD":"unique", "location":"unique", "product":"unique", "sending":"sum", "receiving":"sum", "AGS_len":"unique", "product_quantity": "sum"})
elif actor == "Consumers Directsale":
	node_edge_product_actor = node_edge_product_actor.groupby(["AGS"], as_index=False).agg({"ID":"unique", "actorGD":"unique", "location":"unique", "product":"unique", "sending":"sum", "receiving":"sum", "AGS_len":"unique", "IDout":"unique", "product_quantity": "sum", "actorGD2":"unique"})
elif actor == "Warehouses Edeka":
    node_edge_product_actor = node_edge_product_actor.groupby(["AGS"], as_index=False).agg({"ID":"unique", "actorGD":"unique", "location":"unique", "product":"unique", "sending":"sum", "receiving":"sum", "AGS_len":"unique", "product_quantity": "sum"})
elif actor == "Stores Edeka":
    node_edge_product_actor = node_edge_product_actor.groupby(["AGS"], as_index=False).agg({"ID":"unique", "actorGD":"unique", "location":"unique", "product":"unique", "sending":"sum", "receiving":"sum", "AGS_len":"unique", "product_quantity": "sum"})

###write generated dataframe of summary table into csv file

outputTable = node_edge_product_actor[["actorGD", "location", "AGS", "product", "product_quantity"]]
outputTable.columns = ["actor", "location", "AGS", "product", "product_quantity [tons per year]"]
outputTableFileName = "outputTable_{}_{}.csv".format(product, actor)
outputTable.to_csv(outputTableFileName, index = False)
outputTableFile = outputTableFileName
