# Supplementary material
Source: publisher site journal article supplement (https://fesmj.pensoft.net/article/download/suppl/6072903/)
Supplement: Supplementary file 1 [file  › model.sbml]

<?xml version='1.0' encoding='UTF-8' standalone='no'?>
<sbml xmlns="http://www.sbml.org/sbml/level3/version1/core" level="3" version="1" xmlns:fsk="https://foodrisklabs.bfr.bund.de/wp-content/uploads/2017/01/FSK-ML_guidance_document_021216.pdf">
  <model id="model">
    <listOfParameters>
      <parameter constant="true" id="product" name="product">
        <annotation>
  <fsk:parameter value="&quot;Eggs&quot;"/>
        </annotation>
            </parameter>
      <parameter constant="false" id="actor" name="actor">
        <annotation>
  <fsk:parameter value="&quot;Consumers&quot;"/>
        </annotation>
            </parameter>
      <parameter constant="false" id="outputTable" name="outputTable">
        <annotation>
  <fsk:parameter value="-"/>
        </annotation>
            </parameter>
      <parameter constant="false" id="outputTableFile" name="outputTableFile"/>
    </listOfParameters>
  </model>
</sbml>
