# Supplementary material
Source: publisher site journal article supplement (https://fesmj.pensoft.net/article/download/suppl/6072903/)
Supplement: Supplementary file 1 [file  › packages.json]

{"Language":"Python 3.4.8","PackageList":[]}
