# Supplementary material
Source: publisher site journal article supplement (https://fesmj.pensoft.net/article/download/suppl/6072903/)
Supplement: Supplementary file 1 [file  › simulations/defaultSimulation.py]

product = "Eggs"
actor = "Consumers"
